# Supplementary material for: Identification of Chromosomes and Chromosome Rearrangements in Crop Brassicas and Raphanus sativus: A Cytogenetic Toolkit Using Synthesized Massive Oligonucleotide Libraries
Source: Front Plant Sci. 2020 Dec 23;11:598039. doi: 10.3389/fpls.2020.598039 (PMC7783396; doi:10.3389/fpls.2020.598039)
Supplement: Supplementary file 1 [file Table_1.XLSX]

## Sheet: A01_14M15M_Atto488
A01:14M15M:301:	CACAAACCAAAATCAACAACAAGATGAGAACAAAAACCACCACCAAA
A01:14M15M:351:	GCAAAGTCACTGGTCTATTTTCACAGCAGGTTCAATAAACTAACATA
A01:14M15M:551:	GATGACAAGAGACGAGAGAGAGAGAAGTGAATCTTACATGGGAATTG
A01:14M15M:651:	CAGAGAAGTTTGTTTACAAGAATCTGTTAAAACACCTTTGGCTATTA
A01:14M15M:801:	CAAAGAGAATCTAATTAGGAAAACTGAGGTTATCAAGAACAGTGAAA
A01:14M15M:901:	GTGGTGGTGGTGGTGACAGTGGTGGAGAGTTGAAGAAGAGAAAAGAT
A01:14M15M:1001:	TTCCAAGTAATGGTGTTTGGTATTTATAACAGTGAGATGGTGCGTGA
A01:14M15M:1201:	TGGTTGCTTCATTCATGGAATGTTTTTCTTACAACTAATGTGCCAAA
A01:14M15M:4451:	CTGGGTCGTGTTTTAGAATTAGGCTCACATTAATATATAGCATAATT
A01:14M15M:4901:	GTGTTTAACAATTAGACTCGCATGAGGCGTATCATATTAACGTAGGC
A01:14M15M:4951:	TTTAATTCGAAAAACATTATAGTATTTAACGCGGCCGAACCACCGTT
A01:14M15M:5051:	CTCTTGAAAGTACATGTTGGAGGAGACGTGAGAGAAAATAAGGGCAA
A01:14M15M:5151:	TCCTACAAAATTCTTTTCTGAGCATTCAGCTAAAGTAGGATTGGACA
A01:14M15M:7701:	AAGCTAAACATAAAATGTAGAGTTGGTGAGTAAATGAAGAACGTCAC
A01:14M15M:7801:	AACAATCGTATTCGTCACGTAACTTAAATGTTCTCGTTCGTTTTAGA
A01:14M15M:7951:	TTGTTCAATGTACTTAGTGCGGTTGCTTTCTTCTTCCTCTTTTTTAA
A01:14M15M:8101:	AATGAGTAACGATAATGATTCATCGAAGTCACTCACCGGACCACACT
A01:14M15M:8201:	GCTAAACGCCTCGCCGGAACCTTCATCGGATCTAGAGTCACCTTCGC
A01:14M15M:8351:	CCCTCTACATCCTCCGATAAATCTCGCCAACATAGCTCCGGACAGTA
A01:14M15M:8601:	ACGGCTACGCCGATACAATCTCAGAGATGGCTGATAACAACCCTTCT
A01:14M15M:9101:	GAAGAGATCATAAGCAGTTTCAGAGAAGAGCTCGAGGAGATAGGAAT
A01:14M15M:10101:	GTGATACAATCAAATTGGTCTTACTTGACAGCCAAGAAAACAAAGAA
A01:14M15M:10201:	GCGTTGCGAGTGATCAAGCCCTCGAATATGACATAGAGGTCTCTGTT
A01:14M15M:10351:	GGATCGAGTCAGAGAGAGAGAATTCTCCTTACATCTTTTGTTTGCTT
A01:14M15M:10451:	ATAACCGACTCCTGATCAAGAATCAATAACAAGGTGTACATATGTTA
A01:14M15M:10551:	CTGACTTGTCGGAAGAACTCTTTTCCATCAACCCGAGTTCTTCCTGA
A01:14M15M:10651:	CACAAGAATAGTCAGTCTTTGGTTTTTAACTTACCGGTGTGGGATCC
A01:14M15M:10751:	TAGAGAATGAAACAGAATGGCGACGAGGGGAGATAGGTCTTGAAGTC
A01:14M15M:10851:	CCGGGGCGTAGCAGTCTGAGATACTAATGGAAGACTGTTCGATAAAC
A01:14M15M:11001:	ATTGAGATTTACTAACCTTCGTTTTCGTTGTCCACTGCAGCTGGCTC
A01:14M15M:11201:	GTTTGGTGTTGGCTTAGCAATGATTTGTGTTGTTCCTGCCTGTTAAT
A01:14M15M:11301:	GAAAGTGAAGTTACATACATTTTGGTCGTCGTCTTGAAGAGACATCA
A01:14M15M:11401:	TCTCCATAAAGCTGAAATCTTTATTGCTAAAATTACAAGACCCAAGT
A01:14M15M:11501:	AGTACTTGACAACGAAGAGTTCTCTCTCACCAGATTCTCCTGCAAAT
A01:14M15M:11601:	TCGGGTCAAAAGTCAAACACGGGTCGGACCTTTTCATCTTCGGCGAG
A01:14M15M:11701:	ATTGGAGCTCCGCGATTTGATTGTCTTTCTCGGCGAGAAGTTCTCGG
A01:14M15M:11851:	CTTGAAGGACTTCCTCGGGAAGATCGAAACTTATCGAACCTCTGACA
A01:14M15M:12101:	TCGATCGAGATAAGGTATCACGCAGAATTCTAACAAATGTCGGAATT
A01:14M15M:12201:	TTCGGTTCTGTGATGTCGATATGATTGATAGACGGGAAGGATATGGA
A01:14M15M:12301:	GGTGTCGAAACGGGTAAGCCAAATTCGTGATCTGTGAATAGATAGGA
A01:14M15M:76401:	ATCAGTCCGAGCAAACATGGATTCCGACGCGACCGTGCCACTGAGCG
A01:14M15M:76501:	CCGGTGGTTCCGATCGCTTACAAGGAAGACTTCCGCGAGACGATGGA
A01:14M15M:76601:	TCACGGAAGAAGCTCTCCGCTTAAACTCCGGCAACTACACCGTAACT
A01:14M15M:76801:	AAGTTCATCGAAAGCATTGCTAAGGATAACTCTAAGAACTACCAGTT
A01:14M15M:77151:	CTGAAAGACGTGTTACATAGTGCATCTTCTGTATATTTGAGATGAAA
A01:14M15M:77201:	TGCTCATCTGCTGCTTTATGGAAGTTTAGCTTTGTCTGCTGGCTTTG
A01:14M15M:77301:	ATCATCGGAGATGGGTTGCAGAGAAACTGGGTCCTGCTGTTGCAGGA
A01:14M15M:77401:	TGCTTGGTCACATAGGCAGGTTTGTCATCTCGAAACATTGCTTAACC
A01:14M15M:77551:	GTTTAAAGCACTCACTATGTATGCTATCTTCTTTGCTTTATGTTGGG
A01:14M15M:77651:	ATTACTGTCATGAGCTCCTTGAAGCTGACGTCTTTAACAACTCTGCA
A01:14M15M:77851:	AGCTACACAGTCAAAGCCATTTTAGCAAATCCCGGGAACGAGAGCTC
A01:14M15M:77951:	ACCCAAGTGTTTCCTCAGTCTGTTTGAAAGTTCTCTCACGCACGGAC
A01:14M15M:78101:	ATCCAGAGACTAACTTGGCCAATTTGGTGTGTACCATTCTGTGTCGT
A01:14M15M:78401:	AATAAAAAATACAATCGCGGCTTGGGATAGATTCCGGTTCAACATTA
A01:14M15M:78501:	GTGTGTGTTGTGATATGACAGAATCTGTGGTGTTTGAAATGGTAAGC
A01:14M15M:78651:	CCAAAGTTCAAAACTAAAGTCTAATACTCCTTTCTTTCGGTAAAATC
A01:14M15M:78801:	CATGCATTCCTTAATGGACGACTTCCGCATGGTTCTGGTGATCACAC
A01:14M15M:79301:	GATTACAGATGCAAAACCTTTACCTCTCCGGATCCCAGCCATCAAAG
A01:14M15M:79501:	AAAGACACTTCCAGACTATTCGGAAGTTATAACCCCTTTTTTTTTGT
A01:14M15M:80001:	CGGTAGCCACTTATATGGTCGTTGGTAGAAAGAGGAGGGGAACAACC
A01:14M15M:80201:	TTATAAAACGTCCGCCATATTTCTACTCTCTCTAATAGCTCACACCA
A01:14M15M:80351:	TCCTGAAGACGACATTAGAACTCTTCAAGGGGGATGGAGTGTACGGT
A01:14M15M:80451:	TGGATCAAACCGGGTTTCCAAAATCGGTACAATCCATTACAAACGGT
A01:14M15M:80551:	AGCCCTGTGTCCGATCCGGCAGCTTCCTTAACCAAAAAGGTTAGTCT
A01:14M15M:80701:	CCATAGATGTTGCAGCTCTGTTTGTTCTCTTTCTTTTAATTGAATTA
A01:14M15M:80951:	GTAAATAAACTTCATTAACCAGTTATGTTGTAATGAATCATCGGTCC
A01:14M15M:81051:	CTTTAGATTCTTATGCCACTTGGGAGATCCACTGTGCAATTAGTGAG
A01:14M15M:81151:	CACTATCCACATGATGCAATAGAAACAAAAACCAAAACGTCAATCAA
A01:14M15M:81551:	GGTATAGTAAAGTGATTGTTGAGATCAGATATGGTTGCCACATCTAC
A01:14M15M:81651:	TAGCACTTCGAGGTTCGGATAATTTGGAATGGATCTCTTGACTAGAT
A01:14M15M:82201:	GAAGTCCTTGGTATGTATCATCATCTTATACACATTGTTAATAGTTG
A01:14M15M:82901:	ACTGGTTGTCAGCATAACGTTTTATAAAACCATCTTTTAGATCAACG
A01:14M15M:83151:	ATGAAAGCACCTTACATTTAGAAAGGGAGAGAGTAGATTAGTGTTTT
A01:14M15M:83301:	CAAGTCGTGGTCGGTTTAGCAGCCAAAAGCGGAGAGCGTTTCGCTTA
A01:14M15M:83551:	CGACACTGAGTTAAGCGCTGAGGATCTCAAAGAGCTGGTTGAGCAGT
A01:14M15M:83751:	TAGCGATTGAAGCTGTGTTCGATTCTTGGGATAGTCCAAGAGCCATC
A01:14M15M:83851:	CCAATGCATGGTGTTTGGAAACATGGGGGACACTTCAGGAACTGGTG
A01:14M15M:84051:	GGGATAAGAACACCAGAAGATTTGGACACAATGAAAAGATTAATGCC
A01:14M15M:84701:	ACGCAGCAGAAGGTATATTAACAGCGAGAGGAGGCATGACGTCACAC
A01:14M15M:84801:	GATTCGAGTCGACGAGAACCATAAGGTTAAAAACATTTAATCTTTGA
A01:14M15M:84901:	GTTCTGTTGATTGGAGATTTGGCGATAAATGAAGGTGAGTGGATCTC
A01:14M15M:85051:	AGACGTCTCAAGGTGTGTATGAGTTTTCTTTAACTTAACTTGTTTGA
A01:14M15M:85101:	TCCTTAACTCAAATGTTCTTGATGATCAATAAAGGTTATGGCGAATG
A01:14M15M:85201:	GGTCTTTGTAGAACTGAGCATATGGTAACTTCTTCTCTGTTCTTGAC
A01:14M15M:85501:	CTGAAGGTGATTTGGACATCATAGTACAAGAGCTAGCTGCAGAGACA
A01:14M15M:85901:	ACTAGAAAGGATGACAATGACAGGAACTGGGTCACCAAGTTGATGTA
A01:14M15M:86101:	CTGCTAAAGTAAGAAGAAACCTTTTTCTTGACAGATTGCGGAACAAG
A01:14M15M:86201:	AGTAGAGATGATGTTGCCAAGTTTCTACCCATGTACCTCGCCAAAGG
A01:14M15M:86351:	TCAGGTTCTTGATCAGAAGGGTGTAGGACAATTGGTCAAGATGGCGA
A01:14M15M:87101:	AACACAAGAGCAAAGGGATACTACTATCACCTTAGACCATCAGAAAT
A01:14M15M:87251:	GTTCCTTATTCAAAGACAACTATTCGTTAAGGAACAAACCGTTCAGA
A01:14M15M:87401:	CACAGAAATTCCGTCTCCCTTGCCTAACGGGTTTATCAGCAACTATG
A01:14M15M:87551:	CACTTGATGTTTTCATAGAGTTATCAACACCTAGCTATTCTCTCCGT
A01:14M15M:87751:	GGCAGATAATCCTGATCCCTACAAAAGTCCAAAACTTTAGCCACACC
A01:14M15M:88001:	AGCATAGTATGATCTGAGATTCATAACAAACAAAGCACAGTATTATC
A01:14M15M:87901:	TAGTCAACAAAGTACCCTACACAGTGTGATCTCAGACTCATAGCAAA
A01:14M15M:88201:	GAGAAGAAATGCAGTGTTTCTTTTGAAAGGATGGTCGTTGACCTGAG
A01:14M15M:88501:	CGAGGATCAGCTCCGTTACACCGAAAGCCGTCGCGCTTCGAGCTAGT
A01:14M15M:88651:	GGGTTTTCTCCGAATGTCTTAGACCAAATTGAAGAACCGGGAGTAAT
A01:14M15M:91351:	TTTGGTAAACTGACTACTTTGGGGCTTTACCTCGACTTGGTAGTAGA
A01:14M15M:91501:	TCTCTTCCCTGCTTCTTCAGGTGATCCCAAGTCCTCAAGCGACTTGT
A01:14M15M:91601:	ATAGGGTCTCTAAAGAAGATGTCAGCGCCAGCTCCTCGGACTTGGAT
A01:14M15M:92001:	GTGATGAAATTTTTACCTGTTTGGCATCGGTTAACAAGTTTATGGGA
A01:14M15M:92101:	GAAAGACGACGAGGATTTTGAAGTGGGTTTTTTGAGAAGAGGAAAGA
A01:14M15M:92551:	GACAAAAGAATGAATCAGGCCCAAGCATGACCATGGCCATCTTCTAA
A01:14M15M:92701:	TCTCTGAATGGAGCATCAGATCTTGATGCCATCATTTGCTGTAACAA
A01:14M15M:92851:	ATTGTAACCGATTGTATCTTTGCTTTCCTGGTAACAAAGGTTCAAAT
A01:14M15M:92951:	AATTTTACCTTGACTTTTGCGTGAAGAATATCCCTGAGAACACTTAA
A01:14M15M:93051:	CAATCGTTGCAATCCTGCATACTAGTTCTACCTGGCATATATTTCAC
A01:14M15M:93251:	ATGTCAAGCTTTTCTAATTCAAGCCCTTCAGAGCTAAACTTATTGAA
A01:14M15M:93351:	TCAGGAATCAAACTCCAGCTTTCCATGTAGGAAAGAAGCTTTAAAGC
A01:14M15M:93551:	AGTGGTTTTCTTTTAATTTGGGAGAAAAGAAACTAACCAGCAAGACG
A01:14M15M:93651:	CGGAGAGAGCCCGAGCATCACAACATTTGGAGCCAAATCAGGAACTG
A01:14M15M:93851:	CTGGGAGATGCACATATACTTCTTACATAGGTACGATACGCAAGTTC
A01:14M15M:93951:	AAGAGCTTCTATGATTGAATCAGCAGCTGATAGGACGTCTACTGTGG
A01:14M15M:94051:	TGCCTGTTCTCCGCTGAGTTATCGATCTCAGACTCAAATAGCTCTTC
A01:14M15M:94151:	GACCCAAAGCTAAGAACTTCAAGCAGTATGACATTACCTCGAGGAAG
A01:14M15M:94301:	GATGTCCACCAAGCGTTAACAGCAGCTCAAACTTGTCTGCATCCCAA
A01:14M15M:94401:	AAATTTCACACCCATAACACTGTAAAACAAGAGTTGCATGTCAGCAA
A01:14M15M:94501:	AAATATAGTCGAGTAAAATTTTTGTGCCATTCTGAGGAATTTGGTAG
A01:14M15M:94601:	GAAATCGAGTCCCCAAATTTTGATATTCTTGTCCTGAGAACCAGTCA
A01:14M15M:94701:	CCATATAAGGAGAGGAAGAATTTTAAGGAATCCACATAGAAAACCTG
A01:14M15M:94901:	ATACAAAAGATATGCATACCTTCACCGTGGAATCTAACAGCGCAACT
A01:14M15M:95001:	CTTCATAGACCTCACATTCGAAACCGTGAGTTGCTTGGCTTCCTACA
A01:14M15M:95351:	TTTGACTTGGTATTCCCAGAATTTGACTTCATGATCTGCACTCACAG
A01:14M15M:95451:	TGTGCTTCAACATCTTCCACTTTTGTAGCACTCCCTATATCAATGAT
A01:14M15M:95551:	TCAAACTGCAGATTCCATATCCAGAATCAATTGTCCGGAGACAGGAA
A01:14M15M:95651:	TGTGTTGTCGGCACTGAGGGCTACACTCCTCACATCGGATCGATGTC
A01:14M15M:95751:	AACTCCAGTGAGTTATTGTTCAAAGACAGAGCCAGTGTCGCCAAGGA
A01:14M15M:95851:	TAATGACTTGTAAGAGCTTAAAAACGTCAGGGACAGTAGGAGTAGTA
A01:14M15M:95951:	CTCTTTCCTGCGAAGCCTACGCTTGGCTTTCCGCTTTGCATCCGTTT
A01:14M15M:96051:	AGACTTCCTGAGTTATGGAACCTCACACTCGCAACTCTATCCTTGGT
A01:14M15M:96151:	AGTGATCTCCGCTTGCATCAACTCCATTTGCATTTGAATCTGACAAC
A01:14M15M:96251:	AGCAGAACCAGTGACGAGATACTTTTCCTCTGGATCAACATCCACAG
A01:14M15M:96351:	AGATCCCAGACTCTCAAGAACTTGTCCTTAGATGCCGTAACAAGTTT
A01:14M15M:96451:	CGAGTGGTGTCAAATAAAAAACAAAGAGAAAAGTAACCAACAGCCAG
A01:14M15M:96551:	CACGGAGACGGAAAAGCCCAGTTTCACCAACAACATCCCACAAGATA
A01:14M15M:96651:	CAGGGCAGTCACAGCACCCTTGTGACCATTAAGAGTAGTCTCACATG
A01:14M15M:96751:	ACCTACACATTCCTCTTTACTTAGTTCATTTTTCCAAGGGAAAAAAA
A01:14M15M:96851:	AACAACCCACACAAAGGTTCATGCTTTCTAATGTAGTTGCCTAAAGT
A01:14M15M:96901:	CATCTTTAGCTTCAAAGAGCAAACAAACACTTTAAAGTATCTGCCTT
A01:14M15M:97001:	GCAAAGTACCGAAGTAGAGGCAGAGGAGGCGATAGAGGTAACGGCAA
A01:14M15M:97151:	CTTCCCCGTGGAATCGTAAGAGATGTTAGACTCCAGAGACGTTATGA
A01:14M15M:97251:	AGCTTTTTGTTTCGGGCCGTCTCCGTCTGCGTCTGCTACTTGCGTTG
A01:14M15M:100001:	TAGTATTTTTGAAAATCTCTGTCGTGGATGGAAGTACTCTAATGGAA
A01:14M15M:100301:	CCGTACATTTCACTGATTAATAATTTGATTTGAAATGGATTCGTCGA
A01:14M15M:605651	TGATGGTTTGTTTTATAAAAATGTAGGTTAACCACATGCTTGCTTCG
A01:14M15M:100651:	ATCCATGCCGACCCTAATCACTATTAAAAAGGGGGTCACCAAGTTAG
A01:14M15M:100801:	GGTCACATAAACCCACTTCTTCGTCTCGGAAAGCTCATAGCCTCTAA
A01:14M15M:123651:	ACCTGTGAGGTGTCTTATAAACAACGCTTTTGTGCCGTGGGTGTGTG
A01:14M15M:101451:	CATGTCTCAGCTATGCCCTGAAGTCATCATTAATCCCATCGGACCGC
A01:14M15M:101551:	TCTGTAAATCAGTGCATGGAGTGGCTTGACTCGAAAGGACCATCCTC
A01:14M15M:124301:	TGCCTCGTGAGCTTGAAGAGAAAGGGAAAATCGTTGAATGGTGTTCA
A01:14M15M:101801:	TGTTGCCTCATCCCGCGGTTGCTTGCTTCCTAAGTCACTGCGGATGG
A01:14M15M:101901:	GTGGGGAGATCAAGTGACAAATTCTGTGTACTTGGTTGATGTGTTCA
A01:14M15M:102001:	GAGGTTGTGGCGGAGAAGCTGCTTGAAGCGACGGTTGGAGAGAAGGC
A01:14M15M:102101:	TGGGGTATGGTGGATCATCTGATAAAAACTTTGGAGAGTTTGTTGAT
A01:14M15M:102201:	CGTTGGCATTTGGAAATATATCACATTGATTTCATCATAATGGTTGT
A01:14M15M:102251:	TGTGTCATTATTTTCATCTTTACATCACTTTCCCCTATAAGCTGGTT
A01:14M15M:100701:	GGGTGAAAAAGATTTAGCAGTCTTGTTGTTGTTATCATCAAGAAAAG
A01:14M15M:100901:	GTCAAGCCAATGAGATTCAAGACGGCTTGCTTAAACCCGTCGGTTTA
A01:14M15M:101101:	GTAAGGTGTGTAATAAACAACGCTTTTGTGCCGTGGGTATGTGACGT
A01:14M15M:101201:	GCCTTGCGGCTTATTATTATTACCAGCACCAGTTGGCTAAGTTTCCG
A01:14M15M:101351:	TTTTCACAGACCACATTTTACAACAAATCAAACGACTTCCAAACACC
A01:14M15M:101451:	CATGTCTCAGCTATGCCCTGAAGTCATCATTAATCCCATCGGACCGC
A01:14M15M:101901:	GTGGGGAGATCAAGTGACAAATTCTGTGTACTTGGTTGATGTGTTCA
A01:14M15M:102051:	GGAGCTGAGAGAAAATGCTCGGAGGTGGAAGAAGGAAGCTGAGGCTA
A01:14M15M:100851:	CTTACTAGTCACTTTTGTCACCACGGAGGAGCCACTTGGCAAGAAGA
A01:14M15M:100951:	TTCCTCCGGTTTGAGTTCTTTGACGATGGGTTTACTCTCGACGACTT
A01:14M15M:101051:	AATGAGAGATCAAGAAACTCATCAAGAGGTACGAGGAAATGAATCAA
A01:14M15M:101151:	TGCTGAGCTTCAAATCCCTTCGGCTGTTCTTTGGGTCCAGTCTTGCG
A01:14M15M:101251:	GAAACAGAACCAAAGATCAACGTTGAAGTCCCCTTCATGCCATTAGT
A01:14M15M:101351:	TTTTCACAGACCACATTTTACAACAAATCAAACGACTTCCAAACACC
A01:14M15M:101551:	TCTGTAAATCAGTGCATGGAGTGGCTTGACTCGAAAGGACCATCCTC
A01:14M15M:101651:	ACGAGATCGCTCACGGCCTTCTAAACTCAGGCTTATCCTTCTTATGG
A01:14M15M:124301:	TGCCTCGTGAGCTTGAAGAGAAAGGGAAAATCGTTGAATGGTGTTCA
A01:14M15M:101901:	GTGGGGAGATCAAGTGACAAATTCTGTGTACTTGGTTGATGTGTTCA
A01:14M15M:102001:	GAGGTTGTGGCGGAGAAGCTGCTTGAAGCGACGGTTGGAGAGAAGGC
A01:14M15M:102101:	TGGGGTATGGTGGATCATCTGATAAAAACTTTGGAGAGTTTGTTGAT
A01:14M15M:102251:	TGTGTCATTATTTTCATCTTTACATCACTTTCCCCTATAAGCTGGTT
A01:14M15M:116901:	AACAAACATGCATAAAAATACGAAAATTCCCCTTTTTCAACTGATGG
A01:14M15M:117001:	TCACAGAGGTAGTACAAGATTCTACAAAGTGATATGCTAAAAAGAAG
A01:14M15M:121451:	AACAGTATGCGCTCACCTTAAATAATCCACCTTTGCATTGTTTTAAG
A01:14M15M:123301:	AAATCGATGGAACCGTCTCTTGAGCATGTGATGCTCGTATCTTTCCC
A01:14M15M:123401:	AAGGCCTACTTGTCACCTTTGTCACCACAGAGCAGCCATGGGGAGAG
A01:14M15M:123501:	AGGTTTCCTCCGGTTCGAGTTCTTCAACGATGGGTTAGCCGACGATG
A01:14M15M:123651:	ACCTGTGAGGTGTCTTATAAACAACGCTTTTGTGCCGTGGGTGTGTG
A01:14M15M:123751:	GCTTGTCTCACCGCTTATTATTATTACCACCACCGGCTAGTTAAGTT
A01:14M15M:123851:	TGAAGCATGGCGAGATCCCAAGCTTCCTTCACCCTTCATCTCCCTTT
A01:14M15M:123951:	GCCTCTCTTTGTTTTCATAGACACTTTTCAAGAACTCGAAAAAGAGA
A01:14M15M:124051:	CCTCTCTTCAAGATGGCTCAAACTATAAGCTCTGACGTTAAGGGAGA
A01:14M15M:124151:	CCTCAGTCGTTTATATCTCCTTTGGCACTATAGTCCACTTGAAGCAA
A01:14M15M:135851:	GAGTTTTGAAATCGGGTTTATCGTTCTTGTGGGTGATACGACCTCCA
A01:14M15M:124401:	ATGGAACTCGACAATGGAGGCTTTGTCTTCGGGAGTTCCCATGGTCT
A01:14M15M:124501:	TTCAAGACAGGAGTGAGACTTGGCCGCGGAGCGGCTGAGGAGAAGAT
A01:14M15M:124601:	AGGCGGTGGAGATTAGAGAAAGCGCACGGAGGTGGAAGGAAGAAGCG
A01:14M15M:124701:	GGACGAGTTGGTTACGAAATCTATGGTGGCGAGAAAAGACAACGGAG
A01:14M15M:124901:	ATCTATCAATTTTTACATTCTATTTCATCACTTCGAGCCACAAGCAC
A01:14M15M:139501:	CACAAAATCAATCCAAAAGCCAAAAACATAACTTAAAAGCGGATGAA
A01:14M15M:139601:	TTAGGATGGCGGATGTGAGTGAAGAGGAAGGATATAAAGCTTTGCGG
A01:14M15M:139701:	ATCTCTCGTGGCTTCCCCAGCGCTCTCACCCAACCTGATCCATGTTA
A01:14M15M:139801:	CAATGACAAGTACTAAGTGAACACACAACTTGAACTAATACTGATTT
A01:14M15M:140951:	AAATGTGATCTAGAGTTAGACTTTGCAAGTGAAACTTACCTCTCGCT
A01:14M15M:141151:	TTGACTTACTAAGAGCATCAACTGAAGCCAGGAGAACTTCCCCTGGA
A01:14M15M:141251:	CGAACCACTCACCACTCCCACACCATTCAACATAGTCTTGCTCAGTT
A01:14M15M:141401:	GTTGAAGATTCTTGTTGATTTGGTTCTTGTTCGTGGTCGCATTTCTT
A01:14M15M:141501:	TTTGTTAACCTGTTTTCACGTAAAACAAAACCCATGATTCAGAATCA
A01:14M15M:141601:	ATAGATACCAAAATGACATTTAAGGGCTAAAGTACCCGAAATCCGAA
A01:14M15M:141801:	TGATTAGTGTAAGCATTACTGCATTTGAACATCCCTCTAATGATATG
A01:14M15M:141901:	TAGGCGCAAACTCTTTCCAATCGATTCCATTGTTAACACGCGAAGAA
A01:14M15M:142001:	CTCGAGGCTGTTCACGAAAACAACGTCGTTTGGGTCTCGAGGGAAGA
A01:14M15M:142151:	CTGTAGGTCGTTTCCGATCCTCACGACCATACCTAGAGCTACGCCAT
A01:14M15M:142251:	GATCCGTCGATGAGATGGGCTCTGCATCCCTGAATCTGTAGTAGCAC
A01:14M15M:142351:	GTGGTGGTTTAGTTCTTGGAGTATTTGATCTGAAACATCTCATTGTG
A01:14M15M:142451:	AGCCTTATTGGAAACTTGCATTAAAGTGCTTTTTTTTCTGAGTGAAC
A01:14M15M:142551:	TAGGACCCAACCTGACACACTTATGTTTGGCAATTAAAATTGGGTTC
A01:14M15M:147301:	CCGACATCAGCGATGAACGTCGGAGCAAAACCTTCTCATCGCTCCCT
A01:14M15M:147401:	ACACAGTTCTGATCCAAAGCGAGCTTGAAGTTGAGGTGCGCCGAGAA
A01:14M15M:147551:	CTTCCGTCATGAAGCTTAGAGAAGCTTCGGAAGTGATCTCTATGTAC
A01:14M15M:147751:	AGTTTGGTGTGTGGTTTGTGTTCTCAAGGGAGAGTGATAGATGCAGT
A01:14M15M:147851:	ATGGGACTATCATCGGTAAGCTTTGCGGGGCTGGCGAAACGGGCATG
A01:14M15M:147951:	CACTTACGGGTTTATAATCAGCTCCTTTGTTAAGAACAAGTCGATCG
A01:14M15M:148101:	GAAGGAGGCGCGTGGATGTTTCGATGAGATGATTGCTCAAGGGATCT
A01:14M15M:148251:	ACCACCGGATGTTTGCACTTACAACACTCTGATAAGTCGTCTCTGCA
A01:14M15M:148351:	GGTCCGGAGCCTAACTTACAGACGTATAACTCGCTGTTGGATGGTTT
A01:14M15M:148501:	TATTGCAAGTATGGGAAACTTGAGGAAGCCTTCGAGCTTATAAGGGA
A01:14M15M:148601:	GCTTTGTTAACAAAGCTGGAGACTCAGAAGTTGCCAAAGAAGTGATC
A01:14M15M:148751:	TTGATCAAATCTTGCCAAATGTTGTAGCGTACAACAGTATGATCATG
A01:14M15M:148901:	GTGGTGCAAGACAAGCCGGAAACTGGGACATTGCCTTGGAGATCTTT
A01:14M15M:149001:	TCTGATAAAAAGTGGTAGATGGGATGATGCAAAGAGACTCTTTGATG
A01:14M15M:149101:	AGTGGCTATTGCAAACATGGAAAGCTAGAAGAAGCCACTGAGCTTAT
A01:14M15M:149201:	TGATACACGCTTCTTGCCGAGCTGGAAATTCAGATGCTGCTCAAGAT
A01:14M15M:149301:	TGCTCTCATCAGTGGTCTGATTAAAAATGGGAAGCTGGATGACGCAA
A01:14M15M:149401:	TACAATATAGTTATCAATGCCCTCTGCAAACATGAGATGCTATCAGA
A01:14M15M:149501:	TTATGTTCAACACCGTTATAACTGGCTTCCTTCAACTGAACAAGGTT
A01:14M15M:149601:	CAGTGGGGTTAAACACAGACTGCATCGAGTTCTTGCTCGTGCTGATG
A01:14M15M:149701:	TGAGATCATTGTAATCATAGTTGGCATTGTCCCGTAATGTTTCTTCA
A01:14M15M:149801:	ACATGAAAGAATTACCATTAAAGGTAGAAAAGAGCAAAAGCATCAAG
A01:14M15M:149901:	CCACGCTTAGTGGCAACTAGCTCCGGTGTCTTATTAGGCTTCTCCAC
A01:14M15M:150151:	TAAAGAGTATCTGACAAAAGCAGGTTGGTAGCGGCATTTGCAGTGCA
A01:14M15M:150251:	GAAGCTTGTTTGGTGCTTAGAAGACCCATCAAGAGCAGCTGAGAAAC
A01:14M15M:150601:	CAGCATCAGTTGCTTCTTCCCTATCATTCTCGGTTCTCACGAGGAAA
A01:14M15M:150901:	GTTGTTAAAGAGCATACTCGTTTGCAGACTGGTTGAGGAAGCGGTTG
A01:14M15M:151251:	AAGGGGCTTCAAGAAGGGAAAAGCCTTCTCTATGCCTTCGATGTTGG
A01:14M15M:151351:	TATGCGATTGCCACTATGATCCTTCTTATCTTAAGGTCGACGTATGG
A01:14M15M:151451:	GCCACTCTGTTGGGTCTCTTGACTGTTCAGTTTGAGCACAGACCGCT
A01:14M15M:151551:	GCCTCTCCTTAACCTCTGCTTCTCCTCACTTATCTGAAACATTCCAA
A01:14M15M:151651:	TCTACTTCTCTCGTTAGACTCTCCACCATGGACGTGTAGTACTTGAT
A01:14M15M:151901:	CTGAGAGTTTTGTTGAGTCGTGGACTGCCTGAGGTAAAAGCAGATCA
A01:14M15M:152001:	TCCAAAGATGACTTTACCTGGTAAGTGAGGTAGTGATCTGGATGGTT
A01:14M15M:152101:	GAATGTTTCTCACCAGCACCTAAACATTAATCAAAAATGTTTTCAGC
A01:14M15M:152201:	ATTCATTACAGTAAACTGGTTAGGTCTCCTTTCGTCATTAGCAAGAA
A01:14M15M:152401:	AAAGTCAACAAACTTGGAGAAGCATCTTCTCTTACCTGCCTGATCCA
A01:14M15M:152501:	GTGTTTTAACCGATCCAGACCCTTGTTTGTCCAGTTAACAGGCACCA
A01:14M15M:152801:	ATATGACCTAAAGTCCAAGTTGATAAACTTGCTTCCGAAGCCACCGG
A01:14M15M:153001:	AAGCCATGAGTAATGCTGTGAATGTAGATAATGCTGTCTTTATCTTC
A01:14M15M:153151:	TTCTCTGTTTATACTCTACTCAAGAGTGAACATCCAAGCAGAAACAA
A01:14M15M:153301:	AGACAGAGCTTCCTTGTTCTGTAAGTAGGAACTGAGCTCAAGAAGAA
A01:14M15M:153401:	TTAGCGGGTTTTGAGGAAATATGTCAGAAAATACATTCGACTAAAGA
A01:14M15M:153451:	CTGCAAATTTATCGTTTGAAATCCGTGAAGGCAAAGTACTGTTTGCT
A01:14M15M:153501:	TTGGCAAAACGTGAGCCTTCTGTATTTATTACACGAGTAAAGAAGAA
A01:14M15M:153601:	TTAAAACCGTGACTAAAGAAAATGACAAGGAAATATTAGATGTAGGC
A01:14M15M:153751:	GTTATGTCCAGTGCATAAAACTAGTGGCTCTGATTATTCATTGGCTT
A01:14M15M:154401:	TAAAGTCTGTGGACCCATCATGAAGAAAGACGGTTAGTTTTTAGTGA
A01:14M15M:156051:	TGGTGGGTCCATAAACTTTACAGTAAACAGTTATGTGAACAATTTCA
A01:14M15M:156951:	TGCTAAATTAATGGAAACCAGTGTAGATATCCCATCATGGAGGAATG
A01:14M15M:157101:	GTAAGTACAAAAGCTTCTCCACAATTCTCAATTTTCAACCACACAAC
A01:14M15M:157201:	GTTGGTCTCTCAATGGAATCAATCATTGTCATGACTCATGACCCACT
A01:14M15M:157351:	AGGTTTCATGGGCTCTACTCATCCATAAGAATCATAAGATGAAAGGT
A01:14M15M:157501:	AACATTTAAAACAACTTTTACTTCCATATCAATTAGCTACCCTTGCC
A01:14M15M:158151:	TTGACCATTCCCTTGAAGCCTATACTGTAAGTCCCTATTAGAATATA
A01:14M15M:163551:	AATCCCAAGATCAAGGTGTTTGAACTCACGTCGTGTGAAGACCGCTC
A01:14M15M:163951:	TAAGTAAAAGTGTCCCAGCAAAAGCTAGAGTTTTGATTGACCAGGAT
A01:14M15M:164701:	CGAAGCCTAAGCCTCAACCACTGTCGTTTTCATCACTCCCAGACGAT
A01:14M15M:165001:	CCTTGGTTCCGATACCTTCCTGTCACCATCTTCAACACGTACCATAT
A01:14M15M:165101:	GGGGCCGCTATCTTCACGTGTTCGTATCTTTGATTGTCGGAGTCACA
A01:14M15M:165201:	TAGACATAAAGACTCAAACTTGGTGTCCCTTGCTGAGCCATGGAGCT
A01:14M15M:165351:	GGGAAGTTGTGGGAACGCACAAGTGTTATGGACATATAGATGTTTGG
A01:14M15M:165551:	ATTGTTAACCATGGTGGGAAACTATTAGTTATTTGGGTCCCAGGACT
A01:14M15M:165651:	TGAGAAGCGCCTTGAAGGTGAGATTTGTGGTAAGTTGGAGTGGGTTA
A01:14M15M:165251:	GAGTTTCGTGGCAACTGGTTTCTAGCCAATGTGTTTAGAGGAAAGAT
A01:14M15M:165651:	TGAGAAGCGCCTTGAAGGTGAGATTTGTGGTAAGTTGGAGTGGGTTA
A01:14M15M:166151:	TCTCTGACTTAAACTTGTCTAATTCTGTGAATGACATGGTTGCTGGA
A01:14M15M:166401:	TAAAAAGATATGGGGACTGTAGGTGGATAATATATATGCACCATTAC
A01:14M15M:166501:	TAGGAAGGACATAGTGATTTGGGATAGTGGTATTATTCACTCAAAGG
A01:14M15M:166751:	ATGCATGACGTTTCCATCTTAATTGTGTGATAAGAAGTTCAATGAAG
A01:14M15M:166801:	GCGGCAGAGATATTCGACGAGACCAACATAAATAGCACAGAGAAATG
A01:14M15M:166901:	GCAATTGGAAGACAAGATGAAGTTTGTCGTGTCCTCAGCGGATATCG
A01:14M15M:167101:	ATGGTATGCTTATGGATAGTGAGGTGGCAACACCAAAAGAAAATAAA
A01:14M15M:167201:	CTTACAATGGTGTTTCATGGGCTCATATTTACCTAAGATGAGGTTAT
A01:14M15M:173351:	AGAGCATTTTGTGCAGCACAATTTTTAGCAATGTCTTTCTTGACAAG
A01:14M15M:173451:	CAACTTCCCAAGTATTGTCATCGAACTTCAGTTTCAAGTTCTTCTTC
A01:14M15M:173601:	ACCAAAACATTCATGGACTAGTAGAACATGTCATTAATTACTCCAAC
A01:14M15M:173701:	ACGGTTTCGAAGGAGTCGCAGTCGGTGTAGATAGCTCCAATGGTAGA
A01:14M15M:174451:	GGTAACGATGCAGATTATATTTTACGGCGACTCGGGCAAGTTTCTCT
A01:14M15M:174601:	CTAAGAATTCTAAGCGTTCGTAAGAAACACAGTTTTCATCAAAACTA
A01:14M15M:174701:	GATCTTCTCCACGAATTCGATGCCCAAAGGCTGGTCTGTACCAATGG
A01:14M15M:174801:	AGGCTCAAATTCAGTAACCGCTGGAGGGATTCAGTGTCTGCGTTTGG
A01:14M15M:174901:	TTGGGGTCTTTTCTGATTTTGGTGCTTGTTTTTATTTTGTTTTTGGT
A01:14M15M:178001:	GAGCAACCCTTGATTCCAGAAACCTGAAAAAAATAAATGTTAAAAGT
A01:14M15M:178101:	CTCCATTTTAAGTACTGATCCTGATGTTTCCTACAACTCTGCTGGAT
A01:14M15M:178201:	GATGAAAACCTTGAGAGCAGCACTGCCTCGTTGCTCACGGTTTTGGA
A01:14M15M:178351:	AGAGCCTGGTCTGTCTCTGCCAGTACCTTTCTCACATTCAAAGTCAG
A01:14M15M:179101:	TCCATAGCCGGGAACACAATCGGCATAATCACTTTATAGTTTTGAGT
A01:14M15M:179201:	CCTGAGGAAAATAAAGAAGCAGCTTAGAATCTAACAAACTCTTAGCA
A01:14M15M:179751:	TACTCCCTCTCTCTCTGGTCTTCAGAGTCAAACAAATCCAAAAGCTT
A01:14M15M:179851:	GCGAAGCCACGAATCTAAGGAGAAGCTCGTAGACAACTTGAAGGTGA
A01:14M15M:179951:	CAGCATCTTGCTTTCTTGATTCGCGGAAGAGAACTCCCTGAAGAGAT
A01:14M15M:180051:	GAGACGGTGGAGATGTAGTCAACGAGCTCGAGCAAAGTCTGCCTCTT
A01:14M15M:180151:	AGCATAGAGTCAGTTTCTTGATGAAGAGGTTTGGTTTCTCTGAGGTG
A01:14M15M:180251:	TGAGGAAGGAGCAACGGTGCCATTTGGTGCATTTGAGTTTGAAGGTT
A01:14M15M:180301:	AGCTGGGAGGGACTTCTACGTTTGGATTGGATGATTTGGAAGTTTTT
A01:14M15M:196051:	TTGGTTGTTTGTCAAGTTGGACTGTTGCTGGCTATTAAAATGCATAA
A01:14M15M:196051:	TTGGTTGTTTGTCAAGTTGGACTGTTGCTGGCTATTAAAATGCATAA
A01:14M15M:196051:	TTGGTTGTTTGTCAAGTTGGACTGTTGCTGGCTATTAAAATGCATAA
A01:14M15M:196051:	TTGGTTGTTTGTCAAGTTGGACTGTTGCTGGCTATTAAAATGCATAA
A01:14M15M:196051:	TTGGTTGTTTGTCAAGTTGGACTGTTGCTGGCTATTAAAATGCATAA
A01:14M15M:196051:	TTGGTTGTTTGTCAAGTTGGACTGTTGCTGGCTATTAAAATGCATAA
A01:14M15M:196051:	TTGGTTGTTTGTCAAGTTGGACTGTTGCTGGCTATTAAAATGCATAA
A01:14M15M:196051:	TTGGTTGTTTGTCAAGTTGGACTGTTGCTGGCTATTAAAATGCATAA
A01:14M15M:196051:	TTGGTTGTTTGTCAAGTTGGACTGTTGCTGGCTATTAAAATGCATAA
A01:14M15M:196051:	TTGGTTGTTTGTCAAGTTGGACTGTTGCTGGCTATTAAAATGCATAA
A01:14M15M:196051:	TTGGTTGTTTGTCAAGTTGGACTGTTGCTGGCTATTAAAATGCATAA
A01:14M15M:196051:	TTGGTTGTTTGTCAAGTTGGACTGTTGCTGGCTATTAAAATGCATAA
A01:14M15M:196051:	TTGGTTGTTTGTCAAGTTGGACTGTTGCTGGCTATTAAAATGCATAA
A01:14M15M:197401:	GTGCACACTTGGCACGGCGCTAAAGTGGAATTTTACCTTGCTTACTG
A01:14M15M:197501:	GTCAAGATATCGATGTCTTGCATCATTCTCAATTTTAAACCTTGTGA
A01:14M15M:197651:	CCAGGCATGTGATTCGTCTTTGCCATCTCTATGTTCAATCCACTATC
A01:14M15M:197901:	AAATCAAATAACCTGTGGACTTTCTCCTTCACAAATGTTGGCAACTG
A01:14M15M:198001:	CCATCGATCCTGGAGGAAGCTTTCCTTTACACTTTGGATTGTTCCAC
A01:14M15M:198101:	TAAATTGAAGACCTCTACCATGTTGGTTTGTTTATCTCTTTCAAATG
A01:14M15M:198151:	GTTTTAGTTTTTTAGGTTGCATACTTATCTGAGGGAGGAGAGAGTTC
A01:14M15M:201801:	ATTGCGCTATTTCACTCTTCACGCTAATATTAACTGTACTGATCTGT
A01:14M15M:202401:	ACTTTAATTTTGGTATAGGAGAAGGTCGATCATGGTATAGACCGGTG
A01:14M15M:202451:	ATCAAGTCAAAACAGTTGAGTAAATGAAGATGAGTATGTGACATAGT
A01:14M15M:202651:	TGTATGTGAATTGCTGAAAGAGATCAAGGGTCGTCATATCTATTAGA
A01:14M15M:236051:	AACCACCGGTAAGGAAATCATAAAACCATCTTCCACAACCCCAGATG
A01:14M15M:236151:	ACAGTCGCCTATCTCTTCTACGCCAAAGATGAGTTGATCTCACCAGA
A01:14M15M:236251:	ACCCCCTCGCGGGAAGAATCAACGGAGTGACTGTCGACTGTAACGAC
A01:14M15M:236351:	TCTCGCATCTCCAGATCTCAATGCCCTCCAACAGTTGCTTCCTCTAG
A01:14M15M:236451:	AAGGCGACTTACTTCCAATGCGGAGGCATGGCCATCGGAGTCTGCAT
A01:14M15M:236551:	CTGCTGAGGCTCGCGGAGAGGCCGGGAACACGGTGATGGATCCTAAG
A01:14M15M:236651:	GGACGAAAAAGCCAACAAGAGAAGCAGCATCACGAAGAGATTCGTCT
A01:14M15M:236751:	GCAGACCGACCTACGCGTGTAGAGAGCGTCACCGCCCTTCTCTGGAA
A01:14M15M:236851:	AGCTCGCTGACTTGCGCTCCAAGCTACCGTCCCTTCTCCCAGAAAGC
A01:14M15M:237051:	GGTTCTAAACTAGCTAATCTGATGCTCACTAATTATGCCCGGATGAG
A01:14M15M:237151:	ACGAGGCTAGCTTTGGATGGGGATACCCTGTTTGGGTTGTTGGAAAT
A01:14M15M:237251:	TGGGATTGAAGCTTTTGTCACGCTGCCTGAAGAGAACATGTCATCGC
A01:14M15M:237451:	ATTTTATCTGAAATTGCATTATTACGCACAAACAAACATGTTCCGGT
A01:14M15M:194301:	AGCACTGTCGGCGCTGTGCTTGTGATCCTCAGTGACTCATTTATCAC
A01:14M15M:194551:	CTCTTTAATTCCTGCATGACTTTAGGGTTGTCGCTTATGAGCTTTAC
A01:14M15M:197451:	CCTTGACGTCAAGACCGCCGTTTCTGGCTCCTACCTCCATATGTGTG
A01:14M15M:193801:	CTGGAAACGTAAGTATAAACCTTCGAAGTACTGTAGTCTCTGTCTTC
A01:14M15M:194901:	CATTCGATAGACGCCATTACCAGGAATGTTCCAGGATATTCGAAACC
A01:14M15M:197501:	GTCAAGATATCGATGTCTTGCATCATTCTCAATTTTAAACCTTGTGA
A01:14M15M:197601:	GTACGAACAAGTTATTTTCGCCGAATAACCGCGCTAAGCTCTTCGGC
A01:14M15M:238051:	ATCCACAGCCAGAGAGTCACCGGAGATCATATCCCGGAGGCTGAAAA
A01:14M15M:238201:	AACCGATCTCCTTCTCTCAGATTTCCTGAGAAACCTCAGTACAGACT
A01:14M15M:238401:	CCTTCGTACAAGCCTGGGCGGCTACAGCAAAAGGGACTACAACATCA
A01:14M15M:238551:	TAACCAATAGACTCGTCTTCAAATCCTCAAAGATCGATGAGCTTAAA
A01:14M15M:238751:	CCCTCTAATGTTTTGCCACAAGACTCCATAGGGAATCTACAAACTTG
A01:14M15M:238851:	CTGACTTTAGAAAGACCAAAGAAGAATTCAGCGAGATGATCAAAGAA
A01:14M15M:238951:	CCAGAACTTGCTGACTGTAATGGGAGATTTTGTGTCGGAGTGCTACA
A01:14M15M:239101:	TACCGTCTACGATAACATGGTGTTCGTGGTTCTGATAGATTCAAAGG
A01:14M15M:239201:	TTCCTATGTGAGCAAGACTTGCTTGCTTATGCCGTCCTAAATCCTCC
A01:14M15M:237901:	GTATCAAAGAAAGACAATGGAAGTGAAGCTAGAAGAGACCGGAAGAG
A01:14M15M:238001:	TTGGATCTCACCTGTCCAGCCATTTACGTTGCAACCACCTTCTTGTA
A01:14M15M:238101:	CTCTGTCCGAGACTCTGTCACGTTTCTACCCTCTAGCTGGACGACAA
A01:14M15M:238251:	TTGCAGCATTCCTCCCCGAGATCGAGGAGGGAGAATCTGCTGGGACG
A01:14M15M:238451:	TGTACTCCTCACTTTGCAGGAGCCACAATATACCCTCCTCCAGATAC
A01:14M15M:238551:	TAACCAATAGACTCGTCTTCAAATCCTCAAAGATCGATGAGCTTAAA
A01:14M15M:238801:	CTTTGTCAAGAAAGGGGCAGAGAGCGAGTTAGAGATCGACGAAATGG
A01:14M15M:238901:	CTCCAAGGGTGCGATAATGATACTACTAACATCACCACCACCACACT
A01:14M15M:239101:	TACCGTCTACGATAACATGGTGTTCGTGGTTCTGATAGATTCAAAGG
A01:14M15M:239201:	TTCCTATGTGAGCAAGACTTGCTTGCTTATGCCGTCCTAAATCCTCC
A01:14M15M:237901:	GTATCAAAGAAAGACAATGGAAGTGAAGCTAGAAGAGACCGGAAGAG
A01:14M15M:238001:	TTGGATCTCACCTGTCCAGCCATTTACGTTGCAACCACCTTCTTGTA
A01:14M15M:238101:	CTCTGTCCGAGACTCTGTCACGTTTCTACCCTCTAGCTGGACGACAA
A01:14M15M:238251:	TTGCAGCATTCCTCCCCGAGATCGAGGAGGGAGAATCTGCTGGGACG
A01:14M15M:238501:	CTTCAAGTCTCCTTCTATCGATGACGTTTACGAGCTTCAAGGAAAAT
A01:14M15M:238801:	CTTTGTCAAGAAAGGGGCAGAGAGCGAGTTAGAGATCGACGAAATGG
A01:14M15M:238951:	CCAGAACTTGCTGACTGTAATGGGAGATTTTGTGTCGGAGTGCTACA
A01:14M15M:239051:	GAGGTTGATTTCAGATGGGGTAATCCGGTCTGGATGGGACCTTCTTC
A01:14M15M:239151:	GTGAAGATGTCGAAGCTTGGGTGGGCTTACCCGAACAAGACATGCCT
A01:14M15M:239251:	GTTGATCTAAACAAGAATCCAACCAGTAAGTAACATCTCAGTTTATG
A01:14M15M:239351:	TGTTGTGATTTTGCATTTCTGTGAAATGGTTTGTGTTTTATGTTGTC
A01:14M15M:239451:	TGTGTTGCCGCCTTGCTTTCGCCAATTATGAATAACGCTTTAGTAAT
A01:14M15M:245151:	CATTTCATACACATGTAAACCATTTGCGGGGCGAATTCACGAGATGT
A01:14M15M:245251:	ATGCAAAACTCAAATCTCCTTTCAACTTTCCCTCCAATGAACCTAGA
A01:14M15M:245451:	CTAGATCCTCCGCCGTAACCGTCTCCATCACCCCCTCCAACAAATCT
A01:14M15M:245851:	CACGGCGATTTCTCTAGTTTGTTCATCGCTGAAACCTCCCAAGCTAC
A01:14M15M:245951:	ATCTCCGACTCCTTCCCGCCGTCGTCATCGCGAGATCCGTTTTGGAG
A01:14M15M:246151:	TAGCCACTCCTTGGAAACGAAAATGTATGGAAGACATTCAACGGGAT
A01:14M15M:246301:	TCCAAGGAACGCGGCGTTAGATGTGTACACCATGTAAGTCGGAACTC
A01:14M15M:246401:	CCGGCGAGCCGCGGCGGAGACGACGGCGAGTTTGGATCGAGGAGTTT
A01:14M15M:246501:	GGAGGCGTTCACCGGTAGGATTATCCGCGACGGAGATGGTCTCGTGA
A01:14M15M:246701:	TGACCGATTCCTGGCGACGGGATGAACACAAGCTCCATCGTCATTTT
A01:14M15M:247051:	GTTTGTTGGGTCACGGAAGGTTGGCCCATATAGTTTAATTGGGCCAA
A01:14M15M:247251:	GAAGTTTTTGTTTCTTGTGTGGAAGGGTATATGGTGATGATACAATA
A01:14M15M:247701:	ACTGAGCGTATTGAAATTGTTTTTAGTGTTTTTTTGGGCGTCCATTA
A01:14M15M:245301:	CAACATTCTCGAGCACGTCTTGAATAAACTTTCTTAAAGCCGCCTTC
A01:14M15M:245401:	TCTGTTCCTGACGTCACTATCTTCCTCCATCACACGCCTTATCGCTC
A01:14M15M:245701:	GATCACCTTCCCTCTATCCGACGTCCGATCCAAGAATCCCTCCGGGA
A01:14M15M:245801:	GATGCGCGACGGAGCGACCAGAGAAACCGGTGACCGCTGCGATCTAA
A01:14M15M:246251:	CTCGTGTCGAGCTTCTTCTCGTCGTACATCTTCTGGAGATGAAGCGA
A01:14M15M:246551:	AGACGATCTTGAGACGGGGTGAAGAAGGAAGAGATTTGGGCGAAATC
A01:14M15M:250551:	TCACTTTCGATGTCCAATATCACAGGAGAAAGCAGAGCGACTAATTA
A01:14M15M:251251:	AAAGCTGTGGTTACTATCCATCTTGGTCACTGGCGAGTCTTCTCTTT
A01:14M15M:251401:	AGGTGACTTTGTAATGACTCTACGATCTTCTTCAACTCGTATCTTTA
A01:14M15M:251501:	AGTTAATCTCCGGCAAGTTGTGCAGATCACGCGCCGAAGATGTCTCC
A01:14M15M:251601:	GCAGTGTCGGCTTCACAATACACGGCTGCGTTCTCACCGCAGAGATC
A01:14M15M:251701:	CTTGTTCCTCAAAACCTCTGCACATGTTTATTTTCTTATTACTCTCT
A01:14M15M:251901:	ATAATTTGTTTTCTTTTCTCCACCAGACGATCTCTCCTCCTCATGTT
A01:14M15M:252001:	GACCCTTTGGTTCACATCGCATTCTAGAATGAAATCATTGTGTTTTT
A01:14M15M:252351:	TAACATCAAAAGCGAATAACCATCTCTCACTAGTTAAATTCTAGTGA
A01:14M15M:252501:	GCATAAAGAAAATGATTTATTTTAGGGGTGACGACAAACTCTTCGTT
A01:14M15M:253351:	AGTCAGAGGATCCAAAGATCGAGAAAGAAACAAACTTAAAAGCCTAA
A01:14M15M:253451:	ATGTGTCGTTTTCTCGTATGCGAGTGTTGATCAAAACTAGGCTTGCA
A01:14M15M:257701:	AAAATGAACCAGACGCGACGAAAGAGACGACCCGATCCATCTCCGCC
A01:14M15M:257801:	TCGTCATCTACATCCTCTTCTCCTACGGCACTTTCCGCCGCGACCGA
A01:14M15M:257901:	GCTCTTCTCCATCGCCGCCTCCCACGGCTCCTGGCTCTCCCGCAGCT
A01:14M15M:258001:	GATCGCGGCGGATTCGACCCCGATCCAGCTCTCCCCCCTGTAACCGT
A01:14M15M:258101:	CGATCCGCGTGGCTCGCGTCGTCAAGGAGGCGGTTGATCGGGGGGAG
A01:14M15M:258201:	TGTGGATAATCTGGTGACGGTTTTGTCCAAGTATGATCATAGGAAGT
A01:14M15M:258301:	TTTGATATGGCATTTGGTGGCGGTGGATTCGCTATCAGTGCTTCGCT
A01:14M15M:258401:	TGTATGGTAGTGACTCCAGGATCTTCTCTTGTGTGGCTGAGCTTGGT
A01:14M15M:258501:	AAAGTTCCAACTTTAATGCTGATTGCTGAACAAGAGAGGTTTCTAAA
A01:14M15M:258751:	CTGATTGCTTAACCGGGAGAGGTTTCTAAATTTGGAAACCTCAGTGA
A01:14M15M:259051:	CTCGTCTCATCAGGGCTGCGAGTTTTGATTCAGCAAGGATTTTGCAG
A01:14M15M:259251:	AATTATATGTTCAGCACAAGGGATTATCCCAGGGACCCATGTGCGAG
A01:14M15M:259451:	TGGTGAACAGGTATAGTTTGTAAATACTCCTAAGCTTCTCAGTAGAG
A01:14M15M:259701:	GCTAACCAAAGCCTGAGCCTATGATTCGTCTGCTATAAGACCAATGG
A01:14M15M:259901:	CGACCAAGTTTGTTTCTTTGTATCTCCCTTTGCAAAACTCCGAAGGA
A01:14M15M:260151:	CTAAGAGATTTCAAGAGATCATTTACTTTGGAAATTGAGTTTACCAG
A01:14M15M:278651:	AACAGAACATAATCTGCGTTTCTGTTAGTCTCACAAGTCACAACGTA
A01:14M15M:278751:	CAGAGCTTCTCTTTTCGTTTGTTGAAATTTTGTTTGTGGTTGCCGCG
A01:14M15M:278901:	ATTTAGACGTCGTTGCGATATTGGGTGCTTTCCGTGAGATGAGAAAC
A01:14M15M:279001:	CTTGTTTGCGTTTCCGAGGAGATTATCTCTCGACGCGGCGCCAACCG
A01:14M15M:279201:	CATATTCAGACAACATGTTTGTTATTCCGACCACAAGTTTATTATTG
A01:14M15M:279301:	AGAATTGAAAGATAAGAACAGAGATTGCCTTATCTATATCCCTCCTC
A01:14M15M:279401:	TTCAGCAACTGGTTTGGACCTCTCCTTGATTCTACTACAAGCTATCC
A01:14M15M:279551:	GCTCCAGGTCCTTCTCCCCGTTTCGCTCCAGGTCCTGCTCCAACAAC
A01:14M15M:279651:	CTGAGGCGCCGGATGAATCAAGCTTTGGTGGTCCGACTAAGAAGAGA
A01:14M15M:279751:	ACCACCGGAGAAGAAGAATGATATCTTGATGGATCTTATCATCGCTG
A01:14M15M:279851:	TGCTTCAGACGCAACAACCGCAAAAATGCGGTTGGTCCTAGAAATGG
A01:14M15M:280051:	CTCTCCAAAGGTTGCAGCCACGAGTAGGAGATTCTTCACTGCTACTT
A01:14M15M:280151:	TTCCCACCAGCTGAAGCGTCGTCATCCTCTGGACTTCCTCTTCCTCC
A01:14M15M:280251:	AGGCTCCACCACCACCTCCTCCTAAATCTAAACCTCCTCCTCCTGCT
A01:14M15M:280351:	CTCCTCTGGAGATGGTTCTGACGTTGATTCGGAGACCGGAGCTCCGA
A01:14M15M:280751:	AAAGAAGGTAACGAGCTCCCAGTGGAGCTTCTCCAAACATTGTTGAA
A01:14M15M:280851:	TTCATCTACTTGGCCCTGCGGAGCGATTCTTGAAAATTCTTGTTGAT
A01:14M15M:281301:	CTTTCCGCGGTGACGCGCAAGCTTTCAAACTCGACACGCTCTTGAAA
A01:14M15M:281451:	CAAGCAAAAGCTTCTCCAGCGTTAAAACAGACGATACCAACACAGAC
A01:14M15M:281601:	CTGATGGATTAGCTTCAACACTGATGAACCTAAGTGGCTCGTTGACC
A01:14M15M:281701:	TTTAACTGGGTTCATAGAACGTGCAGATGGTGATATCAAGTGGTTGA
A01:14M15M:281851:	TGACTTCTTGATAATGTTGGAGAAAGTTTGCAGAGAAGTTAAAGAAA
A01:14M15M:281951:	ATTCCGGAAAGTAATCAACCGGATAACATTCGACGGCATTTGTTTCC
A01:14M15M:282201:	TAGATAGATGGTAGGAACAAGAACACGAGAGCTTTTGTTACTAAAAG
A01:14M15M:282451:	TGTTGCCTCCCCCTCGCTTTCCTAGAAAAGAGAAAGCTTCTGAATAA
A01:14M15M:282651:	GAACATCCATATTTTGTCCTTTGCCCATGGCTTTTGAGGTTGCTTTG
A01:14M15M:282801:	CTGTGAAACCATTGTTTTCACCGTCTTTGGGCCATAAACACGATGCT
A01:14M15M:283001:	TCCGGTACTCCTTTATACCCTCGCCTAACTTGTCCGCATATTTGGCC
A01:14M15M:283101:	CTGCCGACCATATCAAGACCCATCTGTCAGTAGAAGTTTAACAAGAC
A01:14M15M:283201:	AAAGCACTTTGTATAGGCATATATGTGAATCAAATCAGCTGCAGCAT
A01:14M15M:283351:	ATGTTTCATGCATATTGATGCACTAACCAAAGTAATGATCTTTGAAG
A01:14M15M:283451:	TGAGTTCATCAACAATGCCCTCTTCCACGTGTGGCGAAAGGCACTGA
A01:14M15M:283851:	AGCTGGAGAAAAAAATCAAAACCCAGCACAGAGTTCCAAAGCACAAA
A01:14M15M:285301:	ATAATATATACAAGCCCAATCATCATATTTTCTTCATACCTTCGGTC
A01:14M15M:287351:	CATACGTTCAGAGCTCCCTTCAGAGAATGTTTCATATCCAAGAACAG
A01:14M15M:287501:	TTCCACAAAACCACCTTGTTTGTTGCAAACAACACCGAGGCCCTACA
A01:14M15M:288101:	CGTCAGCGACAATCGTGTACTCTTCAATCAGTTCATATTTCCTTGTG
A01:14M15M:288201:	GGTCACAGAATCAAAGGATTCGTCTGCTGTAAAATATTTTTCAACAC
A01:14M15M:288301:	GAGCTGTAATTGTCATTGTCAGATAGCGCGGAAGATGTTTCACTTCC
A01:14M15M:288451:	CTCGTCCTGCTCATGTACTTCTTTTCAGTTACAGATTTGCTCAACTT
A01:14M15M:288551:	TCAATTCATCTCTTCTATATGAAGAAGTAGCCATAGAGACCTCTTCT
A01:14M15M:288651:	GTCTCCCCGATTCCTCTCTCTGGATATAAGATAGAATCAGAAGAAAT
A01:14M15M:288751:	AGAACTAGGAGTCTAGGAATAAATGTCAAAAACAAGTAATCCTACAT
A01:14M15M:288851:	CTTGAGAAATTATAACCTATAATCCAGAAAGGACATCAGCAGTCGTT
A01:14M15M:289501:	ATAGACTTATTAACATTAGTCTGTTTCAAACTCCTTGACCTGGAATG
A01:14M15M:289901:	ATCCTTGTATGAACTAACAATGGCCTTCCAGTGTCTACAAGTCATGG
A01:14M15M:290001:	AACACGTGACCATCTAACAAATCCCAGTACATCCCCACGCTGCCAGA
A01:14M15M:290251:	TTAAACATACGAAAGCAGGAACTGCACAGTGTTATAACCAGAAGAGA
A01:14M15M:290401:	GTTATGCATACCTGAATATGGGTGCATGTACTTGCCAGTCTCTTTCT
A01:14M15M:290551:	GAAATAACCAAGAAACTGAGGATGCATAGCATGGAACGAGCTTAGAC
A01:14M15M:290651:	TGACAATCTGAAGGCAGAACTGGGGCTTTCCCCTTGCCACTGATTTC
A01:14M15M:290751:	AGACACTAGTGTGGCGCTTTATTAAACCTTTAGCAACCAATATCTGG
A01:14M15M:290901:	CAGGGGTGCTAACAGATGCGTCAGTTCTCCAAAATCCCTGCATATCT
A01:14M15M:291051:	CACCACGAACTTTTACAAGGGGATCAGGAACTGATGGAACTTGATCA
A01:14M15M:291201:	CCAGCCTAGAGCGGCTGCGAGGATTATACAAATCATCCTTGTGATGC
A01:14M15M:291401:	CCTATCTCATCGCTCTCAGAACAATCAACATTTTCTGACTTCGATTC
A01:14M15M:291651:	GTCGTCTAAATGAATATCCATGTTCATGCACAAACCATCATATGGCA
A01:14M15M:291801:	GCTTGTATCGTTACGTTTTCTGATAGTAGAAGTAGGCCAAGTTAGGA
A01:14M15M:291951:	AAACCTTCTCGTCTCTTCAAGCTCAACTTTAATCTGCACAGCTTCTG
A01:14M15M:292101:	TGGCTGAAAACATCAAATTTCTGGCCGGAAAGATAATATTTTACATC
A01:14M15M:292201:	CATCCAAGAGACTCGCGATCCTGTTATCAAACTGGAAATCTTCATGA
A01:14M15M:292301:	ATCTTCAGCTCCTTGCTCCATATGAACTGCTTTGACAGCATCTGCAA
A01:14M15M:292401:	GCATCTGACACGATTGATGGAATATTTATGTTGACCACAGGAGATGT
A01:14M15M:292601:	GGATGAATCTGCCGCCATAGGCTCCTCGTGAGGTGGTGTATCACAAA
A01:14M15M:292701:	AGCACAGACTCTTTTCCCTTTGCACACGCACTTGGAATCTTGGAAGA
A01:14M15M:293551:	TTCCATTAGAATCCCTATGCCTTTGCTTATTCTCAAGCTCCATACCA
A01:14M15M:292901:	CTCCCTAACTCCACTCTTTCTGCTTATATCTCTATGGCCATTACGTC
A01:14M15M:293801:	AGGCTTCTCAAAGATATATGGCGATCTCTCCCGGGCATATGGCGACC
A01:14M15M:293851:	CCCGATTGTGGGAACTTCTATCCCTGTGGCCATGGTACCTAGACCGG
A01:14M15M:293201:	AGATCGTGCAGGGCTGTGTCCATGTCTGTCTGAAACAGCCCTGGCAG
A01:14M15M:294001:	GAGATGAGTGTTTTGATGAATAGGAATCTCTGTAGTCTCTCTCAACA
A01:14M15M:293351:	GTCTGGGTGAAGAGAGCGGGAACAATCATCAGAAAGTTTTCTATATT
A01:14M15M:294301:	CATTCCCACTTCTGAACTCTCTCCGGCGATAGGTATCCTCATTCAAA
A01:14M15M:294401:	CGTTTTCTCTCTGTCAACTCCATTCCTACGAGATCTGTTGTAAGTAT
A01:14M15M:294551:	TTTCCTGTACTTATCTGCGGGTAAATCCCTTCTCTCCACATAAGATT
A01:14M15M:294651:	TTATTCCGCAGTGACTTCACTGGAGAAATCTCACCGGTCTCCAAATC
A01:14M15M:294751:	CAGAATCTCCACCGTTTTCTTCTTTATTGCTACTTTCTCCTCCTTTT
A01:14M15M:294951:	TTCTTCTTCTTAGGTGGCTGAGACGCTGAGGGTTTAGCTGGCTGGGA
A01:14M15M:295201:	CACCGCCAAATTCAAGAACCTGTACACACCCAAGAAGCAATCAGTGG
A01:14M15M:295351:	GAAGCGGGGATTATACCGGGGAGGGTAAGGAAACGTAGCGAAGGGGA
A01:14M15M:295451:	TGAGAAATTTCTGGAGAATAAGAGATCGAGGTCAAAGAAGACGAATC
A01:14M15M:295551:	TCGCCGGAAAATCACCGTTGCGGCGTGTGTTCTTTCTCTCTCTGCGA
A01:14M15M:295651:	TGTTTTCCTGAAAGAAGAAGCCGTCGTGTTAATATTTTATTTTCTGT
A01:14M15M:302001:	GTTTTGGATAAACGGCAGCTGTTTACGGTTTTAGCATTACCGATATA
A01:14M15M:302501:	AGATCTTGAGATCTCACCATTTTTCACTGTATCAAAAGAAACACAAA
A01:14M15M:302651:	AATGAGGTCGATGTTGAGAAGCTTCGCTCTAATGGTGGTGCAAAGAC
A01:14M15M:302851:	GCGTTGGTGCCGGAGGTGGAGGAGGACACGGAGTTGGTGGAGGAGGC
A01:14M15M:302951:	GACTGGTGGGGTTGGAGTTGGCGGTGGAGGAGAAGGCGTAGGAGATG
A01:14M15M:303051:	GGGGATGGAGTGTACGGAGCTGGAGGCTTGACGGTGGGCGGCTTTGG
A01:14M15M:303151:	TTGGGGTGTGATGAGGTGGCTTAACGGTGGGTGGTTTTGGAGTGTGA
A01:14M15M:303151:	TTGGGGTGTGATGAGGTGGCTTAACGGTGGGTGGTTTTGGAGTGTGA
A01:14M15M:303201:	GGTGGTTTTGGAGTGTGATGAGGTGGTTTGACGGCGGGTGGTTTTGG
A01:14M15M:303351:	CAAGCGTAAGAGACGGCGCAGAAACCAAGGAGGAGAAGTATCAAAAA
A01:14M15M:303551:	CGTGATGATATGAACGTGCCAAATTGCTTTGTATGAGAGGGTTGAAG
A01:14M15M:304201:	TTGTTCTTTTCTGAAACCACAATCATAAGAGCATTTACGTTGGGTGG
A01:14M15M:305651:	TGACAATTTGAAGTTGTTTCTTTGGAGTTTAGCCTTTTTGTCTCTAC
A01:14M15M:305751:	AAGAGAATCAATATTACCTAGGTCCAAAGCTACAGTGTATTTTAAGT
A01:14M15M:311301:	GGATTCCGTGGATGGTTAATTTTAGTGCAAATTTGCAAACTATGATG
A01:14M15M:311401:	CCAAGTTAAGTTTTCACTAGCGTTGTCACAAAAGCTTTCATTAATAT
A01:14M15M:313551:	ACGCTCCTTTTAAGATCTTAGCTTCCCACGAGAAGTGATCGAGTCCG
A01:14M15M:313651:	TGGCATAGATTAAGAGTCGTTAGCACTTAGCAGACACAATAATAATG
A01:14M15M:313801:	GACTTGCGGGTCGATTTGGCGTGTAGTAAAAATAGTGTAACCCGTGA
A01:14M15M:313901:	GTGTGATAATGTCACGTATAGGAAGAATGAACCGTATATGAGTGGGA
A01:14M15M:314051:	TAATCAAATCCAAAATTGTCGAGATTAACTTCATTTCCAAATCAGCG
A01:14M15M:324101	GGTGATGGTTAATGGAAAAAGATGGTCTAGTTGTTTCAAAAGTGTTT
A01:14M15M:318801:	ATCCCATCTTAAAAGGATAGAATGATCCTAGACCAAAATAGAAACCT
A01:14M15M:324851:	TCGGTTATCTATTTCTATGTATGGTCTACATGTAATAATTGGGAGTG
A01:14M15M:325001:	GTCCATAACTGTGGAATCTGTTACACTTTGGTCTTCCGCATCTGGAA
A01:14M15M:325101:	TTGCCCTTCTCATTTAAGAAACCTTCCTGACATGATAGTTTTCATCC
A01:14M15M:325251:	CTGTTCCCTGAGAAAAAAACATTCATCTAGACATGAGTGATGTATGG
A01:14M15M:325501:	CTCTATACCAAGCAGGGCATCAGAAGCAACATCATTAACAAATTAAA
A01:14M15M:326051:	AAGCATTAAACCTTAAACTTACGGAAGAGCATCATGAGCTACGTAGT
A01:14M15M:326151:	ATCACTTCATCGACCCACCTTGTTTACCATATAAATAATTTTAAACC
A01:14M15M:326251:	TGTGTGTTTCCACATTACTTGCAATGTCGGAGAGATTCATAGCGTTC
A01:14M15M:326501:	AACAAATCATAGATTCCATCGGCGTAGACTCTAACCGGCCGGTTCGA
A01:14M15M:326651:	TCTCCTTGTTTCTTTAGTTTTCTATTGGGTCTCCCTCCAATCACGTA
A01:14M15M:326751:	GAGATAGATGGTGAGCTTAGTTGGCCATGTTCGAACACTGACATGTA
A01:14M15M:328901:	GTGCGGTTTGTGTTGGTTCTCTTGCTTCTTGTTTCTCAACACGTTCA
A01:14M15M:340301:	TTCGACCCTTTTCTTGTCACTCATTCTTCCAGTATAATTACTTCTAA
A01:14M15M:340401:	TTCACATGCTGGTAGCCTACTTTCACCAACTTACTTTCTTCTGTTTC
A01:14M15M:340501:	GAGAAAATTCTTCGTTTGCAACTAATAATTTTCTTAAAGCTAGCCAC
A01:14M15M:340651:	TATAGTTTTCAAAAGTTATTTTCACACACCCCACCACTCCCAAATCA
A01:14M15M:340801:	TGAAATATTGAAACTGTATTCGCATCTCCTATTTCTTTTCACAATCG
A01:14M15M:341101:	CAACACGAATTTAGATTGAGCAAGCTGTTTGGATAGTATATGAGTAT
A01:14M15M:341601:	AATGATCCACCGATCCTCATTGCAACCATGAAGTAGTACTATTGCTA
A01:14M15M:341701:	TTCATCCACAGCCAGAAAACCATCGGAAACCACTGTGTTAGGATAGC
A01:14M15M:341801:	TGCAATACTTCGTGGTGAGCAACTTGGTTCTGGAAATTAGCGTACTG
A01:14M15M:341901:	CAGATGACGGTGAACCGAAAGCCATGGCGGATGGACCGCCGGTGAAT
A01:14M15M:342001:	TGTACGGCGGGAGGCTCTAGACCTCCGACGAGTTGGCTTTGAAACAC
A01:14M15M:342151:	GTCGTTGTTGGGGTTGGCCATCTTCTTATTATGCGAGAGATTATACT
A01:14M15M:342301:	GCTTGGTCAAAAGAAGTTCATCTATACGAATCGTTGCCGTTGCTTTT
A01:14M15M:342401:	GAGGTTGTCGATTTGCATTTCTTTATTCTTTCGCATAATGTAATTCC
A01:14M15M:345101:	CATGACAAATCTTGATCCTTTCACATTAACTTATACTCAGCACATAT
A01:14M15M:345401:	ACAAAAACCAGCAGCAACACATCCTACTCTATCTCATATATAAAGAT
A01:14M15M:345551:	CCCTGCACAAGGTTATTTTGAGTACTTTCTTACATCTTTGAAACTAA
A01:14M15M:345701:	CTGTTTTTTCTTTTTCTTGGTGAGCACAATTTTTAAGCTGGCTATTA
A01:14M15M:345851:	AATTCAAGGGCTGGACTACACAAATCGTTATAAAGTTGAACTCTCCA
A01:14M15M:345901:	TTAGAATCTTTTGTCCACCTTTTCAAACGATATCGGGCCAATGGTTC
A01:14M15M:346601:	AAGAATAAAAGCTCCGGTAACCACTTTCATTTGTCTGTCTCTGCCTT
A01:14M15M:346901:	TTCGTCACTTGACTATGACTGACCTACCATAGTTAGAGCGCGACTAA
A01:14M15M:347101:	GTCAGTATGGTGAGGACACACGGCTGGCAACTCCCCGCTCACAAATT
A01:14M15M:347201:	TTGTTGACACTTGATAGTGATGGGGTTTGCTTATGTAAAGTTTGTTT
A01:14M15M:347301:	GTAGCCTACTATGCTTTCTTCGCTCCTTTTGTTGGTGGACGCATCTG
A01:14M15M:347451:	GTTTTGCAGGCTCTCATTGTTTTCGTGCTTTATGTTCGGTGTACTGC
A01:14M15M:347601:	AGTGAAGCGGGCAGTCACCTGCAGTCTTCTCCTTCTGTTGCCTCAAG
A01:14M15M:347751:	ATCCTGTGCGGCGTGTTTGTTTATGAAGATTGTCGCAAGAAGGAAGA
A01:14M15M:348051:	AAAGATCGAATGTTTAACTGTTACAGTGGCTTAACAATTGTGTCGGT
A01:14M15M:348251:	TTATAGTGCGTGTGTTTGTTAACAAAAGGGAAATGGAAACAGAGATT
A01:14M15M:348401:	ATGTTCCTGATGCTTTCTTGCAACTTATGCAGGGTCTCTGCACTGCT
A01:14M15M:348501:	TCTCATTAAAAAGGTGAGTGCGGAAGCTGTGGTTATGGTATATAATA
A01:14M15M:348601:	ACAACTTATGAGTACGTTGTGGCAATGAGAGCAATGAGTGAGGTTCC
A01:14M15M:348851:	ATTCATTTATAGATGTGTGGGCTTGATATACTTGTTACATTGGTTGC
A01:14M15M:348951:	CCAGATGCAACTGAATCAGCAGAGAGGGGCAACAAGATCCCAAAGAG
A01:14M15M:349051:	CAAGGGCAGCAGCCAGAGCCAGGGCGTCATCATCTGTTCTACGGCCA
A01:14M15M:349151:	TGTCGTCAGTAGTGTAAGCGCAGATGCAAATGCGGCTGCGATGAGGA
A01:14M15M:349201:	ATGATCCAAGGTTGCCTCTTTCTAGAAACTCTTTTGCTCCAAGCCAT
A01:14M15M:349301:	TCCAAGCCATGTTCACGAGGCTGTCTCGCTTAGTCCTCTCCCTCAGT
A01:14M15M:349401:	CCACCTCTCAATCCAGGAATGATCCACTCAACCTTTGATGAAAAGAT
A01:14M15M:349501:	CAGCTTCTCTTCTGAGAGATGTGAGAAGAACATCAGTTGTTTGGGAC
A01:14M15M:349601:	CAGATTAGCTTCACACCACCAGCCAATTCCTAGCTCACACGCTCAGA
A01:14M15M:349701:	CATCCTCCACCGCAGCAAGGAGAGAGACTAATGTATACAGGTGACTC
A01:14M15M:349801:	ACGAAGGTGACTCGGGAAGAGAGGGGCAAGACAGAATGACATTGGCA
A01:14M15M:349901:	GTTTGCTCCTGTGGGTACCCGCAAGTAGAAACCAATAACTATTTCAA
A01:14M15M:350101:	GAGGACTTAATGAGGCAGAAAGTAGAATCCTTTGTGAACATTTCTTC
A01:14M15M:350251:	TAGAGAATTAGCCATTGTTCAAAGTTACATCTTGGTTCTGGATACAG
A01:14M15M:350351:	GCCACTGATGCCCTCCCCCACCGAGATATAGCTTTACATATAAACAG
A01:14M15M:371151:	TGTATCAATAAATGTTAGTTTTCTTTGCATCCAAAACTTGTGAGGAC
A01:14M15M:405951	CCTTATTAGGATAACCAAAACCATTGCTCAATGTTTCAAATCTGAAC
A01:14M15M:377101:	TTCTTTCTCAGCCTCCTCGACCTTGTACCCATATAAAACGTTTATCT
A01:14M15M:377201:	TAAAAATGGAAGTGAAAGGTCAAGTGATGTGCGTGTTGTTGATGTGT
A01:14M15M:377301:	GATCTCGTCTAAATTCGGAGATCTAGAAATCGAGAAGAAGTTAAGGA
A01:14M15M:405351	GGTTGGAAATGATAAGACTATTCATGGAGAAAAATACGGATGCGTGG
A01:14M15M:393051:	TACCATTACAAGGTACAACTTTGGATCTATCCGCTATAAATGTAAAT
A01:14M15M:405151	GATATCCCATTCCGAAGAAAAGAGAAAAAGAGAGACAAACAATACTG
A01:14M15M:377851:	GTGACCCGTATTACGACCAACATCATGTAAGTTACTTCTTTTAGTTA
A01:14M15M:404851	GTATGTTTGGATACTGAGTGAAATAATTTGGATTAGTTTGCGGTGGG
A01:14M15M:378051:	TGGAGCAACAATGGAACTGTGTATAACCGCCCCTAAGGTTAAGCCTA
A01:14M15M:393601:	CACATTCAGATGGGAGACGATTTCATACAAATGGGTATAACTGTAAG
A01:14M15M:393751:	TATAATGTATTCAGGTAAATCCATTACTGTACAAGGATGACCAACCT
A01:14M15M:378351:	CCACGTACGGCCAGCCCTTGTTAGTAAATTCTCGTTCATATATATGT
A01:14M15M:393901:	TGAGACAGGCCGGTGGACAACAATGTTACAATCACCAATGTGACGTA
A01:14M15M:378501:	GGCCTGTCAATGCTGCCAGCTTCTGAACGTGGTGCTAAGACAAGTTA
A01:14M15M:394151:	TATAGTTACTCTGTCTACTAATCATTTTGTTGGCACCAGGACAAAGC
A01:14M15M:378751:	GCAGAAGAAATTGGTTTCTGGCCGTCGAACTTGTTTCGCCAAAGCTC
A01:14M15M:394301:	GGAGAAGTGTTCACCGCATCACTACCTGGTCCTCAAATGGGATATGG
A01:14M15M:378951:	AGTGGATTATATGGAATCATTTTCGGACGATAATCGAGGATACCAAG
A01:14M15M:394501:	ATTCCAAGATGCCGGTCATATAATCTTTTATGGTGGTTCAGGACTCA
A01:14M15M:377251:	ATCTTTGGTCATATAATAACAAGTCATAACTGTGGCTTTATCGAAGC
A01:14M15M:377501:	ATTTCTTCAAGCAACCAGCATTTGATCACCCTTCTATGAAAAATCAC
A01:14M15M:377751:	CCTATACGAAGAATCACCAAAGACGATATTTTGGGATTAAACTCGTT
A01:14M15M:404951	ACCCGTATTACGACCAACATCATGTAAGTTACTTCGTTTAGTTAAAT
A01:14M15M:378051:	TGGAGCAACAATGGAACTGTGTATAACCGCCCCTAAGGTTAAGCCTA
A01:14M15M:393601:	CACATTCAGATGGGAGACGATTTCATACAAATGGGTATAACTGTAAG
A01:14M15M:378201:	ACAAAGCCCAGTTACTAAAGCAATTTGTATTTTGTACTTGGATAACA
A01:14M15M:393751:	TATAATGTATTCAGGTAAATCCATTACTGTACAAGGATGACCAACCT
A01:14M15M:378351:	CCACGTACGGCCAGCCCTTGTTAGTAAATTCTCGTTCATATATATGT
A01:14M15M:398351:	TGTCAAACGTGTCTCCATACTCGATGTTAATTATAACTTTGATACTA
A01:14M15M:379051:	GGTGGTCCAGGACTCGATCATTAAATAAAAAGTTTGGTCTATATTGT
A01:14M15M:420751:	CGACGGTTCTAAACTTGGACTAGCGTCTAACCTTGCACCATGGCTCA
A01:14M15M:421101:	CAGGGAAGATCGATCAATGACTTCGACTTAAAGGGAAAGAAGTATCC
A01:14M15M:421451:	AATTCCGGTCGCAACCTTAGATGATACCAACTATGATGCATTCAGAT
A01:14M15M:422651:	GTCCCAAACTAAGTCTTAGGTTATGATACAAACAGGGTTTAACTTCT
A01:14M15M:422701:	ACTCTAATTATCACCCTTCCCCGGAAACATTCCTTCCATGAATTCGT
A01:14M15M:422801:	TTCTTTTTTCCTGCCATTATGAAAGACAACTTTGTTCATTCCCTTCT
A01:14M15M:422951:	CTTTCCTCTTCCTCTGTGTCATCTTCACTGCTTGACCGATTCCTGAG
A01:14M15M:423051:	ATTATGATACTGATTTCTCTAGCCATACCGTTTACGTTTCTGCTTTT
A01:14M15M:423351:	ACTCTAGTACCTCTCACAAGTTACGAGTTTAACAAGGGCTTGTTTGT
A01:14M15M:423501:	TTCTAAAGATACATGCCTCATAGCTCGCTAACCCTTCTATTTCATGA
A01:14M15M:423651:	TAATATAAACCTTTGCCTGACATAACTTCCTTTTCCGTTCTCCATCT
A01:14M15M:423751:	GAAAACAAGCTAAGATGAAGTATCCATACACCAGAATTTTATACCTG
A01:14M15M:424201:	ATGTGGTAAAGGATACTCCTTAAAAAGCTTATCATAGTATCGCTTCA
A01:14M15M:424301:	CTTTGCAAGTAAAAACCCCAAGATTTATGAGGAAACATACAGACAAG
A01:14M15M:424451:	CCATACCGGTAACCTTCTCTAAGTGTGTCGTGGTCGGTTTTAACCGG
A01:14M15M:424551:	TATACTATGAGACTCCACAACTAGTAGCTATTCCAAGGCAACAAAAA
A01:14M15M:424651:	GACTGTAGCCTCCTTCCAAGCTCAGAGGAGAAGACTGTTCATCAACC
A01:14M15M:424801:	CAAAAGAGCAAGGAGAAAGAAGGGTACCGTAGTCTTTCAAGAACTTC
A01:14M15M:424951:	AGGGAGAGATAGAGAAGGAAGATTTAACTGCTTGCGTTCTTCTCGGT
A01:14M15M:435351:	ATAATCAAATCTTAAGAGGGAGGTCACGTGAATGCCTTCTCTGATGT
A01:14M15M:435451:	GATCATCGAAACCTGTACACACCATTCTTATATTTCAACATCTCGCA
A01:14M15M:435651:	CCCATTCTTTAAGAACATCCATCCTGCTGTGTGATAACGGGTCTAAT
A01:14M15M:435801:	AAAAAGATCAAGTGACTTACAGCTGTTTGAGGCGCATGTTGTACTGA
A01:14M15M:435901:	TATTTGATCAACCGGTATCAGGTTTCTCCTGCATCCAACTGATGAGC
A01:14M15M:449451:	CATATGTAGACCACCACTCAGCTGAAGAAACCAACCAACAACCAGTC
A01:14M15M:449551:	CATTGTGTCCCTAGCTCTGATAGCCAAGTTCCTTCCAAAAACTCCAA
A01:14M15M:436201:	TGAATATCCTTATCAGGAACCAACCTCTCGATGCAGTCGACCAGAAA
A01:14M15M:436301:	TGAGAAAGAAACCAGCACCATACAACTGAACATGTTGTTGCTGCTCC
A01:14M15M:449801:	GTCCTCCAGTACACCATGTAATCCTCCTTGTTAACCAGATCTCTCTT
A01:14M15M:436451:	CCATCCCAGGCCTCTTCTCAGAGCAAGCTATTTTCAAAACCCGCAGA
A01:14M15M:449951:	TCGTTCACCATAGCATCGCCTTCCAGAAGGCCTCATCATCGATGGTA
A01:14M15M:436601:	TTTCGTTCCACTCTGGTGAAGTAACCATCGCCTGCAGATTGGCCTTG
A01:14M15M:450151:	TCATTGCCGCAAGTGAACTTCCGCATAATATTCAAAACATCACTACG
A01:14M15M:436801:	GTTTCGCTTATCCAGCCAAGCTTCCCGAACTCCTCAAGCATGTTATC
A01:14M15M:450301:	CAAGGAACCCAATACAGAGATCCATACTCAACCATCAGCTTCTTCCC
A01:14M15M:436951:	ACGACGTGTGTACTGCCAACTTCTTCAACCACTTCCCTTAGCCGCTC
A01:14M15M:450451:	CAAGATAGTATCTCAGACGCGTCCACTGATTTCAGGAAGACTGTCTT
A01:14M15M:437101:	TTATGATCAGAGCTCAACTCCTCGACAAGAACGGAACAGCCTGTCCT
A01:14M15M:450601:	CACTCTTCAACTTCTCTAGTTGTTTCCTCTACACAACTCTTCAGTAT
A01:14M15M:437251:	TACCCTCCGGAGGCAATGGCATCGATCATCGGCTGGAGATTAGCAGA
A01:14M15M:450751:	TCAGCTCCGATACCGAACAGAAACCGTCCAACCGCCATGTGAACGGC
A01:14M15M:437401:	ACGCTGCTAATCGCCACGGGGACCAAATTGTTGTCCATGTCTGTACC
A01:14M15M:437501:	TTCTCCTGTAAGGCCTCTGCTTCGTTCTGCCCTCTTGCACGACTACT
A01:14M15M:437551:	GTACTCTCCGGCGAGGTGAAACCGTTGTTGGCATCAGACTGAACCAC
A01:14M15M:451051:	GCTTCACAAGGAGGCAAAGCAGGCAAAGACTCAGGCTCAGCTGAGGT
A01:14M15M:437701:	ATGCACTGCCGCAAGAAGAGCCTAACATCTTCGGGAACTTGGTCGCA
A01:14M15M:451201:	TTGATGCCAGCGAGATGCTCCTTGACCCTCGTGATACCGCCGCCTTT
A01:14M15M:437851:	TCGCCGTATTTGTAGATTTCACAGTGCTTCCACGCATTGTCTTGCTT
A01:14M15M:437951:	TTTCATCGGAAGAAGAAAGCAAAAGTCATAGACTTTGTTAATGGGTA
A01:14M15M:438101:	CGAATTCTAAAACCTCTTCCCCATGCAACACCGGCCAGATAACAGAA
A01:14M15M:451601:	ATGTAAAGAAGAGGAACAAAACGAACCTTTTTTTTGGTTGCAGGTTG
A01:14M15M:438251:	GAGGGGAGATTCCGGTACAATTAAGTCGGTTCTGGAGAATAGGAAGG
A01:14M15M:451751:	CGGAGAGAATCGGAGGAGGAGAGTGATTGGGAAATGTAGCCGGGCCG
A01:14M15M:438401:	GGTTTGGCAGCTTTTCTGGTTTACGATGAGACGAGATGTCCTTTATA
A01:14M15M:438601:	GATCGGAACCTCGTCTTCGTTGTTTGTCTCTGATCTTGTTGCTTCTC
A01:14M15M:438701:	AATTTCTGTGGGAGAAACGTCTTCTTGTCTGAAAAAGTAAATCAAAG
A01:14M15M:438751:	GATATACTTTATAGACACTTTTTCTTGCTTTCGTTGAGGCATTTCGT
A01:14M15M:438851:	CAATCGAAGCCTTGAAATGGAAAAGCTTATTGAGAACCATCAGTTTG
A01:14M15M:438951:	TACCCTCTAGATACCATCAAAACCATTATCCAGGTTTCTTTCTTCTT
A01:14M15M:439051:	ATGTCTGCAATTGAAAATGCAGGTTGGTTCAGGACCCAGTAAGAAAC
A01:14M15M:452501:	AAGTCGTCAACAGAGTTTTCCGCTTCTCTGGCTATTCAGGTTTGCAA
A01:14M15M:452601:	TGTGTCTTTTTGAACAAAATAGGTTTGTACAGTGGTTTGGATGGTTA
A01:14M15M:439301:	GTCTATGAGATTCTCACGGCTTTTTATAAAGGTATTACGCAGATCCA
A01:14M15M:453051:	GCAGTATTCAAATCCATTCATGGGTTTTACATTCAAAGTTGGTTCCT
A01:14M15M:453101:	AAAGTTGCTAGTATGAACTTGGTAGTTGAAATTTACCCCATCTTGCT
A01:14M15M:439901:	GTGCAGCAGAAACAGTGATGACTTCTCCATTTGAGCTAATCAAAGTC
A01:14M15M:453351:	AACGCTGCAGCTGCTGCAGAAACCGCACCGGTGATTTCACCAATGAT
A01:14M15M:453451:	TGAATCTGTTATCCGTGTTGAACCATAAACACCCAAACATGACAGCC
A01:14M15M:440151:	GATGACTGGAACAGGTAATCCACCATCAGCCATGGATGTTAAGAGAC
A01:14M15M:453901:	AACACGTGCACAGTGTGTAATACTGCCAAAGGTTAAAAAAGAAGATC
A01:14M15M:454101:	ATCCATCCTACAGACAGAAACTTATTGTTCCGGGGAATTGGGATTAG
A01:14M15M:454351:	TATGCTTCCAGTTATACTCTTTTGCTGTGAGCATGTAACATTAACAT
A01:14M15M:441051:	CAGAATGAAATGCTTGTGCAGGTTGCAATATAAGTTCAGTTTCAAAA
A01:14M15M:454651:	TGATCAAAGCTACTTAGAATGGAACTCTTGAATCAAACAAAACTAAC
A01:14M15M:454751:	ATCATTAAAGAGTAATCAAAATGCATAGAGAATCAAACTCCAGAACG
A01:14M15M:441601:	AGTGATTCCTTCAGAACCTGAGTTTGGTAAAGAACCATCTGTTCTTC
A01:14M15M:441801:	TTGATGAAACACTTAACCCTAGATTTCTTGGCCGTCTTCTTCGCCGA
A01:14M15M:441951:	GCCTTCTTCCCGGCGTATCGGCCTTGGAGGAGGATCACTGCCTTGTT
A01:14M15M:457051:	AGTTGTAGTTTGGTCTTCCACACATCCAAAAAGTAGTATGAGTAAGA
A01:14M15M:457151:	ACATTTTAAGCCTAATGATTTTCAATAGCATGGTCATCCCGGATTTG
A01:14M15M:457251:	GGGATTTGGCTCAAGAACGTGTGTTGATTTGTCCAAAAGACTAACTT
A01:14M15M:457451:	TTTATACTTCACCCATGTTCACTCAGCATAATTCGCCCAGGTGTAAG
A01:14M15M:457751:	TGGCCGAGGCCGAGTATATCGTGTCCGCGGCAATATATGTTTACAAT
A01:14M15M:457951:	GTTTCAACTGAGGCATGACATAAAGTTAAGTGGGAAAACATTACTGG
A01:14M15M:458101:	AGGATAAAATAAACATGAACACATCCACTTGGCTTGTAAGTATACAT
A01:14M15M:458501:	AGGGTTTATTCGTCGGGCAAAGGTCATGTGTCAATGTTACGCACAGA
A01:14M15M:458651:	TGAAACTCTTTTTTTTTTCTTCAATTTCCCCGGAAAATCAGGAACTC
A01:14M15M:458751:	GTTAGAAAAGCAACCCGCAACTCTAGAGCTATAGCTGGTTAGAAGAG
A01:14M15M:458851:	GCCTTTTGTATTATTGTGTGTTGATCATGGAGAGATCTGATTCTAGA
A01:14M15M:459151:	TTGCTGTCTTGTGCAGGTAATAATAATAGTACACTCTTTGACGCATC
A01:14M15M:459251:	ATGATGATGCCGATTCTGTTCTCGGACATGCCGATGACGGTGATGGG
A01:14M15M:459401:	CTACTTGTGGTTTCAGGGTGCAGGTTTGGGATCATTGTCTGAAATGG
A01:14M15M:459551:	AAGATAGCTTTTCGGAGCTTCTTGTTCTTACTTGGTTGTCTACTTTT
A01:14M15M:459651:	CCCAAACACCCTGGAGTAATTGGGGACAGAGGATCAGGTTCCTTTTC
A01:14M15M:459951:	GACATAGGTTTTTATCTCCAGGTTCTTCTGCAACAGATTGGACACAG
A01:14M15M:460051:	CGAACCTAGCTGGTCTTCACAGCCACAACAACCATCAGCTAACCCAA
A01:14M15M:460201:	TACGCCTGGAAACAGATCTCAAATATCTTCACCGAGCCATATCCATC
A01:14M15M:460301:	GCTTTCCATCTCTCAGGATTGTCACACGGACCACCACACTACAACAG
A01:14M15M:460401:	CTCCTCACTGGGTTACTGACCCTGGCCTTCTTCTGCACGGTGATCGC
A01:14M15M:460551:	AGCAGAGACAATCTCTAGCTCATCCCGCCGCGTTACAGTCCCAGCTC
A01:14M15M:460701:	AGGCATCTCTCTCCAGCCAGAAAAGCGAAACCGGACTTCAGTTCAGA
A01:14M15M:460801:	CAACTCACACAGCAGTGACCCTTACGTCAACGATTATTACCACCAAG
A01:14M15M:460951:	AGATCAGCAACAACCGCAAGTCCACGTGGATGCTCTCGGAAAGATCA
A01:14M15M:461051:	GGCTCTCGTCATCATCTGGAGCAGGAGCCTCTTGTTGCAGCTAGAGT
A01:14M15M:461151:	CTCTCCAGTGCAACCGTCCGCAAGACGGTGGCTCTCAGCTCGTGAGA
A01:14M15M:461301:	TAGCGACTCTTCCCAAGGGGAAGAAACTGCTCACAAAGTATATTCAG
A01:14M15M:461451:	TTGCTAACGCGGTTACTGTCTGTGTCCAAGCGATGGATCTCCGAGCA
A01:14M15M:461551:	TCCGATAGGAAGTCCCTCTGGGGATGGAGCGTCTGTTGTGTTGGTGT
A01:14M15M:461751:	AGGTAGCTATAAAGAGGGAGATGCCTGCTGAGCTTTTGCGTGCGAGC
A01:14M15M:461851:	AGGTTCTTCACCACCACCTGTGAGCGAGTTGAAAACCGGTGCAAGGG
A01:14M15M:461951:	CGAAAGAAACTGTGAGAACATGGGCTGGGTGTAGGAATCTTTCACAG
A01:14M15M:462101:	ATTGAAAGTGGGAGTTGGTAAAACCTAAGTGAAATCCCGGGAGAGCT
A01:14M15M:462201:	GGAGGCTAGGTGTTTGTGACTGTACAGACTGATGGTGAATAGTGATG
A01:14M15M:462301:	GGTCTTTTGTTGTCTTAGCATCTTGTGGGTCTGTCTGTGTTGAAGTA
A01:14M15M:462401:	TGTTTCTGTTGAACTATGTCTCGAAACTCCGGTTCGTACGTCGTATG
A01:14M15M:462701:	ATTTATATGGTACAAAAGCGTAAGCTCATCCTCTAAGCACAAAACCT
A01:14M15M:462801:	TAATCGCGCACATGGTTAAAGGAAGTGGTAGGAATTAAGCCACGTGA
A01:14M15M:464101:	TTTTTTGTGAAACTCCTTTATTACAAGAAAAGGACAGAGAACCAAGT
A01:14M15M:464251:	ATCAACCATTACAATTTCCCAATGTACTCTTTTTTACTCTGTTGGTC
A01:14M15M:466151:	GAAGCTTGAACGGTGACAAAATAGCATGAACATACCCTATATTTCTG
A01:14M15M:466651:	TCTTCCCACAAAACCTTCACTGCAGAATGGCAGGATTAAAATAAGCA
A01:14M15M:466751:	CCATACAGTACAAATCCCACGAGAACAATGTGTCAACATGAGAAGAA
A01:14M15M:466851:	AATGTTGGGGCATAAGGAAGAACAGATGGTGAGGTTTTGGCTCAAAA
A01:14M15M:467051:	ACCATTTTTTCACCTTACCCGACCAACAAAAACAAACCAAATTCAAC
A01:14M15M:467151:	AGAACAAAAAGGTTGTTTTATTGTGTTACCTTGATATGAGATGGAAC
A01:14M15M:467251:	GTCCAGGCAATGCATCAGCCAAACCAGGTACATGACTGAGTATCCAA
A01:14M15M:467401:	GTGTCAGAACAGGCCTAAAGAGTAAATATCAAATCTCTGACAAGTTT
A01:14M15M:467451:	CACCTGTATGTGAGTTTTGATGATCGCCTTTCCGATTAAAGTGGCCA
A01:14M15M:467551:	TCAAACAGAGGATTTGGGACCTGCATTCAAAACAGAAGCAGTGTTTA
A01:14M15M:467751:	TGCATTTTAAAGCTAAATAGATAGAGAGAAGCAGTATATGAACCTGC
A01:14M15M:467901:	GATCCAGCAGCTGATACCATTAGAGGAGGACCAAATTCTGAACAAGA
A01:14M15M:468001:	ATTTTAGATCAATACGGCCACATTGTGTTGCTTTAAGAGTGAACAAC
A01:14M15M:468401:	GAAGGATGAACCAACCTCCATGAGCAAGCAGATACAATACAGATCGC
A01:14M15M:468801:	GGTCACCACCAACTACTATATCTTAAGAGGATAACGAAAAGGATTTT
A01:14M15M:468901:	CACGATGGGCAGTAAGAGAAAATAAATATATAAGATTGCTTGCAAAC
A01:14M15M:469051:	ATAGAGATTAGAGAGTTCAAGACTTTGTTGTAGAAAGTCAGATATGG
A01:14M15M:473001:	CCGTCATCTCCACGGCTCCTATCGCTGTAAAACCCACCCGCCCATTT
A01:14M15M:473101:	TAATCTCCGGGTAATCATCGTCCGTTAAAAGCGAAGTTACCGGTAAA
A01:14M15M:473201:	TGGGTTAACTATTAGCAGCTCAACCGGTTCTGAGCCCAGCCGAACTC
A01:14M15M:473501:	CTCGGAGAAGAGGTTTTGTTATGAACGTCGGTTACTCTTACCGTTTT
A01:14M15M:473601:	AATACGTCAGGTAATGGTCGTGGTTAATGGCAATGGTGTTTTTAGCC
A01:14M15M:473701:	TGCTTTGACTTCCAAAACTCCAGTCAAATCCACCTATGATTAAAATA
A01:14M15M:474651:	TTACCCCAACTCTGATGGCTCCATTCTTTTTAAATTCCCAATCAACG
A01:14M15M:474851:	GATTTAGAAGTTTACCACTTGTCCTGGAACATTAATCTCGGTGTGTC
A01:14M15M:474951:	TGTTGAGCTGTCCCATCAGGTCCCGCCACGTATCCATCCAAAAACGC
A01:14M15M:475051:	AACCGAACTCTCCTATGTCCATGAACGTACGGAAGTACCAGTCGTAT
A01:14M15M:475151:	TCTTCTGAACCTTTTGGTTCTTGTGTCAAGAACCGAAGCGGTCGATA
A01:14M15M:475251:	TTTATTTTATTGCCTAGAATCTTGAACCCTGTGTCGGAGACGTTGCA
A01:14M15M:475351:	GGATAGGCTTTATGAATCTGTCGGAGTATTTCACGACTTTCATTGAG
A01:14M15M:475501:	TTTCTCCGTACCAACCAACGGAGAAAGGGATGCAAGAAACCTCCGAG
A01:14M15M:475601:	AAGCTTGCTTGCTTTGAACAGCTCTATGAATGTGAATGAAGGGAAGC
A01:14M15M:475701:	ATGAGCTCGTGGGTTTGACCACCGGCTCGAACCACCACGAGTGAGCG
A01:14M15M:475801:	TCTTGTTTGGTTCTTCGAGATCGAGGTAGTGAAATGTGAGATCTTTG
A01:14M15M:475901:	AGGGGTTAAGGGATCGAGTGGGTGGAAATGTAGGCCAAGGTTGAAAA
A01:14M15M:476001:	TTTGTGGTCAAATTGAGTTAAGACTGAGAGAAAGTATATTGATGGAG
A01:14M15M:476101:	TTCGATGTGCGCCTACATAAATATCTTTAAATTGTGTAAGCTGTCTT
A01:14M15M:476501:	ACGTGACATATTATATAGTCTTCCTTCTCCATTAAGCCAGCAAACTT
A01:14M15M:476701:	ATCTTAAGTCCTGCGCTTAAACTTCGTTTACGTTACCGAAATTATAC
A01:14M15M:481601:	TTAACAAGATCACATTTTCTAAAGGAAGACTTCCAGAATGTTTGGAT
A01:14M15M:481751:	ATCACCTTCAGGGTTTATTTATGCCCCTCTTAATCTTTAGTATTATA
A01:14M15M:481851:	ACCATTTAATTGTAACAATACGGCTAGTTTCAACAGAGATAGCTTCA
A01:14M15M:482101:	TGACTGATTTAACATTAGATTTCAGATTGAGGGTGCCCAAGGAAGAG
A01:14M15M:482301:	TTTCCTGGTGTAAAAAACGACTAACAGCTAAGGGAAAAGATAAATCA
A01:14M15M:482501:	TTATGCTTATAGGCAGATATAGACGTGATGAAAGAAATTGGGGTCGA
A01:14M15M:482601:	TAACTTCTGTAGATTGAAACGTCCTGCCTCATTGAAAATTATGTAGT
A01:14M15M:482701:	TTGGTTACTACAACAATCTCATAAATGGACTTGTATCGAAAGGTATA
A01:14M15M:482801:	ATCTTTCAAATGGGTTGTATTGCAATTTCCAGGCATTAAGCCATTCG
A01:14M15M:482901:	TTCTTGGACCATCAGATTATGTACCCTCATCTTCCTTTTCTTTCTTG
A01:14M15M:483001:	TATAAATTGTGTCTAGCGAGGACTTCAAAAGTTACGCGGAAATTTGT
A01:14M15M:483101:	CACTATTCCTACACGAGGCTATGCAACTGGTACAGACGCACCTGGAC
A01:14M15M:483201:	CCTTATATTGTTGCGCATCATGTCCTACTTGCTCATGCAACTGTCGT
A01:14M15M:483351:	TACAGCTAATTCAAGCAGGGGAAATTGGAATCACAATGATAACGAGA
A01:14M15M:483651:	ACTTGTATCGTGACCTAGACCCACATGGAGTCTCTTCATCCACTCCA
A01:14M15M:483801:	CAAAGGGACACTATCCATTAATCATGAAGCAAATATTGAAAGAGAGA
A01:14M15M:483901:	TATTGGAGTCAACTATTACATGACACAGTTTGCAAAAGCTGTTCCAC
A01:14M15M:484051:	AGATCATAGTTTCTAGGGTTTTCTTGTAGATGTTAATGAAGACGGTC
A01:14M15M:484201:	GCCATTTGGAGATGTCTACTACCGTCCAAGAGGTATATTAGATGTAC
A01:14M15M:484601:	TTCGAAGCCTTGATAGCAATCGGTTGGCCGATGAAATCAAGAACGAT
A01:14M15M:485051:	TAACAGGAATGGCTGTCAAGTGAAGGGATATTTTGTTTGGTCTCTAG
A01:14M15M:485151:	ATTGACTTTGCTAACATTACACATGATAGAGATCTGAAATCTTCAGG
A01:14M15M:485351:	TGCAACCACGTCAATTTGTACAGAATGTGATGCGGTTTATTCTTAAG
A01:14M15M:497651:	TTGGCGTGTCTCTAAGAGCATTTTCTAGGGTTTTTTTCAAATATGAC
A01:14M15M:504301:	ATTCATTTGTGGCCTAGGAGGCAGCCATAACTGAAACGCAGACAAGC
A01:14M15M:504401:	TAAACATATCTAAACATGTGAGTTTGTGAGACCGGATTTTCCAAAGC
A01:14M15M:504501:	TACCTAGCGAAAAAGCATCAGAATGGAGGCTTCTCAAGAACTTCACC
A01:14M15M:504701:	AAGACAATTTCCGGCCACAAAAGAACGACATAATCCTCGCTTCTTTA
A01:14M15M:504801:	AGAAAAGTACCGTGAAAATCCCCAAATAATACATCCTTTGCTCTCAC
A01:14M15M:505001:	CATGCAAAATCGTCTACGTGTGTAGAGGTCTCAAAGATACGTTTGTC
A01:14M15M:489151:	GTTATCTTATACGGATCCTACTGGGAACATGTGTTGAGCTACTGGAA
A01:14M15M:505301:	AAGAAGAGAGTGGATCAGCGGAGGAGATCTTGAACTTGTGTAGTTTG
A01:14M15M:489551:	GATTAATAAAATGGGGCGATAAGAGATGGTGTTGATTCTAATGTGTT
A01:14M15M:505451:	ATCTGACTCCTCAAATGGCGAAAAGGATTGACGAGGTTGTTGAGGTT
A01:14M15M:516651:	AATAGAGAAGCTTGTATTCAAACCTCTTAATGTGATCTACTCTCCGA
A01:14M15M:516701:	CTTTCCCCTGGTGGATTGTTCACTTCTTGTAGCTCAAGTCATCAAAA
A01:14M15M:522001:	TTCTGTTTCTTTCTTATAAGTGTGCCTTGCTCGAGCATCGAAAGCGT
A01:14M15M:522151:	GTCATTACGACGTCGTTGCGATTAAGCATAGGCAAAAACTAAAAAGT
A01:14M15M:522251:	CTCAGCACCAAGAATCTTTCTCGGCGATTTTCTCTTTTCCGATCAAT
A01:14M15M:522451:	TAAACCAAACCAATGGGTACAATTTGGGTCGGTGACCGGTTACTGTA
A01:14M15M:522551:	AAAACAACAACTCCCGCATCAACAAACAACAATAATGAGTCATCTCT
A01:14M15M:522601:	TCCTCTTCTTTCGACCCTAAAAGCTCTCTCGTCTCCTTTTAATCAAA
A01:14M15M:522701:	GTATCAATCTGTTAGATCTAGGGTTCTTCGCCGTGGGGAGATTGATG
A01:14M15M:522801:	GGGTGTGATTACATTGTGCTGAAATTGGAGTGGTGTACATGGAGAGA
A01:14M15M:522901:	CTTGATTCTCAAGAAGAAGAGCGATGGGCTTGGTGACTTTTCTTCCT
A01:14M15M:522951:	CGGAGACGAGTGATTCCGAGTCTAGCGATAAGCCCCTCATGGCACAC
A01:14M15M:523051:	TTGTTTTCTTGGAAATAGCAGAGAGTGGAAGGAGAGGCATAGATTAG
A01:14M15M:523201:	TGGAACTGCCTCTAGTAGTAAATATTTAGATATTGAGAGGAAGAGAA
A01:14M15M:523301:	CCAATCAGGGTTCAGGGGAAAAATGGTGTCCTCAAGGTGATGCCCAA
A01:14M15M:523401:	CTCAAAAACCTGGGGAGACTGGTAAAATACGTGTCGCTATCCAGTCG
A01:14M15M:523501:	TGGGTTGAAAATACCACCCATGAAAAGCAAGGGCCATGACCAAGATT
A01:14M15M:523601:	AATGTTTTGAAGATTGAAAGAGATAAAACTCTACCTGAGGCGGCAGC
A01:14M15M:523701:	AAAGATTACGTGAGCGAATTAGAGAAATGTTGCTGGAAGCAGGGTGG
A01:14M15M:523801:	AAGCCCCCGGGGAACTGCATATTGGTCTATTATCAAGGCTTACGAAG
A01:14M15M:523901:	GGTTCCGCAGCTACTCTGATCTCGGATGAGATACTCAGTCAGTTAAC
A01:14M15M:524001:	CCAATGATAGTGATGGACAAGGAAGTCTTGGAGATTTTACAGCTCCT
A01:14M15M:524151:	CAGGATCTATCTGGTTGACGTAACTTGGTTATAGACCGTGGGAACAT
A01:14M15M:524301:	GTCGATGTTTCATCTCCTGGTAAACCTTGCAGCTTCATGATTAAAAA
A01:14M15M:524401:	CTCTGTAATTTTAGCATGTTGAAGGTGATCAGTGTCATTCTCTTGTT
A01:14M15M:524501:	GGATGAATCGGCAATGACTCAAGGAGTCTTCTTCACGTAGCTTCTAA
A01:14M15M:524651:	CAGAACCAACGTTTTGACCCACAGTAATGTCTTTCTGAATGAAATCA
A01:14M15M:524801:	TTTCCGATTTTGCTGGTGCAAATCATAGGTGGTAAACTAAGCACTGC
A01:14M15M:525001:	ACGAAGGAGAATACTACATTGAAGACCCTAAAACAAAAGGATTTGTG
A01:14M15M:525551:	TTAGTCGTTAGCTGTTGCGAGCTGTAGAGACAAGAGCTCTTCCTCAG
A01:14M15M:525651:	TAGCCACGTTCCACCACATCTTCGCTAAGCATCCCGTCGCTCTGATC
A01:14M15M:525751:	AGTCGTACGGCACGTCCATCCCCGACTCAAGAGCCTTCGATAAAATA
A01:14M15M:525851:	CACTTTATACGAACGAGCAACCACTCCTCCGACGAGAAAAATCCGGC
A01:14M15M:525951:	AGATAAGGTTTAGGGGGAGAGATTGTGGAGATTTGAGGGAGAGGAAG
A01:14M15M:526051:	TATACTTGTTGTGGTGACAAAAGGAGATAAGGTGCGGATGATAAAAC
A01:14M15M:526151:	ATAAACCGTCTTAGACCTGATTGAACCGGGAAGCAATTTTGGTTAAC
A01:14M15M:526251:	GACCAAAGATAAATTAGAAAAATCCAAAGCATGTGGCGATTCTTAGC
A01:14M15M:526351:	CATTCCATACGTTCTCTATTCTCTTCAAACGTACGTTATTGACTTTT
A01:14M15M:526501:	AAGCTAATCTCGATGTTAGTACTTCTAGTGGTTTAAGTCATGTTGAG
A01:14M15M:526651:	TTGCTAATGATGTCACCGAAGTAAGCTCTCTCTCTCTCTCGATATAT
A01:14M15M:528001:	AGCGTCAAAGACAGGTTTTCTGTTTTTTTCCCCCCAAGTCTCTCCTT
A01:14M15M:527001:	GATGCAGAGAAAAAGGGTCTGATTAAACCAGGAGAGGTTTGTTTGGA
A01:14M15M:528301:	CACGGCGGCTGCCAAGGGATACAAGCTTATCATTACCATGCCAGCTT
A01:14M15M:527251:	CTTAGCTTTTGGTGTTGAGTTGGTTTTAACTGACCCGGCCAAGGGCA
A01:14M15M:528551:	ATGTTTCTGTCTGTTATTGAACTTTTGACTGTCCAATTCCAGATCCA
A01:14M15M:527501:	AAAGGCACTGATGGTAAAATCGATGGCTTTATTTCTGGGATTGGTAC
A01:14M15M:528701:	TATCTTAAGGAACAGAACCCCAACGTTAAGGTGAAAAGCTTCATATC
A01:14M15M:527651:	ACTCTTGAGTCTAAACTAATTCGATGGCTTTGTTTTCTCTCTTTTGT
A01:14M15M:528851:	GTGCTATTCTCTCCGGTGGAAAGCCAGGTGAGTTTTGATTCCCTCTC
A01:14M15M:529351:	AACAAAACGTGGGCTTCACTAGGAGAGGATCAGTTGTTTGTAGGGCT
A01:14M15M:529651:	GTTACAGGCGGTGTTCCCAAGTTTCGGAGAGAGGTACCTGTCGACCG
A01:14M15M:529751:	ATAGTCTCTGCTGTAAAAACAAATCTCCATTTCTTTGATTTAGAGAC
A01:14M15M:529901:	TGTGTAAACAAAACTCTATTTCTTCTTGTGAACGAACGAACCACTTG
A01:14M15M:530051:	ACACAAATTTAATAAGGTAATGCTCAAAACGGAGTGTGATTATGATC
A01:14M15M:530151:	AACACCTTTGCCGATGAAGACACGATCAGAGAGTTCAGCCAAAAGGA
A01:14M15M:530251:	CCGGTAGTCCCAACCACTTTCTGAAACGCCGGCCACTCAATCTCCCT
A01:14M15M:530351:	CCGCTTTCCTCTGCTCCATCGCCGCTTTTATCTCTGCTCCCAGCTCG
A01:14M15M:530451:	CTCCTGCTCCGACTCAGATCCAGCTGTATCTCGGCTCTGCTCGATAG
A01:14M15M:530601:	TAACCTTATGTTTATTCCGGTGACCGGCGGCGAGAATTGTGCGGTTA
A01:14M15M:530901:	TGTATCTGCGAAAGCAGAGACGATGAACTTGTGAGTATGTTTAGGAT
A01:14M15M:531001:	TCGTCTCTCGTCGGATCTCTAGCTTCCACCATCTCTCTCATCGACCT
A01:14M15M:531101:	CGTCGCTTAAAAGCTTTGACACTACGGTGTAACTTTCATCTTCGTCA
A01:14M15M:531201:	TCCACCGGTGAACAAACTGGATCCAGTGTCGCCGGATTTGGGAGTGG
A01:14M15M:531301:	ACAGAGAGGTGATCGTAGAGAGAGTTGAAGTTGTTGATGAAGATTGA
A01:14M15M:531401:	TCGGGGAAGAAGGAATCGACGGTGATACAACACCGGAGGAGGAGAAG
A01:14M15M:531551:	TAAGAGGAGGTCACGTAGTGTATGCAACGTCCATAACGTAGCTGGAC
A01:14M15M:531651:	ACGCGGATTTACACCAAGTCTTTGATGATCATATTCCATTGCATAAT
A01:14M15M:537201:	GACGACTTCATCCACGGCTGCATCTCCAGTACCTAAATCCTCTCCAT
A01:14M15M:538101:	CTGCAAAACACTAGGCCACATCAAGCAACTCCACGCCCACATCCTCC
A01:14M15M:538201:	TCTTCCTCAATCAATATCAACTACTCTCTCTCCCTCTTCTCATCTAT
A01:14M15M:538301:	GTTCCGATGAACCTAGAGCCACGATCCTCTTCTACCAGAGGATCAGA
A01:14M15M:538401:	CGCCAAAGTCTCCGCCTTTTTCGAGGGTACGGAGCTTCACGGCCTTG
A01:14M15M:538551:	AATGCCCCAGAGAGATGTTGTTACGTGGAATACTATGATTGTGAGGT
A01:14M15M:538651:	TACTTTCAAGCTTGTTTGCAGGTATTGCCGATGTGGATTTTTAGAAG
A01:14M15M:538751:	ATGATTCTCTGTAACATTGTCTCCGCATGTGCTCGTTCTGGGAATAC
A01:14M15M:538851:	ACGCTCATTTGCTGACTGCTCTTGTAACCATGTATGCTGGAGCAGGC
A01:14M15M:538951:	TGTTTCGACCGCCATGGTTTCTGGGTTTTCAAAAGCTGGGAGGCTCG
A01:14M15M:539051:	ACGACGATGATCTCAGCTTACGCTGAGAGTGATCATCCTGAAGAAGC
A01:14M15M:539151:	CATTGGGGAGTGTTGTATCAGCTTGTGCGAGCCTCGGTGTTCTGGAA
A01:14M15M:539251:	GACGGTAAACAATGCTCTCATTAACATGTATGCGAAATGTGGAGGTT
A01:14M15M:539351:	TGGAGCTCTATGATCAACGCCTTTTCTATGCACGGGGAAGCCAATGA
A01:14M15M:539451:	TTACTTTTGTAGGAGTGCTATATGGTTGTAGCCACTCAGGGTTAGTG
A01:14M15M:539551:	GAAGCTCGAGCATTATGGATGCATGGTGGATCTCTTTGGGCGTGCTA
A01:14M15M:539651:	GTTGTGATATGGGGATCACTGATGTCGGCTTGTAGAGTTCACGGAGA
A01:14M15M:539751:	ACGACGGGGCGCTTGTGTTGATGTCAAATATCTACGCGAGAGAAGAG
A01:14M15M:539901:	TTCTCATTGGTGACAAAAGGCATAAGCGATCAGATGAGATTTATGCG
A01:14M15M:540001:	TGGTAGTGTTTTGGTGGATGTATAGGATTAGGAGGAAGAAAAGAAGG
A01:14M15M:540151:	GGATTGTCACAAGTTCTTCAAGATTGGCTCTCTAAAGTGTATGAACG
A01:14M15M:546201:	AGGTTCAATAACATTGCATGTCACTATTTGTGTGTTTGAACCAATGA
A01:14M15M:546401:	TAACGAGGGAAAAAGATGTGTAAACGCAACTAAGTGGTTTTAGATCT
A01:14M15M:546551:	CTACAAAACGAAACGTGGGCGTTGACAGCTTCCTCCACCGTCGTCAT
A01:14M15M:546651:	GCCATTTTCCGGCAAAATTAGCTTTGACCTTATTAATGTAGTTTGGT
A01:14M15M:546751:	TTCTGACCAATCTATATATATGGCTCCAAAACTGTTATGTAGTAACT
A01:14M15M:547151:	TAATTCCTCGATTTCAAGGTTTATACGGTGGACCAACTAACTTATAG
A01:14M15M:547251:	TGATTATTGCGAGAGTGCCACAAGTTGAAGTTTTATGTAAGTAAATG
A01:14M15M:547551:	GTTGTGTTGTTCTAAAACCTTCTAGTTTGAGTCCCACCTGGGAAGGA
A01:14M15M:547651:	AAGATGTACACCGTTTACGTTCTCAGAAGTTGGACCGACTTTACTGG
A01:14M15M:547751:	GTTGCAGAATCACTAGACTTTAAGCATCAGTCTGAAATGTTTGGCAT
A01:14M15M:547901:	GGTGTTAGTTCATTTCCGTTACCATTTTTGTTTTGGTGTCTCTAGCC
A01:14M15M:548001:	AATGTGCGTCTATAACTTCGTCATCATAGATATCTATTCATAGCATT
A01:14M15M:548101:	GTCTCTCGGCGCTACACCTGGAACTCAATGGACTCTTTTGAAGAATA
A01:14M15M:559251:	TCTAAATAATCGTTCAAGACTTCACGCCTTAAAGCACATTTATACTC
A01:14M15M:560001:	TGCATAAATCAAACAGATACAAGACACTCTTTGTAGCTACAAACCAA
A01:14M15M:560251:	GGAACTCCCACGAGATGTTGACCTATGTCCTGGAACTGTTTTTGATC
A01:14M15M:560401:	CCTGAAGTGTTGGATGGTCCTGTAGGCGATTTAACAGAAGAATCATC
A01:14M15M:560501:	GAAAATGATCCCCTCAAAACAGAGGTTATTATTACCGTTGCAGAGAC
A01:14M15M:560601:	TTATTAAAATTGATCCCAAGACGAGGGCCTCCACCTTTGAGAACTTC
A01:14M15M:560801:	CACCGCCATTGAAACTGTAAGAAACAGTAAACACATTCCAGGTTTCA
A01:14M15M:560901:	GTTTGGAGTGTTTGAGAGCAACTAAAAATAAATAAGGAACTCATGCC
A01:14M15M:561001:	TTGGTTAAGTTTCCGTCTGATTCACACATTAATGGAGGCTTATGTGA
A01:14M15M:561501:	CAGGATGTTCACAGAGTAGGGATTCTGGAAAGTGGAAAGAAACAGCA
A01:14M15M:561851:	TTTAAACTTTGATGCTTCAACCAACCCGTGGAGATCTAAGCAGAGAA
A01:14M15M:562101:	TTAAACAAAACCCCAAAGAATCAATAACCTCCAACACTTACAAGTTT
A01:14M15M:562551:	TGTGAACCGCCGACGTGTCCGCCGCAACAATAGCGAATCCATTACCT
A01:14M15M:562651:	ACAAGACGGGTAAATAAATTCTACAAGATAGTTAGGGGTAGTTTCGA
A01:14M15M:562801:	CTGGAAGCAACCTCTCGTTATGCTTCCTTCCCTTCTATCTCTCTCTG
A01:14M15M:562901:	GTACTCTGCTATTTCAAGGGACTGCAAAATGATTATTGAATTGTATT
A01:14M15M:563001:	AATGGCGTATTCTCTTCTTCGGATTCGAAAGGTTTCACCTTTCGGAA
A01:14M15M:563201:	AGCTGATAAGGCAAGTTTGTGGCGGTTTCACTTGGAACCTGAGTGTG
A01:14M15M:563301:	TCCTCTAACTACGACTTCACTGGCTCCGGACCTACCTCATCTTTCGA
A01:14M15M:563551:	CACACATGGTATCCAATTGCTCGGAGGAAGAAGCGTAAAGTCATTCT
A01:14M15M:563651:	AGCGTAGTTCTTCAGGTATGTGTCCTATATTAGAAGGTGACTCTACT
A01:14M15M:563751:	TATTGTGGTCCGTTAAGATTGTTGGCATGGGAGGTAGCTAAACGCTT
A01:14M15M:563851:	TGGAAGGTGCTAATCACAAATCCGTCACTGTTGAAATGGCTGATGTT
A01:14M15M:563951:	TTACTTTGGCCGAAGAAGAAATTCGACAATTAACTGTTTTGTGTTGT
A01:14M15M:564051:	GGTTTTCATTTACTCGTGCTCTACTTGGGATTGCAGCTAATGAACTA
A01:14M15M:564301:	ATGAGAGGCTTTCGCCATTAGTCCCTTTGAAGGTTCCAGTTCGGTCA
A01:14M15M:564401:	ATATAGGCATAAGGTTTGCAGTTATTTATATTCTACGCTCTGTTCTC
A01:14M15M:564601:	GTACAGCGCAGGTTTGAGACTTCACTGGATGGTCTAAGAACACATAT
A01:14M15M:564701:	CTACAGGCAACAAGGTTTAACGACGCGACCAATGACTTTGATGTGCT
A01:14M15M:564801:	TCTTCTCCACCCTTGAAAAATTTGATGGTACCGAGACCAGAGACCTA
A01:14M15M:564951:	AGTCTAGGGCAGTACTAAAGTAGGCTGGTGACTGGAAGTGTATATGT
A01:14M15M:565051:	ACATGGGTTTAGGCTTAGGAAAGTTTAGGGTGCTATAGCTTTCACCT
A01:14M15M:565151:	TATTTGATTCAGAGAGTGAATAAAGGGAGAATAGGTTCTAGTGTCTA
A01:14M15M:565251:	AGATTCCGTTCACAGTTTCCTGTTGGAGAAGTAACTTGTTTGCATAA
A01:14M15M:565451:	TGCTGGACTGTTTCCAACGTATGACCTCCTATCTAGATATTCGCAAG
A01:14M15M:565601:	AACTTTGGCAGGAACATTTCGTTGAAAATGCAAAGTTATCTTCTAAC
A01:14M15M:565801:	TTGCAAGACAAGTACCTATTTGTGGTCAGGTAGTAGCAAAGAACAAC
A01:14M15M:565951:	CGGGGATTTGCACAGGTAAAAAAGAAACTACAAGATGTTATGTCTTT
A01:14M15M:566101:	ACGCGTTGTGAAGCTCCGAGAGATACTTTCAGATGACACAGTGAAGG
A01:14M15M:576001:	AAACTGAGGAGCTGGCGAAAATTCAAATAATACATTTCCAGTTTGGT
A01:14M15M:569801:	TTCAACTCTCACAACAGTGTCGATCTCAGGATCGAAGTAGAAGAGGT
A01:14M15M:570151:	TGGGCCTGAACTTCTCAGACCTAACGTCAAAGCAAACTATTAAATAA
A01:14M15M:568751:	TCTCACTGAAATGCATGAGTGGATTGGCGGATACTGACGAGTAGAGG
A01:14M15M:577501:	GAGGCTGTGGTGAAGAGAAGAAGAACAGCTCACGATTTTTTACCGGT
A01:14M15M:577601:	ATCTTGGCGGCGGAGCGTGGAGGCCCATGTCTTCGATACGCAGCGAC
A01:14M15M:570851:	TGCGGAGCTGCTTTCTCTTCCGTTATCTGAGGTTTTCGGTAGCGTGT
A01:14M15M:569101:	TGTGTAAGTAGCCATGATTACAAAATAGCCTCACTCTTTTTACTCTA
A01:14M15M:575951:	GTTGAGCATTCCTTGGAGGCAAATAGATTGATCTCTCCTTGTCGAGC
A01:14M15M:569301:	AAAACAAGTGATTTTTTGTGCCACAAGATCTTACCGGAACCGTAGTA
A01:14M15M:569451:	TTTGTGATGAAAACATTCACGCCACAAGCATTTGAGAATCAGATGCG
A01:14M15M:569701:	TCAACTGATGAAACTATGCATAGAGCTTCACATCTTCAACATGGTCT
A01:14M15M:569851:	AACAGTTAATCGGGTACCACGATGACAACACAATCTCGTTGGTCCGA
A01:14M15M:569951:	AGCAGGTAACACAAATACACGCTCAGACCATTCTTGTTTCTCGACAT
A01:14M15M:570051:	TTTCCTCGGTTATCCTCACAGATAATCAAACCCAATCTACCACCGTA
A01:14M15M:570201:	TGTGTGGACTGATTAATAGATTTGTAATACAAAACACCATCGATGCA
A01:14M15M:568451:	CTGAAGCATTCTCCATGACATGTTTCCGGATCCTAACGTAAGAACTT
A01:14M15M:570351:	ATGCACAGCACCTTGTATTGTTTATCAACCGGATCATACCCAAACAT
A01:14M15M:570451:	TGGTGCTAGGGTTACAAATCGCCAACGATGTCTCCGTCTCTCCATCT
A01:14M15M:577401:	CCATGGACAGGACGACCACAACGAATTTCACCGAAACCACCAAAGGA
A01:14M15M:570651:	AAGAGGAACAGCTCACTGTTTGTCACGCGCGCGTGCAAGAGCTGCGG
A01:14M15M:570801:	AACGGTAGCCTCGAGAAGATGTCCACTATGACATCGGTTGGGATCGG
A01:14M15M:571051:	GTAAGCCCATAGAGCTCAAAACTAAGGCCCGTAAAGAGCAGAGTTTC
A01:14M15M:593101:	GATCAGGCTTAGGTTCAAATATTTGACAATATATTATGCCCACCCCT
A01:14M15M:603751:	TGGCCCGCGTCATTCATCTCTACCATTTATCTGCATAACCAAAAGTT
A01:14M15M:603901:	TACACGTATATCCGATTATGGTGAGTATTACTGCTTTAAGATCCAAA
A01:14M15M:604051:	ATCCCTCTTTATAAAATAGTTTATTACCTCTTCAAGGAACCGGAAAC
A01:14M15M:604201:	AATTCACCTTGATTTATGAGTCCATAAGTCAAAAGATATGCATGCCA
A01:14M15M:604401:	TTACGTTGGCTTTTTCTTATTGTCAATTTGTCATTGTGAGAAAGACT
A01:14M15M:604501:	CCTGACATTCACTAAAAGTTCAACAATCAACTTTATAATATCCCGAT
A01:14M15M:604701:	TGTGTTTAGGTCATGTGATGCGCCTCTAGTCACGTGATCTTGAACGC
A01:14M15M:605051:	GAAATTGTGGCATTGTGAATTACTTGGATTTGCAACATGTATATTGC
A01:14M15M:605151:	CAGTTGCATCTTTTATTTACGGGAGCGTGCATGGATTACAAATTTAC
A01:14M15M:605201:	TGTATAAAAAATTCAACCTAGTGGTTGGGCACTAAAGAGTGGTCTCT
A01:14M15M:605301:	GATCCTCCGACCTACCTAACTTATCAGTTGGGTTTATAAAATATCTC
A01:14M15M:605501:	CTTTTCATTTCACCATTTTAAGTAATTGCAGTCAAGGATGTTTGTAG
A01:14M15M:605701:	CACCGTACTAACATACCGAAATAGTTCACACTTCAAGTCTTCAAACC
A01:14M15M:605801:	TACTTATCGCGTGTTTAAAAAATGACTATAGGTAAATTCACCCGAAA
A01:14M15M:606401:	ATCGTCGTCTAGTTTGTTATTCCTTAAGTTCAACTTCTACTAGAAAC
A01:14M15M:606651:	TTGGATGCAGCATTCGATCATCGACGATTATAATATATACTATCTTT
A01:14M15M:609401:	CCTAGTTCGATAATTATTGTCTAGACAAACCACACGAACCAAACACG
A01:14M15M:609501:	GTTGGACGATCGTACACCGTAACTTGCGAAGTCAAACTAGTCATCAT
A01:14M15M:609601:	ATAACCTCAACAGTTCACCATAACATGGTAAACACTAGCGTACAGTA
A01:14M15M:609701:	TGTCATTTTCGTTAATTCCGAAACTACCCATGGGTAAAGAACATGGC
A01:14M15M:609801:	AACAAAACGTAACCCCACCGGCGAATTTATATTAAATTCTTGGGGCT
A01:14M15M:609951:	TTTTACTTCCCTAGCCCGGCTCAACATATTTTCAGTGACTTATGTGA
A01:14M15M:610051:	CTCTTTGTCTCTGTGGTGAATATATCGCTTTCATTAGGAGTTAGGAA
A01:14M15M:610201:	TATAATTAAACAGGTTCGTACAAGAATGTTTATGACAATGAAAGGCC
A01:14M15M:610401:	CCAGTTTCAGCCTTATAATATGCTCCTTTTCATTAATCTTTTTAGCA
A01:14M15M:610551:	GAAGCTTATAGGCGTGACTGACTATTTTCGATATACCTAATACGTAA
A01:14M15M:610701:	AGAATTCTAATTGCATGCAAACAAAAGAGAAGCAGTGAACAGAACTG
A01:14M15M:610851:	AAAAAATACACCAGTGTCCGTTACTTTATTAAAAGGAAAGGATCGAG
A01:14M15M:610951:	TATCCACACCTACTATTCACAGAGTGTGAGAGAGATACTCGTACACT
A01:14M15M:611051:	TGGGTCTGTTTCTGACAATTATCTTCATTTCCCGCTTCTGCTCTTGT
A01:14M15M:611151:	TGCGAGACTTTCTTTCTTCAGAGATAAGAGAGACAAAGAGAGTGTGG
A01:14M15M:611251:	CAGATCGAAACTCCAGTTTCCAAATCCAGATTCGAGGTTTACATTTC
A01:14M15M:611351:	CTTCTGTTGGTGTTATATGGTGCCAATTCTGAAAGTTTTGGTGTGAA
A01:14M15M:611551:	CAGTTAAGTTCAATGACACAACACAATGCTAACTGGTTTTAGGTTTT
A01:14M15M:611851:	CGGTTTCAGTTCACTATTGCAATTATGACCTGACATTCCCAATTCAC
A01:14M15M:611951:	GGGTTAAAATTCCTTAAGATTCTTAATTGGAATCTCTGATCTTTTGC
A01:14M15M:612051:	TTTTGGGTGGTTGTCTGAAAATGCAGGATTCACCAGTGTTCAATTAC
A01:14M15M:612151:	GTTTAGCACTCTCAATTTCACTTCCCCTCCTTCTGTTTTCACCTCAC
A01:14M15M:612251:	TCTCCTGATCCTACCATTCTTGTTCAAGAATCTCCAGACGATTCCAA
A01:14M15M:612451:	TCCTCCTAGAAAAGAGAATGGTTCTGCTTCTGAGGATGCTCCAGGAA
A01:14M15M:612551:	TTGATTGCAGATTCTTCTGAGTTCCTAATCTTCAGCTCACCTAATGA
A01:14M15M:612651:	CTTCAGTGATGATGCCAACAATGCAGCCTGGTTCAATAAATGAACCA
A01:14M15M:612801:	GATAGGCTGTTTCAGTCTTGCACCGTGGTATAAGAAGACGTTGTCTG
A01:14M15M:612951:	CTACAAAGGACTGTACAACCAATAATACCACTCATGATTACTCGTGT
A01:14M15M:613051:	ATTGGACCAAACAGAAACTGAAACCCGGGAAGATGTTCCCGTTGAAC
A01:14M15M:613251:	GAAGGAGAGTCATGTAAGAGATGTAACTGCAAAAAGTCCAAGTGCTT
A01:14M15M:613351:	TTTTGTGTGTTTATGAGTGTCTTGATGTTGATGTGCAGTTACTGTGA
A01:14M15M:613551:	TTTGGTTCTAGAAACCGGGGTAAAATCATTTTTCACCATCCTTTTTT
A01:14M15M:613801:	GATCATCTATGTATTGGTCTGACTCTTGGTCTGATGTTTCTTTGAAG
A01:14M15M:613901:	TGGCCGCAAAGATGGTTTAGCTTCTCTTCTTCTGACTTTTCATCACT
A01:14M15M:614001:	GGATCTGCCATTGTTGACATGGAAGCTGAACAAGAGGAGGAAAATGA
A01:14M15M:614101:	TGATGAGAAAAGAGGAGAGTTCTGCTTTACCTGCCACACCAATGTCG
A01:14M15M:614251:	CAACTGGTTCAGCTAAAGAACATGATGCCTCCTCCACAGTCTGTACT
A01:14M15M:614351:	CGGAAATGAAGTCATTGGAGACAGTGGCAGAGGATGGAGCTGAAGAA
A01:14M15M:614451:	CAATGGTAAGAGGGTCTCTCCTCCTCATCTGGACTCATCTAGCTCAG
A01:14M15M:614551:	TCTCTCACTCCTCAACACTAAAAAAACATTTTGTGTGTTGTAAGGCT
A01:14M15M:614651:	AGAAGAAGTCAACTTCTAGTTGGTTGTAAGTTAGCATACATTGGCAT
A01:14M15M:614901:	ACCATCTTGCTCTTCTTTAGAAGAAGATCTTATAAACCCGCAGAACC
A01:14M15M:615001:	AAGAGAATCAGTGTCCTACTTCGTTTGCTTTTAGCTCCATCTTCAAG
A01:14M15M:615101:	TTTCAGACCCGTTTCTTGACTTCTCCATAATCACTTTTCTGTATATG
A01:14M15M:615201:	GTTTGTCATCTGCAAGACGGCTTCTTCCATTTCTTTCAACTGTCTCT
A01:14M15M:615301:	AGCTTGCTTTTCATGTCTGTTATGCTAATCCGGAGACTTAACAGTCT
A01:14M15M:615401:	TAGATAACTCTTGCTTGTCAATAACTCCAACCACTTTCTCTGATTCT
A01:14M15M:615551:	TCACTTCCCGCATCTCAGGCTTCAATCTTGGTCGGCTAGATTCACCA
A01:14M15M:615601:	ACCTGTATCTCTTCAGTCTTCCTGCGGCTTCTGCTTCGGTAGGAGCC
A01:14M15M:616001:	GATGCAGGAAATTTTGTTAAAGCTTGACTACTTTTCTCAAGAGATTT
A01:14M15M:616151:	TTCATCTTATTCGTCTTTGCAACATCTTCCTCTTTGAGATTTTCACA
A01:14M15M:616301:	ACCTCGTTGCTTTTCTCTTGCAGCTCCAAACTAAGTAACTCTTCTCT
A01:14M15M:616451:	AGATCTGACATTTCAAAAATCTGCCTCTGTAAGTCCCCCCTCATGTT
A01:14M15M:616551:	CATTTTCAATGTGTGTAGCCTTGAGCATATGCTCTGCTTCTGTGATC
A01:14M15M:616651:	GATTCCACTTAAGAAGTTGTCTACTTCAAGGCCTTCTTGTAACTTCT
A01:14M15M:616751:	TCTAATGTCTCAACCTTGTGCTTTAGGTCTATATTATTCTCTCGTAA
A01:14M15M:616851:	GGGACTTGTAAACCACACACATGTTACTCAAAGCAACAACTTCCTGA
A01:14M15M:616951:	GAACTCTGAAAGCAAAGTTTTGTTAGCCTTGAGTGTAGAGGAATGAT
A01:14M15M:617051:	GTTTGTATTTCATCTCTGAGCTCTTGCTCTTGCTGTTCTCTTCTGAT
A01:14M15M:617151:	CCAGCATGTTACCATCTGAATGAAACTGTCCAAGTAGAGACAAGAGC
A01:14M15M:617251:	ACACTTTAACCCATTAATCTCTCCCACAACAAGTGATGTTTGGTCTT
A01:14M15M:617301:	TAATCTTACAATCTGCTTCAACTTGAAGTGCCTTCACCACTTGATAG
A01:14M15M:617401:	CTGCTCAAGATTCTCACTCTCCAGTTCGGATATGAGCTTCTCTGAAA
A01:14M15M:617551:	GTTTACAACTCTGTCAAGCTCTTCCTCATACTCTCTTTTCCTTGAGC
A01:14M15M:617651:	TCAGTAGATCTTTTATAATCAGCATGCTCCTGCTTCTCAGTGGAAAG
A01:14M15M:617751:	GATCAGTGTATTTTACTTCTAGTTCTGTAAACTTCTTCTCCAAGACT
A01:14M15M:617851:	TATGAGTTCAGACTTATCATTCTTGAGCAAAGTGAACAAGTCTTCAA
A01:14M15M:617951:	GATCTCTCCAGTGAAGAGTTCTTCTCCAAGAGCTTCTGCATGTTCAC
A01:14M15M:618051:	ATCTCTCTCTTCTTAAAGACTCACATCTTTCGTGCAGATCCTTTGCT
A01:14M15M:618151:	ATCAGCATTCTTCTTTATAATGTTATCCACTTCAGACAGCTTTCTTG
A01:14M15M:618251:	TTCTCTTCTTGTAGTTTCTTCACTGAGAAGACAAGTGATGACGGATC
A01:14M15M:618351:	TGTCTATATAACCCTTCAGACGGTGTATCTCTACTTGAAGAGCACTG
A01:14M15M:618451:	CAAGCAAGAGATCTCATTTCTCTGTATCTGCAAGGTGATAGTAGAAG
A01:14M15M:618501:	CATTATGATTACTCATCTCAAGCTCTCTCAAAATTTGAGTCTTGCTT
A01:14M15M:618601:	CTCCAAGCTTCTAAGACTAGCTTCAAGTTCCGAAAACCGATACTGCT
A01:14M15M:618701:	TCTTGATCTTTATCTGACATCTTCTGCGCTAAATTATCTGCTTCTAA
A01:14M15M:618801:	TTACCTTTGCAGCTCCAGCAAGAACTTCACTGCTCAGTCTTTTGGCA
A01:14M15M:618951:	CTTCTTGTTTCAAAGCTTTGGTTTCATTCTCTGCCTGCTCAGATTTG
A01:14M15M:619051:	AGATATCAACTCAAGGCATTTATTGTATTGCACCAAACCAGCCTCTT
A01:14M15M:619101:	CAGATTGCAATCTTGAAAGCCCTGTGTCCCTCTCCACCTCTAGCTTT
A01:14M15M:619201:	ATCAAATCCTCTAACATCATTTTGAGCATTACTGAGCTCCTTTTCAA
A01:14M15M:619301:	TCAGTCTGAAGCTCGAGCAATGCTCTCTTCAAGCTTTCAACTTCACT
A01:14M15M:619401:	TACTTTTACTTGTTGCACCATCTTCTTTAGGAGGTCCAGAAGTAGAT
A01:14M15M:619501:	CATAGCTTTATGCGCATGACGAAGCTGCACTGTCGTGTGATCATACC
A01:14M15M:619751:	AATCTATATTCAAAGACTCATAAAAAGGAGAAATCAAGAAGACCTGC
A01:14M15M:619851:	ACGAGTACAACCGCGTGGAGTCTGACTGCAAGTGACTGGCCATTACA
A01:14M15M:619951:	AGTTCTACAAAATAAGACAATGTGACCTTATAAGGAAGTCAACAATC
A01:14M15M:620051:	AAAACAAACCTTTGCACTTTGTACCAAATGGTGGATATAACTTTGGT
A01:14M15M:629701:	GAAAGAACATCAATCTTTCAGAGAGACGGACGCAAAATCATTTTAAA
A01:14M15M:629751:	AGAATTCAATGACAGTTTCCAAATTTTAGTACACTTGCATTCACCAC
A01:14M15M:620251:	AATCTCATCTCAGGAGCAGCAGCAAGCAAGAAAAAAATCATAATAAT
A01:14M15M:629901:	TCACAAACAAGAATTGGGAGAAAAGGTGGAAAAGACAGTCTTTATAA
A01:14M15M:620401:	CAACATATATCACAGAGGTAGATTCTTCATCAACAGCAAAGAGAAAG
A01:14M15M:620451:	GAAAAACTCTTGCTTGTGGGGTTTTTCAAATGAAATTTACCAGAAAT
A01:14M15M:620551:	AATTTCTTTCCCCCTAAGGAACTCAATATATCTGAAATTCAGGAGAG
A01:14M15M:620701:	CAGGAAAATATATGTACAAAGGGGGTGTCTGCTTTACAGTAAAACGG
A01:14M15M:630351:	AACCTATTGTCTCTTTAATGGAGAGACACATACGCAACATTCTCTTT
A01:14M15M:620851:	ATAGAATGATTAGTATGATTGGTGCGTACAGTATGGCCCTGTTCGTT
A01:14M15M:631101:	GCCTTTTTGGGAACTCTCTTTTTTCTTTGTCAACACTTGAAATTCTT
A01:14M15M:631551:	AAGTTGTAACTATAATAATATACAGCAAGTGTGCCGAGACTAACGAA
A01:14M15M:622301:	ATTTGATATGCAGGAACGCATTGTGACGTATCTTCTCACAGCTCATT
A01:14M15M:635351:	TTCTTCAACACGCAGCTCATGTTCCACCAACAAACATCAACAAGTGT
A01:14M15M:635451:	GGGGGGGGGGGGGGGGGGGGTCATCAAGATCTCCCAAAGCAAAAGTA
A01:14M15M:626201:	GAATAGACAAGACATAACAAAAAGAAGGTGAGATGTCCCGAGAAGAG
A01:14M15M:635601:	TCACCAAACGAAGCTAACAATGGCAACACAATTATCATGTAAAGTCC
A01:14M15M:627651:	AACATACTTTCCATTGTCCAAGTAAGTGTTTCCAACTCTGTATGTAA
A01:14M15M:628001:	CTTTGAAATAATCCAACCGGGTTATAATAATATGACATCTGTGAGTA
A01:14M15M:629401:	GATTGATTTAGAAGATAGGTCTAGCCATCTTAAAACAATCTACGATT
A01:14M15M:629451:	TTATAGAAGCTGACCCGATTATTATGATTGAAGAAGTAGGTGCTTAT
A01:14M15M:638901:	ACCCATTTTTTTGCTAAACCGATCGCTGCTACAAATATATTGGTGTG
A01:14M15M:639001:	GTAGGGTCCTAAAGTTACTATATTCATACAGCCATAGTCGGTGAATT
A01:14M15M:639101:	TTCTTCTCGTCCCCGTTAAATTTTATAACAACAGTTACGGCACTGAA
A01:14M15M:639251:	GTAAGCGAAATAAAAGGATACAGTTAGAATATTGAAAGGCTAGGGCA
A01:14M15M:639401:	GACACGAAGTGTATGAAATCTTTTATCAGCAATAGTATGTGTCGATC
A01:14M15M:639501:	ATACTATCTTTTGTCCAAAAAAAAAGACAAGAAGTCCCCGCTAACAA
A01:14M15M:641901:	TTGATAATGTCAACATGGGCCTGTTATTATTGTATAGCTGTTTGTAC
A01:14M15M:650651:	CAAATCTACACTATTTTTTGGGCCTGTGTAAAAGTCAAGTACTATTC
A01:14M15M:651001:	AAATGACAGATATACCAACCCCTTGGTGCTGCCTCTCGTTTCAGCAC
A01:14M15M:651301:	TCACACTTGTTGCACGTTCCCCTGAACCTGCAACAACCACATAACCA
A01:14M15M:651401:	TGTTTTCTTGGGAAACAAGTAGTATTCGGGACTCACATCAACATGTC
A01:14M15M:651501:	ATAAGCGAAATGTTTGATCTGTCGAGCTTAGTCGCTATCCACGGATA
A01:14M15M:651651:	GCGCTCGTATGCTTCTCGTACATCTCGTAAGGTCTCTGCTTCGGCGC
A01:14M15M:651751:	GGAAGAGAGGATAGCCGTAAGAAGACAGAGTATCTCCATTGTAATAC
A01:14M15M:652051:	AATGAATCGGTGTTCTTTGATTTGTGGATTTTGGTGTTGAATTCCCT
A01:14M15M:652201:	CAAGTGCTTGCAATTTCACTAACCCTTTTAAGGCTCTTAATGCTTTC
A01:14M15M:652351:	ATAGTAGGCCTGAATCTTCACTGCTGCAAATTCTTCAACAGCCATTG
A01:14M15M:652401:	TCTCCGCGCCCTTGTTCTCATCATGTTCAGTGTCCACGTTTGCGACC
A01:14M15M:652601:	CCACCACACTCACTCTGGATAATCTTTTCCTTTGATCTCTCTTTCTT
A01:14M15M:652701:	AAAATCTTTGCTCAGACTACCATTATACGTCAGAGAAGAAGAGATCG
A01:14M15M:652851:	ACACCGTAACTACCCATCACTCAAGAACATTCATTTTCCCGTTCTTT
A01:14M15M:653651:	TAGATAGATTCCTTGCCTACTTCGTTGGATATCAGAATATACTAAAA
A01:14M15M:653751:	CAATATTTCACTGCACAACCCGAACTGTAGATGGGAGACGATCGTGT
A01:14M15M:653901:	AAGGGTGAAGCAGAATCCGTGTGAAATACTTTCTCATGATCGTAACT
A01:14M15M:654051:	ATATTTGGAATAATCAAAACACGGTTGGCTTGAGTGCCCCCACATTG
A01:14M15M:806951	ACTTAACCTAATTGGTATAAATTTCGAGGAACAAAACATTCGTCACA
A01:14M15M:663951:	TACATAGTGTTGAATATAAACGGAAGACAGAGAAAACATGAGTCTTG
A01:14M15M:664101:	GAGAACTCTTACAAGGATATTGTAGCAGAAAATGGAGAGACAATAAG
A01:14M15M:664201:	TATCCCCCTTTGGCCCTCCTTCGAATCTTAAGTTGAACCTCTTCACA
A01:14M15M:664401:	GGTCCCCAAGTGGCAGTGTCTCGTTGGATTGCATATAAATTGATTAG
A01:14M15M:664601:	GTCGGGGAATTAGTGGACCGGAGGGATGTAACCTAAGCACCTCCTTG
A01:14M15M:664701:	ATTATGCTTCGAAACAGAAAGAATCTCATCTCGGAGTTTCTTCATAC
A01:14M15M:664801:	GTTGCTGATCCCGCAAACAACAATTCCTGGAGATATCAATAAAACAA
A01:14M15M:664901:	AATAGACTTTATTATACCACGAGGAGAATTTTTAAACCGGCTCTGTC
A01:14M15M:665001:	AAGCTGACATGTCTTGGTCTGCGTCTTCATGTTCTTGCACAACTTTT
A01:14M15M:665151:	AAGTACCCAAAAGTTCATTGAATCTCCTCACTATGTTATTGGAATTA
A01:14M15M:665251:	ATCGTTTGTAAGGGTGGTGAGGAGTGCGCTTAGGTTTACCGTTGAAG
A01:14M15M:665351:	CTTATATACCCAAAGGACTGAATCGTTTTCTTGCTAAAGAGATTCAA
A01:14M15M:665501:	AAAGAAAAAAACATTAGAGAGAAGTCACATAATCATCTCGTTGCATG
A01:14M15M:665651:	GAAGTTTATCGACCATTTTTGTTACCGGGCGGTTGGAGAACTTTAGA
A01:14M15M:665801:	GTGAACAGAGGGCGCGGTGAGGGTGGAGACTTAGCTGGTGAAGGTTC
A01:14M15M:665901:	GGTCTGTCTGAGAAACGATTTTAGGAACATAAAGGCTAAGACGGTTG
A01:14M15M:673301:	CCACACTCAACTCGTGGAAACATTTAAAATTAGGACTTGATCTAGTA
A01:14M15M:673401:	GCCACATCTATACTATTGAAACTAGTCTATTAATCTAATCACATCGT
A01:14M15M:673951:	TGTTAACCGATCAGAAGTGATATAGTGGGTGTAGTAAATTAAGATAT
A01:14M15M:674851:	ACTAGCCGAAATAGTGTATCTAACTCGGAATCCGCTAACTTCTAGTG
A01:14M15M:675801:	CTAAAGTATCGGCAGAGGAGATTTCAAGGATTGGTTAGATTATTTCT
A01:14M15M:675901:	ACTATCAATAAATTTTCTCTACCACGTGAAAGAGGTCGTCAAATGTA
A01:14M15M:676801:	ATGATGCTAGATGGCGATTTGTACAAGGAACTAATCAAATATCAATG
A01:14M15M:676951:	TGAGAAATGAGATACATAGTAAAGAGATAAACACAATCATAAGCCAG
A01:14M15M:678801	TAATCATCGACCAGCAGAAAAAGCCAAAGGCGATATAATGATAGTAA
A01:14M15M:692701:	CGATCAACTAACTACTTGAGAAAATCTGAAGCAAAGTCGGTCAACGT
A01:14M15M:692801:	ACTTACCAAATCCCCAACTAATTAATTTAACGAACTCTCCTTTTCTT
A01:14M15M:692901:	TGGGACTTGGAAGAAAGATTCATGGCTTGTGTTCAGAACACACTCTA
A01:14M15M:693001:	TCTCTCCTCTGCTCTCTCCTATGTTCGGTTTGTCTCTTCTTCTTCCT
A01:14M15M:693101:	TCCAATTTCGTTTTCTGGGTTTTCCTCAAATTTGATTTTTGGTCTAA
A01:14M15M:693301:	AGTAACTTGATTCTGTTTCTGATTAGGATCAACTCCCGCCGGAATTT
A01:14M15M:693501:	ATTGTGAAAAAGATGATATATGCAAGGAAGTGCAATGTGGGAAAGGG
A01:14M15M:693651:	CCAACTGTAAAATCTCTATCCCTATATCTCTCTTGACACTAGTCACT
A01:14M15M:693751:	TTTGATCTAACTTGCGGTGAAGCAGCTTCTCCAGCACAGCCCAAAAC
A01:14M15M:693901:	GTTTTTAAATAGTTTGTCACTGGGTGGATTGTGGAGGAGGGTTTTGC
A01:14M15M:694101:	CTGGGGGTTTTGTGTTTCGGAAGGTGCACTTGGAATGGACTGCTTGA
A01:14M15M:694201:	GATAGCAGCAAGAATCAAGGTTTGATGACTCCTTACCTGCCTTCATC
A01:14M15M:694301:	GTTTGTTTACATTGCAGCAACAGGATTGAATATAAGAGGATCATCGT
A01:14M15M:702201:	GGAACCAACACGTATATGATCTTTGTTTTTATTAAAGTTTGAGAGGA
A01:14M15M:704251:	AAAGACGTGCCATGTTTTCCTTTTCTTTACGAGTAAAAGCGACCACT
A01:14M15M:704401:	CAACACCAAGTTCAACATCATCTCCATTTCCCAAAGTAAAGCTCCAC
A01:14M15M:704501:	TTTGGGTGTAGCAATTTTATAAGCGTCTTCTCTTCATTCCATTTGTT
A01:14M15M:704601:	AATAGTGGAATGTAAAATATGTTTCCTGTTCTAACTTCCTCACTGGG
A01:14M15M:704701:	GTTCTTTGTATTCCACCAATAAAAATCCTACTGTCACCTCCTATCTT
A01:14M15M:704801:	CATTTGGCTGTTTATTTGATCACGTTAACTTCTTAGTTCCCTTAGGG
A01:14M15M:706401:	TCAACATTAAACTTCTCGGAATTGTTTTTGGTTAACACTCCCAAAGA
A01:14M15M:706501:	GGGGTAGTTGTAAAGTATCATCTTGTTCTTTTATCTCCTTTTTGTTA
A01:14M15M:706601:	ATACAAAGACCGCCGTTGGAATCGTGGGACAAATATAATAATACTTC
A01:14M15M:706801:	CAAAAGCAGAGGTGTCTTACTAATTTAATCAAGAAAAGGGGTTTCGT
A01:14M15M:707051:	TACACTTGGTTACACATAAAGCGTACACGGTTTGATTCCTATACACA
A01:14M15M:707251:	CCGGTGTGTTGGTGAACACTGAAGACCAAAGAGGAATCTCTTGGCCT
A01:14M15M:708951:	ATAATCGGGGCTTGGACTGTGGGCATATAAAATAGGTAAACAATAGT
A01:14M15M:709051:	CGTAACCACAAATAAGTTCATATTTCTCTATCACTCTCTAATGCGCA
A01:14M15M:709601:	GAAACATTAGTAAAATGGTAGTGGAAATTAGGAGGGGCCATTAGAAA
A01:14M15M:709701:	TCCCCTTATATTAAATATGGATAATAAAGAGAGATGGAGGGTCATCA
A01:14M15M:709801:	GCAATGAATGGTGGTTATATGCAATAGTGGTTATATGATGATGATAA
A01:14M15M:709951:	ACGGTCCTGCTGACTACTGAGTGTGTGTCTGTTCCATATCAAGATAT
A01:14M15M:710101:	CTACCACCCTATAGTCGGGTCAGTATATTGCATCCCCATCCGCTTTA
A01:14M15M:710351:	ATAGAACGAGAATCGCTTTGGTCAACATTTTTATACCGTTTTCCCCA
A01:14M15M:710851:	AGATTAATATTGGGAAACTGAATGTACGTAGGCATGCCGCATGCTGT
A01:14M15M:710951:	GTACAAATAAGTTTCAGTGCACTAGATGTCTTGAGCCATCCAGTCCA
A01:14M15M:711051:	GCCCAGCTCACTTTACTCGACTCTAATAGTTTCTATTTGGTTATTAG
A01:14M15M:711251:	GACCCAAAAAAACTAGTTTGTGATGTACGACAATTTACGAGTTATAA
A01:14M15M:711351:	TTACAATAATGTATAATGGCAACTCGCCAAACAGAGCCGGTCCTTGT
A01:14M15M:712951:	CACTCTCTCTTCCATGCTTTTTGTAGTTTTACTATGAAATATACCAA
A01:14M15M:713951:	TCTCATTCATTTTGCCCCCAAGTGATTAATTCATTGTATGTCAATCA
A01:14M15M:714201:	GCAACTAACAACTTTGTTGTTGTTGTGCTTTACAACACAGAGTTTAG
A01:14M15M:714301:	CAGTCCTACTAGATATTTCTTCAGCTACGTGGCATAATGGTGCAGCA
A01:14M15M:718651:	TACGAGAGAGAGAGAGAGAAAGAAAAAGCAATAAAACGGAAGAGAAG
A01:14M15M:718751:	AAATCTCTCTCCATTGACAACCTTTCACTTCCATCAACACTCTCCTC
A01:14M15M:719001:	CCTCTCCAAAACCGAAGAAGAACCCATCTCCGGCGACGGCGGCGATA
A01:14M15M:719151:	TTTGTTGTTCGGATAAAAATACAGAGCATTTGCGGACAAAGCTATGC
A01:14M15M:719551:	AGATCTCAATGCAAGAAGGATTTTTTCACGCGCAATAATTGTAATTA
A01:14M15M:719751:	AATTTGTGCAGCAAGAAGTGTCGCCCAGAACATCCGGTCGGCTTTCA
A01:14M15M:720001:	TTTTTACTGCTTCACTGACAATAACATTACCTTTCTCTTTATCCAAC
A01:14M15M:720051:	ACCCAGAGATCATGTTTCTTTTTCTCCACTACTGTTTCCGATGTTTA
A01:14M15M:720251:	TTTCTGGGGACTCCCTAATTTTGACTTTACTATGCAGCAGTTTTGTC
A01:14M15M:720401:	ACGCTGGCTTAAGGACCGCAGGGAGAAGAAGAAGGAGGAGACTCGAG
A01:14M15M:720701:	TATCATGACTCTCACTGCCGGTGCTGCCACAGGTCCAGTAGCTTCAT
A01:14M15M:720801:	GAAAACGTTAGAATTGATCTGAGGGTTGACTCAAAATTAGAAGTTAT
A01:14M15M:720901:	GGGCGTGGCGACCTTGAAGGCGAGGGCGATGAAGGAAGTGTGGAACA
A01:14M15M:721001:	AATGTTCACAATGGTAGCAACGGTAGCTCGAGCAGTAGTCACAGTGG
A01:14M15M:721301:	CGAGATGTGTTCACTTTAGGAGATGATCGTTGATCTGATTAAAAAGA
A01:14M15M:721651:	GATGAAGAGTAAGCATGTTGGAAAAACCTTCACCAAGAAGAAAAAGA
A01:14M15M:721801:	ATAGGAGGTTTATCTAATTCCTTCCTAGACATTAAAGATGATTCTTC
A01:14M15M:722301:	TTTGAAGACTGTCCTGCGAGGTGATGTGGAATTTGAATGCAAGAGCC
A01:14M15M:722401:	GCTGAAAGGAGATTTAGGATGTGAATAAACCGTTTTAAAAAGTCTGC
A01:14M15M:722501:	CTTTAGGGGTTCTTTTAAGGTAATGTTTTGTGGGTGGGTATAGGAAT
A01:14M15M:722651:	GGTCTCTTTGTGTTGGTGGTCATTTTGTATAAAAAAACAAAGTTGAA
A01:14M15M:722751:	AACATCAAATATGCTTCTTTTTTGTCCCACTGTTGGTGAAAAAATCC
A01:14M15M:722951:	ACTCTCAACATTTATACTCGTGTTCTTAAAATTGGATAAATGGTCGG
A01:14M15M:723051:	CCCCTTTGCAGAATTTACACAAATGCATAAACATTTTGCATTCAGAC
A01:14M15M:730501:	TGGTTAATTGCATTCCCAAACAAAGAAGATCCAAGGCAAAATGCTAA
A01:14M15M:730601:	GGCCACTTTTCTCTGCTTCAGTCTCTCTCTCTCTCTATGGGGTGGTT
A01:14M15M:730901:	AATAGTTTATCGAATATTCCAAATCACATGTAGCTTTTCTTCAAGCG
A01:14M15M:731001:	TTAAGAGCAAATAGCATAAACAAGCCTTATAAAGTTTTGTGTCTGGA
A01:14M15M:731151:	TGACGTCCAGGTAAAGAGAAATAGCAGCATGGATATACTCGTCGTAG
A01:14M15M:731251:	GACTGAAGCTACACAGCTGAATATCATCGACGATAGCTTCCCCAGAG
A01:14M15M:731401:	TACCTGTATCGTAGCGAAGACGAGGATGATAAGGAGGGATCCGAAGA
A01:14M15M:731501:	TATATCGTTAACCCCACTACCATTGTAGCTGTGAGAACCGCAGCCTC
A01:14M15M:731651:	GTAAACAATGATGATGACATGACGAGTGAATCTGAGACAAACATGTC
A01:14M15M:731751:	GAAAAAGAGCAGCAAAGTCCCACGGCGAAAGAGATGGAGAGAGTGAA
A01:14M15M:731851:	GCCACAGCACTACAAACACACACATGAAAAGCAAACACCATCAGTAC
A01:14M15M:731951:	AACAGTAGTGAGTAGTCGAAGATCAAGAAATAAAGAAGACGCAACTG
A01:14M15M:732051:	CGTGATGAAGACAGATATCTCGCCTACGAAGAAAACGACGGAGGAGA
A01:14M15M:732151:	AAAGCCCAGCGAAGCTCGGTGCTCTCCGTCATCTTAGGATAAAGCTC
A01:14M15M:732601:	GTAATACGACATGTGGAAGAGGTAGACCGCGTTGCTTTGTGTTGTTG
A01:14M15M:732701:	AGAAAGTTTTGTGTACTATATATAACAACCTGGGGTAGTCTTTTCTA
A01:14M15M:732801:	TAATACTGACTACGTAGATAACCCTAGCTACGATAACAATTGTTAGC
A01:14M15M:733101:	TCAATGTAGTCTACTCAGATACATTGATAATGCACATGTGTAATTGT
A01:14M15M:733251:	TGGGATATATTGCAGAAGTATGACTATCTAGTGATCTGGATAGTACT
A01:14M15M:736101:	CAAAAACAATGGCAAAGGCACTCGAACAAGAAATAGAACAGATCGGA
A01:14M15M:736151:	GTGTATAAGATGGTGCCCAACTGAAATTTATTGGAAGGTATGGGCTA
A01:14M15M:736301:	GTAGATAGGAATTAACTGAAGTTTCCAAGTGTAGATGGTGCCTATGA
A01:14M15M:769551:	AAAGTTTGGATAGAGTGCCATGGCCCCACACGACTAATAGGACAGTG
A01:14M15M:777401:	TTTTTTACTTGCAAGGAGATCAAATTGAGTCATGTTGCTGTTTTCGT
A01:14M15M:777601:	AAAAGAAATACATCATCATGCAGACCGTAGCAGCGTATGAGAATCTC
A01:14M15M:778751:	GGTGACCAAAACGCTACAAACTCTCTTTTCCTAATCTATGGAGTTCT
A01:14M15M:779001:	ATATCTAAGACCAGTCGGATACTTTTCCAAACACTAAAATCAAAAGT
A01:14M15M:779101:	CAGATATTGCAAACTTGTATGTAAGGAACAGAGTATGCAGTACGACA
A01:14M15M:779251:	ATGGTTTTTCTATAGTAAATGGTCCTGCTGTAAATTTACACGTGCAA
A01:14M15M:779351:	GGCTGTCGAGGGACAAAACCTGTGGGTCCAAACAATCATGCATAACT
A01:14M15M:779701:	GACAAATGGTAATCCACATTTCAGGTGTTTGCTTTAAAATTCTGATT
A01:14M15M:779901:	TTCATAGTTGTCTAGAGCATTTGTCGTTTTATGTTACTGGTTTGTAT
A01:14M15M:780001:	AAAAATAGAAGATAGCAAAACAAAACACTCCCTAAAGTACACGCCTA
A01:14M15M:780051:	GATTTCTTCTACGATGGACCAAGTGTCATTAGGTAAAAAGAGATGAG
A01:14M15M:780201:	TCAGCGAAACTGAAGTGAGAGAAATGAGAAAAACAAAACAAAAAGCA
A01:14M15M:780251:	AAACACTCTTTAACAATCTACGGCATGAAAATCTTGTCGCCACACTT
A01:14M15M:780351:	TCGGTACATGAACAGGTTTACACGGCTGACATTTCCCACACTTCGAT
A01:14M15M:780451:	ATGACCGTGAAAATCCGACCCGGTTCTTTGACCAAGCCATCCACCTG
A01:14M15M:780751:	AACTGTGGAGACGGCCAAGAAGAGGTGGAGGAGAGCAAATGTGGCGA
A01:14M15M:780851:	CGGCGAGAATGCGAACGTTAGCAGAGACAAGTGTGTGGCTATTTGTT
A01:14M15M:780951:	TGGGATTTGGGGTTATTCATTTGGTCTTAAGTTCAAAAAAACTTAGA
A01:14M15M:781451:	TTGAATCAGACTATAGTCACCATTGACCCCAATGGCTGTTCATCCTT
A01:14M15M:783101:	CTCAGATTTTCGTTCATTTTGGCAAACCTTTTCATGTTTCTTTTCCT
A01:14M15M:783201:	GTTATTAGCTTCAGATTTTTGATATATTTTGGAGTCACGCTTCACTA
A01:14M15M:783301:	CGAGACATGCACAACAAATCCGAGATGGATATATAACTATTTAGAAT
A01:14M15M:783451:	AGGATACCGTATGAGCTCAAGAGTAGTATTCATCCAACAATTTAACC
A01:14M15M:784801:	TACAACGGTCAGCAAAAAAAAAAATTCCTTCCTACCGCCACTTAACA
A01:14M15M:786251:	TACTCATTCACGTAGATTAAGAAAACTAGGAGAAGGTAGCAATTTGA
A01:14M15M:786501:	CTCTACATTTTAAGACCGTGTGTTAGGAATTCTGCATGAATGTCAGA
A01:14M15M:785201:	AACACGGATGATGAGTTTACTTGTTGATAATTAGTTTTGAGTTGGAA
A01:14M15M:786701:	GAACAAAGTTTGACTATGTGTATATATGTAGGGTATGTAAGTACTTG
A01:14M15M:786851:	ATCGAATCGTGAGAACGACTAAGATCAATTAAACAAAGATTAGGCCA
A01:14M15M:785551:	AAGAACCAATAAGATGTAAATGGGCTTATGATTTGACTAGGCCCGCT
A01:14M15M:787001:	GCTCAAAAAAAAAAGGAACCAGCTCCTGACTCACTGACTCATCCTTT
A01:14M15M:785701:	CACTCGCGACCCCTCATCTGCAGAAACAAAACCTGTACAATTTTCGA
A01:14M15M:789051:	TTTGGTAAAATGCCAATAAACTTGACGAATCATCTTGAAAAAGGAGT
A01:14M15M:789151:	ACTGGTAACCCATATCTGAATTTCGGCCATTAACCTTGGGTGGGTGG
A01:14M15M:789201:	TGATTTTTCGTGCTCTAGTGTATTCTGCTCCTTACAAGTTACAATCC
A01:14M15M:789301:	CAGATGCATCCTTATTAAAGGACATGTTACCAACGTGGATCCATTTC
A01:14M15M:789401:	CTCATCCTCAACTTATTTCTTCCAGTAATGACAAAGTGACAATTCTA
A01:14M15M:790651:	ATTTTACCTGTTATTATGATCCTGACACGAGGGTATGGATGTAACAC
A01:14M15M:956251:	CTTTGGATTGAGGTTTCGTCGATCCTCCATCTCTTCTCCTTCAAAGC
A01:14M15M:794351:	AGCTGAGTTTATTGGTTTGGATTCATCTCTTTTGCTTAGCGTTCCAA
A01:14M15M:794851:	ATATAGACGACCAAATAATATATCCTCCATATTCGACGGCAATTATT
A01:14M15M:795051:	TTCCTTTTGTGCTGTTTCTCTTTTTTTCACTCGTGCTACTATTCTCC
A01:14M15M:799451:	TATAGAAGAAAATACTCAAGTTAGGAAGCCATGATTAGGTTATAAGC
A01:14M15M:799551:	ATTCCCCCAAACTCGAAGCCCATAGACTCACTATTAGACCCTCATCA
A01:14M15M:799651:	TTTATACCAAAAACGCCACTGCTCTCTGTCCCCGGCGGCGAAGGTGG
A01:14M15M:799701:	AAGGCGGAAGGAGATGGAAGGAGGAGTGTCTTCGGCGAAGTCAATAC
A01:14M15M:799901:	TTTCTTTATTTCTCTTTCCCCGAGAATGGCGGCTGACACGTGTCGTA
A01:14M15M:800051:	TCCGCAAGATCCTCGTTTCTCACCCTCCAATTCCCTCTCGCGTGAGC
A01:14M15M:800151:	TGATTTTTTTATGTTGACAGGTCACAACACCGTCGACTGAGCCAAGC
A01:14M15M:800251:	CCTCAGGAGAGATTCCCCCAGATCACCTGAGTTTTCTGGTGGCTCTG
A01:14M15M:800651:	TATGGGTCTCGCTATGATGTGCTTCTTGTCATATAAACCAATTTGCT
A01:14M15M:800701:	CCAATGTTGTTGTCTGTAATATTTGCAGCAGAAGCCCAGCAGAAACA
A01:14M15M:800801:	TGATGGTGTACCACCTGAAAAGGTAACATTATTGTGTCCTGCCTAAA
A01:14M15M:800951:	ATTTTCCTGACAGTGGTGTTTTTCCTTCTAGTCGAATGATTTCCAGG
A01:14M15M:801051:	CTTGAAATGATTTTGTTTCCATGTGTGTTATCAAACTGGAAAAGTGA
A01:14M15M:801251:	TGGAGCATCCTCATTATGGCCTTGAGAAGGCAAATGCTTCTCGTGAT
A01:14M15M:801351:	TTCTAATGATGCTTAAACACCTGCTTTCACTTTACATGCTATGCGTC
A01:14M15M:801451:	TGAACTGAAAATCCTGTGAAGTGTTAACCATAGTAGTTCTTGTGTGT
A01:14M15M:801601:	ACGATCCACAAATACTTAGTGGTTATTTCCAAAAGATCGGGGGGATA
A01:14M15M:801751:	ACTGATGAACGCTGCTGCATATTCACAAAACCCTAGTGGCGGCACAG
A01:14M15M:801851:	GATCTGAACTGTGATCTAAACAGTGAAGGTAAGAACTAAGAAGATAA
A01:14M15M:801951:	CATCGATTGTGTTTTCTAGATATCTAACACGATGCTTAAAAGCCGGG
A01:14M15M:802051:	TGCCGTGTACAAGAAGGGATAAAAAAAGCAGACAAGGAATGTTCATT
A01:14M15M:802201:	AGTTAGGTTAGTGACGGGAATGTTCTTTGTTTCAACATAGAGGCAAA
A01:14M15M:802301:	TGTTGACGCTTCTGAAAATGAGACCTCTTTTTTTTAATTTGATACCA
A01:14M15M:802501:	ATAAATGTCTCAGGTTTGAAGCATGGACACGACTTCTTCTCCTTTCT
A01:14M15M:803051:	GGATATGGTCGGAAACGCATCTCTAGGGTTGACACATGACGAGGGGT
A01:14M15M:803351:	CATTCTGGATAAATCAATCGACGATTTCTCAAACTGTTTGTGGGGTT
A01:14M15M:803401:	CATCAAAATGATGTATTTATTGTGTTGGTAAAGGATGGAAGAGAAGA
A01:14M15M:803501:	ACCACAAGGATCCTAAAGAGTTTATCTCTCTCGACAAACTTGCAGGT
A01:14M15M:803601:	TCTCATGTAATGTTGCTGTGCAGAGCTTGGAGTCCTTAGCTGGAGAC
A01:14M15M:803701:	CGTGGTTACTCCTACATGGTTTGTGATTCTGACCCCATTATTTTATA
A01:14M15M:803851:	CACTTAGTGAAAGGGTGGGTTTATAATTAAGGATGTCTTGGCAGATT
A01:14M15M:803951:	AGTTTGATTCAGGACTTTTGTGAGGTATGCCCAGAGAAGCTTCCAAA
A01:14M15M:804051:	AGATCCGTTACTGCGTTGCAGGAAGTGGTACGTGCCTTTTTTTTTTA
A01:14M15M:804151:	CCTTGGGAAAAAAGGCTACTTTGATGTGAGGGATCGCAACGAAGCTT
A01:14M15M:804251:	TATCATCGCTTCACCGTGGATTCTGACAACTATATCAAGGTTAACTT
A01:14M15M:804351:	GAAAATTGAAAGCTCTGGTTCAAACAGGCAATGCGTCTTTTCGTGGG
A01:14M15M:804451:	ACATATGCCATGTTTTCCAACTCATCGAAAGCACAACTCTGTGCTTG
A01:14M15M:804551:	CAGGAAAGAATATGTTGATAACTTCGTGAAGAAAGCCATTAACGCCT
A01:14M15M:804701:	GGAGAATGATGGCTTTGGTATGCATGTGTTGTATACTTATTAATAAC
A01:14M15M:804801:	TATCGACTCAGTTTGATTGATCATATATTTTCCTGCGTACGTTTCTT
A01:14M15M:804851:	GAGCTGTGTTCAACTAAGGGAAAATAATAAGAGTTGTTTATTGCTGT
A01:14M15M:809001:	ATGAAAAAAAGAAGAAAAAAAAAAGACTTAGACAAGAGTCCCGCCTT
A01:14M15M:809101:	TTCCATAGCTCGGCATCTGACGTCATAAACCCTTTGGACTTTGACTC
A01:14M15M:809251:	TTCTCTCCCTTCAAAAGCTCCACCGCAATCGCCGCTACGAACCCTAC
A01:14M15M:809351:	GATCTCCAAACTTCGTACTCACCTATAAAACAATTGACAAATCATTC
A01:14M15M:809601:	CCACCATGAGTTGATTAAGATATTAATGACTGATCATTAGATCATAC
A01:14M15M:809701:	CCGAGGTCGAAGGCAGAGGAGATTCTTCCTTGATAGGATCGTCCTTA
A01:14M15M:809851:	CCTGAGCCATGCACCTGACTCCCACCAAAGGATTCCTATTGGAGAAG
A01:14M15M:810001:	GTACAAGCGAAAGATGGAGTAGGAAGAGAAGTAGTGAATGAGATAGA
A01:14M15M:810451:	GGAAAATGAAGTGGGGGATCTGAAAGAAGCCACATCTAGTTGAAAAG
A01:14M15M:810601:	TGAAAACAAAAGCGTCACAAAATTTCACTCTCGAATGTTTTTGTTTC
A01:14M15M:810701:	ACTTAACTTCATTATGGCAGACCCATGATGACTCATTTTGGTCTTTT
A01:14M15M:810901:	GATATCCTGCTAAGATACTTCTTAGCTCTTATCCGAATTTCAATCAT
A01:14M15M:811201:	AATAAGGCTCTGAGGCCCATAAGCCAAATAACATTTCAAAGATAGTA
A01:14M15M:811351:	TTCTGAGATGAGAAATAATGGAAGCCTAAACTTATTAAAAAACCCTC
A01:14M15M:813551:	CCGCTTGTGAGCTTAAGGTTTATGATACTCTTTCAATAATTAAAGTC
A01:14M15M:814201:	CCAAATTATCACTGATGCAGCTGGAAACCACCAACGAAACACCACCA
A01:14M15M:814251:	TCAAATCTTCAAATTGAGAACTAAATCCACACATAAAGCTTCACCAT
A01:14M15M:814401:	CCCATGACATTCTCTTTTTCAACTGTCCTTACGGCCCATGAGTGTGT
A01:14M15M:814501:	TCTTAAACCACCAATAAACTGACTCAACTACGACATTTTCCATGCTT
A01:14M15M:814601:	ATTTGTTGTAAAGGGTGGACACATGATTTCGCCGTCAAAAAAGAAAG
A01:14M15M:814701:	TACGTAGTTTCCTGGTAGCTCAGGTCAACAAGGTCAAGTCAAAAGTG
A01:14M15M:814901:	TGGTGATGATATCACATGGACCTTCACGTGATTCTAATATTCAATTT
A01:14M15M:815001:	AAAATTCGATTATACATACCAATACCATTGGGGTCCTAACTCATTAT
A01:14M15M:815701:	AACAAGTGTCCAGGTACATTTGCAAAAGAGTCCTTAAAGTAATCAGA
A01:14M15M:815851:	GAACCATAGCAAATTCACATTTTGATTCTCCTTCAATGGCCTCCATG
A01:14M15M:815951:	CGATTCCCTGATCGCAACCACCGTTTCATTTCCCTCCAGCTCGAGAT
A01:14M15M:816051:	GACGGCGGGAAGCTGGTGGAGCTTGTGGTCCCGGAGCCGCGACGAAG
A01:14M15M:816201:	GGGTTTATGAGGGAAGCTGAGTTCCTTCAAACTCTTCATTTCAATTC
A01:14M15M:816351:	CTTGTTGATTCCGATGATAATCCAATCGCTATTCTCAGCGAGTAAGT
A01:14M15M:816551:	TTGAGATATACAAACATCCCAAAGAGGAAAGAATAGCTAGAACGTGG
A01:14M15M:816801:	TGTTCACAACGGACACGCCCTTCTCATGACTGACACTCGCCGGAGAC
A01:14M15M:817101:	TCCAGCCGGAATGGGTCACCCTGTGGAGAAACGTGATCTGTATGATG
A01:14M15M:817201:	ATTCTTCCTTTCAGGGTACATTTAAATCTGCATACTCAACCTCGGTA
A01:14M15M:817301:	TTAGGTTGCTGCGTATGATAAGACACAAGGCAAGATGGCCTTCTTTG
A01:14M15M:817401:	ACTTCTCAGACTCATTGAGACATAATAGAGTACAGAGTGTTCTATTT
A01:14M15M:817551:	CTTGTTGATTACTACGATAGTTTGAGTCTATCCGGAAATGCCAGACT
A01:14M15M:817701:	TTATGATCGAAGTCGAACTATCTTATTCTAAGGTTTGGAAAAAGCTT
A01:14M15M:817951:	TGTGCTATATATATGGCAACCGATGCGTGATTGCGTATGTTCAGTAT
A01:14M15M:818051:	AGGTCGAAAAGAAGAAAATGGTTACTTACCTCCGGAAGCTGATCAAA
A01:14M15M:819801:	GTTGGGCTCTTTAGTCTACCTTTTGACCGCTTGTTAATGCATATTCA
A01:14M15M:820851:	TAAAGGGCGAGTAATCTTTTACCATATTATTAGCAGCTACTGAATTA
A01:14M15M:821051:	CATCTCCCAACAACTGCTTTATCAAGAAAACTCAAGATCTCAAAAAC
A01:14M15M:821201:	ACGATGAATCTAATATGTATCCCTCGCTATAAAAATTTGGACCTATT
A01:14M15M:821751:	AACATTGTGATTCTTGACTTTTGTCGTGAAAGACAAAAGCACTGTAG
A01:14M15M:821901:	GTCAAGCACTGACATGGACTAAACATGACTAATTCTTAAGATGTGGT
A01:14M15M:826051:	AAAAACACCAATGGATGAAAAATACAGACAATTCACAACAGAACAAC
A01:14M15M:826151:	CCCCACCTTCACGGTTTCCACCTTGTTGTTCCAGGCGAGCATATACA
A01:14M15M:826251:	GTTTGGTGTTTTTGAACAGGGTTTCAAGTGGGAATCATGGATGAAAG
A01:14M15M:826351:	GGAATCACTCATGTCTGGCTTCCTCCTCCTTCTCAATCCGTTTCTCC
A01:14M15M:826451:	CTGACAAACCTTAAAATCATTTTCTCAGGGTACTTACCTGGTAAGCT
A01:14M15M:826551:	TCGCAGCACTGAAACAGAAAGGGATCAAAGCTGTGGCTGATATTGTG
A01:14M15M:826651:	CGAAGGCGGGACTTCCGATGATCGTTTAGATTGGGATCCTTCCTTCA
A01:14M15M:826751:	GATTATAAGCCGGCCCCGGACATCGACCACCTTAACCCCAGGGTTCA
A01:14M15M:826851:	GTTGGAGATTCGATTTTGTTAGAGGCTATGCAGCTTCCGTCACCAAA
A01:14M15M:826951:	TTGGTTTAGAGATTTCGATACAAAATTACGGTTAGAGTGTCGGTTAA
A01:14M15M:827651:	GAAAAAGCAAGCCAAACTGAATCTGTATTTTTTTTTTGGATATCAGC
A01:14M15M:828501:	TCTGAGCAAGTGATCAGATTTAAGCTGCATAAGTTTTGTTGGTAGAT
A01:14M15M:828601:	TCGGTGTTTCCACTGCATTATCACAAAATCTTGTTAATTGCAGAATA
A01:14M15M:828701:	GATGGTAAACTGGAGTATGATCAGGAGGAGCATCGCTCGGGTCTTAA
A01:14M15M:828801:	CCAAAGGGATCTTACAGTCTGCAGTAGGAGGTGAGCTTTGGAGGCTA
A01:14M15M:828901:	AGTGACGTTCGTAGATAACCACGACACTATCAGACCAAACTCGTGGG
A01:14M15M:829001:	GGCACCCCTTGCATCGTAAGTAGATTTCATTAAGACTCCTTAATTCT
A01:14M15M:829151:	CGCTTTCAGTTTGATACTTTTGTTTGGTTTTGTCTGTTACGGGTTTA
A01:14M15M:829251:	ACACAAAATCAAGTTTTGCTGGCTCGGTTTTGGTAAGATAATAAACA
A01:14M15M:829301:	TTGTTTAGTTTCTGCAAGCCATTTCATTTCAGATTCCAAAACGGTTT
A01:14M15M:829401:	GACGTGATGTTTATTGTGGCAGTTTTATAGTCATTACATCGAATGGG
A01:14M15M:829501:	GGTAGTACAAGCTCTGTTATGATCAAAGCGGCCGAGGCGGAGCTCTA
A01:14M15M:829601:	TAGGAACTCTCGTTCCTCCAAATTTTGTTTTAGCTTATTCAGGTCTT
A01:14M15M:829851:	CTAATGTCATACCGCTCACACCAAATTGAATTTTGCGTATCGCGACA
A01:14M15M:844051:	GTAGCCGTGTAGGGTCCCAAGTCCTTACAAAGTACAAACTAACGCCA
A01:14M15M:844151:	CCCGGAACCTTCTCCTACCGCCAGAAGCCCCTTATTGCTGTCAGGTT
A01:14M15M:844301:	AAACAGACAACGCATCTCCTTTTTTAGATTAATATGTTTCTGACTGA
A01:14M15M:844601:	GGAGAAAACTCAATTACTATCTAAAGACAAGACTGAGACAGACAAGG
A01:14M15M:844801:	ACTTGGCGAACAAGAAAGCCAACACGCCTGAGACTCTGCTTATTTCT
A01:14M15M:845151:	CTAAACCTCAAGGAAACCAAAGACAACTTGCTGGAAAAGAAAGCTTC
A01:14M15M:845251:	TCTGCTTTGCCGCCACTGCCATGAATTGAACTGATTTGCAAGGGACA
A01:14M15M:846401:	GAACACCAGTAACCTTGATCAGAGGTTGATCCAAGAAGCTGTAAAGT
A01:14M15M:846551:	TATTCAATCAGAGTAAACCAAATGTATGAAACTCATCACATGAAGAG
A01:14M15M:846651:	GTGAAGGTTCAACGTTATGTGATTCAGTTTATGACACTTGCTCTTAA
A01:14M15M:846901:	ATCCTCATGCCCGAGTAATCTGGATAGCTCATCTTTCATTAAAGAGA
A01:14M15M:847101:	GTGTGGCAATATGATTAAACTACAAAACTTCGAGATTTGTGAAGCCT
A01:14M15M:847301:	GGGAAAGCTTGAAACCGCAGGCTTATGGACAGGTGGCAATCCAAGAA
A01:14M15M:847351:	ATAAGCAAATTCTTATCAGAAAGCATTAGAGTGGTGCCAATATGAAT
A01:14M15M:847801:	TTAATCCCAGATCGGATTTAATTTGGGTATTAACGATCCAAAGATAT
A01:14M15M:847851:	TAATAACGATCGAGAATCAAAACCTGGATTTAGCAAGTGGCGGAGGC
A01:14M15M:847951:	GGGAGGTTGCTTGCTTATCGATCTGGGTCTGGGTGGGTGGTGGTATC
A01:14M15M:861051:	TCGAGTGGTATAAAATAGTTATAGCTGGGGATAAGGAAACAAATAAA
A01:14M15M:861151:	CGTTGGGATAATTACGGACATACGTACAAAGGAAGGCTCCTCTCTTC
A01:14M15M:861351:	GAACCAAAGTCACTAAACGGTCAAGATTTTCGTGTCTCGTTCTTGTA
A01:14M15M:861551:	TCAGTACTACTTGTAACGAAGATAAACTAACTAGTTGTAGTGATTCG
A01:14M15M:863401:	TGAACTTTCTGTCTGTTTTATCGAAATTTTTTGAACGCTTTGATGTG
A01:14M15M:863501:	GTGCGGCGTTTACAAACTCCTTTACGGTTCAGATGGAGTTTATGAAA
A01:14M15M:864501:	CCATCCAATTCCCATGTTGACAAACGCATGAAACTAATAAGTGGACC
A01:14M15M:864601:	AAGCACTTTATGTTTGCAGTTCAAGAACAGAGGAGTAAAAGAGCGTC
A01:14M15M:864751:	TTAAAATTAACATTTCCCGAAAATCCCGAAGATGACTGTGAGAGGGA
A01:14M15M:864851:	AATCCCATCATTACGATTTTACTTACTGACAGTTTTTCCCTAAAAAG
A01:14M15M:865001:	AAAAGATATCACGTAATTAAATATGACGTGGCATCATCGCGTCTAGT
A01:14M15M:865151:	GTCGGGGAATTGATTCTCGCCGGAGAAATGAATATTCCGGTTACTTT
A01:14M15M:865251:	TCCGTGAAACTCGTCGCTGTTAAGAAACTCCGTTTCCGTCTCTTAGA
A01:14M15M:865351:	AATTAAACAGTCTCCCTAAGCTTTGATTCGATCTATACGTTTCCGAT
A01:14M15M:865451:	CAGTGCTCAAGTCTCGCCTCAAGCGTCTCTTAGATCGACCGTTTACA
A01:14M15M:865551:	CCGAGAGGTCGTCTCCGAGTTCGAGCCGAGCTCCGTCGTTTTAGCGA
A01:14M15M:865701:	TGAATTCGATTTGTTCGGTTGCTCCGTCGAGTCTTTCAACGACGCTT
A01:14M15M:865801:	TCTACGTTTAACGAATCGTCCATGGATCTTGATAGAGCTTGATACCA
A01:14M15M:865951:	ATGGACTCTCAGCTCTTGGTTATGATTCCTCAATCTGTAAATCGAAA
A01:14M15M:866101:	CAGGCGAGTACGAGTACATCGACGTGATTGTAAACGGTGAAAGGGTG
A01:14M15M:866251:	ACCGGATCAGTCAGATCGTTTCGATGGTTTCGGAGGCGGCGAGGCAG
A01:14M15M:866351:	GCGAGCTAAGTGGCTGTCTTCGTACACGCGGAACTCCGGCGATAACG
A01:14M15M:866451:	TCGGAGATTGAGCTGAGTTTCGAGGAGAAATTTTTGGCGTCGGTGAA
A01:14M15M:866551:	CGGTGGAGAGAGAAGCCAAGGTCGTCACGGGATTAGCTTCACTGTTC
A01:14M15M:866751:	ACCTCTTAAAACTCTCTTTTCCATTTTCAAGGGGGGTTATTACGAGA
A01:14M15M:867001:	ACACTCTTCAAGAACATAGATTTATCAACACCATAAGTAATGGAAAG
A01:14M15M:867051:	GAGTAGCACTTGTAACAAGAAAGCTTGAATCGGCAACACCATACGTA
A01:14M15M:867201:	AGTACAAAACTTCGGTATTGTTAATTGATTCATCCTATGTAACCAAC
A01:14M15M:867351:	ACTAGTCTTCAATGGTGCATGTATCACAGTTTTAGATGGAGGCAGAA
A01:14M15M:867601:	TGGGAAACTTCAAACGATTAAGACAAGTGCAGTTAAACATTTTGCTT
A01:14M15M:867701:	TTAAGAACATGTTGGTGCAAAAGGAACAGAAGATTTATGACAACTCT
A01:14M15M:867851:	ATCAGAATTTATATACTAGTATTATTTTACGATGACGGCAGCATTGG
A01:14M15M:867951:	AGCTGTTCGTTTCAACAGTGTGATATTCCCTTACTGTATTTTCTTTT
A01:14M15M:868051:	TCTTATGTCAGTGATATAAATTCTTCTGCTGCATCATGTTTGATTTG
A01:14M15M:869651:	TGTTTTGTGGTCACAATGCAATGTTCTGTTGATCTTTGAAATGGAAA
A01:14M15M:869751:	TGAAGCTAGAGAACAACTTTCTACATGGACCTAACTTTGTTTCCATA
A01:14M15M:869851:	CCGATCGTTATGTAAATGTATTGCAATCATTCATGTGCGGGCACCAA
A01:14M15M:870001:	AATTATTTAATTGCAATAATTCTAGGTCGCATGAAGTGGGTAAGAAC
A01:14M15M:870101:	CCAGTCTTTTTCAGGGATTTCAGGATTTGCCATTATATCTGAGAGTA
A01:14M15M:870251:	TTTCCCTCCTACACTTATCGATACGTAAATGAATGTTTTGATATTGG
A01:14M15M:870451:	TAACACTCAAGTCATCTAAACCAGAAGAACAACCGTTTAGTCCCTTG
A01:14M15M:870551:	CGTTGTGAGAATCGGAAGAATAAAGATCTACGCACAACCAACTCGTG
A01:14M15M:870751:	ATTGCTTTCCTGAATGTCTACTCTGTTTGTCTTACTTTCTCCCAATC
A01:14M15M:870851:	CTACTCTTAACATCATAAATAGTTCTCAGTCTTCTTGACGACATTTT
A01:14M15M:870951:	GACATGTAGGGATTAAATAACGTGTTAATGTTTGGGGACCAACCTGC
A01:14M15M:871051:	ACAAAGAGCCAATATGGTGTGATTACTTTGTGTGGCGCATGGACCTC
A01:14M15M:871251:	ACACCAACACCAGTAATTTACGAAAAAAATGAGCACTGTGTTTTTCA
A01:14M15M:871451:	GGAAGAGGACCACATTTCAACACTTAAGACGTGAGAGGGAAATATGA
A01:14M15M:871651:	TAAATACATAGACTTATCCGCATTGACATCAGACCCCGAATATTTGG
A01:14M15M:871851:	GACAGAGTTTCTGATTTAAATTCATAATGATAGAAAGAAACAGCACG
A01:14M15M:871951:	TTGTGTTTGGTGTACAGTGTAGACTGACTTTGGCTTCTTTTTGTTTT
A01:14M15M:872401:	CGTCGCTTGGGTAGGCAACAACACCCACATTTCTGCTTTGATTTTTT
A01:14M15M:873851:	CTGACTTAACTTCTCTAATCTACGACCCGTTACAGAAATAAAAGAAA
A01:14M15M:874001:	CTTCAAGTAATGCGGAATCAAAGAAAAATCTTGCAAGTACAATGGAT
A01:14M15M:876701:	AAGATTGTAGATAGAGTTTCAGGTTGAAATCGAAATGACATCATCAT
A01:14M15M:876851:	AAAGGCTTCACAAGAGCTCGCTACTACTTTGATGATCAGACAAAAGT
A01:14M15M:876951:	CAAAACCTGATTCAACAACAGCCTCACTCCACTTCTCTTCACCAGCT
A01:14M15M:877051:	TTCACCAGCTCCGACTTGGGATAATCCATCGTCTGAAAGTAATCCCA
A01:14M15M:877151:	AGATCATGATCCCAATCTCATCTATACCGTAACCCTTCTCGAGGAAG
A01:14M15M:877251:	ACATCGATGAAGGAGAACCGCAACGTCGACGTTAAGCGACTTAAAAT
A01:14M15M:877351:	CATCGAGTCAAGATCTTCCCAATCTGTTCTTCGGAGAGACCGGTTTG
A01:14M15M:877451:	CAGGGAAACGGTAAATGATCTTTGCCCACTGGTTCTTATCGATGCCT
A01:14M15M:877551:	GCAGATCTGCGGCCTTTTGCAGAGGATTGTTGGGATGTCTGATTTTG
A01:14M15M:877651:	CTGTAGTAAGGAAACGCTGCGAACTTGCGGGTGATGGTTTTGATCTG
A01:14M15M:877851:	TGGTCTATCTTCAGCATGTGGTGGTGGTGGATCGGGGAAGCTGACAA
A01:14M15M:878051:	GATCGGATTTGTTGATGATCCTAACGGAGACGCTGTTGCTAAGACCT
A01:14M15M:878151:	AATCAGGTTTGGAGGCACGGGTCTTGCGCTGTACTCGACTCTGTTCT
A01:14M15M:878301:	ATGATTCTTGTCGGAAATGGAGTTTTCCCGTGAACCAAAGCTGCGCC
A01:14M15M:878451:	AACAAGTGAAGCTGTAAGAATAACTAACCTCGTACAAGGGTTGTCTC
A01:14M15M:878701:	AGGGAAAATCCAAAAAAAAAGGACTCACCTTTCGTTGTTGAAACGTG
A01:14M15M:878951:	ACTTGGGCTTCGTTTCTCTCTCTAATTTCTCATAAGTCAGACACCGT
A01:14M15M:879051:	CAGGTTTATCAACAGCTTTGGTGCTCATTAGATGCGATTTCAATTTA
A01:14M15M:879501:	ACTGCTGCATTCTTTTAAAATTGCTTCTGAAGGAACACTAAGCTGCA
A01:14M15M:879601:	TTTTTTTCAGGTCTGGTGCAATAGCAGGAAACAATTAAAATATATCC
A01:14M15M:887001:	TACATAAGCTATTGCAGCCACAATCCCGCTCAATACTTGATAATTTT
A01:14M15M:923601:	GTGGGATTTTTCCCGATAATCGGTTTCTGGATAGATCTAGTGATTGA
A01:14M15M:923751:	TTTCTCCTTCGAACCTGTTTTCTGAGACATTGATGGTTTTGTAGATA
A01:14M15M:887501:	CCGACTTACTATAGTTTGAGAAGCTAACTCCTATAAACCTTTGCTGT
A01:14M15M:887601:	ATCTGATGGCAAGGCTCCAGAGAAGAGATTTTTAGAAATGTCAAAGA
A01:14M15M:928351:	TTGAACTTCTCAAAACACCGAGGTATAGAACCACTGAAGTTGTTGTT
A01:14M15M:882201:	CACCCGAAAACTGATTATCTGAGGCTGAAAGAAACGTTATTGATTTT
A01:14M15M:882301:	TATTTCATTTCTTTGAAAAACATCCGCTGGTCCATCAAAACCAGTAA
A01:14M15M:888451:	ACTCTGGTACTTGCCCTTTGATTTGATTGTTAGAAATATCTAAGTAA
A01:14M15M:888551:	CGCTAGAGCCAGTGATCCAATGGGCGAGGGAAGATTGAGAGTTGAAC
A01:14M15M:888801:	TTTGAAATAAATCCCGGGATTGGCCCATTAAGACTGTTTCCTCCAAG
A01:14M15M:888901:	CGCTGAAGCCATTCCTTTCCAGGTTAAGATGGATCAACGAAGGAATC
A01:14M15M:889051:	GCTGGTTAAAATGAAGGTTGATTGTAGTGAGCTCGGTCAAATTGAGT
A01:14M15M:889151:	GAGTTGGTTTAGGTTGCCCATCAAATCTGGTAGTTCACCGGTGAAAT
A01:14M15M:889251:	GGAAGCTTTCCAAATAAATTGCATTCAAGAAGTTTCAAAACCCTCAA
A01:14M15M:925801:	CCCGTCTTAGGATCACAAGTGATACCATCCCAAGTACAGCAATCAGT
A01:14M15M:929801:	GCTTTGGAGGAGAAGAAGCCCAAACAAGTATGGAGTGAGAAAGAGAA
A01:14M15M:889751:	AAAATCAAATATCGACTTAACAAGTCTCGTGAAGACTTAGAACAAGT
A01:14M15M:926201:	AGTAGTAATTTAAAAAGTATCCCAAGCGACAAAACACTGTTTTGTCC
A01:14M15M:889951:	TTTTTCTGCCGTGTGTTGTTGTTCAATCAATTGCCCAAACGACGCTA
A01:14M15M:890201:	AAGTGCTTTTCATCAACTAATGTTTGTAGTTGAAGTTGTACCTACAG
A01:14M15M:926901:	CCAACTTTACTCATTTTGTCATTTCGTGTTTATGTGATAATCCAGAA
A01:14M15M:880651:	GGCCACGGTGATGACTCAGTTCGTAATATAGATCATCAGTTACATAT
A01:14M15M:927151:	GTTCTTGAAGACAGAGTTGGGTCGCAACACGAATTGAGATGCATAGC
A01:14M15M:899801:	GTTCCTGCGACAAGATTTCAGACACAAAAAAATATAAAGGGAAGGAG
A01:14M15M:899951:	ACTTTTCACGCCATTACAATGGTAATTTAAAACGACATAGAGATGAT
A01:14M15M:927851:	AACTAGTACCAAGCAACTTCATCTCCAAACCTTTGTTAGCCAGGACC
A01:14M15M:887601:	ATCTGATGGCAAGGCTCCAGAGAAGAGATTTTTAGAAATGTCAAAGA
A01:14M15M:928401:	TAAAACAAGTGTTTCAAGAGAATCCAGTTGGCAAATTGTCTTCAGAA
A01:14M15M:882351:	AATTCAGAGAAAAGTCTACATACGCTAATCCTGGGAGACTCCATAAC
A01:14M15M:928751:	CTAGAGCCAATGATCCAATGGGTGAGACCATATGGAGAGTTGAACTA
A01:14M15M:882601:	GAAGAGACTCATGTCGACAATACTTCTTGTATTAAGAGTGGAGATGT
A01:14M15M:901801	CACTGAGCCTGTTTCCTCCAAGGATTAAAGTTTGAAGTTTTGATGGT
A01:14M15M:901651	AAAATGAATTTGAACCAACATTAAAGTACTCCAGTTTGGAGAAGGTA
A01:14M15M:883101:	GTTGTTTTAAGTTGCGGATCGAAACTGGTAGTTCACCGGTGAAACCA
A01:14M15M:902051:	TCCAAATAAATTGCATCCAGAAAGTCCCAAAACCCTCAGATATTTGA
A01:14M15M:883351:	TAATGGGCCATTGAGAGAACTGCTCCAGAGATTTAAGTCAAGGACAT
A01:14M15M:889501:	TGTTCCTCCACCTCTGCGTCTTCTCACTAGCAGCCAGCCCACTGGGA
A01:14M15M:902501:	CCTCTGGTCTTGACGGCACAAGTGCTTAGGAGGTGAAGAACCGCAAA
A01:14M15M:902701:	AAAGTGGAGAAAAAGCTAGACTTATATAACAAGTCTCCTGTGAAGAC
A01:14M15M:930151:	AACCAGAGACATATTTTTCTTTATCCCGCTTTTAACGTGTTACCGGT
A01:14M15M:878801:	AATGCAATTCAGATAGAACCCCTCACTGAGAAATGACGTGTGATTGG
A01:14M15M:939151	TGAGGAATTGAGAGAGCTCACCAAAGCTTCTGCGCAAAGAATAAACA
A01:14M15M:900651:	TAAGGGTGGGAATAAAGAAAATTATGTTTGTGAATTGTGGCTGCAAA
A01:14M15M:883551	TTCTCTTTCTCACTCAATACTTGTTTGCGCTTCTTCTCCTCCAAAGC
A01:14M15M:902401	CGAGAAGACACAGACCTGGAGAAACAACAGTGATTGCTGTTCTTGGG
A01:14M15M:883351	ATGTCCTTGACTTAAATCTCTGGAGCAGTTCTCTCAATGGCCCATTA
A01:14M15M:889301	CCAGTAATCTCGCCGGTATTCTACCAGATTCTATTGGTAATCTCAAA
A01:14M15M:901551:	TCAGCGGGAACTTTCATCAAGCGCTACTCAATTTAACCGAGCTCACT
A01:14M15M:929101	ATGATCTCTTCGTTGACCTATCTTAACTTGGAAAGGAATCACTTCAA
A01:14M15M:882751	TCCTTGGAGGAAACAGGCTCAGTGGGCCTATCCCGGGATTTATATCA
A01:14M15M:928801	CATTTCGAGTCACTTTACTTACTAAGTCTTTCACGAAATACTGTGAA
A01:14M15M:928251	CAGAGGAATCTGTTAGCGTCGGCTTGATTTCATTAGACGTTGGTCAC
A01:14M15M:927901	AAGCAGCAAAGGTTTATAGGAATTGTATTCTCAAACTATGTTAAGTC
A01:14M15M:923501	TTCGAAGGTCCAATACCACAAGGCACTCAGATTCTGTGAGAAATGGA
A01:14M15M:927451	TGCAGTGGAGGAGAAGAAGCTACAATAAACAAAGATGAAGAAGAAGA
A01:14M15M:886951:	CTATATGAAATCAGAATGTGGCTGATGACCAATCCACAGAATACACC
A01:14M15M:927901:	GACTTAACATAGTTTGAGAATACAATTCCTATAAACCTTTGCTGCTT
A01:14M15M:951:	GACTTTTTGTAATAAAACGACAAGAAAGCTAACTTCATGGACTATGA
A01:14M15M:1051:	GCAGAGACGTTGAGGTTTTGGTTGGTCCACGTCAACCAAGAAATCCT
A01:14M15M:5101:	TCAACTGATTAGTCTAGCAAAGGTCCAAACCTCGCCTCGAAGACATG
A01:14M15M:7851:	ATAATTCAGTAGGTCAGGTCTCAACTTGCGTCCACCGAGTCCAAACA
A01:14M15M:8401:	GTCCGAAATGAGAAAACGTGGGAGAGAAACGCTAACCGAACTAATCG
A01:14M15M:10251:	AGTTCCGAATATCTCTTCAGCTTTCCTAAGCGTTTCCTGCAAAACAA
A01:14M15M:10401:	GGCATTAAGATCCTTCACATTTCCAAGAAATGCACCAAACTGCTCGT
A01:14M15M:10701:	CTCTGAGATTGAAATAGAAGATCTATTATCATCAAACATGCCTCTAG
A01:14M15M:10801:	TTAGGGGTACTTGAAGCAGATAATGCTGGTGGAGAACCAGGAGGAGT
A01:14M15M:11051:	AGCTTCAGAAGCTTGAGACTGGATTGATGAATGTCTTGAAGGTTGAA
A01:14M15M:214951:	GCCAAAACAAAATCAGGATTTAAGAGTAGTTCTACATTAGGATTTTG
A01:14M15M:11351:	GCGTCTTCCTGAAACCCTCAAGCTGCATCAATCAAAAATCCATTGAA
A01:14M15M:11451:	GTTTAAGTCCAAACTTTTACCTTAGAGACATCTCTCTGGAGTCTCTT
A01:14M15M:11651:	AAGCTTTTGCAACGCGTCGGAGAGAGACGAGTCAAGAGACTCCACGT
A01:14M15M:11751:	TCGGACGACTCTGATTCGAGGGCAGAGACACGTGTCGAGAGAGCAAT
A01:14M15M:11901:	CTTGATGTTTCTTCTTCTTGTTCTACGTCTGACATTCTTTTTCTTTT
A01:14M15M:12251:	TGTGGTCACGTATGCGTTGTCTTTTGTGTATTTGTGATATTACAATG
A01:14M15M:76451:	GCCCGGAGTGGTCCGACGTTGTCCCGTTGAGTCAGGACGATGGTCCG
A01:14M15M:76551:	CTTCCGGGCGATTTACCGCTCCGACGAGCGTTCTCCTCGCGCGCTGC
A01:14M15M:77351:	GAACTTGACTTTACTCGGAGCATACTATCAGTTGATGCCAAACATTA
A01:14M15M:77901:	GAGATACCTGAAAGCCCTTTACAAAGACGACACAAAGTCTTGGATTA
A01:14M15M:78451:	TTGTTGGACATGAAGGGAGAATGTGGTCACGTAATTGCTCTGTCTTT
A01:14M15M:78551:	ATTTGTGATAAGTGAATGGTCAGACTTATAACTCGTAAGATCCTTGA
A01:14M15M:79351:	CGCTCACATCTTCCCCGTGACAGTCACAGTTTACTATTTTATGGTGA
A01:14M15M:79551:	TGGCCATACGTTTCCAGATATGTTCAGATATTGAAAACGTTTTCAAG
A01:14M15M:80051:	GAGTGGACACATTGGCTAATCATAACCACATCTACATACCATCCACT
A01:14M15M:80501:	GCATAACGAAGACCGGTATGCATGGTGGGACAAAAGCTCGAGCCGTC
A01:14M15M:80751:	AGAGGAGTGTAAACCGGAGATGTATACTTGGCTTATCCTCTCAGTTG
A01:14M15M:81001:	TTGGTGGTTGAAGGCCTAATTAGTGAACCGTGAACATTTTTGCGTCG
A01:14M15M:81101:	TTTCGCAATTATACAAAAGAATCCGTGACGAATTTGTCTATTGGGAG
A01:14M15M:82951:	GAGATCAATGTGCGTTTATTTTCCCAAACGTTTATACTTCATTTGAT
A01:14M15M:85151:	ATACACCTGAAGACGCGACTGCTGCTAGGAAAAACGGAGCTGAAGGG
A01:14M15M:85951:	AGGAAAGTTGCAAAGAAAGTGTTTGTTGAGAAGGGTCAGACCGTGAC
A01:14M15M:86251:	TTTACAGCACGACCCTTTTGAGGTATGCATACAAAAAATAAGACAAC
A01:14M15M:88051:	GAGTCATAGTCATAACAAACAAAGCACAGTATGATCTGGGACTCATA
A01:14M15M:92051:	GGAGATTCCGGTTTAGTTAACTTGGGAGATTGGGAAGAGACGGGTCT
A01:14M15M:92151:	AACGAGGAGAGATAAGGGTCTCCATGTTTTTGGAGCACAAGAGAAAG
A01:14M15M:92601:	CTTTTGTTTCTTCTTTCTTTTCCTCTCTGTTTTCGTATCCAACCGTG
A01:14M15M:93001:	TGGTCGTGCAGCTGGAGTCGTTACCAACTGATTGTGATGCGTCTGTA
A01:14M15M:93301:	TAACGGATACATTGAGAGATGCTGTTGATGAAAAATAGAGAATCACC
A01:14M15M:93401:	TGAGAATGGTAGAGGCTACACACAAAAAAAAACAGAGAACAAAGGGC
A01:14M15M:93601:	TCAAGATCGTTTGTTTTTTCTTTCGAGATGGTTTTGAGAACAAACTC
A01:14M15M:93901:	ATTCTCACCTCATATTCAGTAATACGGTTCTTTTCATTTTCTGCTAG
A01:14M15M:94001:	TCTTAGCTAAACCTGTAACACCTTCTTCTGTAATTTCCTCCTCGGAT
A01:14M15M:94101:	CCTCTTCTCCTTTTCCTCCTGAGATTTTTTTCAGCAAAATTTAAATG
A01:14M15M:94201:	GGTTCTTCAGTACGGTCCCAGCGCCGCATGGAGCGGTCATGAGATCC
A01:14M15M:94351:	TTCACTAGTCGGTCTTTCCCAATGCTGAACATGTAATGTGTATTGCG
A01:14M15M:94551:	TAAGGGAAGTACCTGTCATCGTGAGCAAAGATGGACTTGTGACAATC
A01:14M15M:94651:	TCAACGCTCCATCGGATGAAATGTCAATGCACATGACAGGCAACTTG
A01:14M15M:95401:	CGAACCCAGTATCATCTGGAATGGGTGCAATTGACCAAATAGTTCCA
A01:14M15M:95501:	GAGTATTCCACTCTTCGTTCCAACAATACCATACTTACTTTTTGGGA
A01:14M15M:95601:	GTACTAGGATTCCAAATTTTCACCTCACTGTGACTGGTTGACATCAG
A01:14M15M:95701:	GGTGCTCAATGGTAGCAGTTTTCTCGTTCTCGCTGCTCTTTAACGTA
A01:14M15M:95801:	TTTTGGAGTAATCGGACAGAAAGAGAAAGAGCTTATTTTTCTGCCAG
A01:14M15M:96001:	CCAACACCTGGAATATTTCGACTGTTTTTCCTGCCATTTGACAAGCC
A01:14M15M:96101:	TCTCTGGATCTCCCCAAACGGTACCAAAACTTCCCACTTATTCTCGG
A01:14M15M:96201:	GATACATGTGGCATGTTTTGTTTAACAGCGTAAAATCGAAGTTCTTG
A01:14M15M:96301:	AGACTTCAGTGTGATGACCACTGATTATCTGCATACAGTGCTGGGTC
A01:14M15M:96401:	ACCATCATCCAAGAATACAAGATCGGTCACCTACACCAGAAACAAAC
A01:14M15M:96601:	TCGTTGTCTTTACTCCCAGATGCAAACATAGAACCAGCCTTGTTGTA
A01:14M15M:96701:	CTTTCTCAGAATCCCATATCCTTATACTCCCATCTGCATACCCAACT
A01:14M15M:97051:	ACTTTCCGACGCGAGAGGAGGAAGGAACTAGGGTTTTGGTGCAGATT
A01:14M15M:97201:	CAAAGGAAGAAGCTTGCTCGTATCTTAGGTACGCCTTCACCATTGTT
A01:14M15M:97301:	TTTCGATGGTTGGGGTTTTAATTAGGGTTTTGGGAGAGAGGCGAGCT
A01:14M15M:100201:	GATGGAAGTGCTCTAATGGAATAAGTACTTGGGATCACGCAACTAAA
A01:14M15M:101501:	TCATGAGGGCTAAAACCATAACCTCTGATATCAAGGGAGACATCTCT
A01:14M15M:101751:	AGAGGTCGAAGATAAAGGAATGATCGTTGAATGGTGTCCACAAGAGA
A01:14M15M:101851:	TCAACCGTAGAGGCTCTATCTTCTGGCGTTCCCATTGTTTGTCTACC
A01:14M15M:101951:	CAGGAGTAAGACTTGGCCGCGGAGAGGCTGATGAGAAGATTGTTTCA
A01:14M15M:102051:	GGAGCTGAGAGAAAATGCTCGGAGGTGGAAGAAGGAAGCTGAGGCTA
A01:14M15M:102151:	TTGGTTGCCAACATCTGGTGAGAGAAGATACCGGGAAACACTTATCA
A01:14M15M:100751:	AGATGGAATCGTCGCTGACTCATGTGATGCTTGTCTCATTCCCATCA
A01:14M15M:100951:	TTCCTCCGGTTTGAGTTCTTTGACGATGGGTTTACTCTCGACGACTT
A01:14M15M:101401:	TCTGTTCTCATAGACACTTTTGAAGAGCTAGAAAGAGACATCATCGA
A01:14M15M:102101:	TGGGGTATGGTGGATCATCTGATAAAAACTTTGGAGAGTTTGTTGAT
A01:14M15M:135251:	GAGAAGTATCGAAACTCGTGAGGAGATACGAGGAAAAGAAAGAACCC
A01:14M15M:101301:	GAAGCATGACGAGATCCCAAGCTTTCTTCACCCTTCCTGTCGATTCT
A01:14M15M:101601:	CGTTTACATCTCCTTTGGGACTGTAGTCCACGTGAAGCAAGAGCAGA
A01:14M15M:124251:	ATGGGTGGTCCGGCCTCCTATGGAAGGTTCAAGTGTGAAACCATATG
A01:14M15M:101751:	AGAGGTCGAAGATAAAGGAATGATCGTTGAATGGTGTCCACAAGAGA
A01:14M15M:101951:	CAGGAGTAAGACTTGGCCGCGGAGAGGCTGATGAGAAGATTGTTTCA
A01:14M15M:102051:	GGAGCTGAGAGAAAATGCTCGGAGGTGGAAGAAGGAAGCTGAGGCTA
A01:14M15M:102301:	CAAATGAAGGTTAGATGGTGTTTCATCGTGTTCTACAAATCAAGAAC
A01:14M15M:116951:	CCAATGGGAACTTGGAAAGGGATATGTTTGGTCATAAATTCATGCCT
A01:14M15M:123351:	CCAAGGGCACATAAACCCTCTACTTCGTCTCGGAAAGCTCATAGCTT
A01:14M15M:123451:	ATGCGTCAAGCCAACAAGATTCAAGACGGCGTGCTCAAACCGGTCGG
A01:14M15M:123551:	AAAAAAGAACCAATTTCCAAGCCTTCCGACCACACCTTGAACTTGTC
A01:14M15M:123701:	TGGCTGATGAGCTTCATATCCCTTCGGCTGTTCTATGGGTCCAGTCT
A01:14M15M:124001:	TCGACCACATGTCTAACCTCTGTCCTCAAGTCAAGTTTAGCCCTCTC
A01:14M15M:124101:	CTCCGCGCCAGCGAGTGACTGCATGGAGTGGCTCGACTCGAGAGAAC
A01:14M15M:124201:	CAGTTCGAGGAGATCGCTCATGGTGTTTTGAGCTCTGGTTTGTCCTT
A01:14M15M:124451:	TTCCGATGTGGGGAGATCAGGTGACTGATGCTGTGTACTTGGTTGAT
A01:14M15M:124551:	TCCGAGGGAGGTTGTGTCGGAGAAGTTGCTTGAGGCCACCGTTGGGA
A01:14M15M:124651:	GCAGCCGTGGCGTACGGTGGATCATCGGATAGGAACTTTCAAGAGTT
A01:14M15M:124951:	GATTTTTAAAACCATTTTGATGCATTAAACTAATGTCGCCATATGGC
A01:14M15M:139551:	TAATTCCGCGATGAGAGCACGTGACAAAGATCACTTTCGTGAAGCGT
A01:14M15M:139651:	TTGAGCACATTCCAAGCAGTACCGGCTGCGTGGCCAACCGTGTCTAG
A01:14M15M:141001:	CATTCTAGTTGTAGCTTTGGATGTAGCAGAAAAAGTTTGTCTCTCTG
A01:14M15M:141201:	ATTGAGAAAAAAGCTTTTCCTGGCTTTGACTTCACAATAGGAGCCAT
A01:14M15M:141301:	CAGTAGCTCTGGAAAGTTTCCTCACTCTGTATACTATATGGTTCAAT
A01:14M15M:141451:	GACGACGCACCACTCTTCTTCTCAGCCTTCGTAATCATAGTTTCACC
A01:14M15M:141851:	TGTCCCTCCAGCAATGGCTTTAGCCACGACATTGTTATAATCTTCAA
A01:14M15M:141951:	GAAGACGAAGAAGAGAAACACGAGTTCTCTCTCAAGAAGTCGTCTAG
A01:14M15M:142051:	TGACGCCGTAGCTGAGTGGGTCTCCGTCTTTCACCGGAAGCGTGAAG
A01:14M15M:142201:	CTGAGACCTGTACAAGCTCGAAGTCTCCGGCGGCGAGCTCCACCGCT
A01:14M15M:147351:	TTCACTCTCCTCGCTTTTCAAATCGAGGATCCAAAAGAACGTACACA
A01:14M15M:147901:	GTGGGTTTGCATAGAAGGATGATTGCTGCTGGCTACGAGGGGAACGC
A01:14M15M:148001:	AAGCAATGGCGGTGTTTGGAGAAATGAAGGTGAATGGAGTTTCTCCC
A01:14M15M:148151:	CCGGTCTCGTTGTTTATAACTCTCTCATCTATGGATTGTGCAAAGAA
A01:14M15M:148301:	ACAATAAGCTGAGTGAAGCGATTGATGTGTATGGCTCAATGATTGAT
A01:14M15M:148551:	GAACTGTAAAGGGTTGAAGGCAGATAGCTATACATGTATGTCACTGA
A01:14M15M:148651:	GTGATATGCAAGTCTGATTGCTCTCTAAACCTACATCATTACACTGC
A01:14M15M:148801:	TATTTCAAGTATGGTAAAATGATGGAAGCCATGGAGCTCATAACAAG
A01:14M15M:149051:	TATCGGACAAGGGTTTGGTGCCTGATCCAATTACGTACAATACAATG
A01:14M15M:149151:	ACGCATGAAACATGAGGGGATGGAACCAGACAGTTATACATATACTT
A01:14M15M:149251:	TTCAATGCAATACGCAAGTCTGGTCAATCTCCCGACATATTTCAGTT
A01:14M15M:149351:	GACTCTTTGATGAAATCCAGAACATGGGATTGGTGGCAGATGTGGTA
A01:14M15M:149451:	CAGAGCATTGTTCTATGAATTAGAATCAAAGGGTTGTTCACCTGATT
A01:14M15M:149551:	GATGCTGTCCCGCTTCTTGAGAGCATGCTCGATAGGAAATTCACCCC
A01:14M15M:149651:	GTAAAGCTCTTCAGCCACTTCTAGACACTTACGGAGAGAACATTTTC
A01:14M15M:149851:	AATAAGGGCAGCTATGTTTGCTGCTAGGCAAAGGAGTGTTCCTCCAT
A01:14M15M:150201:	GGAACCCAATGGTCAACACCGGAAGCACAAGAAGGAAAGGAGTGGAC
A01:14M15M:150951:	TGTTGAAACGCAGTCCCAGTGACTATGCTTCCTAAAAAAACATTGAT
A01:14M15M:151951:	ATCGTCAAACTCAGAAATCAAGTCAGAGATAGATAGATAATATCAGA
A01:14M15M:152151:	GGAAGGGAGTGATGACTCTATCAGAAAGCACAAACTCAATGAGTGAT
A01:14M15M:153051:	AAAGACAGCAAGAAAGAAAGAAACACACAGATTCAGACAAACTTTGA
A01:14M15M:153201:	ACCATCTGTCACAGTCACAAAGAACACTGAAGAAATCAGCTTTAGTA
A01:14M15M:153551:	GAAGATGCTGTTCAGAAAGAAAGAAAGAAAGAAAGAGACCGACGAGT
A01:14M15M:153651:	AATTAAATCGGAGTGTGTCTTTTGGAATTGTCTCCCAACGTTTCTTT
A01:14M15M:156101:	AAACTTTATGGCAAAACCCAAACCGCATTCCCGTTTAATAGTTATAT
A01:14M15M:157551:	TGCCATGAACCACAAGTACGTACTCTCATGTTCAGAGATCTCTCTCA
A01:14M15M:163751:	AATCCCAAGATCAAGGTGTTTGAACTCACGTCGTGTGAAGACCGCTC
A01:14M15M:164001:	AATCTTTTCTTGATGTGATGCATTAGGTGTTCACAACTTGCGAGGGT
A01:14M15M:164751:	ATAGAGACCATACTTGCCCGTCTCTCCAAGTGGAATTACCCCGATCT
A01:14M15M:165701:	AAGTTCTTACGGTCACCAACTTGTATAAGTTTCTGAGTTGTTTAGTC
A01:14M15M:173401:	GTGTCCATGTCCAACCAAATGGTCCTCAATAAAGACACGAACAGTTT
A01:14M15M:173651:	AGAATGAGTACAATTGATATCATACATGTATGCATGCAGTTACCTTA
A01:14M15M:174501:	TCAACGTTGAACGCACGGAGTCTGGTCAATGAACCAGGTGTAGCATC
A01:14M15M:174751:	TTGCTGGTTGTGATGCGTTGACGTTTTCTGTGTTGTTGTCGTTAACT
A01:14M15M:174851:	TTGCGTTCCCATAGAAACAAGAGAGAGGGAGGCAGAAAGAGAGAGAG
A01:14M15M:174951:	CTTTGGCCCCTTTGACACAGCCCCTTTATATATTTATTATAATCTCT
A01:14M15M:178151:	TTGAAAGTGTTCAACTAGCAGAAGTTTTCCCAGTGGCAAGTGTAACC
A01:14M15M:179051:	TCAAAGTCAGACTCTGAACCGCTTGGTGCCAATGGCCCCGCGTGTTC
A01:14M15M:179251:	TTTTTACGCAGACTCGAACCTGAAAATGCGAACTGTTGATGCATCTT
A01:14M15M:179901:	CAAGCAGGCTCTAAAGCAGGCTCCTCATCATCACCAGCATCAAGTGT
A01:14M15M:180201:	ACGTCTCTGAAGCTAGGCAGGGCTTCGTAAACCCCATTGGTGGCTCT
A01:14M15M:197451:	CCTTGACGTCAAGACCGCCGTTTCTGGCTCCTACCTCCATATGTGTG
A01:14M15M:197551:	TAACAACTGGGTTGTTACGCTTCGGACATGCTTATGAGAGTCTTTAC
A01:14M15M:197701:	CGAGATTATAACTTTGGCTCCAAACAAGCTTGTCCGAAAAACTGGCC
A01:14M15M:197951:	AGCATCATGAGGTTTCATGAACTCGAAGGTCTTTCCGATGATTGGAA
A01:14M15M:198051:	TAAATCCAATGATAAAGCTTCACCACTATGAGTGAAAGTATCAGAGT
A01:14M15M:236101:	TCCGAACTCTCCAACTCTCTATCTATGACCACTTCCTCCCTCCCATT
A01:14M15M:236201:	CACTTCCCACAAACTCAAGACTTCTCTGTCCGAAACCTTGACCAAAT
A01:14M15M:236301:	GGAGCTGTTTTCGTCGACGCTCGTGTCGATAACTGTTCCCTCTCTGG
A01:14M15M:236501:	TCACAAAATCGCCGATGCAGCCTCCATGTCGACTTTCATTCGGACTT
A01:14M15M:236601:	GCCGCAGCGAATTTTTACCCACCAGCCAATGAGACCTATAAGCTTCC
A01:14M15M:236701:	GTGCAGCTAAGTTGGAAGAGCTCAAGACCAAAGCCACTAGTCCAGAA
A01:14M15M:236801:	CTTCGTCTCTGCTTCATTCTTAGACACTTGTGGTCGCAAAGTTCTGA
A01:14M15M:236901:	ATCGGGAACGTCATGTTCTCCTCTGTGGTATTAAGTACTGGTCAAGG
A01:14M15M:237101:	CGAGACACACGAGCCCTACACAGTGAGTAGCTGGTGCAAATTACCAC
A01:14M15M:237201:	GCTCCCACGTTTGAAAACATTGCCATGTTGATCGATTCCAAGGACGG
A01:14M15M:237301:	AGCAGAACCCGGAACTTCTCGCCTTTGCTTCCTTGAATCCTTGTGTC
A01:14M15M:238101:	CTCTGTCCGAGACTCTGTCACGTTTCTACCCTCTAGCTGGACGACAA
A01:14M15M:238251:	TTGCAGCATTCCTCCCCGAGATCGAGGAGGGAGAATCTGCTGGGACG
A01:14M15M:238451:	TGTACTCCTCACTTTGCAGGAGCCACAATATACCCTCCTCCAGATAC
A01:14M15M:238601:	AAGGCGGCTAGCGAAAGCGTCCGGGCACCTACGCGCGTGGAAGCCAT
A01:14M15M:238801:	CTTTGTCAAGAAAGGGGCAGAGAGCGAGTTAGAGATCGACGAAATGG
A01:14M15M:238901:	CTCCAAGGGTGCGATAATGATACTACTAACATCACCACCACCACACT
A01:14M15M:238601:	AAGGCGGCTAGCGAAAGCGTCCGGGCACCTACGCGCGTGGAAGCCAT
A01:14M15M:238851:	CTGACTTTAGAAAGACCAAAGAAGAATTCAGCGAGATGATCAAAGAA
A01:14M15M:238951:	CCAGAACTTGCTGACTGTAATGGGAGATTTTGTGTCGGAGTGCTACA
A01:14M15M:238301:	CCGTTGCTGAGAGTCAAGGTCAGTTTGTTCGGGTCAGGATCTGGAGT
A01:14M15M:238851:	CTGACTTTAGAAAGACCAAAGAAGAATTCAGCGAGATGATCAAAGAA
A01:14M15M:239101:	TACCGTCTACGATAACATGGTGTTCGTGGTTCTGATAGATTCAAAGG
A01:14M15M:239201:	TTCCTATGTGAGCAAGACTTGCTTGCTTATGCCGTCCTAAATCCTCC
A01:14M15M:246001:	CAGCACTGGTCCTATAGGGTAAGCGCGAGGAAGATCACCACCGTCAT
A01:14M15M:246351:	ATTCATCAGCTACATCCATCATCGAGATACAGAACATGTCGATGACG
A01:14M15M:246451:	GACTGCATCTCGCACTTGTGGCTTTTGATTGGCGATGTAGACTTGAG
A01:14M15M:246901:	TGACCGATTCCTGGCGACGGGATGAACACAAGCTCCATCGTCATTTT
A01:14M15M:250601:	AGATTGCAAGATTTCTGATAGGAGAGTCGCCATGGGAATAGAATATT
A01:14M15M:251451:	TTGGACTCTGGTAAGACGACACTGAAATTATCTCCGACAAGAAAACG
A01:14M15M:251551:	CAAGAAAATTCGCAGAGTGGACCCATCGATCGCATTTCCTACAGAGG
A01:14M15M:251651:	GCTTACCGGAGCTCTGATTCTCCGGCATCCTCCGTCGTCTCTTCTTC
A01:14M15M:251951:	TGCATTGCCATGCACAAGTTCCAAGAACAGCTTCAAGTTGACTCGTT
A01:14M15M:252401:	GTACTCTCGTTTAGCCTAGAACAATTCACCACCGAGAAAAGAAAGAA
A01:14M15M:252551:	GAGTGTTTTCTAGTCACTGTGCCCGGTGGTTAAGTAGTCAACCTTTT
A01:14M15M:253401:	TGTTTCAATATAAGTAAAGCACGTTACACCCATCTTAGCCCGAAGTA
A01:14M15M:253501:	TTGGCCCGATTTTGGCTTTTAGTTTATTCGATTATGGATTCTAAAAT
A01:14M15M:257851:	TCATCCCTCGCCCGCTCCCTATCCGTCTTCCCCACCCAACGCCGCCA
A01:14M15M:259101:	AGTGTGTGCTATGATTCTTCTAACACAGTGACTGTTTCAGTTGTGTG
A01:14M15M:259301:	GCTTGTCTTTTTCTTGGATGGTTTAGGATCGGATGGAACTGGAGGGA
A01:14M15M:259951:	GAATAAGTCTTAGATCCTTCCTCTGTAAATATGGTTGTGCAGGCGTT
A01:14M15M:278801:	GTTAGGCCCTGTAAAAAAAAAGCGTTCATACGTTGGTCGGAGCCTTT
A01:14M15M:279051:	CGAGGCTCACGGTGGCGATGATGTGGTAAGTTCATCCTCCTTGCTTC
A01:14M15M:279251:	AACGTGTTATTTTTCTGATAGGCAGAACAAACATGGATACATTGTAG
A01:14M15M:279451:	AAGAAAGCTGATCGGTAAGCAAAAGAGAAAGAAAAAGAAAAAGAGAA
A01:14M15M:279601:	TCAGAGTTATGACCTTGTTGCACCTTCAAGCTCTCCTTCATATTCGC
A01:14M15M:279701:	AAGAGTATTGTTGCTCCTAGTCAAAGTGTTCCAGGTCCTCCTCCTCC
A01:14M15M:279801:	CTTCAACCGCTGTGTTAACGTTTTTTCTAGTTGCATTGCTCTTCTTA
A01:14M15M:279901:	AAGAGATGAAGGACCACTTCTACATTTATCTGATTTATCAGCTGGTA
A01:14M15M:280101:	AGAAGAGATCGTTTCTGTCTAGAGTATCTCTAAAGAGAAACCATCAT
A01:14M15M:280201:	AAGATCATCAGGAGCTCCTCCTCTTCCTCCTGTGGCTCCACCACCTC
A01:14M15M:280301:	CCAAAACTTGTGCGTCCTCCACCTGCACCACCAAAACGTCAAGGACG
A01:14M15M:280901:	CCTTTTGCGTTTAAACGTATAGAGTCGCTTATATTCATGATATCGCT
A01:14M15M:281351:	TCTGACGTCAAAGGAACTGATGGCAAAACTACACTATTACACTTTGT
A01:14M15M:281651:	GCGAGGGAGTTTCTGAAGACGATGGACGAAGAGAGCGATTTCGAGAA
A01:14M15M:281901:	CGATGATGACATCCAGCAAAAATCATTCGAGTAAGAAGGAAACAAAG
A01:14M15M:282001:	CATTGCTGAACGGAGAGCTGACAGTTCGGATGATTCAGACAGTGACT
A01:14M15M:282251:	AGATACAACCTAGTCAAATGATTCTCCTCTATGAAAATTATGTGAGC
A01:14M15M:283051:	AAATCTAACGGGCTAATTTGTACAGGAGAAGACATAAATGACTTGTA
A01:14M15M:283151:	GTCTTCTTTTATCATCCAAATCATACGAAATAACTTACCCGAACTTT
A01:14M15M:283901:	CATGAACTATTGAAAGAACCCGCAGAAAGGTAAAAAGGAATGATGTT
A01:14M15M:287251	AATTCGTTCCTTGCAGGAACTGGTGCAGGATCAGTTTTGTTTTCCTG
A01:14M15M:286401	GCGACAATCGTGTACTCTTCAATCAGTTCATATTTCCTTGTGACTGG
A01:14M15M:286301	CAGAATCAAAGGATTCGTCTGCTGTAAAATATTTTTCAACACGTGAG
A01:14M15M:288601:	CGTGTGGCAAGTTGGATAAACAGTATGATGATTCGGTTCATCTCTTT
A01:14M15M:288701:	ACAAAACTAGTATTAAGGAAAGCAATAAAAACAGCTCCTACCTTTAC
A01:14M15M:288801:	AACAAACTGAGGGCCAAAAACCAAGCACATGGGAAGAAAGCGGTTAT
A01:14M15M:290301:	AAGAAACAAAGGAAATAGCCACCCAAGTTCAGAAACCGATAATAACT
A01:14M15M:291451:	GATGGCCATTGCCTTGGGCTCTGAACGTTCCCACGACTCCTCATTTA
A01:14M15M:291851:	TAACTTGCCTGAAAGGAGGAGAAGCAAATAGAGAAAAAAATCATATC
A01:14M15M:292001:	AGCGATAAAAATAAGCCTATCTTAGGTATGGCATAGAAGCCCCATGG
A01:14M15M:292251:	CCCACTACAGTATCATTACTATCTGGTATGGACAATGATTCAGGCAA
A01:14M15M:292651:	CCATATCTACCTCCATCGATGGCAACTCTTCGGTAGTTGCTTCACCA
A01:14M15M:292851:	CTATGCCTTTGCTTATTCTCAAGCTCCATACCAGTCTGAGAATCCCT
A01:14M15M:293151:	CTTCTATCCCTGTGGCCATGGTACCTAGACCGGTCATGTGGGGACAG
A01:14M15M:293301:	GATGAATAGGAATCTCTGTAGTCTCTCTCAACAGAGTTCCGTGAATA
A01:14M15M:294101:	TTTTCTATATTTGGAGCTCCCATAGTCCCCATTATCCGCATAAAGAT
A01:14M15M:294351:	CTCCCGCCGGGCGGGGTGCGTTCATGTTCATAGTCATAATCATATTT
A01:14M15M:294451:	CATCCTTTACCGTATCCATCTTATGCCATCTGTCTGGAATGAACTCC
A01:14M15M:294801:	TGCAAAAGTTCACTCTTTTTATCCTGCTCTTTCTTCAGGACCTGTGA
A01:14M15M:295001:	CGGAAGCTTATCACTAGTTGAGATTGAAGTGTGACCATTCTCGGGAA
A01:14M15M:295251:	AAACTGAATGTAGGGTTCTGCCCAGAGCGAGAATCTGGAAACCCTAC
A01:14M15M:295401:	AAAAAACCCTAGAATAGAGCTGGGAGGAAGACGAAGGAACGTGAGAA
A01:14M15M:295501:	AAGGAAACCCTAGAAAGCTCTCGCTAAATCTTAATCTGGTTGTTCCC
A01:14M15M:295601:	GCGCTTCTCTTCTGAATCGTTGTGTTCTCTCTCTCTCTCTCTCTCCG
A01:14M15M:302901:	GGCGGACATGGCGTCTCTGGGGTTGGAGTTGGCGGTGGTGGCGGGGT
A01:14M15M:303001:	TGTACGGAGGTGGTGGCTTGACGGTGGGCGGTTTTGGAGTGTAAGGT
A01:14M15M:303101:	GTGATGAGGTGGCTTGACGGTGGGTGGTTTGGGAGTGTGAGGAGGTA
A01:14M15M:303151:	TTGGGGTGTGATGAGGTGGCTTAACGGTGGGTGGTTTTGGAGTGTGA
A01:14M15M:303151:	TTGGGGTGTGATGAGGTGGCTTAACGGTGGGTGGTTTTGGAGTGTGA
A01:14M15M:313601:	TTGATGACTATCCTTGGAATTATTTTCATATCCATAAAGTTGTCCTG
A01:14M15M:314101:	TGAAGACAGCCCATCCAAAGCAAAGAACTAAAGCCGAATCAAGTTTC
A01:14M15M:314201:	AACCAGCTCTAGCGGAATTGGTATCTGAAGATGTTGAAATTCCCCTT
A01:14M15M:324901:	GATCATAAATTCTACATCAGTGACATTTGAGTCATAGAAACAAGTAG
A01:14M15M:325151:	TCTGCAACCTCATCCTCATCAGAAATTTCTTCGCTCTCATCATCCTC
A01:14M15M:325301:	CACTTGAAATCTCAAAAGTTGAGAGAATCAATCCTTTTGCTTACCAT
A01:14M15M:326301:	CTCTGTCATCACGGTCTTTCCTTTGAATTTGTTTGTGATCTCGTCGT
A01:14M15M:326551:	AGCTGTTTCTTCTCCTGAAACCTTATCGTCACCGTTAATGGCCATTC
A01:14M15M:326701:	TTCTAAATAAATAATGATCTCTCATTTTCAGACAGAACTGAGATGGG
A01:14M15M:340551:	GAAAGAAAGAAAGAAAAATACGCTCACAGGTTTCCATGTAGAAGTCA
A01:14M15M:341651:	ATCTCCGATGATGGAGCATAGCCTCCTCCTCCTCTTCCACCGTCTCT
A01:14M15M:341751:	GATGAGTACTCACGTGGTTTGATGACGAGACCATGTACTGTCGTTGT
A01:14M15M:341851:	GCCGACCGAAGAAGCTCCGGCTGTGGGTCCCGACGAGGTGAGGCTAA
A01:14M15M:341951:	TGGACCATGGCTCTGAAGTTGGCTGTGTCGGTGTTGAGAAGTGTAGT
A01:14M15M:342051:	GGCTTTCAGGGTTAACGGAAGAATCAGCTGACGTGGAAGCGGTGGTC
A01:14M15M:342601:	GAGGTTGTCGATTTGCATTTCTTTATTCTTTCGCATAATGTAATTCC
A01:14M15M:345151:	GGTGATGGATCATTGGTGTTATTTTCTCTGATTCAACCATATATGTG
A01:14M15M:346951:	AGGAGATTCAGAGAGAGAAGAGAGAAGATATTTTCTCAGTCCATTTA
A01:14M15M:347251:	TTTATATGTAATAAAAGGTGATTGCTATCACGGTGTTCTGCTTGTTG
A01:14M15M:347351:	GTTCATTCTCCTCGGTCTTTACTCTCCTGTGGTATGTTCTTTACTAT
A01:14M15M:347501:	CAATCCTGCGGATCCAGGAATCATGTCCAAATTCGAAAGAGGAGGTG
A01:14M15M:347651:	CTCTACTTTACCAGCAAACTCTAGCGTCAAAGGCTCTGTTGGAGACG
A01:14M15M:347801:	AGATGAACAGCAAGGGGACAGGGAAGAAGCTCTCTTTTGCACCTTGT
A01:14M15M:348101:	AAGAACTATATCACATTTATATTGCTGATGGCTGCCAGTCTTCTCTG
A01:14M15M:348301:	AATAGACTCGGAAATGGATTTTCTCGGACACCTTTTGCTACGGTTGT
A01:14M15M:348451:	TCCATGCTCGCATTGTTTCCATTGGGTGAACTTTTCTTTTTCCACAT
A01:14M15M:348651:	TGGAGCTTCTGTTGATGAGGAAATGCCTAATGTGCTGTACTCTCCTT
A01:14M15M:349001:	TGTCAAACTCAGTGCTTGGAAACTCGCAAAGCTGAATTCAAATGAAG
A01:14M15M:349101:	GAAAACCGTCATGCACAAGACGATGAACTTAGTTCCAGTGGCACCAT
A01:14M15M:349251:	AGCAAGGACGAGTACGAGACGGAGACCCACAGTATGAGCAGTTTCAG
A01:14M15M:349351:	ATACTGCTGGCAACCGCTTTGCTGCAGGGGCCTCATCGAATGCTCCC
A01:14M15M:349451:	GCAGAAAGGAAACAAGGCCGATCCAGTGCTACACCCTGCTCCTGCTC
A01:14M15M:349551:	GAAGCAGGTAGATATGTATCAGTACCTGCAACAACATCTGAGGCAAG
A01:14M15M:349651:	CAAGATCCGTTCTTCCACCTCAAGATTCTTCATCAGGGAAAGCCCCT
A01:14M15M:349751:	CTTCTTTGGAGGTCCGCTGGTAAATATCCCCAACAGAGATGGCCTAA
A01:14M15M:349851:	CCTCGGGAAGCTAGATTCAGAAGAGACACAACCTCAAACCAGCTTCC
A01:14M15M:349951:	CTATGTTCTCATCGATCTGAGACTGTCAGGGTTAAGGACATACATGT
A01:14M15M:350151:	GGGTTTAGCCTTTCTTACTTCATTGCTTCGTATTCGCTTTAAGGACC
A01:14M15M:350401:	GTGCAGCAGATTATAACATCCTTCGGTTCAATGTTAACCTAAAGTCA
A01:14M15M:406051	TGAGAACTCTAAACGTGATACTTGAGTTTTTCTATGCAGCTGCTTGT
A01:14M15M:392351:	ATTAGGATAACCAAGACCATTGCTCAATACTTCAAATCTGAACATGT
A01:14M15M:405701	TTTCTCAGCCTCCTCGACCTTGTACCCATATAAAACGTTTATCTATC
A01:14M15M:392701:	TAGAAATGGAAGTGAAAGGTCAAGTGATGTGCGTGTTGTTGATGTGT
A01:14M15M:392801:	GATCTCGTCTAAATTCGGAGATCTAGAAATCGAGAAGAAGCTAAGGA
A01:14M15M:377501:	ATTTCTTCAAGCAACCAGCATTTGATCACCCTTCTATGAAAAATCAC
A01:14M15M:393351:	GTGACCCGTATTACGACCAACATCATGTAAGTTACTTCGTTTAGTTA
A01:14M15M:378001:	TTGGATTAGTTTGCGGTGGGTCGGACACCAAACAAAGGAATGGTCTT
A01:14M15M:393551:	GTATAACCGCCCCTAAGGTTAAGCCTAGCCAATTCAGTAGTGCTCGG
A01:14M15M:393651:	TTTACTTTTCCACTATATAGTACGTACGCTACAAGCCCCAGTTACTA
A01:14M15M:378301:	ACAAGGATGACCAACCTCGGCTTTTCGTCTATACAAAAGTAAGACCG
A01:14M15M:378401:	GTGACAAATATGTATATCGATGAGACAGGCCGGTGGACAACAATGTT
A01:14M15M:393951:	ATGATAAGTGTTCGTCAAGATTATCCAATGGGCCTGTCAATGCTGCC
A01:14M15M:378551:	CAGCTCATTCGGCCTAATCAAGGTTGGCTTCATTCTTAGATTATGCT
A01:14M15M:378701:	GGCCGCAGGACAAAGCAAATGGGAACTGGTGGTTTGAGTTTGGTACA
A01:14M15M:394251:	GGCCGTCGAATTTGTTTCGCCAAAGCTCTGGAAACTACGTCGAGTGG
A01:14M15M:378851:	CTCAAATGGGATATGGAATTTTCCCATTTCAACAAGTACGTTACGAC
A01:14M15M:398401:	TGGATTATATGGAATCATTTTCGGACGATAATGGAGGATACAAAGTG
A01:14M15M:392751:	ATCTTTGGTCATATAATAACAAGTCATAACTGTGGCTTTATCGAAGC
A01:14M15M:393001:	ATTTCTTCAAGCAACCAGCATTTGATCACCCTTCTATGAAAAATCAC
A01:14M15M:393251:	CCTATACGAAGAATCACCAAAGACGATATCTTGGGATTAAACTCGTT
A01:14M15M:378101:	AATTCAGTAGTGCTCGGCTTCACATTCAGATGGGAGACGATTTCATA
A01:14M15M:378301:	ACAAGGATGACCAACCTCGGCTTTTCGTCTATACAAAAGTAAGACCG
A01:14M15M:420801:	CCGTGGCTGCAGGTACAACTGATCGAAGATTTGTTACTGATGTGGTT
A01:14M15M:422751:	AGTTTTCATCATCCTTGCCTTCTCTCTCACCACCTTCCAGCTTGGAC
A01:14M15M:423101:	TTTCTTTACTCTCTGATCTTTCAGCATCCTTTCTTCTTTTGTAGTAA
A01:14M15M:423401:	CTCCAGCTTCATGATAAGAAAAATTCACCTGCATATTCAACAAGCTT
A01:14M15M:423551:	TGTTTGCTCCCACACATAAACTGCCCTGACAGAGATGCAATGCATTT
A01:14M15M:423701:	ACCCATCTACAAGCATTCAGAATAAGCCAACTGAACAAAAAGTACTA
A01:14M15M:423801:	AGTCTTGTATCTTGACATGTCAGCTATACAGTATCTTAAATCAGTCA
A01:14M15M:424251:	GCCTTTGCTCCCAAGAAGGGTTTAAATCATCTTCTTCAGAACGTATA
A01:14M15M:424501:	CTTGACTTCTGTCGGCTTGTCCTTGCCATAGAAACGAACTGCAAAGT
A01:14M15M:424701:	ATTTGATTTTGGGACAATATGGATTCGGATAAATAGAAAAGCTCTCT
A01:14M15M:424851:	TGTCGTTCATAAGCGTTGAGGCCACGAATGTGCGCTTGGTATTGCCT
A01:14M15M:425001:	AAATTTCAGATCTGATAGTTGCCGAAGAAGCCATTATCCCCCGATGT
A01:14M15M:448801:	AATCAAATCTAAGAGGGAGGTCACGTGAATGCCTTCTCTGATGTGTT
A01:14M15M:448901:	CATCGAAACCTGTACACACCATTCTTATATTTCAACATCTCGCAAGT
A01:14M15M:449101:	ATTCTTTAAGAACATCCATCCTGCTGTGTGATAACGGGTCTAATGTC
A01:14M15M:449251:	AGATCAAGTGACTTACAGCTGTTTGAGGCGCATGTTGTACTGAACAA
A01:14M15M:449351:	TGATCAACCGGTATCAGGTTTCTCCTGCATCCAACTGATGAGCTACA
A01:14M15M:436151:	AAACTCCAAGAGCATTCTTGTAAGAGTTCAACTCCTTGCCGAACTTA
A01:14M15M:449651:	TCAGGAACCAACCTCTCGATGCAGTCGACCAGAAACTGAACCATCTC
A01:14M15M:436351:	CACTGATCTATAGTCCTCCAGTACACCATGTAATCCTCCTTGTTAAC
A01:14M15M:449901:	TCTTCTCAGAGCAAGCTATTTTCAAAACCCGCAGAAGAGGACCCACC
A01:14M15M:436551:	ATCGATGGTAGCAGTCATAGCCAATCCGCTTGCTTCATTCAAATGCA
A01:14M15M:450051:	TGGTGAAGTAACCATCGCCTGCAGATTGGCCTTGAGCTCAGCTATTC
A01:14M15M:436751:	CATCACTACGGTTGTAGATGAACCTTGTGATGGCTCGAGCACGTTCT
A01:14M15M:450251:	AGCCAAGCTTCCCGAACTCCTCAAGCATGTTATCTAAGCAATGTGCA
A01:14M15M:436901:	GCTTCTTCCCAGCAGCAGCGTAGTGATCTTCGGATTTTGTAATCACT
A01:14M15M:450401:	TGCCAACTTCTTCAACCACTTCCCTTAGCCGCTCAAACAGCTTATCA
A01:14M15M:437051:	AGACTGTCTTTTCAGGACAGTAAACCAAAAAGTTAAGCACTTTAAGG
A01:14M15M:450551:	TCAACTCCTCGACAAGAACGGAACAGCCTGTCCTCTTCCACATCGCT
A01:14M15M:437201:	TCTTCAGTATCCAACCTCGAAGGTCACCGTGCGTTGGTGCAGACACT
A01:14M15M:450701:	CAATGGCATCGATCATCGGCTGGAGATTAGCAGAGTTAACCGCATCG
A01:14M15M:437351:	TGTGAACGGCGTTCTCCCTATCTTTAGAAGCTGGGTGCACAATGTTC
A01:14M15M:450851:	CCACGGGGACCAAATTGTTGTCCATGTCTGTACCAATCAACCCATTG
A01:14M15M:451001:	AGGTGAAACCGTTGTTGGCATCAGACTGAACCACCATCATCATCGGC
A01:14M15M:437651:	CAGCTGAGGTGGAATGGCGTCTCTTCCTCTGACGTCTCACGGTTCCT
A01:14M15M:451151:	AGAAGAGCCTAACATCTTCGGGAACTTGGTCGCAGATCACGCCTTGT
A01:14M15M:437801:	CGCCGCCTTTGAACATTTTGCGACAGTAGAGGCACCTCATCTGGAGC
A01:14M15M:451301:	AGATTTCACAGTGCTTCCACGCATTGTCTTGCTTCTGAGGTGTGAGA
A01:14M15M:438201:	TTTTGGTTTGCAGGTTGTGGCCGGTTACGGAGAATCGGTTTCGGGAA
A01:14M15M:438301:	AATGAGGAGGAGAAGACGAAACCGGAGAGAATCGGAGGAGGAGATGC
A01:14M15M:451801:	AGGGTTCGAAGGGGAAAAATAGGTTGGGCAGCTTCGTTTACGATGGA
A01:14M15M:438651:	CGTAGAACAGTGTTGAAGATGAGGTTTTTGTTTACTTAGGTCTCCAA
A01:14M15M:452201:	AACACTTAGACGACGCTCTCGTTTTTGTCTCCAGGATCGTTATCGTT
A01:14M15M:452351:	CCTCTAGATACCATCAAACCATTATCCAGGTTTCTTTCTTCTTCTTC
A01:14M15M:452451:	CAATTGAAAATGCAGTTGGTTCAGGACCCAGTAAAAACTAAGCCCAT
A01:14M15M:452701:	CAGGGTTTTTATAAAGGTATTACGCAGATCCATGTCTCTTTTAATGC
A01:14M15M:439701:	TGGGTTTTACATTCAAAGTTGGTTCCTTACAAAGTTGCTAGTATGAA
A01:14M15M:439951:	CAACAAGTGACTGCTGCTTCACGGGCTCCAAACGCTGCAGCTGCTGC
A01:14M15M:440101:	AACCATAAACACCCAAACATGACAGCCGCTTTGCAAGAGTACCCATG
A01:14M15M:440551:	GTAATACTGCCAAAGGTTAAAAAAGAAGATCCATCCATAGCTTTTTC
A01:14M15M:440751:	AAACTTATTGTTCCGGGGAATTGGGATTAGGATGGCAAGAAGCTCTG
A01:14M15M:441001:	GTTATACTCTTTTGAGCTGTGAGCATGTAACATTAACATTCAAGTAA
A01:14M15M:441351:	AAAGCGTAAGCTAGACATTACCAATACTCAAATTATCACAAAATCCT
A01:14M15M:441451:	ACAGAAATATTTCCAACAGAAGTCTTTCACAATCCAAAACAGGATCC
A01:14M15M:454951:	GGTAAAAAAACCATCTTTTTCCCGGTCTTGAAACGTTCCTCGAGCTT
A01:14M15M:457101:	AATCAGTTGCTCAAAAACATTAGCAAGAGATTGATCTTCAACAAGAG
A01:14M15M:457501:	GCGGGTGGTAACTCCAGATCATTGATAACTCTTATGGAATTAAGTAT
A01:14M15M:457801:	TACGCCATATGAGGTCAAACTGAACCGACCGGATGAAATCCATTCAC
A01:14M15M:458551:	AATATAAAACACTCATCATTTCCTCTCTCTCTTCTTTAACCTCTTTC
A01:14M15M:458801:	CGATTAAGATTCGCTGGTTTTGTTTAGCGGTCTTTCATCTGATTTGT
A01:14M15M:458901:	CTTTACCACAACTTAGCTCGAGCTTCTTCATCTAGTGAGTTCCTTTT
A01:14M15M:459201:	ATATGAGTTCTTTGGTCAAAGTCTTGAAGAAGTTGAATTGGGAGGTC
A01:14M15M:459451:	ATCTTGCCACAACTTTTGCTAAGGTTAGCTTTTTGTTCTTTGCTGAC
A01:14M15M:459601:	TATGTTTTGTTTGTTTTGATGCTTGGCAGCTAAACAGAGTTGTTTCC
A01:14M15M:459701:	GGAAAGTGAGTTTATTACCTAACTCTGTTTACTTCTTCTTGTGCTTC
A01:14M15M:460101:	CTTTGCACAGAACATCCTCATATCCTCAGCAGCAAGCACAACTGCAG
A01:14M15M:460251:	CTCCTTCTCTCCCTGGTAGCAGCCAGCTGAACCTCCCTGCACCAAAC
A01:14M15M:460351:	CTTGGCCAGGTATGCCTCATGTGGTCCTACTCTTGGCAACACGGTGC
A01:14M15M:460451:	GGGTTGTTACACAGTCTAGTTCAACAGCAACAACAGCAGCAGCAGCT
A01:14M15M:460601:	AGCTCATGCCCTTCCCCATCGCGTCAAGAAGTAAGGGAACACAAACA
A01:14M15M:460751:	AAGTACATGACGTCAGAAGAGATTGAGAGTATCCTCAAGATGCAGCA
A01:14M15M:461001:	TTCCTCACGTTTGCAGACCACGCGCTTTACTAGAGGTTGAATCTCCT
A01:14M15M:461201:	CGTCAGCTTCTCCTAGAAGGCTTAGCGACTTCTCTCCAGCTCGTTGA
A01:14M15M:461351:	CTTGTCCCCGGCACTGAGATCGCTAGGGTTGTCTGCATGGCTGTGTT
A01:14M15M:461501:	AGTGGTTGTCTTGCGGCTGTTGTCTGTTCCTCAGAGCAGCCGCCTCT
A01:14M15M:461601:	TTCTCGAGAGAGCTGCTCAAGTAGTGAAAAACTCGAATGATGGACTG
A01:14M15M:461801:	CGTCATACGAGTGAAGACCAGCGGAACTTTTTGCTGAACTTTGGTCG
A01:14M15M:461901:	GCCAGGTTAGCTCTGAGTCTGTCATGGCTTAACTTTAACCATACATC
A01:14M15M:462251:	GCAAGAAGATGATGAATCTGGTGATGGTTTGATGTGTGCGGGAGCTA
A01:14M15M:462351:	GCATTGTGTAACAGTAAGGAACGCATTGTCTTTTTTTCTTTCTAAAA
A01:14M15M:462851:	ATGTCCTTTTCAAGTTTTGCAATTGCTCACATGCCACGTGCGCTTTA
A01:14M15M:464151:	GGTGGGACATGAGAGGTGTCTGCATGATTGATCTATTTTTCTTCTCG
A01:14M15M:466701:	ACTGCAATCTCACAATCCCAATTCCACCTCCTAAACACATCATTTTC
A01:14M15M:466801:	CTGCTTTTTTCTATACCTTTCTTCTAAATTTGGATAATGGCGGCTGC
A01:14M15M:468851:	CATAGATTCGAATGTTTCGAAGGATATCTGAACATGGGCACGGTCTG
A01:14M15M:469101:	CAAGCGACTCGGAAGCAGACGCAAGCGTGCGTAAAGTCTCCTCTAGT
A01:14M15M:473051:	TGACCGGTTATAAGCCGTTACCCAAACCGGATATTTTGTGTACGACG
A01:14M15M:473151:	TCCGGTATCAACCGGTAACCAACTGTATTTCCTATTTTCGTCTTCTT
A01:14M15M:473451:	CGTCAGCTTCCGTTTTTGCCGTCTCTTTCACGACCGTCCAATAACTC
A01:14M15M:473551:	TTTAGCTTTCACTAAGGAATTGCCGTTACCGTCAATGTCAAGATCTA
A01:14M15M:473651:	AGTGTCCCATAAGTGTTCTCCGTTATCTGCTCGTTCGAAGTGTATGA
A01:14M15M:474701:	TAATCATAGTTTCCGAGTGTTGCCACCATCCTAACCACTAAACTTAT
A01:14M15M:474901:	AAGAAGCACTGTAACCATTTTTCTCAAAGACGCACATCACATTACTC
A01:14M15M:475001:	GTTTTGCGGGCAGTCGATGAGTGGCTGCAAGTTAACCGCCGATCTCC
A01:14M15M:475101:	GGGTCCATGTACGGAACAAAAGTCTCTGACAAGTGTCCTCTGTACAT
A01:14M15M:475201:	TTATCCCCGCTCTAGCGGTAAATCCGACGTGGAATTTCCAGTTAGCC
A01:14M15M:475301:	GAACGGGAACGGTTTGTGTTTGGTCCGAAAGTCGTTGCCTTCTTTAT
A01:14M15M:475401:	ACGTCTATTGTTATGGTGATTCCTTCGATGGGTCTTGTGAAGACATT
A01:14M15M:475551:	TTTAGGGATCGATCAAGAATCGATTTCTTGAAGGAAGGGAATGTTAG
A01:14M15M:475651:	GGCCTGTGTAGATGCGTGAGGATGCGATTTTTCCGGAGGTTAGGTCG
A01:14M15M:475751:	GCGTGGTGGTTGTGGTGGTTTCTTGGAGGATAACCACTGGAGAACGT
A01:14M15M:475851:	GTGCCTAGATGAGATTTCTTGACGATGAAGCTTGTTTTGTTGATTTC
A01:14M15M:475951:	ATTGTAGGAGAATGATTAGGGTAAGTATTCGTATCTTCATTAATGGA
A01:14M15M:476551:	ATGCAGCCTCAGTGGACTGACAATATATTTAGGTACATAAATGTCAT
A01:14M15M:481801:	TCTCTGTATTTCTCACAGGGTACATTTGAGACAACATGTGGAGAGTA
A01:14M15M:481901:	AGGGTTTCCTTTTTGGTGTCGCTTCTTCTGCTTATCAGGCACTTATT
A01:14M15M:482151:	TAAATATTTGGGATGGGTTTACTCATCGATATCCAAGTAACTTGCTT
A01:14M15M:482351:	GGAGATATCGCTGCTGGCTCTTACTTGCATTATAAGGTTGGTTATTA
A01:14M15M:482551:	CTACAGATTCTCAGTCGCATGGTCCAGAATCATACCAAGTGCGTCGT
A01:14M15M:482651:	TATATTTTGATTAGGAGGAAAGGCTAGTCGCGGTGTAAATGAAGAAG
A01:14M15M:483051:	CAAAGATTTGGTGACAGAGTCAAGAACTGGATTACGATAAATCAACC
A01:14M15M:483251:	TCTGTACAGACAAAAGTATCAGGTTCTTAGATAAATGCACAAAAGAA
A01:14M15M:483401:	TTTCTTCCATACAATAACTCCGACGAAAATCTTAAAGCAGTTGAACG
A01:14M15M:483851:	CCACGGTTTACAACAATTGAAGCGTTACTAGTGAAAGGATCATATGA
A01:14M15M:483951:	CTAATCCTAATAAATTAAGTGTCATGACGGATTCACAAGTTGACCTT
A01:14M15M:484251:	AGTACTTCAAGACAAACTATGGCAATCCCAAAGTTTATATAACGGAA
A01:14M15M:484651:	GAGAGAATTGGATTTATATGCAGTCATCTTTGTTTTATTCGATCAGC
A01:14M15M:485101:	ATAATTATGAATTCTGTGATGGCTACACAGTCAGATTTGGATTGACG
A01:14M15M:504551:	CAAACTACATGAAAGACGATAACACTAGCCAAGAAACCAATAATTTG
A01:14M15M:504751:	AAAGGTGGAACCACTTGGCTCAAATCTTTAGTTTTTGCAATTGTACA
A01:14M15M:497001:	TGTTGAGCTACTGGAATGGAAGCTTAGAGGACAAGGAGAATGTTCTG
A01:14M15M:505501:	CTACGAGGTTCGGGTTTGATATTTCAGTAAGGTTGTGCTATGTTGTT
A01:14M15M:522051:	ACGTTGCACATAGAGTGCCTTCGCAGACCAATCTAGCTACAAGAGCG
A01:14M15M:522201:	AAAACTGTTCTCTCGCTAGTACGCTCGAGCTCTACGGATGGAGTCTT
A01:14M15M:522301:	GTTCAGCTCTTTGAGGAATTTTAGTCCACAATTTGTTAAGATACTTC
A01:14M15M:522501:	TTGGGTGTACCTGCTACAGCCGGTGAGGATGAAATTCATCCCTCTCC
A01:14M15M:522651:	TCTCAATCGAAAGGATCGAATCCATCGGAGCCGTCCATTTTGATCGG
A01:14M15M:522751:	TGATTGCAATTTGGGATATAGATCTGGCGTTCCTAGGGTTCTTCGCC
A01:14M15M:522851:	GGGAGGAGATCCGGTGGTGTTTTAATCAAAAAACGAAGCTCCTCTGG
A01:14M15M:523101:	ATGAGGAGGAGGAGGAGGTAGTGGAGTTATTGAGGAGATCCTATGAT
A01:14M15M:523451:	CCCGCTGTAAAGACTGAAATTATGCTTCCCCCTGCAAGGATACACTC
A01:14M15M:523551:	AAGATAGTGATTCTTCAGGGCGGCTGCAGAAGAGGATCACTCAACCT
A01:14M15M:523651:	TCCAAAAACCAGAGAAGGGAAGGTCAAGCGCGGTTCAGGCACGGAAA
A01:14M15M:523751:	ATTGACTATAGACCTAGAAGGAATAGAGACTACTTAGATGCAGTTTA
A01:14M15M:523851:	TTCTTAAGCAGGTCAATAGTGGGGAAGAAGTGGCCAAACCACGTGAA
A01:14M15M:524051:	GATGACGGACTTACACATGGCTCACTGGTAATAAATACAATCTGTGA
A01:14M15M:525601:	TCATCTTAATGTGACAATCAGAAGTTGGATACGAAGCGCACAGAAGC
A01:14M15M:525701:	CGTTCCGGTCACGAGTTTCGCCGGACAAGTCATACAAACGCCGAGAT
A01:14M15M:525801:	TCGTCCGGTTCAACCTCCAGTTCCGTCGTCTTTCCGTCCTGCTCCAC
A01:14M15M:525901:	TTCTTGTCGAGAGACTCACGTTCCGTAACGGGAAGGAGAAGGTGTTG
A01:14M15M:526001:	CGCCATGAGTAACAGAGACAAGGAGATTATGTTTGAGTGGGAGAGAT
A01:14M15M:526201:	CACCTGTGTTTTTTTAATTATATTATCTCCCAAAAGCATGTGACACA
[truncated: 17,828 more rows]

## Sheet: A03
>A03:5M6M:129101_(reversed)	ATTTGATCAGATCCACCAACAAGAAAGACTTATCTTACAAACTCGGT
>A03:5M6M:122151_(reversed)	AAGGTCGAGATGGGAAAGAACATGTGTGGTAAGTTCTTTTTCATAAA
>A03:5M6M:26251_(reversed)	TAATTACTCTGGCTTGACTTCGTAAAGGGTTAGAATTTAACGGCAGC
>A03:5M6M:27051_(reversed)	TCTCTATGCTAAAAGATAAGGAGATGACACATCATTTAACCTAGATT
>A03:5M6M:39701	AGCTTGGGGCCAATGGCTATAAAAATAATTTAAGGGGAAACTTAGAT
>A03:5M6M:39751	GATCAATCATTCCAGTTGGTTAAAGTTTAAGGATGATGAGTTATGTG
>A03:5M6M:30801_(reversed)	CTTGACTTCGTAAAGGGTTAGAATTTAACGGCAGCCAGCAATTGAGG
>A03:5M6M:25901_(reversed)	GCATGCCAACTCTATAAATACTTCTCTTTCCACACCAAAACCTCAAA
>A03:5M6M:30401_(reversed)	AACCACTAAGGAAAAGATGGAAGCGAAATCATTTCTTCTCCATTTTA
>A03:5M6M:30301_(reversed)	CTAAACAAACCCTCAAACTGCTCATCGTCTGCAAGTTTAGTGAGCCG
>A03:5M6M:45051	ATGGACACTCTTATAATGGTATCGATCATGACCCTAGTGCTCTTTGT
>A03:5M6M:31201_(reversed)	TATAAAAAACTCATGGACACTCTTATAATGGTATCGATCATGACCCT
>A03:5M6M:31151_(reversed)	GCTCTTTGTTAGCTCTGGATCCGCACGTGCCGCCACTCTTATCGTAT
>A03:5M6M:47951	AAGTTCAAGTCTCAAGTTTCCGAGGAGAAAAAGTTTTGCTGTCTCCA
>A03:5M6M:49001_(reversed)	GTATTTGAGCTTGTTTGGTAATTATTTCTCTTGGAACTTGAGGCCAG
>A03:5M6M:55151	CATCTCTCCCACGAGATTGAAGCCACCGACATGACATCTCTCGAGGC
>A03:5M6M:55101_(reversed)	GATGTCCATGTGATCAGGAATCGGAAGCTCTCTGAGTCCAATAGCGG
>A03:5M6M:54801	TCGACGCTCTTCAGATATCCGACCGGACCTGTACCGGAATCCTCTGC
>A03:5M6M:57751	ATGGATAATGGCTACAACATCAAGCACTTCCCTCGTTACCTCATCTT
>A03:5M6M:57901	TGGACTAATCAATAGAGAACATAGACAAACCACAAAGGTTTTACAAG
>A03:5M6M:58151	ATAGAAGAACCAATGAGAAAACCTTCAAGAACTTCCATTACTTTCTT
>A03:5M6M:58301	TCTGGTACTATACAGTGTGGAGAAGCATTTATTTAAGAACAAGGTAG
>A03:5M6M:59151	CTCTTCTTCATCTTGAAGCCTAAGCCAATCTATACCTCAATATGTCC
>A03:5M6M:58751	CCTTCATTACCATTACCTCCCTCCTTGTCTAAATCACTCTTCCTTCC
>A03:5M6M:59301	CTAGTCCCGACGACGACATCTGCTCCATCATGGCCATGCCCACCACA
>A03:5M6M:59751	AAAGGAAGAAATGGAGAAAGAGGTATGGAAGTCCATTTTAAAGCTAC
>A03:5M6M:60101	ATATGTTACGGGAGATGCTTGATCAAGAAGAGAAGACACGTGAGATC
>A03:5M6M:61201	AACAACACCAAATCTTCTACTAATCATCGTCAAGAGAATGCAACATT
>A03:5M6M:61301	CCCAAAGCTTCCACAAATCTAATGAGAAAGTTGGATTAGTCAAGAAG
>A03:5M6M:61401	GAAGAAGATGCTTAGGAGGATGAAATCGCCTTCTCCTCTACGTGAAC
>A03:5M6M:61751	GTCCGGTTTCGAGATCCAATCCTTTCTCTTTGATCTCAAGAAGCTTT
>A03:5M6M:62151	TTTGGATCAACATGTTCAATGCATGTGTTATGCATGTATATATTCTG
>A03:5M6M:62301	TATGGAGTTCCTAAAACAACTGAGAAACTACAATCTCTTGTTTATAA
>A03:5M6M:62701	TGCGGAACTCGATCCTCTCCTGCGGTAAGTTAAACTCATTAATCCAC
>A03:5M6M:63101	TGAGCTTCTTGTAAAACACGCCGTCGATTTCGTGGCAAGGGATGATG
>A03:5M6M:64551	ATGTTCAACGTTGTTCAGATTCTGCATGTCATGGATCTCATTCTTAT
>A03:5M6M:64851	ACGTTGATACAGACTTGCTCGGGAATGATTTCTATTCAAGCATAAAA
>A03:5M6M:65701	TAAAATAGCATCAATGTTATGATGTTTCTTTGGTGAGTGGGTGTATT
>A03:5M6M:66651	ATAGAGCGGTCATAGCTGAGTTCGTGGCAACACTTCTCTTCCTTTAC
>A03:5M6M:67451	AATAATAACATTAGATATGGAGGTGGAGCCAACCAGCTTGCCGACGG
>A03:5M6M:67951	CTTTAGGAGCTCTGCTTAATTTTAATTGTTTGAATTGAGCCACAAGT
>A03:5M6M:68201	CCTCTTCATGCATTCTTTGCCACCAACCTTCTACCAAAACAAAATCG
>A03:5M6M:68701	TCTTCTCCTGTTCCTTATCTCTACTTATACGTGTGGCCATTGCAGGA
>A03:5M6M:68851	CAAGAAACTCGCATTCTTTGCCATTTCTTTCACCTTCACCTTCACCT
>A03:5M6M:69051	TTTGTGATCAAGAAACGACTAGCTAATTTAACCCGCACGATTGTAAT
>A03:5M6M:78851	CTAAGCGTTGACTGTTAGGTGCCAACTCATTTCTCAAGTGTCACTCA
>A03:5M6M:79101	GGTAGGAATAGTATCCGGTAAGATATCAACTAAAAAAGTTTCACCAG
>A03:5M6M:79401	GTACGTGTTGAAGAAACGGCGAGAGAACATTCGTCGATCACGATATG
>A03:5M6M:80101	TTCTTATCCTCACCAAGTTTAGATGTAAGAAACGAAAGCCAATTCTA
>A03:5M6M:80351	AAAATGGCCTCATCAAGATTTCAACTTGTTGCCCTTCTTGTCATCTT
>A03:5M6M:80551	TCAAGTTTCTTGAATTTTTGCAGAAAAGGAAGAAATGGACGGACCAT
>A03:5M6M:80651	CGAAGCACCGACGCTGTAAAAATGGACGGCCACTGTCTCTTCGACAG
>A03:5M6M:80851	AATGTTTACGTCCTAATTACTTGAAGAATAGAAGAAGTGATCTTGTG
>A03:5M6M:84401	CAAACCACCATCATAGACACAAGCACAATGCTGCCAAAGACTTTGAA
>A03:5M6M:84551	TGGAACTCTTACTCCAATAGTATCAATCCCAGGGTTTAATGACCTTT
>A03:5M6M:85051	GAGCCTCGTTGAGAAGTTCATCTCAGTAATCTTTCAACTTCGACGCT
>A03:5M6M:86001	AGCTTTTTGACTTGAGATAAACTCAAAGAGTCATCTTTTTTCTTAAG
>A03:5M6M:86401	AGGACAAGAAGGAGAAAGACGAGAAGGAGAAGAAGGCCAAGAAGGAG
>A03:5M6M:86601	GGACAAGAGCAAGCCATGTGCCAGGCTAAGGGTGCATGTTATTACAA
>A03:5M6M:87051	CGCTGGAAGAACCAGAGACTTCACATGGGTACAAGCCCTAAATGTCA
>A03:5M6M:87851	AGTTGCCTCAAGATGACGCTTTTGCCCATCTTGAGACTCAGTTCAAG
>A03:5M6M:88001	GAGAAGACAAATACCAAACGCCTTCTCTGTTCTCGCCGACTTGTAGA
>A03:5M6M:89501	AAGTTGCTCCTTCCATTATCATATACCACACCCTCCATTATTCATCC
>A03:5M6M:90051	ACCACCATGGAGAATTCTCCCTTCTTCCTCCTCCTCTCCACCGTCCT
>A03:5M6M:90151	CTCCACCAGGACCCACAAACGTCACAAAAATCCTTGAAAAGGCAGGC
>A03:5M6M:90301	GCGACTCCTCCTTCTCCAGCCTCAAAGCCGGAACCCTAAACTCCTTA
>A03:5M6M:90451	GTGACTCCGCCGAAGGACATTTCCCTCTCAACATCACGACCAGTGGC
>A03:5M6M:90551	CTACAGTGATGGACAGCTAGCTGTTTATCAGGTCGATAAGGTTTTGC
>A03:5M6M:90701	TTCTCCGGCGGACGCTTCGTTGGCTTTGCGTGAAGTTGGTTCTGTTC
>A03:5M6M:91601	TTCCTCATAATGGAGAGTCTCTTGTCTCTCAGCAAACAATTGGGGAG
>A03:5M6M:91701	GATTCTGAATGCGGGGAGGGGAGCAGTGATTCCATGGTGGCCTGGAA
>A03:5M6M:92101	TATTGGTGACGCCAACTCCACCAATGAATCATTTGTTTAAATATCAC
>A03:5M6M:93101	AGCCGTTGATCTTCCAACCAGCTCTCTCTGCGAAAGCTCTCATCATC
>A03:5M6M:93201	GATTTTACCCATGTCTTGATCCGAGGGTCCAGAGAAACCGGAGCCGC
>A03:5M6M:93351	GTGGAAGTTGCGGTGGCAGCCACATGCATCGCAACTAAGGGACGGAG
>A03:5M6M:97101	ACCGCCAGGCCCGGTCTGGCCGCTCCCCGTGGATCCGCCGCCGCTAC
>A03:5M6M:97301	TCTCTGCTTCATCGGCTTTGTCACCGCTCTTCACGTCTTCGGAAAAC
>A03:5M6M:97451	TTTCTTGAATCTTGATGATCCGTGTAAAACCGCTTAACTTTGAATAA
>A03:5M6M:97801	TTTGTGCGAGATTAATAGTCAACTCTGAGTGAGATTCATGCATATGA
>A03:5M6M:99051	TCCATGAAAAAACTTCACAAAGACCAAAACATCTTCGAGCAAAGAGA
>A03:5M6M:99651	TATGTGGCTACAATCAAATGACAAATTATCACAAGTGAGGTCATCGT
>A03:5M6M:100451	AGAATCCAAACTCGAGTTGTCATGTGGAGAAAAGAGGTAAAGTGAAG
>A03:5M6M:100851	TCTCCAAAGAGTAAACATGTTTCTTATGTTTATCTGTCTTCTCTCTC
>A03:5M6M:101651	TAAGGAAAAGGCTCAAACGCCATCAAAGTTTTTGTAATGCAAAGAAA
>A03:5M6M:103351	ATGTACAGTGACTTCACCTTGTTACAGCAGCAAATCATCTGCTTGAC
>A03:5M6M:104201	AACGAAAGCATAAACGATAATACAGAAACAGAATCAAGAATCATACG
>A03:5M6M:110951	CAACTCCATAGCCAACCACCAACATGAAATGGTTCAAGTCCTGACCG
>A03:5M6M:111101	TCACTAGTGTAGACTCCTTCCTCGTAAAAAGCGAATGAGTTTGTAAC
>A03:5M6M:111701	ATTCTAATCACTAGTTTACCTGATTGCCCACCCAGCTTCACATTGTC
>A03:5M6M:112801	GTCGGAGATCGGAGTGGACTCATGGGATCCGATGAGAAGCACCAGAA
>A03:5M6M:123651	GAACTTGCACGACGGCTGGGACGATCAGTTCGAGTCCCACGTCATCA
>A03:5M6M:123801	TGGTTGATGAGCTTGAAGATGTAATGGAAGGAGGAGGGAACATTGTG
>A03:5M6M:140901	TGATCAAGAATCTGCCCGTAAAGCTGGATTCGAGAGTTGTCTTGTCC
>A03:5M6M:143501	GCAATCCATCTGGAGAGAGGATTTTTGCAGATCCATCTAGATGAAGA
>A03:5M6M:141101	ATCACCAGTTTACATAGGAGATGATATTCTCGGAATTGTACAAGCTA
>A03:5M6M:125801	AGGTATTAAACTTTTCACCTTCCATCTCCGTATGTGATTGTGTGACT
>A03:5M6M:141701	GAGGCGAAGGAAGAGAGTCTGATGGTGCTAAAGAGCTTCTTGAAGTG
>A03:5M6M:141951	ATCTACAGCATCCAGCAGAGAATCACTTCTCCAGCAATCACAAACCC
>A03:5M6M:142051	CCACAGGATACTTCAAGCATGAAAGCACCAAATGCATAAACATCTGT
>A03:5M6M:126201	TATCTCCGTAATCTTCAAACCTAGCCATTCCAAAATCTCCTAACCGT
>A03:5M6M:126301	CTGGTTAGCTCCTGTGTGCAGGTAGCTAAGAGCAGAGGCGATATCCT
>A03:5M6M:142401	ATTAGACATGTACTCAGAGACAAGAAGAAGCTCTCCTTTCCTTCTGC
>A03:5M6M:142501	ACTTCAGCTACAAACTGTTTCATCCCTTGCTTCGCGTCATGGCACAC
>A03:5M6M:142801	GATGTTTGCTTCTGTTTGGCTCTTGGATGAGGAATCTGAGGAAGTTT
>A03:5M6M:142901	AGATGTATTGGTAACTAACCAATGACCCTGTTGCTGCAGAGAATCCA
>A03:5M6M:143001	GAGAGGATGGTTTGGCTTCTGGATTCTTAGAGGAGCCACTGTGACAT
>A03:5M6M:143101	ATTTGAAGGCTTTGATTCTTCCCTTTGGTGTTTGAATAGTAAGAAGC
>A03:5M6M:143251	AGAAGCTGATAAGATGGAGATCCGTTTGTTGAGATGTTGGAGAGTCC
>A03:5M6M:143351	AGGCGATTCCATGGCCGCCTTCAGCTCCTGGTTTAGGCACAAGTGCG
>A03:5M6M:143601	ACCTAACAAGCAAATCAGGTGATTAAAGAAGATCAGCAAGATCAGAT
>A03:5M6M:143751	TATCTTTAGGAAATGCATTTCATATGGGCATTTTCTGAGTTGAAATT
>A03:5M6M:143851	GTTGTTCATATAATAATTGTATGGTCTTCTCTCTGGTTCTAACAATG
>A03:5M6M:145151	ATCAGAGATTACCTCTGACTGCTGATGCTGGAAAGATTGGACTCGAG
>A03:5M6M:145351	GTTGGCCGAAGAAGAAGCTGACCAACTCCATGAAGCGGATGAGACTA
>A03:5M6M:145801	AGTTCCCACTGCAGCCGTTGTGGCTGCACTCCCTCCGTGTTCATGAA
>A03:5M6M:145951	GTGCAAGTACCAGAGAGCAGACGCTATTCCCTTAACAACCACAAGTC
>A03:5M6M:146751	CCCAGACCTGTATAGGGTTTCCAGACAAGAGGTTTAAGCTTACGTTT
>A03:5M6M:147051	GCACCAGAGCACAGACGAAATGAGTTGAGAAGGAAGTGAACTGGATT
>A03:5M6M:148701	AAACTCCGGCAAAGCCATGTTTCCATTCACATATTGCACAACCTGTT
>A03:5M6M:149051	CAGCCGTTGTGGTCGGATCAGCCCCTCTGTCGTATAGCCTCGACATA
>A03:5M6M:149451	AGCCACTTCTCTGCTCTTAGAGAGTGTTCCTCTATAGACTTCGCCGA
>A03:5M6M:149801	GTACGTACTGGTAGCTCATGATCGACCCGGTTGCACCGGAGAACCCG
>A03:5M6M:149951	TGAGCATGGTTCCTTGGTAGTCAACCCAAACCTGAATAGGATCTCCA
>A03:5M6M:150451	TTGTTACCTGCCTGGTCGAAGCCGTTGTAGACAAACGGTGGCTCTTG
>A03:5M6M:151701	TAGTCAGGATGGAAAGGGTTGGAGTAATCGTCGTATTCATAGCCGTC
>A03:5M6M:152351	AGTTCAATCACGTGTAGGCACTTGTCACACTGCCCCCACGTTTTGTT
>A03:5M6M:153051	TCAGCATGGAAATCTTTTTTTGCTTAGGCACCCAGTTCCCCTTGACC
>A03:5M6M:153801	AAACAACAAACCACCCCTCTGGTCGCAAATCGCAACCCCAAATCCAG
>A03:5M6M:153901	TCACTCACCAAACCCTTAAAGTAAAGTCTGTACAACACATCTCCGCT
>A03:5M6M:155151	TGATTTAGTCTCCCGATTCTTCATGATCTGACTCACATCTGTCCTTG
>A03:5M6M:155401	AGCTCTTGCAGAACCTATTTCAAAATCAGTCTCAGAGCTCCAACTCT
>A03:5M6M:155551	CCTATCCGCTGAGAAAGTCAAGAAATGGATTCAGCTATCCTTCGAAG
>A03:5M6M:155701	ACCAAACTTCCCGGTGTTCTTCAAAGCTTATTCACATTTACGATCCA
>A03:5M6M:155801	CGTCATCATCCTTCTCTTGTCCACTCTGAATACTCCGTTTTGGTTCA
>A03:5M6M:155901	GGTTAAGCGGAAGTGTTGCTAAAACGTTGTTAACTCTCCATGTCAGT
>A03:5M6M:156001	AGTTGAAGAGCAAACGATAAGTAGATGGAGCCCAGAACTCAGTCGTG
>A03:5M6M:156251	TTCTATAGTCACAAATCTCATACGCTTTTGATTTTAGGTATCTCGTA
>A03:5M6M:156801	GACTAGGATGAGATTTGGTCATCCTAGCCTCACCGGCCGGTTCGTCA
>A03:5M6M:157001	CATAGTAGTCTCTGGTCATTGTTCCACAACATACAGTCCGGGTTTGG
>A03:5M6M:157751	TTCTAAATATTTTGTTACCTCAATAGGACTAAGCCTTCTGAAGTTAA
>A03:5M6M:157901	CGTGACCCTATCCTTTAACCAACCCGAATAATCACCGAGATAATAAT
>A03:5M6M:159001	GGCCTGAGCCTTTATCAGTGACGGCGTAAGCAAAGATGATGAAACCG
>A03:5M6M:158051	GAAGAGGTAAAGCCACATGAGGAACTTGTTACCGTAACAAGCTCCGG
>A03:5M6M:159151	TGGAGATTCCTATGATGATGAGTGGCCACTGGAGGAATCTCATGCAG
>A03:5M6M:159251	GGAGAGGAGGAAGGTGATGAAGTTCACGAGACCTATAAGATTGTTAC
>A03:5M6M:159501	GTTATATATACACGTGAATACGTGATTAGTGTAAACTGTGTTCACAA
>A03:5M6M:159701	GCTGGGCCCTCTGTGTCCTAAAATGCACTTAACGATAAAAATGGAAG
>A03:5M6M:159751	TTTTAGCTAACGTTCAAAGCTTTGAAAAAGTTTTCCTCGACCGACCA
>A03:5M6M:159901	TTACTGGTAAGTGAGTGGGCTTGCCGAAAATATGAATGTGCTTAACT
>A03:5M6M:160301	CAAAGGAGTACGCTTTGTCTTGCTGCGTTTTGGAATAACCTTTTTGT
>A03:5M6M:160701	GCTATTACTGTGATGCACTGTGATTGTTTGCTAATGCTTCACTTTAA
>A03:5M6M:160851	TTGCTTGTCTTGTCTTTGAGTGGAGTATTTTAAATCTGTTTACTTTA
>A03:5M6M:161201	AGTCAAACAACTTGTGTAGTTAACATCAATGGTTTCAATGTCAAGAT
>A03:5M6M:161651	AGTAACTCCCATCATGTTTTCTCTGCCATTGGACTGTTAAACATGTC
>A03:5M6M:161751	GGCTCTACATTGAAGAAGCTGGACATATCTTTCCGGTAAACTAAAAA
>A03:5M6M:162251	TCTCAGCTAATAACAGAACACCAAAGAACAAAAGTCCAAAATTTCTG
>A03:5M6M:163251	GGGGAGTGTGGAGGCTTCTTCTCGGTTAAGGATACAAGCTGAGCTTC
>A03:5M6M:164051	GGTATTGATGTGAATTAGTAGTTTGAGGACTATGTTCTGGATAAAAA
>A03:5M6M:164651	AAATGAGAAAGTGGAAGTTTCATGAGTTTTGTGATTCAGATGTTAGA
>A03:5M6M:166301	GCTATCCCCCATCTTTTCTCCCAATAACTACAAGGAACTCAAACCCT
>A03:5M6M:166701	AAAGGCTAAGCTGAGATCAATGTGGTCATTGTTACTATACCCACCGA
>A03:5M6M:166851	GGGAATGTTCCTTAGGGTTCCGCCTTTGGTCCAATATCTCCGACATG
>A03:5M6M:167001	CTGTGGCCTCGCCGCCCCAGTTGCCGGAGAAGGTTTCTTCTGATCAT
>A03:5M6M:167251	AATGATCCATAAGAGCTGAATGTGAGAAGCTCCTGGAAGATTATTAG
>A03:5M6M:167401	ATGTATATATAGATGGGAATGTGGGAGGAGAGAGGCACATAATTGTT
>A03:5M6M:167601	AATGTACATAAATTGCATCTTACTGTCAATTGAAGTGTTTTGGACCT
>A03:5M6M:168051	GGGATTGGTCAATATGATGATGAGTTTCAATCGTTATCAACAATATG
>A03:5M6M:168151	GATGGCGTTCTACGTCTGGTTCCCAATCCCACACAGTCTCATGTTCT
>A03:5M6M:168301	CGATGTGATCACCTTCGTGTCGTACTAGAGGAGTGGCCAAACATCTC
>A03:5M6M:169501	CGTCCAGGAAATATGGTGATTCATTTCAAACAATCATTGGTCTCCAA
>A03:5M6M:170201	AGACATAGAGTTTTGTGGTTGACCAGTCAATGTTGTTATATTTTCAT
>A03:5M6M:171251	GGACATATATTCCTTAACAACAGCAGGAACAGAGTGACTGGCCGGCA
>A03:5M6M:171401	TTGCAGCCATATTGGTTTTGCATGTGGTGTCTCACTCACAGTCAGGG
>A03:5M6M:172451	TTAGCTGTTGTTCCCTTTTTATTTAATTTAATAGTAGCTCTTTGGAG
>A03:5M6M:173351	TCAAACGGTTAGCCAGATCCGGTACAGTCTCCTTCACATCAGTAAAC
>A03:5M6M:173451	CTGAGCGATTGCAAGAAGGTAAACACCACAGTCGTACCCATTCCTCT
>A03:5M6M:173751	GTCTTTGAGTGATTCGGTGTCGGGGCAGTTTGAGATCCAGAAGGCAA
>A03:5M6M:193601	TGGAGGTCGTCAGTAACAAGTACGGGTCGAGACGCGTGCAGAAGCTC
>A03:5M6M:193851	CAACGAGGTTTTAACCGACGCGGATGATCCTCTCTACAGAAACCGGT
>A03:5M6M:194751	AGCGTAGGTCTCACGGAAGCAACATTGCAAACATATTGGATACAAGA
>A03:5M6M:194951	ATACAATTTTCAGAACTATTCATGATAAATTTGTAGGAAAGACGGGC
>A03:5M6M:195151	AGAAGACACAACTTCTACCTCTGTTACCAGTGGACTTACATTTACAT
>A03:5M6M:195701	AGAAAAGAGATAAGCTACTTCCCTGTGCCTGTTGATCCATTAGCCTC
>A03:5M6M:195901	CCTGAGCTCATATCCAAGTCTGCATTTATCATCCCTCTTCCAACAGC
>A03:5M6M:196201	GAGGAGGTAACCTGCTGGGCGCAGAAAATCCTGGAGGAGCAGAAACT
>A03:5M6M:196451	TATCCCGATAAATATCTCGGCTCACTACAGACTCTGGAATAGGCTGT
>A03:5M6M:196651	AACTCAGCCCAATTTTGGGGTGAAGTTAAGGTTTCATCCCATGGATC
>A03:5M6M:197151	ACATTGCTCTAGATGTGGCAACTTTGATATTTCATGATCAGGTTGTC
>A03:5M6M:188001	CTCTGGAATTTGCAGTCATCTCCATTTGTGAAACACCAACAGACAAG
>A03:5M6M:188151	CTAAAGGCTTGTCAATGTCTCTGCCATCGTAGGAAGAGTCGGTTGAA
>A03:5M6M:188251	CCCAGAACCAACCACAACATTATGCTGCAAAGGCTTCAAAACCCTAA
>A03:5M6M:188351	AGAATGTTACTAGAGGATACAGGCCCATGAGCTGCGTTTGCAACAAC
>A03:5M6M:197751	AAAATACGTCGCCTAAGAAGCAGCTAGTGAAAACTCACCATGACGCT
>A03:5M6M:197851	ATACCTGGCAACACTTGCTGCATTCTGCTTATAGAAAAAAAAAAGAG
>A03:5M6M:198151	TCTCACTGCAGAAAGCATCTAGTGGTGGAGGTAGCATGCTCCCTGAA
>A03:5M6M:198401	GGGCAGATATGGCCTCATCTTTTGTGAAACTATCCTCTCGTGAACCG
>A03:5M6M:198601	AAGGCGTACCGCATTTCTCAACCATGCATGACAATACTTGGTTGTCC
>A03:5M6M:189551	GAAGCGAGTCAAAACTTACTTCAGTGATTTACCATCCAAGATAAACC
>A03:5M6M:198801	GATGCAACGGACAGCCTCTTCCTCTTTTGCATAAGTAATATATCTGA
>A03:5M6M:198951	GCATGTATCGTTTGGGAATTGTTGGATGGCACCAGATGATGTTCGGG
>A03:5M6M:199201	TGACACTAGTGAGTTGCTTTCTCCCATCAGAAGGTTTTGATTTTGAC
>A03:5M6M:190201	AGTCAACAGTCATCCCTACAATCTTTTCTTTGTCATATGGAGTGCGA
>A03:5M6M:199451	ACGCCCTTCTATCTGATCTTTCTCTGCCATGTCCACTATGTGATGCC
>A03:5M6M:199701	CCGCATTTGCAAGGCTTCAATTGCTGATCAGTGAGATCCATCTCTTC
>A03:5M6M:191151	CGATCGGAGATTTTGCAGAGGGAAGAAGATTGGTGAGATGAGGAGGA
>A03:5M6M:201901	GGTGGCTGCGAAGCCAACCGTTGTTAAGAAGACAATGTCGAAGCAAT
>A03:5M6M:202001	TTCTCTGCGGTGAAGAAGATTCTGAGTGATCATATTGAATCGGAGGA
>A03:5M6M:202151	TATTATGATTTAGATGATGCAGAGACCAAAGCTAGAAATGGGTTTGA
>A03:5M6M:202551	TTTGAGAGTACTAATGGAGGAACATCCGGAGCTAGCAATGACGGTGG
>A03:5M6M:202801	ACCGATAAAAAAGGTCAGACGGCACTTCACATGGCGGTGAAAGGACA
>A03:5M6M:202901	TGGTTGATTCTAAAGGGAACACTGCGTTACATGTTGCTACTAGGAAA
>A03:5M6M:203051	AGTGGAATTGCTTCTAGAGAACAACGAGACAAGCACAAAAGCGATAA
>A03:5M6M:203201	CAACACTACTCGCCCAAACCCGGCGCGTGAGCTCAAACAAACTGTGA
>A03:5M6M:203301	AAACGCGTTCAAGGAATCGCCAAACGCATAAACAAAATGCACGTCGA
>A03:5M6M:203501	TAACCCCGCGTTTGCGATTTTCTTTATATTTGATTCCATCGCTCTTT
>A03:5M6M:203651	TTGCGTTTTGATATCAGTAGCGTTTTTGGCATTGGCGTTTGTGGTCG
>A03:5M6M:203751	ATAATGCTCACGACACTTGGGACTATGTGTTATTGGGTCATTAGGCA
>A03:5M6M:203851	CGAGACAATCAGGATTGATGGATTTTTCTGGGATTTTGACAAAGAGA
>A03:5M6M:204851	TAGCAAACATCTAATTCCAAAAATCAGATTTGAACAGTGGTGTAATA
>A03:5M6M:205001	ATAAAATTCACCTGAAATGAGTTAGTTTACAACGACTTGACGAGTAT
>A03:5M6M:205151	CTTATAACTCTTTTTGAACAAAGGCTGTACAGTTCATCTAGATTTGT
>A03:5M6M:207101	GAATCATAACGACATTATCTTGCCATTATAAAGTCACATCCTCATTC
>A03:5M6M:207401	CAAAAATCCTTTGTCTAAATTTCCACCTCTCCTCCCTTTTTGGTCAT
>A03:5M6M:207601	AGAACTTCCCGGAAAAAGTCGATCTGCGGGAATCTCATGTGAGGTTG
>A03:5M6M:207851	GACTTACGAGGACATAATAACGTACGGAGAGAACTGCATCGTCGTGG
>A03:5M6M:207951	GCTGAAGGTTTAGCGGGAGGAGGCGGGCACAAGAAGCATCTTGTGGA
>A03:5M6M:208051	GCAAGTCGGAGTTTTCGAAGTCTGCGGTGGAGTTTAGAGTGTATAAG
>A03:5M6M:208251	GGAAGAAGCAGAGGGGTTTACAGTGATGGTGATGGCGTTTTCAATAT
>A03:5M6M:208951	ACGTTAGCGCCTACCTCCGACGCGCATCTGCTGCCTTCACTGAATTG
>A03:5M6M:209251	GCAAATATGAAAATGTTATTGACGAGAAGGTGAATGTGAAGTTGGAA
>A03:5M6M:210701	ATAGAAAAAATGCGTGAAGCTTGGAAGAAAGAAGAGACAAGAAACAA
>A03:5M6M:211451	CCAATCCTACTGTGAAGAAAAACTTCCGATCAACCTTCAGAGGCACG
>A03:5M6M:211951	GAGCAGTTGTATAGCGGACCAGGAAGACCGTTGATCGTGTAAGCATC
>A03:5M6M:212201	TTTTGGAAGGATGATAAGAGGACCATAGACTGTTGCTCTGAGCCATG
>A03:5M6M:212701	CGTACGTCCAGCGTATAATGCCTTGTTTTCCCAAATGCAGGTTCAGG
>A03:5M6M:212801	ACCTTAAGGCGTTGATTATAGCTGGTAAGGCTACTGAACACTCTGCC
>A03:5M6M:213051	TTAGAACATATATGAACAGCTTATGAATGAGTGGTGTCAAAGATAAG
>A03:5M6M:213551	GAGTTAGTCAAAACATTCGTAAGCTAAAATTGCTTGGGGATTAAGCA
>A03:5M6M:215401	AATGGGATATTGATCGGCTTGTCGTATTGCATAACAAATTTTGAAAA
>A03:5M6M:216201	CTATGTGAATGTCTCTGAGAGAGGGAAGGATATACTTGATTTGATGG
>A03:5M6M:216451	TACTAATGTGTTTTGGTAAACTCTTTCAACTTTGGTAAAGCAATGAT
>A03:5M6M:218501	GCATCTAGAGTGACACTGGCTGCATAATGGCCTAGTGCTGTTATTAT
>A03:5M6M:218601	AGGCGCGAGAAATCTCCAAGTACACACCGTGTATGAAATGTGACTCC
>A03:5M6M:224501	CGGCTTCTTGTTGTACCTCGCGAGCTTGGAAGACTCGCCGGCAAGCT
>A03:5M6M:220201	ACTTCTTATGGAAGAACCAAGCGGAACAATTAGGATCATTGCAATAG
>A03:5M6M:227301	ATGGTAACAAAGACACAGAAGAGAGACCAGATGGAAATAGAGTGAAG
>A03:5M6M:228851	GCAGTTCTCAGTAGTGACAAAGTCGAAATCATAAATGGCGTAACGGC
>A03:5M6M:229051	AGTCATCATGGACTGCCATCCCCGAAGCCGCATTAGCCTAAAATATT
>A03:5M6M:230001	AGTCGGTGCGTGCACTGAGTGCAGTGGTCACATGGCCTTAAGACGTC
>A03:5M6M:231051	AAAGACACTGAAGAGAAAGACCGATCAAATGAAGCTGTTTTGGTTGG
>A03:5M6M:233851	GGGACGGTACGCTCAGAGACTCGGTGGTGGAGCTCCGGTCTACATGG
>A03:5M6M:234151	CAACTCTGTTCTCTTGCCTAAGAAGTCTGCTAAATCGACTGAGGAAG
>A03:5M6M:235001	TATGCGATCACAAGAGCGGGAAATCAAAAGGTTATGGATTTGTGGTG
>A03:5M6M:249651	TTTTTTTTTTGAAAGCAAAAATCGCATGATCTGGTGTTGCGGTTACC
>A03:5M6M:250301	CATCCCCAAACTCAGATCCAAACACGCCACCCTCTTCCCACTGCTCG
>A03:5M6M:253851	CTCTCATTGTTGTTAGGTTTCTTGTGACTCGCACGGTGACCTCCCAA
>A03:5M6M:250601	CTCTTTCAAACACGTTTTACATGTGAAAACGCGTTTTTGATCCCCAC
>A03:5M6M:254201	GGAAGATGACGGATATACCCTTGTGACTTGGTGGATAAGGAAGTGGC
>A03:5M6M:250951	TATCGTAATTACGTGGAAAATGAAGGGGTAGAGAACGAAGATGCGAG
>A03:5M6M:279451_(reversed)	AGAGTAAATTAACGAGGCGATATGTACGGAGACTTGGTGTAAACGTG
>A03:5M6M:251651	GGAGAGTGACGTGGATCTTCTTCTAGTACATGTTTCACGCGGTCTAA
>A03:5M6M:251751	TCTCGAAGCTTCTCCATTTATTGAATAATCAGTTAGATGATTCGGGT
>A03:5M6M:281001	ATGAAAACGAGATCATCATCCTCCGGTGACCTGGTTCCGGCGGGTAA
>A03:5M6M:281501	TCCAAGGGTTTCCATTTGCCTAAAGGATGGACCGTTGAGGAGTTTCC
>A03:5M6M:281701	ATCTCTGAAACTGTTAGTAAGAATTGTTCTTTGCAGTTTTATGTTGA
>A03:5M6M:277501_(reversed)	TTACAGCATCACCCTGTCCCTTCCAAAGATTTCAATCTACCTGATGG
>A03:5M6M:277301_(reversed)	AGGGAAGAAGTTCCGTTCTCTGCCTGCTGTTGAGACATACTTGAACG
>A03:5M6M:282101	CGGTTGATTCCGGGCAGCTTTCGGTAAGCTTTAACATCATTTAGAGG
>A03:5M6M:277051_(reversed)	GTGGAAACATGTTTAGTGCGCATGTTAGCGGATCGGATGTCTCTAGC
>A03:5M6M:282351	GACATGGTCTGAGGCTTTTGTCTCATTGCTCCAAGAACGGGTTTAAC
>A03:5M6M:282601	AGTGTGCAATAGTGAACCAACATTTGTCGGTTGACATTAAAAACCCT
>A03:5M6M:282751	TAGATATATCGTATTAGAATAAGGCTGATGGAAGCCTGATCTCTCTA
>A03:5M6M:275801_(reversed)	AAGATTCTAAAGACTTCCAGCTATGTCGACTGTGGTATCAAAAACTG
>A03:5M6M:286901	TTTTAAATTAGAGGGTGGATGAATAAGGGAGTGATTACGTGAGTTTA
>A03:5M6M:286051	AGCGTCTCATAATTAGCGGTGGCAAGGTTTCAGGATGTCGCTAGAGA
>A03:5M6M:287851	TCTTATCTTAAACTGGTAAGTGCGTATGCCGTCGCAAGTCACGAGCC
>A03:5M6M:287951	GTGGCATCCACGTAACGCAAGTCTTATATCTGTCTGCTTACTTCACT
>A03:5M6M:288601	GTGTAGAATTTTATAATCGCTACTGGACAATGGACAACTCAAGAATA
>A03:5M6M:288851	GGATAACCAAATCTTGTTACTCAATGTTAGGGCTAATTAATGGTACC
>A03:5M6M:289051	CCGAATAGCCATGTAATCAGTATTGAATTTTCACGGCCGTAAAAATA
>A03:5M6M:289151	TATATACCTAAACCGGAACCTTTTCAGTGCTTGGGTATATTTTTGCT
>A03:5M6M:289551	GTAATAGATTGAAACTTTTTCAGACATGAAGACAGATCACCAAGAGG
>A03:5M6M:290151	AGAAAGTGTTCTTATTGCAACACACAAGAAGACAAACAAAAAAGGAA
>A03:5M6M:270301_(reversed)	AGATTGCCAAAGGTTCCCATAAAACAAAACTGAGAAGTAACTTTCTA
>A03:5M6M:290801	ACAGGAAAGAGCTGCAGGTTAAGGTGGGTTAACTACTTACACCCTGG
>A03:5M6M:291001	CGTAGGTGGTCGAAAATCGCCAGGAAATTGCCTGGTAGAACCGATAA
>A03:5M6M:291101	AGAAGAGACCTATGTCTCCAACATCCTCATCTTCAAACTGTTGCTCA
>A03:5M6M:291201	GAATCAAGAATGCGAAGAAGACGGATACTACTCGATGGATGACATAT
>A03:5M6M:269501_(reversed)	AATCTGGAGCAAACATTATCAAACCGGTGAAAGACATCTACTACTCT
>A03:5M6M:291351	AGCATGGGAAAGCTCCATGGAGTCTATCTGGAACATGGATGCAGATG
>A03:5M6M:291451	GGTAGATCATCATCGTGGTCGTCTTTACTCTAGGATTTGATTCATTT
>A03:5M6M:291701	TGGATACCATGTATAATACACGTTAAAACATATCCATCAATGTAGAC
>A03:5M6M:291901	GGCTAAATAATCAAGAAAATAGGTTTGACTTGTAAAGCTCAAGCCAG
>A03:5M6M:292201	GATGGCTGCTTAAAAGTATGCAAGCAACCAATTTATCAATTTTAAAA
>A03:5M6M:268351_(reversed)	ATTTAGAGCATAGGGGTATATCTTTCATAATTTGATTTTACCTGCTT
>A03:5M6M:267901_(reversed)	CTGTGACTAAACTAGGGGGATGACTGTCAACAACTGAACTATTGAGA
>A03:5M6M:293601	TTAACCGCTGCTTCTCGTCTCCTTCGCGTTGTTTACTTGTACCAAGA
>A03:5M6M:267051_(reversed)	AACCGAGTGGTTTTCTTCTCTCCTCTGATGCAACAGATTGGAAGAAT
>A03:5M6M:293801	TGAAAAGGAAGTTTCAGCAAAGCTGGCAGTGTGATTCTACGTTCACG
>A03:5M6M:293901	GGTGTATTGGCGAGGTGAGTTTGATTGATCTTCAGATATTTATTAAT
>A03:5M6M:294001	GTTAGCTCGTGATTAGAGTAGATTGTGAGAGATAGTTTCTTTAGCAG
>A03:5M6M:294101	GCTGATGATCAGATATTCAGATATCCTCGAGATGATTTAACTTGCCC
>A03:5M6M:294751	TGATTTGTGAACTGAGAAGGAGATCTTTATTTATAGTGCAACTTCTG
>A03:5M6M:294951	CACTTGCAAACCTTAACTGATGTTCTCATATATGGTAGTGGAGCCAT
>A03:5M6M:295301	TCGTTATTTAAAACATGCGTATTATCGAGTGCTGACGTGGCGGATCC
>A03:5M6M:264851_(reversed)	TCTGCAATCGCCTCACTACTTCAGCTGTCTCTGCTGGTGCTTTACTG
>A03:5M6M:264551_(reversed)	GTATGTGAGCTTCCCTGTCCAAACTCTTGCAAAATGTGCCAAAATGA
>A03:5M6M:297651	CGCCAAAAACTTACTGAACAACAACAAAAAATCACAAACTCAACCGC
>A03:5M6M:297901	GTTCTCTTGTAGTATGCTATATATACATGTGTTTCGATGACATCTGA
>A03:5M6M:262501_(reversed)	TTGAATACTTCAAACGAAGAGATAGTCGTTAAGAGAAGTTATTTAAC
>A03:5M6M:298401	GACGTTTCCTTGGTGAATTAAATATTCGTAAACATGACTGACGCCGA
>A03:5M6M:303451	TGTGATACGTAGTTTCATTCAACTCACTATTGCTAAATCAAAGTCAA
>A03:5M6M:258801_(reversed)	ACACAAGATCCACACACAACATTTATAACCAATATATACGATTATGC
>A03:5M6M:304201	ACAAGTAGTCTTTGGTGGACTATCCATAAGTTCAACAGGTTATTTCG
>A03:5M6M:304451	CCTCGACTGTAAGTTCCACCCGACTCACGTGCTACTTTTTGAATCAT
>A03:5M6M:304851	AACATCACGTTAAGTTTTGTAACTTGCGTTTCATTCGATGAATGTAA
>A03:5M6M:257251_(reversed)	CATTTATTTGGTGGCACGACGCAAATTGACATTCAACTTTTAAAGCA
>A03:5M6M:310401	GAAAAGCTAGTCTACGCTCAGAACCTAATGCAGTCAGCTATGAACCT
>A03:5M6M:310551	CCAACCAGCGTCTCCGACTCCGAAGACGAAACCTTCTACGAAGAGAA
>A03:5M6M:310651	TCAAGATGATTGCTGACTGCATGATCTCAACCGGATACGCCAAAGAA
>A03:5M6M:310951	AAGGAGCCTTAACGCTCTTCACCTTCCCGGAGAACGCGGCCAAGATC
>A03:5M6M:311101	CCGCCGTCAGAGCTCAGGTGATCAACTCGCTGGCGAAACTCGGCGAC
>A03:5M6M:311351	AGCTCGTCCGGAGGAGCTGTACTCGTCTCCGGTGTCGGTACGTATCG
>A03:5M6M:311801	GGTTTGTGCCGAGTTTTGCGAGGTGAACCGGTTCGGTTTGGGAGGAG
>A03:5M6M:311951	TTCCGGATCCGGAACCGGTTCGTCGACTACGGTTAAATCTCGTGGAG
>A03:5M6M:312051	ATGTGGTTAAGTGCATACAGTGATTATGTATGATCGTGTCATATAAT
>A03:5M6M:312401	TTAAATTTGTAACATGACAGAGAGGTTGAGAACGATAGTGAATCTTA
>A03:5M6M:313851	TTAACTTCAGGCTTCTTCTCAGGCGCTTTCGGCACCATAACCGTTAG
>A03:5M6M:314251	GTGAGAACGGATCGAAAACGTTTGACCTGCGTCCTCCGAAAAGGCTT
>A03:5M6M:314451	TTAGAAAGTGCACACTTTTTCTAAAACCTTCGCTTATTGTCTAGAGT
>A03:5M6M:315201	ATTGTGAAGATGGTTTTGGTTCCTAAATAATGGAAGGAGCTTGCATG
>A03:5M6M:315501	ATGTTCCTCTTTCATATGCAGCTGTTCTTACCAAAGGCTCCCCAACT
>A03:5M6M:315701	TGCTGCGTATAGCTGTGCTTCGTCTTTTGGCATACTGAAACAATAAT
>A03:5M6M:316001	CTGTGAACTCGACCTCAGTCTTCGCCGGTTCATTGGTCCAAGGGGAA
>A03:5M6M:316101	TAAGTCGATGCCAAGAGCAAGAGAGGTCAATTCAGGGTTGCTCCCGT
>A03:5M6M:316251	GGGAAACTGGGACTGGTTTTGTCTCTGCTGCTGATACTGCTGAATAA
>A03:5M6M:316351	CCAAGACCTTGTAGCCCACCAGTCTGGTGTCAAAATAACAATTATAT
>A03:5M6M:316451	ATGATGTATGCTGTGGCTGTTGTTGTGGACGATGTGATGAATATGAT
>A03:5M6M:316851	TCCTAAGTACTTGGACCATCTGGAAATGCGCTTTATTGAAATTTTGG
>A03:5M6M:316951	GGTAAGGCTGGAAAGTCCTCATTTTGAATGCGGAACTCCTGATTTTG
>A03:5M6M:317151	TACCGAGTTGTCCTTGAGTGCCACCAGCAGAACCAGGACGACTTGTC
>A03:5M6M:317251	ACCGAGCATCATATTGTTAACTGACTGAAGATGGTTCTGAGAAAGTT
>A03:5M6M:317701	TCCACCCATCATGCGGTTCTGTCCCTGAACACCTAACCCTGATCCGC
>A03:5M6M:318251	GATGAGAGTGTACCTTGCAGGTTATAACTCCCATGAAGGTTATGAAG
>A03:5M6M:318951	AAGAAGGAAATTGAAGTAGGAAAACCCTAGAATCGCGAGATTTAAGT
>A03:5M6M:319101	CGAGATTTATGGTGCGGCGAATCGGAGATTTTGATCGCAGAGATTGG
>A03:5M6M:330951	CAGAAACGCAAACGCGAATCTAAGAAGACCCTTAACCGCCGAAACCG
>A03:5M6M:331701	CAAAGCTTATACTTGGTCCGTATTATTAGTTGACATTCACAAAGATT
>A03:5M6M:333251	CAAAACTATCTTGCCATGGGAACCATGGAAGCGTCCGAGCTCATTAC
>A03:5M6M:333751	TCAAGGTATCCTAGAGTACCAGCAACTGCTGTGTCCTGAGATTCACC
>A03:5M6M:334001	TTTCTTTTGTAAACTTAGTATGAACCTGATGCTGCCTCCAAAGCCAT
>A03:5M6M:334401	TGGGTTGAAGATTGAGAGAGTACTTTAACAGCCACTTGTTCAGAACC
>A03:5M6M:335051	GAACCATTGAGATTGTTCCTGCTTAAGTTTCTGTTGAAAACAACCAT
>A03:5M6M:335351	TTTGAACAGCATCGGCTATGGTTCCAGTTAGACCACTTGAGGACAAG
>A03:5M6M:335501	ATTCTTGGTGGCATGGACATATCCGTGTTGCTGCAGTTTAAACCGTC
>A03:5M6M:335751	AAAGTCACGTACCATCGTTTTCATCTGTTTCGGACTGTGGAAACTGA
>A03:5M6M:336001	CTGCAAGTCTTCGGTCTCAGAAAAGTGTGCGTAATAGTAATAATTTT
>A03:5M6M:336101	GGTGTAGCTGCACTTTTAAGTGCGATTTCAGGTGGACGGTATCTGTT
>A03:5M6M:336201	ATGGATCCCATACGCGATCGTAGATATCGCTGGCGTACCTGCGGGGG
>A03:5M6M:336501	CACTTGAAGCTGACTTACCGGATCTGAGAGCTTGACTCGCTAAGATA
>A03:5M6M:337101	TTGTGAGAACCAAAACGTTTGTAAAAGAATTGGTCAAGCAAAAAAAA
>A03:5M6M:337301	ACTTACCTCCGGGTGAAAAAATCAAGAAACCAATGGCTATGCTGCTG
>A03:5M6M:333351	GACACTCTTTTATCTCGTGAATAACCTGAGACATGGATGGTCTCTTT
>A03:5M6M:333451	ATTTAAGTCGTAATCCTTGTGAAGGTTTGGATCCATAATCTCAGCAA
>A03:5M6M:333551	GAGGTCTGATTAATCACAGGTTGGTTTGTGATCATCTCCAATAATAC
>A03:5M6M:336601	CCATCGGCCGCAGTTCCAAAGAGGATATTAGCGGTTTAGTTTCCCCA
>A03:5M6M:336751	TAGGTCCAAGATGAAGATCAAACACCGGTTTCATGCCAAGACCATCA
>A03:5M6M:334751	ACAAATAAAAGAACCAGTACAGCAATGACAATGGCTGCAGAAGCAAC
>A03:5M6M:334851	CAGAGAGACAAAGCCTTGGATTTCCTTCAACGCTACAAGAAAAAATG
>A03:5M6M:335951	TAATATTGTATTCCATTCCATGTCACGTTGAATTCCCTGGTTTCATT
>A03:5M6M:336951	CCGCCCTGTGTGAACTTTTCATCCGAATAGAACCAAAGTCCATTAGA
>A03:5M6M:337251	CCAAAATTGCAGTTAGCACCAACAAGAGCCCAAGAGAAGTAGCCATA
>A03:5M6M:338101	AAAACACATTGACTTATAACATTTGGTGCAATCGCGCTTATTTCGTA
>A03:5M6M:338451	AGGTATGCTAATCTCGTTTTACTTGGTTTTGTTAAGAGATTAGCAGA
>A03:5M6M:342051	CACATTAACCATTGAGGGACACATGGATCTCCTTGCCAGCTGATTCT
>A03:5M6M:348751	TGAATCGCATTACTATTAGCTTAATGTCTCTTAACTAACATTTGCTC
>A03:5M6M:349751	TTCTGCGCGACTACGTACAAGAGCTGGTCTCTGTAGAAAAAATGGCC
>A03:5M6M:349901	TTCTTCTCCTCGCTGAAAACTCGCATCCCTTGCATCGCAACGCGGGA
>A03:5M6M:353051	AGACCACCTCTCTAAACTGAGCCGCACCGTTTTCTTCGCTGCTAGTC
>A03:5M6M:350801	ATCATTGGATAACAAGATGATGTGTGAAACTGTTGAAACCATGAAAA
>A03:5M6M:353901	CATGGTCATCAGGCAATGCTACTAATCCATTTACACTTATACTTTGT
>A03:5M6M:354001	TTACAAGAGTTCATTAAGAAACCATAGAATCTGACAACTTTCAGTAT
>A03:5M6M:352251	GCAGGCATTGTGACAAATCTAACGAAGCCAGTACAAGAATGCACCAA
>A03:5M6M:352351	CAAAACAAATCGATCCTATTACTCTCCTGCATCACTCTCAGTGCCTT
>A03:5M6M:352601	CATTCAGTCGAAGCACGTGTTGGACCACGTAGTTCCCATGAGCATCG
>A03:5M6M:350151	TCACTTCTCTAAACTGAGCCGCACCGTCTTCTTCGTTGCTAGTGATT
>A03:5M6M:355401	GACAAATTCTATTAACCGCTCCTCAGACTTCCGGTTTATTCTTAACC
>A03:5M6M:356651	AAGCTTTCCTATCCTCAATGCATCAGATCTGAAGTTTCCATCTGTCT
>A03:5M6M:356901	TGATTTTCAGTTTCTCACCATCCCAGGTACTTTAACTGACTCTGATC
>A03:5M6M:357051	TGATGATATTGCTTGTGTCATCTACGATGAGTATATGTACTTCTCTG
>A03:5M6M:357301	ATCCTGAAGTGCAAAACAGTTTGTTTCCAGGGTTGCATCCTCTAAGG
>A03:5M6M:357451	CAGCTAGCTGTCTAGAGAGCTCGTCTTTGTTACGGCTACAACGAGAA
>A03:5M6M:357551	TTCTAGTTTACTAGAAGAAGACAGAAGCTGCATTGAGTGGTTGAACA
>A03:5M6M:357851	AGGGTTCTGGAGTCACTGTGGATGGAACTCAACGCTAGAGAGCATTG
>A03:5M6M:358001	ACTGGAGAAAGAAACTGTGGAGAGAGTTGTGAAGAGGTTGATTGTGG
>A03:5M6M:362501	TCCATTTATGTATTTTATCAACTTGGCACCTATATACGTACTTAGTC
>A03:5M6M:362851	ATGGGTTCCACAAAGGTCCCCCCACAAACAGCAAACACGGCGTTTCC
>A03:5M6M:363151	CGTCGCCGTCAACGCCAATAACGTCGTCGTATTGGTGTTACAGCTGC
>A03:5M6M:363251	CGTCTCTTGCCCTCACTGCGACGGCGGTTTCATCGAAGAGCTCACCG
>A03:5M6M:363351	AGATCGATCATCAGCAACCGCAGATCTATAATCAGACGCCGGAGATC
>A03:5M6M:364001	TGTGTTGACGGAGATGGACGGTGGTGGGATTGGTGGTAATAGTGATG
>A03:5M6M:364551	AGAATGCTTGCCCTTTAAGCTTTTCTTTTTCCTTGGATGGTGAGAAA
>A03:5M6M:365501	ACAAGACAAAAAATGGCCTCTATCGAATTCGATCCTTATTTGGAGCG
>A03:5M6M:365901	AGTTTATCTACAATAGTAACTTTGATCTATACAGTTCTTCGACTTCT
>A03:5M6M:366001	TGAGGAACTCCCAGTGACTTGCAGGTGACGGAACAGACTTTAACTTC
>A03:5M6M:366201	GTGATGAGTTTAGGTGGTTTACTCTTTGAGCTTCTCTCAGAAGCACT
>A03:5M6M:369551	GAAGACTTTGCTTATGATCTGCCATTATTACCCACCTTGTCCACAAC
>A03:5M6M:366351	ATAAGTAAACACTCAGACAACTCCTTCCTCACGGTTCTTCTTCAAGA
>A03:5M6M:389601	TATTCCAGGAGCTCTTGTCATCAACATGGGAGATTTCTTGCAGGTAA
>A03:5M6M:379401	ATCATAGGGTGCTTGCGAATAGACAAGGACCAAGGATTTCAGTTGCA
>A03:5M6M:382301	CTCAAGTAAACATGCCAATTCCACAGTTTATGGACCAATGAAAGAGC
>A03:5M6M:370051	TCTGGATGGAACATCACATCTCTTGAATTTCATGATTTGAATAAAAA
>A03:5M6M:378201	ATGGAGCGCAAAGCTTTCGACGAGACGAAAGAAGGTGTAAAAGGGCT
>A03:5M6M:369001	TCTCGTCAACAAAAACTTTGTATACTATAGTAACTTCGATCTATACA
>A03:5M6M:369601	ACCTAACTTTGGGGATAAGTAAACACTCAGACGATTCCTTCCTCACG
>A03:5M6M:369701	GGTTGATGTCTCTCCTTTTCCTGGAGCTCTCATCATCAACATTGGAG
>A03:5M6M:369901	AAGGATATCAGTTGCAAGCTTTTTTAGCTCAAGTAAACATCACAATT
>A03:5M6M:370001	TACAGAGACATTACCATAAAAGAATACACAGAAGGATACTTTGAGAA
>A03:5M6M:368901	ACCATGGTGTTCCTTTGAACGTTCTTGAAGAGATTAAAGATGGAGTT
>A03:5M6M:378601	CACCATCTGTTAACTGGAGAGATACTTTCGCTTGTTACATAGCTCCA
>A03:5M6M:378951	TAACATAATTGATTGACCCAGGGATGCTATGTTCGAATACTCAAAAC
>A03:5M6M:379051	TTGGAACCTGATATCCTGAAGAGCAAGGAGTGCTTGAAGAGTTTGCT
>A03:5M6M:379151	CAAGTAAACACTCAGACAACTCCTTCCTCACCATTCTTCTTCAAGAC
>A03:5M6M:379251	TCTTCCTGGAGCTCTCATTATCAACATTGGAGATTTCTTGCAGGTAA
>A03:5M6M:379351	CATGTTTGGGTTTTTGCAGCTGATAACGAACGATAAGTTTATTAGTG
>A03:5M6M:379551	AAGAATACACAGATGGATACACTGAGAAAGGACTGGATGGAACATCA
>A03:5M6M:380451	TCATCTACAACAAGTCACAAAGCCAGTGGTGTGTCCAGAACAAGACA
>A03:5M6M:380751	AAGGAGTAAAAGGGCTGGTCGACGCTAAAATCGCCGAAGTCCCTCGT
>A03:5M6M:381051	AGAAAGAATACTTCACCCGTGATAACGCCAACAAAAAGTTTGTCTAC
>A03:5M6M:369051	CTTCGACTTCTGTTAACTGGAGAGATACTTTCACTTGTTACATAGCT
>A03:5M6M:381701	TCTATGCTCTGCCATTACTACCCACCTTGTCCACAACCTGACCTAAC
>A03:5M6M:369651	CTTCTTCAAGACAACATCGGTGGTCTACAAATTCTTCATCAAGACTC
>A03:5M6M:381851	GCTCCTCTTCCTGGAGCTCTCGTCATCAACGTTGGGGATTTCTTGCA
>A03:5M6M:382201	ATTTATTGCAGCTGATAACGAACGATAAGTTTGTAAGTTTGGAGCAT
>A03:5M6M:382401	ACAGAAGGATACTTCAAGAAAGGTCTGGATGGAACGTCACATCTCTT
>A03:5M6M:378551	CGCCATCAAAAACTTTGTCTACAATAGTAACTTCGATCTATACGGTT
>A03:5M6M:381651	TAGGTCTAGAATCTGAGATACTTAAGAGCAAGGGGTGCTTGAAGGGT
>A03:5M6M:379201	ATCGGTGGTCTACAAATTCTTCATCAAGACTCTTGGGTTGATGTGGC
>A03:5M6M:382251	GTGCTTGCGAATAGACAAGGACCAAGGATTTCAATTGCATGCTTTTT
>A03:5M6M:382501	AGCATCAATCTCTCTGTTCTTGGATCTGCAATAACTTAACCAGTATA
>A03:5M6M:390551	GTGAATGGTCTTGCCAATAACAAAAGCAAGAAAGAAACATGTGCATG
>A03:5M6M:366701	GCTTGTGTCTGAAGAAAACCCTCCAAAATACAGAGACATAACCATAA
>A03:5M6M:390001	TATGCAGTAGCTAACCCAATGTATCAAAAATAAGAAAGCATAGCATA
>A03:5M6M:389351	TGATGAATTTAGGTGATTTGCTATTTGAGCTTCTTTCAGAAGCACTA
>A03:5M6M:389451	GATCTGCAATTATTACCCACCTTGTCCGCAACCTGACCTAACTATGG
>A03:5M6M:389751	TAGAGTGCCTGCGAACAGAGAAGGGCCAAGGGTTTCAATAGCGAGCT
>A03:5M6M:389951	CGAATATTAGGATATGAATTAAGTGCATGATCAGCTACTCTGTTCTT
>A03:5M6M:391601	AGGAGATTTAGAAAATTAAGGGGAGCCACGAATAGCATAAAAGCATA
>A03:5M6M:391901	GGCTTAACTTTCAGCTGACGAACTTTATCAACCAGTGAGCTCAGGAA
>A03:5M6M:392001	ACACACGAACCTTTTCTGTCTGAGAATGGAGCTTATCTCAAGCTTGA
>A03:5M6M:392951	CATGCACCTAGTTGAATCTATTTTTCCTATATCGTATGCGGGTTGTG
>A03:5M6M:393101	TGTAAATGCTAACAGACCTAGGACCCTCGTCAAATACAGATACGACG
>A03:5M6M:393251	GAAAATGTGGTATAGTCACGACCATTAGTATGGTCCAAGGTGTTATC
>A03:5M6M:393401	TATACCCAAAAGGAAGCTGTTGATCCAAGGGTTGAAATCTTTCTTTG
>A03:5M6M:393601	ACTTCAACCCTTGGAGGTCGATCTCTGTCGTTACGAGCACATCGAAA
>A03:5M6M:393701	CAAGACCGTAGGCATCATCAAAACAATGGAAGTCACTGCCGCATTTG
>A03:5M6M:393801	GACACACAATAGTAGACCAGTGCAGTGAACAATCTTGTACACTTTGA
>A03:5M6M:394001	AGTCCATACGAGACGAGTGCTGCTCGAGGAAGGTCTCATCGACAAGC
>A03:5M6M:394101	AACTCTTGAGAGGATTTCATCTTCCAATTCGCGTGGAACATTTACCC
>A03:5M6M:396851	AAAAATGACACGTGGAGAAATCGTGGGATGTGGACGTGAGTGAAAGA
>A03:5M6M:396951	ACCCATTGAAACGTTTGGCTCTCAAAACATTTCGACTTCTATTTATA
>A03:5M6M:397801	AACTCTGCCTTTCTCTTTACAAAATCTATGGAACTACTATGGCTGGT
>A03:5M6M:398051	GGAGATTGCCATACGCAACACTCAAGCCTGACCCTGTTTTGAGGAAC
>A03:5M6M:398201	GCACACAGGTTTTCACTAATGCAGACAAGGCTCATGCAGCCAAGATC
>A03:5M6M:398301	TCTCAACCCCACCACCAAAACTGAATCTCCTGTGGCCGCTACTGGAA
>A03:5M6M:49301_(reversed)	ATTTACCACATTTACCAAGACTTGGAGGAATGATTCCTTCAAAACTA
>A03:5M6M:48401	TTGTAGGCCTATGAGATTCCCAATGCCATGAGGAATGCTTCCAGATG
>A03:5M6M:407051	TGGTCGTTTTCCACTAAACATTTCAAAAATGAGAATCCCAAAGCTAT
>A03:5M6M:408001	TCGCATTTCGAAGATCTCCATAACTTATCATTTCATGAAAAAACCCC
>A03:5M6M:408401	ATCAACCTCCTTAATACCCACCAACCCACTTATATCTGGAATGATTC
>A03:5M6M:49501_(reversed)	TGGGAGTTTCCCTGATAGCTTATTGTGAGCAACATTTAACATACCAA
>A03:5M6M:407901	ACTTTAACTGCAACAACCTTGTTCTCAGCAGGCAGAAGGGCTTTAAA
>A03:5M6M:409151	CAAATATCGTATTTTTGCAAAGCTCAGAGGGATACTTCCTGTCAGAC
>A03:5M6M:406851	ATTCCCAAGCGGTTTGCTGGAGACTCTTCAGAACACCCAAGTCCCAC
>A03:5M6M:408051	GTGGAAGGAGTTTCTTCGTTGATCTTTTTCTTCTTTCTGCTTTTTAA
>A03:5M6M:408501	AAAGTCTCTGGGAGTTTCCCTGATAGCTTATTATGCGCAAAATATAG
>A03:5M6M:408601	AATTATTTGACATGCGTAGGGAAACAAGGGTCGGAATTTGCATAATC
>A03:5M6M:409101	TCTCCAGCTGAAAAACTTCCCAAAGAATTGTCATTAAGGGCTAGTGT
>A03:5M6M:412001	GGTGACCAAGCTTCATCCCCTGAGTTCGCCATAGACCAGCTTAACTT
>A03:5M6M:412201	AGCATGTTAACTCACGTCAGGATTGAAATCTGCTTTCTTGCTTCCTT
>A03:5M6M:412751	TCACCGGCGCGAGGAGAATGCTTCAAAAAGAATTATTGTTTAATTTA
>A03:5M6M:413351	TCTTTTGCCAATACCATCACCGCCACGTGCAATTCTTACCAAAATTT
>A03:5M6M:413951	GTGTGATTAGAAGCACTTCCTATGCACAATTGATGGTCCTGATTCAT
>A03:5M6M:415351	GTTAACAATTCCATGTTCAATTGGGTATTTGAGTGTCAAGATACCAC
>A03:5M6M:415651	GTCGGCCATTCTTCAATCACAAAACTGGATCCTGAAACGCCTCCTAT
>A03:5M6M:415751	GAAAACAGTTCTTGGCCGTTAGTTTTTAGCTGGAACCTATATGTAAG
>A03:5M6M:416551	CTTTCGCTTTTCCTGTCTCTTTGAGTTTGGTTCTTCCTTCACGTGTC
>A03:5M6M:417501	GTTCAGATTAATTATTAGTGAAACAAACCTTTCGGCGATACATCGCG
>A03:5M6M:418551	AGGAGATGACTTCAGTGTACAAGGAGAAGCCAGAGGAGTGAGACCAG
>A03:5M6M:419001	TATCCCTAACCCACTTATAGTCTTCATTTTTGTCACCTCAAAATTCT
>A03:5M6M:419151	CTTGCCTTGATAGTAAGCAGATTGAAAGAGAAAGATAGATTTGTGTA
>A03:5M6M:419901	ATAATAATTGGAGGTGCCACGAGGGGAACACAGAACATATGACTGGA
>A03:5M6M:421301	GGGAATGCTAACACCGCACTTTCCAGGAAGACCAGCGGCTAGACTTG
>A03:5M6M:421401	TGACGGTCTGGTGTGGTTTGAGCCATACCGTTCAACTTTGTGACTCC
>A03:5M6M:421551	GCAACTATGCACACCGTCAATACAAGGCATGTGAAGAACCTCAGGGC
>A03:5M6M:422251	GCGGCTACGAGTGAGAAACAGAACAACAGCTCAAAGCCTCCTCCTAC
>A03:5M6M:422851	ATAACTACTTCACTGGATCAAAAGAAAACCTCAAGAAGTGGATCGGT
>A03:5M6M:423301	TCTCTTAAACATTGTGTTCTTCTCTTAAAACAGAATCCTGCTCACTT
>A03:5M6M:423401	TGGGGAAACGTCAACCCTATTGGTGTAAGGAGTTGCTACGACGAAGG
>A03:5M6M:423601	CATATGGTCCTCGGATGAACATAGATGATGGGCGTGTGGTGAGCAAC
>A03:5M6M:423701	GCAGACCCGCAGTTTCTGTTATGTATCAGACATGGTGGATGGGCTTA
>A03:5M6M:423901	CTGGCTGAGACGGTTAAGGAGGTTAGAATCGGTTTTGTCTGAACCGT
>A03:5M6M:424001	TAAACGCATGCAGCTGATTAACCCGAGCATAGAGATAAAGATGGTGG
>A03:5M6M:424551	AAATAGGCTTTGAAAAGTAGCAAATTGATATATCCAACTTCCACCAT
>A03:5M6M:424951	ATTTACTCTAACTCTAATTCTATCTAACACGAGTGAAAATAACCATC
>A03:5M6M:425051	TAGTGATCTATAATCCCACACTTCAGATAAAAACTAGTTTAGTGATG
>A03:5M6M:425401	TTGAATTTTTTGACCCCTAAAGCTTTAAAGAAGTTTACATGTCCTAA
>A03:5M6M:427301	ATCGACTCAGAGCAAGAGAGTTTCCAACGTTGGTCTTACTCTACTTT
>A03:5M6M:427401	CGATAGTCTTATGTCAAAGATTCTTCACTCGCGAATCCCTGGCGAAG
>A03:5M6M:427551	TACATGGCAAGGAACCGTCGACAGAGATGTGCGCGAGATTGAAGGGG
>A03:5M6M:427651	AATCGAACACCCTTATGAACCGGCTCTGCATTGGGTTAGGAGATGGA
>A03:5M6M:427751	AATGACGGTTTAAGGTCGTCGCTTTGTTTGCAGTTCAGGCCGAGTCA
>A03:5M6M:427851	CATGTGATGGGGAGAAAGATTGGTGGCTAGAGTTCCATGTAACCAAA
>A03:5M6M:428801	GCCATGGGAGCACTAAAAAGGAAATCATCATCCAATTCCACAACCTT
>A03:5M6M:429801	TCATACCCTGACTTTGTAGTATCAAGCCCTAAGAACCATAAAATGAT
>A03:5M6M:430101	ACAAGCACAAACTGAGGGAGGAATCTCGTAAGTTTCCCTGTTACCGG
>A03:5M6M:430201	GCTAAGGCGGCGATAAACACGCCAGCGTTGAATGACATGACGGCGAG
>A03:5M6M:430301	GTCCGGAGGCGGCATTAGCTGAATCTTCGGTGGTATCACGGAGGAAA
>A03:5M6M:433301	TAAGCATACTAAGGAGATGGACATAAGAATGAAGACGTAATAATCAA
>A03:5M6M:433551	CTGATTTTACTAGAACCATCTTAAGGAACCACCAATAAAAAATAACA
>A03:5M6M:433751	TCCATTCATGTGGCAAATCTGCCAACGGTTCTTGGTGTCTCTCGGCC
>A03:5M6M:434251	TATCAGAAGATAATGTAGAAGGAACGCCCAATTTGTCAAAGTGAATT
>A03:5M6M:435701	AGGTTGTGGTAGCTTTTTTCTTTGTGTCTTAATGCATCATCATTTCG
>A03:5M6M:435951	TCTGCTCATCGATGAGAGCTTGTTTTGATTGAAAAGGAATTATAACA
>A03:5M6M:436051	TCGGGAAGGACCGACAGGGCTGCTATAACCTGAGGCGAATGGTGACC
>A03:5M6M:436301	ACTCGTCTTCACCTTCGTTTTGTGGCTTTGGTGAATCCGGGTCCGAG
>A03:5M6M:436501	AGAGAAACAAACAGAGGAAAGCAAGCACAAAGAGAAGAGAAGAGAAG
>A03:5M6M:437751	GACAAAACTATAGTATATGTTTCTTCTTTCTATGCGATGTTTTGAAG
>A03:5M6M:438151	TTCCTACTCCCACTAGCTAATTGCTTTTGGAATTCACATTCTAATTG
>A03:5M6M:438301	TAAAGTCTTTATCTAACAACCATCAACCATGTATATATTGGACTTTC
>A03:5M6M:438351	TATGGGATAATCAAACTTCTAACACTGACTTGTTTTCCTGGATGTAA
>A03:5M6M:438751	CGTCCAGCATCTCCGGCACGAAGCTCATTCGTTAGAAGCGGCAAGAA
>A03:5M6M:439451	CTAAGAATACTCACTGTAGGGTAAGTTTGGTTGGTGGTGGATCGAGG
>A03:5M6M:439701	CCTTGTGAGCCATGTTTGGAGCTTTGACCATCTCTTGCAACGCCCTG
>A03:5M6M:439801	CAAGAAACAAAACTTGAAGAAAAGGAAGGTAATATAACCTTGGAGGG
>A03:5M6M:440501	AGCTATCTTAAAGAGGATAAGTCCGGCACCGGATCTGATGTCCAACC
>A03:5M6M:441501	TCACGTGATGATGATACACGTTGTCTACACGTAGTTGGGAAGAGAGA
>A03:5M6M:441751	CGTACATTTGTCAATTTATATACTGGTAGAGTAAAAGCATGTAAAGA
>A03:5M6M:442451	TGGAGTCGTATCTTTTGTTTGGTAATTAAAGGAATGATATCTAAATG
>A03:5M6M:455151	AATACTTAATTGATAGCACAACAACATACGTTTTCAGCATTACAAAC
>A03:5M6M:445551	GTATAAGCTTCATTCTCTTACAAAACGCAGTGCAGCCTCTTTCCCCT
>A03:5M6M:450351	CTATCAGTATAAACAACAATGGGACTTCTGACGTTATGTCTCCCATC
>A03:5M6M:450501	ACACTAGGCGTGACCATGATGGTGAGCTTAGATCCATGACCCGCGGC
>A03:5M6M:450751	CACAGAGAAAGGCAATGTGGTCTTCTTTGCCTAGTTCGTAGACAAGT
>A03:5M6M:451051	ATTAGGGTAAAACGATTTGACATAGGCAGCCACACCTGCAACATGCG
>A03:5M6M:451501	AATGTAAGAGACGAGAGATTCATAGTCTTTTTCTGATAAACCAGAAG
>A03:5M6M:451651	CACTAGGACCTTTCCCTTCACAAGTGATTCTCTTAGACACTGTGGCT
>A03:5M6M:451751	ATCACAATCAAGTTAGGGTTTCTTGAGGAGGGTACTCTGCATATTCC
>A03:5M6M:452101	CCTTTGGTCATAGCGTGAAAAGCCCCAATGGCGATGGGGTCGTCTAC
>A03:5M6M:452201	CTGCTATAGCGTCGTCGAATGCAGACAAGAGAGCTTCCGAGCTACAT
>A03:5M6M:452651	TGAAATTTTGACCGCCAGAACAAACACCTTTCCATCTCTTAGGAGGA
>A03:5M6M:452751	GAGGACTCCGATAATGGTATCACTTTCCACGTTTAGGTTCCTCTTTG
>A03:5M6M:453001	TCCGACGTAGTGAGCCGGGCAGCGAACCCGTTGAAACTCCTCTTGTA
>A03:5M6M:465401	GACTTGCAGAGGAAGGCATCTTTGGGTCAAGACCGCGGCCAGAAACA
>A03:5M6M:465551	TGTATGTAGAGTTGGAGCCACCGACGTTAGTAACGGTTCTCTTGAAA
>A03:5M6M:465651	GTTGAGATCTCGAGGTAAGATCTTTTCAGTGCAAGTGACGGCTTCCC
>A03:5M6M:466101	ACATGTGTGGTGTCGTCATAAAACGGTAATGCCTTAAGTGAATTTGC
>A03:5M6M:466301	GAGAAGGAAAGAACTTTCGGAGCTGTCTGATTAAAGATTGTCTCACT
>A03:5M6M:466451	TGATTGTTTAATTACTTTGAGGAGTTAATGTAAGAGAGGAAAGATTC
>A03:5M6M:466551	CTGAACCATCTTTAACAATAGCTGCTACAGCTCCCTTTGTATAAGCT
>A03:5M6M:466751	ATACACAAATGGCTTTTCTTGCGGAGGAAGTTACTTACTCGGCGCAC
>A03:5M6M:467001	GTGACAAACACACGGTTCGTTGTGCTGGCCGCAACGGTTAACATCCA
>A03:5M6M:467151	GGGTCTTCTTCCAACGGGTACACATCGATACTACCTACAGATATGGT
>A03:5M6M:467251	CGTCTCTACATTCTCCGGCGCAGACTCTGTAAGCGGCGATTCTAGAG
>A03:5M6M:467401	TTGAGTCCCTAGCGTCTCCTGGTGAGTAGTGTCTTGCTCCAATCAGC
>A03:5M6M:467901	GATTCCGGCCATATTCCACCGTCTAAAACTCCAATAATTGTCTCACT
>A03:5M6M:468451	CACGATCTCTTGAAGAATACTCATGTGATGGGACATTGGTGCGTAGT
>A03:5M6M:469001	AAATAAAAAACAAGTGACACTTAGGACTGATGTTTGTGGCATCTGAT
>A03:5M6M:469601	TATAATCCCACATAAGTGCTCCAGGGATTTACATCTTTAAGTCCAGA
>A03:5M6M:469751	TTCAGGCTCGATGTGGAACTCCGTCTCCTTGCCTCTGTAATATCAAA
>A03:5M6M:470301	TATCTAAACACTCTTAGTTTCTCATGAGAAAACGATAAAAGGCTATG
>A03:5M6M:470501	AACCGAACAAGAAAAACAGAGGAGAGGAGGAACCTGGAGAAGTGAGC
>A03:5M6M:471651	GCTCAGATATGGGACACTGCAGGGCAAGAGCGGTACAGGGCATCACA
>A03:5M6M:472701	GTGAAAACCACTAACCTTCGATAAACTCACCCATCACACAGATATTC
>A03:5M6M:473351	GGCTGTTTGAGTACGGAGGCTTCCCTCCTACAGCTAACTATCTGTTC
>A03:5M6M:473651	GTGGCCTTTCTCCCGATTTGACCAACGTGGAGCAGATTAAGACCATC
>A03:5M6M:473751	TGATCCGAGCAAAGATGTCAAAGGCTGGGGGATGAACGACCGTGGTG
>A03:5M6M:473851	ATGGATCTCATCTGTCGTGCCCACCAGGTTGGTCTTGGTCTATAACA
>A03:5M6M:474251	TGACTTTGTATTTTGCAGTTAGAACCTGGCGGGAGGGACATTTGAAG
>A03:5M6M:475601	TTTTGGAGCGCAACATGCAATTACATCCACGATTCTTTGGTCAAAAC
>A03:5M6M:475801	AGTTCCTTTGAGGCCTTTGAATTTTTAAGATATGCATATTCATTCAA
>A03:5M6M:475901	GTAACTGGAATAGAAAGCATAGGAAAAGGATTGATCCGAGACGGGAC
>A03:5M6M:477151	GATCGTGCGCACCATATCCATAACTATATTCACAGTGCAACTTAAAT
>A03:5M6M:477351	ACTTCGATGTTACTTTTATACAGAGGATGACTTGTGATAAATGTTAT
>A03:5M6M:477451	TGGTTGTTGATTCAGAGTAATGGACAAGGCAAAACAATAATATAAAG
>A03:5M6M:470401_(reversed)	TTGATAGTTTCTGTCAAATCTTGGTTATGAATCTGAATCGAATTGAG
>A03:5M6M:470051_(reversed)	ATTCTAGAGAAGATCTGCCAGTACTTTTATTGGTCTCTACAATACTC
>A03:5M6M:486551_(reversed)	AGGCATTGCTCTCTTGGTTTGACTGTTCGCCAGCAACGTTTATAGCC
>A03:5M6M:485601_(reversed)	TAAGAGTCGACAGATGGTGATGTGGAGATCCAAAAGCAAAAGAAGGC
>A03:5M6M:488801	TATTAAAAGCATATCATAGATGCTGACAGATTCGACCAATAAAAATC
>A03:5M6M:489551	TACCGTCTCAACTCCTCAAAGCTAGCCTCTTTCCCTCTTAAGGTCAA
>A03:5M6M:489951	GCAAGAAGGACACAGGGTGGTCTAAGCTTTTTGATAACGGTAGTGGT
>A03:5M6M:490051	GCTCTTCTTTGGGCTTAGGTTTGCTCATGGGCTGTACAGCCGACTGT
>A03:5M6M:490301	TTCTAACTTTTCTTCTCTTGTCTGTGTGCTAAAACAGTTTGTGGGAG
>A03:5M6M:490401	TCTTTAAGATCTTTTCTACACAAGCCTGAGAATAGGTCTCTTTCTTT
>A03:5M6M:490651	CACCTGAAATGATTAAACGGAAACCACACGGGAGAAAGGCTGATGTG
>A03:5M6M:491001	TTCGCTGGAACGTGAAGGGTGCTTGAATCTGAGTTCAAACAAGATTT
>A03:5M6M:491251	ATCCTGTCCTGTTTTTGTGGGTTGTGATGTGATCTGTAATCTTTCAT
>A03:5M6M:494301	AGTTTATAGATCTTGAATCAAAAACTCACCAGATCAAGAAGAACGAC
>A03:5M6M:494601	AGACAAGGGATTACTACTTGGATTCACGAAGGAGAAGAAGCTTTGAT
>A03:5M6M:495001	CGGTGATGTTAGCGAGAAACTCATGAGAAGCTACAGCGTTAGCGCAA
>A03:5M6M:495251	AGTTACTCGCCAGACAACCTCAGAAACAATATGGTTAGATTCTACTT
>A03:5M6M:495701	GGCACCGTAGAACACAAATGGGTCATATAAAGTTTTGTACTTTCCTC
>A03:5M6M:495901	CCTCAGCCACAGTTTCTGAGCCTCTTTGTCAAACTTCTTCTTCTCCA
>A03:5M6M:496351	TGAGGTTACATGATTTCGTTCAGGCATTTCATCGAACAGCTTACATG
>A03:5M6M:497151	CCTGCAGTTTGAAGCATAAGACGTTTTGTACAATATATAAACTAATA
>A03:5M6M:502401	TACTTTTTGTTTGTGGCAATCTTGCATGACCACACCTCATACATAGA
>A03:5M6M:502751	CATCTAAATGATATACGACCAAGGTGACTACAAACATTTTTTTTATG
>A03:5M6M:503101	CCTAAACACTTAATTAGGACATATATCAATGTGATCCGTGATATCAG
>A03:5M6M:503401	AAAAGGGTGATCTGATTAGATCTTCTTAAGTCATTTATGGGTTTACG
>A03:5M6M:505151	GGGTAAGCTCCAAGGTAGCTTCTTCAATTGTATTAATAATATTATTT
>A03:5M6M:505301	CACCAAATCTGGAAAACCAATAGATTCATTTTCTTTCTTCTGCAAAA
>A03:5M6M:505451	AGATTCCTTGAAGGTGGGTCTAAGCAATATATTTCAAAGATTTCTGA
>A03:5M6M:511301	CGGCGTATGACTTCTCTATCAATATCAGTATCATAAATATAGGACTC
>A03:5M6M:511601	CTGAGTTCTGCTTTGTTGAAACGGTTGTGTTCTGACTCACTTTCTTC
>A03:5M6M:511901	CACTGAGCATGTTCTGGAGACAAAAGATCACCAAAGCGAGAGAAACT
>A03:5M6M:512001	CAAAGCTATCTCCACTAAGAATAGGTCTTTCCTCTTGAGGGTCATAA
>A03:5M6M:512501	TTAGGAGACTCCTCGAAATGTGGTTTACGACCGAGAAGGTCATTGTA
>A03:5M6M:512701	AGATGGAAAACTCAATCCCATCTTTTCTCGGGCATATACTACACCAC
>A03:5M6M:512901	ATGTTGCACCGGTCTCCTTCACGTCAATACCCATTTTCTATACAATC
>A03:5M6M:513951	CCAAGCAAACCCAATTTCTTATAGTAGGCTAAACTACCATTGACCAA
>A03:5M6M:514701	CCACGATCTGTTAGGACAAGGAATCTTCAACAGCGATGGTGACACAT
>A03:5M6M:514901	TGTTTTTGAGGTTGACTTTTGACAACATTTGTGGTTTGACTTTTGGG
>A03:5M6M:515001	GTTTGACACGGCCACCGAGGCTACTCTAAAGAGGCTTCTCTATACCG
>A03:5M6M:515151	TCGGAAAAACTCTCCTTCCGATGATCTTTTGTCACGTTTCATGAAGA
>A03:5M6M:515251	CTTAACTTTGTTCTTGCGGGTCGCGACACTTCTTCAGTGGCTCTGAC
>A03:5M6M:515351	ACGAGTTATCGACGATTCTGAAGGAGACACGTGGTAGTGATCAGGGG
>A03:5M6M:516001	ACTTTCGTGCCAAAAGGCTCGACGGTAACCTACTCGATTTACTCGAT
>A03:5M6M:516401	TTGTCATTTGAAGTTTAAATTGTTGTAAGCAACCTACTTTTCGTTTG
>A03:5M6M:516751	AGAAGCACATAAACCCTAATTATTTTGATACGAGAAGAAGCTTGTAT
>A03:5M6M:516851	AGATAGAGAATGATCATAATGATGATCGCATAGTATCATAATGATGA
>A03:5M6M:516951	TGCTCCCTTGAGTAGAAGCAGAGATCATCTCTATCAGATCCATATCT
>A03:5M6M:517201	ATGATGATGAGTCTGAACAACGTTGTGGGAGTTAGGGTTAGGGTTCT
>A03:5M6M:517551	CGCTATCATTGTTATCAGCGTTTGCTTGGCGTTTCTTTTCGCGTTTT
>A03:5M6M:517951	TTCCGAGACTATTGCCCATTTCCTCTCCCCATGTTGCCTTACCAACC
>A03:5M6M:518151	GATAAGATTCTTGTATGGTCGCTTCTTCGTGGTTGCATCTTTAACGA
>A03:5M6M:518251	GGACCAAACGTCGTGTTCTCTTTGTTATCGTTTACAATCTCAGTCAC
>A03:5M6M:518401	GTCAACGGAGGCGCTGCTCCGTGGGCAATGCGCCGGTGCTCCATGGA
>A03:5M6M:520601	TTCTTGCTAACTTCTAATAAATAGATACATGTAAAGATTCACCAGAC
>A03:5M6M:520701	GAAGAGGCAAACGCTTGATCTGGAACCACCAGTGGTAACTTGTCTAT
>A03:5M6M:521151	GGTCTTCGAGGTCTGTGATTCCCCTTTGTAGTTGCAACAAGGACGGG
>A03:5M6M:521301	TTCCTCTCGTAAACCGACATTGTGGTTTTCCCATCCGCATAAGTCTG
>A03:5M6M:521451	CTGAGCAAGCCGAGGGAACCAGCGAGGTGACAATCAGTCCACTGTAC
>A03:5M6M:522151	GAATATCGGCTTCAAGAGCTTTAAGAGAGTCCTTGAAAGACAGTTTA
>A03:5M6M:522351	GAGTTAGATGTTTCACCCAATCCGATGATCAAAGTTTTAGGGATAAT
>A03:5M6M:527151	GTTTTAAAGTTTGATATTTTGTTTCTTCTTAGGCCTTGAATGTGTTG
>A03:5M6M:527751	TCTCTGTTCAACATTCCCCAGAGTACTAAACACGAACCGAAGACAAT
>A03:5M6M:528301	GAGGGAGGGCTCATGCGGCTTACCTTTCTGACAAGGTGCACCTCATG
>A03:5M6M:528951	GGCGTTGGGTATTGTGAAGAGAACAGAGGGACATTACTGATCAAGCT
>A03:5M6M:529501	CGATCACAACTTTACTCTTAGGAGTTCCACTTTGACTTCCCTCAGCT
>A03:5M6M:529701	GTTGTTACTGTCGTGATGAAAAACTGTGATCCGTTGGTGTCTTCACC
>A03:5M6M:529901	GCAAACTTCTCACCGTAAATAGATTCACCTCCCATACCATTTCCATC
>A03:5M6M:530901	TAAACAAAGAACACGTCGATATCCAATCGTATTCCGCCAGCTGTAAG
>A03:5M6M:531751	CAAGAGAAATGTTTCATCAGATTTTGCCTGAAACCGACCAAATGTGT
>A03:5M6M:533101	AGAAATATATACCCTGGACTTTTCTTTATCTTTCACTATTTACCCTA
>A03:5M6M:533701	TCAAGAAATCAAAACACTTTTCGACAATTACTCCGAAAACGGCAGGA
>A03:5M6M:533851	CGTTTTCCACCCTCGTGGGCTTCATCTTGAAGAATTCTACCGTTACC
>A03:5M6M:534051	TTTGTTTTTAGGTTTGGCAAGATATGACTCAGCCTTTATCGCATTAC
>A03:5M6M:534151	AAGCAGCACCGAGCCGATTGTGAAGGCTCTGAGAAGAGGAGTTCGTG
>A03:5M6M:534301	ATTGACTTAATCCTTAGAGAAGTCTATAACAGTTTGTTTTGAGTTGA
>A03:5M6M:534801	AAATACAGAAGAACTGATTCAAGATGAAGATGAGAAGACTGTAGCAG
>A03:5M6M:534951	CGAGCAGTGGCTAGAAACTCTGGCTAAAACTCGTGGACCTGATATAG
>A03:5M6M:535051	GACTCATCAAATTATGATCCTCTTGTTGGATGGATTCATGGTGCTCA
>A03:5M6M:535651	TTAAAATTTCAGGTCGGAATCGCAGGAATACCTTTAGACACAATAAG
>A03:5M6M:536701	AGACACAATATAACACTCAGTTGTCGTTTCTTTATAAACACATGACG
>A03:5M6M:536851	TTTGTTGTACTTCGTCTTGCTGTGTTTCTTCTGTTGACGCTTACAGT
>A03:5M6M:537501	CTTCTGATGATACTACCTCAGTAGCTACCTGAGACGATGCTCGGTCT
>A03:5M6M:537851	CAATTCCAATCAAGGGGAAAACACGATCACCTGCAACTATCATACCG
>A03:5M6M:538651	CAAACATACACGAGAACTTATACCTGAGAAGGGAAATCTAGGGTTTC
>A03:5M6M:539451	GATAGTCTATGCGGATATGTTCGTTCCCATACGATTCGTTCCCTTGA
>A03:5M6M:549851	TTTATTGTGTACGTCAAATTGCACGTGGTAGGCAAATATTATTCATT
>A03:5M6M:550051	ATGGGAAGAAGAGTGACTTTTGGTCAGTAAAGTTCTTATAGAGAATC
>A03:5M6M:550401	GGTTCCTCGTGGTTAGGTCCTGAGAACATCGAATATATTATTTTTTA
>A03:5M6M:550501	CTAGAAGTAGTTGCATAGGCATAGCGTTCCTCGTCTTCTACTTTTTG
>A03:5M6M:550601	ATGTGACCTCCATTACCCACTTCTCTTCTTTTAGTATTTCTTGTTCC
>A03:5M6M:551551	CAACTCCAATGTCCTCTTAGCTGCTCTCGTCTTCCTTCTCTTAGTCG
>A03:5M6M:551701	AACCGTCACAACTACAAGAATCATACCTCCAGCCCCACTCGGAGGTT
>A03:5M6M:552001	TCTCTGTAGATCCCCTGTTCTCGCAGCTTCAGATCAAGACAACCTTA
>A03:5M6M:552451	TGAATAAACAAAGCCTTGTAGTAATCTAGTTGATTAAGCTCTGGTTG
>A03:5M6M:552701	CTACTGTTTCACTCATTGTTTGCAAACTGTAAACTATGCTTTATTCT
>A03:5M6M:552851	GATGGAGAAAACGAGTGATGAATTAAGAAAGACGTTAACTTTGTAAT
>A03:5M6M:552951	TCCACATCAGATGAGCTGAGAGGTTGTTTTCAAATGGTCTACTTCTT
>A03:5M6M:553151	AAATAAGAACAGGCAATGATGGATATAGTCAGTGATGAGGTTGCGAA
>A03:5M6M:553451	GCAGTTTAGCAATAAGCCTCTCCTAGGTTGTCCTTCAAGCCCTTCTC
>A03:5M6M:553701	ACCTTCCCCATGCATCTTTCCAAATGAGGAGCAAACCTTCCCGCAAC
>A03:5M6M:553801	GACTCTGACCAAATATATCAACAACGTATTTAGTATTGGTCTCTAGG
>A03:5M6M:555601	GGCTATTGGAGATGTCTTCCAATAGAAGATACATGCCAATGTGACGG
>A03:5M6M:555801	GTAGACACCAAGGCCCAGGAGCAGCATCCTTATAATATTGACTCCAA
>A03:5M6M:556251	CGCTTGCCAATCTCTCCCCAGAAACCGAGTCACGAGAACGCGACAAC
>A03:5M6M:556501	TTTTCTGCAAATCCCAACGACCAAACTTCATCTCATCAAATATTTTA
>A03:5M6M:556551	TAGTTTTTGACAGTTGTTTGCTGAAGCACACAAAATTTGGTGGTTTG
>A03:5M6M:556651	TTTTCCTTTCCTTTCAAAACAGTGTATATGAGGCAATCTAACGATTT
>A03:5M6M:560801	GGGAGAACGCCGAGCATCTGGGATACTTACGTTCACTCTCGTAATCT
>A03:5M6M:561101	AAAATTTGTTTTAATGAACTTGGCAGGTAACTTAGATAATGGAGACA
>A03:5M6M:561451	GAGGTCCTGTTAACCCAAAGGGCCTCCAGTTCTACAAGAACTTCATC
>A03:5M6M:561601	GTAAACTTCTCACAGGAATTGAACCACATGTTACACTCTACCACTAC
>A03:5M6M:561801	GCTTATGTAGACGTTTGCTTCAGAGAGTTTGGGAGTCACGTCAAATT
>A03:5M6M:562151	GTCGGCTTTGGCTTGTTTGCAATAGGGTTTTCTCCTTCTACAACCTC
>A03:5M6M:562401	TATGTAATGAGAAGAACCGTTGGATCAAGACTGCCAGATTTCTCAGA
>A03:5M6M:562651	TTTGGTTTTAACTGCTTGGGATTACAGACCTTTGTAATGATTCATCT
>A03:5M6M:562951	AGGTTTACATTGGTGCTGTGCTCAAAGCCGTTAGGTAAGTAAAGTGT
>A03:5M6M:564351	TTACATTTCCAACATTTCACCGTTCCTAGAATTTGTTATTTATGGAA
>A03:5M6M:566101	TTTCAAATTATCCATCTCTTGGTCCAGGCTTATACCAAGTATGTCTT
>A03:5M6M:566351	TAAACTTATCACAGGAATTGAACCACATGTTACACTGCACCACTACG
>A03:5M6M:561901	GGATAACACCGCCTGGTCGTTGTTCCGGAAACTGCATGTCAGGGAAC
>A03:5M6M:566751	AACTTGCTTCTTGCACACGCCTCTGCTTCAAGATTGTATCGACAAAA
>A03:5M6M:566901	TGCATGGAGGTTCCGTTGCCTTAAGCTTGTATGCAATAGGGTTTTCT
>A03:5M6M:567401	CTTCATTCTACTGCATGGGAGGACAGACACTTGTAATATTACAACTT
>A03:5M6M:567551	CTGTAACTCCATGGGCTTTAGAAGGTGTTCTGGAGTATATAAAGCAG
>A03:5M6M:574001	CTCAAGGGTGACACCACCTTTCTTGGTTCTCAAGGCATCGCACAATT
>A03:5M6M:574451	CAGAGGAGAAAACACATTGAGGCAAAGGTTCAATCTCATGGGTGGTG
>A03:5M6M:568601	TGGTCAGGATTATTTCTGCCACTATCGAGACCACTAAAGTAGATTGA
>A03:5M6M:573951	GCCTCAAGCTTGATACTCATCTCACGAGATCTCCAAAACTCTCTGCT
>A03:5M6M:574601	TGATACCCATGTCTAAGATCAGCGCCTCATCGCCCAGAGAGTCGACT
>A03:5M6M:574851	GGCATACTCAACTGGAGGATAATTATCTTCAGAGACTTGTTGTGGAT
>A03:5M6M:575301	TCTGGTTTTGTAGGTTTTGTCTCTGTCTTCTGGAACGAACAACACGC
>A03:5M6M:569451	AGACAACCTCTCAAAGCAGTGCGCCACGAAGAACAGACTGATCTTCC
>A03:5M6M:568451	AAACTAAGACATGATGAGGAGCCAATTGCACAGTTAGACTAAACGTC
>A03:5M6M:577851	TTGCATGATTGTTCCTCTTTGTTTTCAACAGTTTGAAATTCAGCTCC
>A03:5M6M:582201	TGAAGCTACCACTTTCCATTTCGAATTTTACAAATTGGAATTTTCTG
>A03:5M6M:582351	AGTGAGATGCGGAAACGAACAAGACGAACACCTAACGAGACCGTTCT
>A03:5M6M:582951	ACGTAGGATCAAATTCGCGGCGCAGACTCGGTGGAAGACTCTGGAGA
>A03:5M6M:583051	GAATCGTCGGTGGTGCAGAGGTGGTGGATGTCTTTGAAGGAGGCGGT
>A03:5M6M:583201	TGCAGAGAAAAATGGAGTTTGGGAAGAGAGAGAGAGAGAGAAGGGAC
>A03:5M6M:584401	TAGTTCCTTCCCGAGAGCAAAAACACAACATGTGAAATCAATTATAG
>A03:5M6M:584701	GAGGAATAATCACATGAGGCAGGACCACTAAGCAAAATGATTACTGT
>A03:5M6M:586251	GTGGCACCACCACTTTGACGAAAGCTAAAGATGAAATGTCTTATTCT
>A03:5M6M:586401	GATTTGCTTTGTGACGGGCCTCTCAACCAATCCAAATCTATTTAAGC
>A03:5M6M:587051	ATGCTATGGATATCAGAGAAGTTGGGGCGTTTGGAGGGAGAGTTGTT
>A03:5M6M:587151	CCGGTCTTAGGCCACAAGCCGCTATCCCAACAGCCGCCTGCACAGGC
>A03:5M6M:587451	AAAACTATAAGCATTGCTCATCCAAGTCTCTGTTGTGTTCTCCGGGT
>A03:5M6M:587801	TCCAAGGCGCTTTTGTGAAGATTAGACAGAACCTAATTAGATTTACA
>A03:5M6M:588401	TTGAAGCTTCTTGTTCTTCAACATCAGTTCATGGAGTGACCCGCCTT
>A03:5M6M:588501	TAAAACTGCAGAATGCTCTTGTGTCCACACGTCATCAGCTCCAAGAA
>A03:5M6M:588601	TCTCGATTGCCACCCTTTTCCCTCGGAAGATTCCTTTGAAAGAACTT
>A03:5M6M:588701	AATCTCACTGCCACCTGATTGTATGGTCTGCCACTCATCGACTGATA
>A03:5M6M:588801	TTCTCAACCCCTAGTCTATTACCATGTTGAATGGACTCTTCTTCAAC
>A03:5M6M:589001	GTCCATAAGAAGAACAACACCGAGAGTCAACCCTTTCTTCTCAAAGA
>A03:5M6M:589451	CACAGTAGCTTCCTCCCGCCGCCTACATCAGCTCTAGGCGACGGACC
>A03:5M6M:589551	TTAGCGAGTTCTTAAGCGACGCAATCGCGCCGGAGACGTTGCGGCTG
>A03:5M6M:589701	CGGACCTGTCGTGAGTGCGCATGAGGACCTGATCCACTAGATCGTCG
>A03:5M6M:589951	CAGTACGATTTTTTAGACGGTCTGCTTTCTCGATCTACTACTACGCT
>A03:5M6M:591851	GTCGGATCAGGAAGAAGAACTTGATAAGTAGAATGCAAACCGTTTTT
>A03:5M6M:592001	GGAGCGGATCTCTTCGTCTGTGTGATCGGAGGATCCTTACCCAGAAA
>A03:5M6M:592101	CAGACCTAATCATCTCGAAGAAGATGATGATGCAGAAGAAGAGGTAT
>A03:5M6M:592201	TGCTGTTCGTTTTTGTATTCATGGATCAGGATTTATCTTTTCAGGTG
>A03:5M6M:592551	GGAAGATTCCAAGAATCTGTTTAAGGTTAAAAACGACTTGAGAAGTG
>A03:5M6M:592701	CATTTTTCTGTTTCATGATTCGGTATTTGACTGATGCAGCGGGATTT
>A03:5M6M:592901	GCCAGTGGGGTGCTTCTTGATGCACCAGAGTCTAGCAAGCTTCTGAG
>A03:5M6M:594201	TCACCCCATGAAGCTGAGAAGTGGATTTTACGCCCAATCCTCTCACC
>A03:5M6M:594501	ACCTCATTTTTCAAACACCTGTAGAAATTTCATTTAGGAAGGGATTG
>A03:5M6M:595001	ATCTAATTTCGCAGGATTTAAACTCCCAGATTTTACTAAAGGCGAAC
>A03:5M6M:595101	TTCTGTTTGCACTCACTGTGGTTCGGCAACTGCAATATCCGTGGTAT
>A03:5M6M:595401	TGATCCACCAGAAGTTGCACCTGGTAATCTCTATACATACTTAATTG
>A03:5M6M:595801	GACGACAGAAGAAATGCATCCTCAGAAGATCTGCTGAGGAAACGTGA
>A03:5M6M:596201	ACTCCATGCCCCATTTACCCAAGTTTGTATTTAACTTGACCTCGTCT
>A03:5M6M:596901	GGCCTCCTCAAGGCCGCCTTTCTCAACGGATGTCTGATCAAGGAAAT
>A03:5M6M:597251	TCTACCTCATCATCAGATCTACTTTGGGAGTTCTACAACGTAAGAGT
>A03:5M6M:597351	GCAGGCAACAATGTTCCGGACAGAGAACAGACGGTCAAAGATCTGAG
>A03:5M6M:597451	CTCTTCACAGAAAGTTCCTTGAAGCACCGCGCCTTGCTCAAGTTATA
>A03:5M6M:597751	TGGGAAATCTTCTAAACGGACACGAACCAGTTCTCAGGGAGATCATT
>A03:5M6M:597901	TGTATGTCTCTGGAACGTCTAACGATCTCCGCGTTGCACTCTCTGTT
>A03:5M6M:598051	AAAATGGTAGACTGAAATGCTGATCCTGCATGTCAAATTTTACCATT
>A03:5M6M:598901	TCAAGGAGGCAATCGCGGTGGAAGAGGAGGTGGCGGCGGCAGAGATG
>A03:5M6M:599301	CGGTAGTAATAGTCAACATAGGGATAATAGTTCTTATGGTCAGGGTC
>A03:5M6M:600201	GCTACGTCTAGGTCTATATAGGAAATAAACCACGTTTATAAACATAT
>A03:5M6M:600501	GCGGTGGTGGTAGAGGAGGAGGTGGCTATGGTGGTGGAGATAGAAGA
>A03:5M6M:601301	TGTCTTGATACGGTAGGAGCCAATTGGAAATCTTGTTGAGATCCAAT
>A03:5M6M:601451	CCATGTACCACATTTTGTTTTGGTTAAAGGCTCCATCCACCACTTGG
>A03:5M6M:602051	CTGAGCTTTACAGCTACTTCTCAACTACATCACCTGAAATTTGCATG
>A03:5M6M:602401	CATTCATGGTGGAGAGCTTTAACCAGTGATTAACATATATATTATAG
>A03:5M6M:603351	ACAAAGCTAGGAGGAAAGTTTGAATCTATTCACATTTGCGTTTAATT
>A03:5M6M:603701	CCAAAATGACGCATGTCCACATCTCTTTAAAAAAGAACATCAATCTT
>A03:5M6M:603851	CAACAGCAATGACCAGATTCTCCTGCCAGTCCATCTCGGGTTCTGGC
>A03:5M6M:604001	CAGAGGCGAAAATGCTATGAACTATGCATTTTCGACTTTTTTGCTCG
>A03:5M6M:604251	AAGCAGAAACTTCAACTACTACGTGTTCCCACCTATTTCAAACTACA
>A03:5M6M:604351	GCCAAGACCGATGTTGCATCCGTTGCAAAGTCCCCAAGAAAGCACAA
>A03:5M6M:604551	CACTATTTTAAGAGACATGAACCTCGTCAACTCAGAGGTGGGCAAGT
>A03:5M6M:604701	ATGGTACCTCGTATCGGTAGCGATCTTCAGTGGTTTTATGCTTTTGG
>A03:5M6M:604901	TAGGGTTGGTTGTCCCTCATGGTCCACCTTTGGGCTCCACGTTGGCT
>A03:5M6M:605051	AAGAGCTATCTCCTCTCGTCTACATGGTCATCGTTGGATTCATCACT
>A03:5M6M:605301	TATCAGCTTCCTTTACGATCCAAACCGTCCTTACAGAATCAGCAAGC
>A03:5M6M:605401	GTGTCTGACCATGAAGCCTTGTCTGGCTTAATCACTTTCCTTGACCT
>A03:5M6M:605501	AACTGATGGGTCGAGCTTCACCGGTTTTTATTGAAGAGAAAGACGTT
>A03:5M6M:605701	GATATTTGCGAGTTAGCTTTGGTCAAGAAAACAGCTTTCATTCTCTT
>A03:5M6M:605801	CCGGGATGCTATCAGTGAACGCGGATGTCTTGGCGCACACGCCATGC
>A03:5M6M:606001	GCTCTCCATCTAGCCGACAGGATGACGGTAAACCCGGACATAACCTT
>A03:5M6M:606151	AAAGATAGGGTTAGTTACAAGGAGGTTGTGGTCAAGAACGGTGCGGA
>A03:5M6M:606451	TTAGTGTCTTCTTGGTCGTGTTATAGATGATTTGTTAGAAGGATTTT
>A03:5M6M:606651	TCATCTTAAACTCCAGCCTTTAGAACCTATTGGATTTTACATGAACA
>A03:5M6M:606851	TTGAGTTTCTTCGAGTTCTTCATAAAGTATCTAGCCAAACTCAGTTC
>A03:5M6M:606701	CCAGGCCATGGACTAGGAGTTGGAACCACTGGAAGAACTTCGAACTG
>A03:5M6M:607401	GTAATCACTCATCAGCTCAAACTCGACATCAATATCAACCTTCAAAG
>A03:5M6M:607501	CTCAGATACTCAAGCTTCGGGGCATCGATCACAACCGAACGTCCACG
>A03:5M6M:607851	GGTCCAAACTTATTCTCGACTTGGAACTGGAAACGTTCAAGCTTCCG
>A03:5M6M:607951	TAAAGCCATCGTAGTCAATGGTCAACTTGAACTCACGCAAGTAGTGC
>A03:5M6M:608151	AGGAAGCTGAGTATGTGGCATAACAACGGTTCAGGTAAAAAGCTTAT
>A03:5M6M:608251	TAGACGAGACACCTAACCTGATATACCATTATTACAAAAATCGAAAC
>A03:5M6M:608351	GAGAGGAGCTTACCGCTTTTGGTACTTATAAAATTGCTTCATTGAAG
>A03:5M6M:613401	GTGTGAATCAAATTATTTGTGAGACCAGACCTAAAAGAGTCAGTCAC
>A03:5M6M:613551	GTCGAGTCGGACTCGTAAGGTTGCTTCGAAGATGGCGGCGGCTCTTA
>A03:5M6M:613701	GAAGCTTTGGAGAACGATAATGGAGCTGTGGAGGTGGTTGATTTGAA
>A03:5M6M:614051	TTGCCGTCGCATGTGCCCACTTACTTGAAAGCAGCCGTGGGACCTCC
>A03:5M6M:621201	CCGACGACATCCTCCAGATCTTCTCCACCTTCGACGGCAGATTCTCC
>A03:5M6M:621401	TTCCTCGACGCGATCGACGAGCTCGTGAACCTCACCAGAGAGTGGAG
>A03:5M6M:622101	TCGACGTGTTCGAGACGATGAGGGATTTGATGGTTGAGTTCGAGTCT
>A03:5M6M:622201	GAAGCGGTTGGGGGAGGCGGTTAGAGGTATATTCATGGAGCTTGAGA
>A03:5M6M:622301	CCGATCACTCGGTATGTGATGAACTACCTCCGCGCGGCGTGCAGGTC
>A03:5M6M:622501	TGTGTTTCTGATGAACAACGGGAGATACATTGTTCAGAAAGTGAGAG
>A03:5M6M:622601	AAAGTGAAGCAATACCAGATGAGTTATCAGAGAAGCTCGTGGAATAA
>A03:5M6M:622751	GTTTGTAAGGCTCATTCGACTTGGGTTGTGTTTGACGAGCAGATGAG
>A03:5M6M:623101	TGTTTGTGTTATGTTGTATTGTATTAAAAAGAAGAAATGGTCGAAGC
>A03:5M6M:623551	GATTTCTGGTGGAATGAGCTGTGTAAGGTGTGTCTTTCCTTTCATTT
>A03:5M6M:623801	TAATATGTGTCCCTCTTCATTCTTGTCACGATTATGAGTCTGTGCCT
>A03:5M6M:623901	TTATGATTATAGAGTTTTCAGTTCATTGATTTCAGGGATGGCCTGGA
>A03:5M6M:624101	TATGGCTTTGCGTATGTTCTACTTGGAGTTGTTTCATAAAACAAATA
>A03:5M6M:625951	ATACCAACTGTAGAGCAGGGAGTCTATAGCGAGTTGCTTGTGCTTCA
>A03:5M6M:626251	AGCTGGAGAATCACAAAATCAAGCAGCTTGTTGACCAGCAAGCCTCT
>A03:5M6M:626351	ACCCACGGCTTTGTTCCTTTGCCAAGGGTGAACACATTACCCAACCT
>A03:5M6M:626751	AGAGAGAGGGAGAAAGATCTAAACCTTTGCTTCCTCATCTCTGATGG
>A03:5M6M:627001	ACAAGAGGAAGGCACTCTCTAGACTTGTGTGGTCCAGAAGATGGCTT
>A03:5M6M:628101	GCTTTGTGAAACTTGTATTTGCATGTCACGCAAGCCCGCCTTGGCAG
>A03:5M6M:628751	TGCACCACGTTCTTGTAAATGCTTCAATCAAAGATGACGCAGATCGA
>A03:5M6M:628851	CAGACCATATATAGCCCCAGCAAGCGAGGCCATGTTTCCGGTTTCAA
>A03:5M6M:628951	GTTGCTGCAGATGCTACCACAGATAATTCAGATGGAATATCTCCATC
>A03:5M6M:629301	TAATTTAACTTCTCAACCATACAAGATATTTCATCTCTTAGCTGCAG
>A03:5M6M:629401	CATCACTGGGTGACACATTCCCATCAGCAACTATGGCCAGCCTGGAT
>A03:5M6M:629701	TAGCCTCAGCAGACCGGTGCAGAAGAAAAGACGGAGAACACCTTCAA
>A03:5M6M:629951	CTAATGAAGTCATTGACGTTCTCAGAAGCTTCCTCCATCACAACTAC
>A03:5M6M:630151	AATTTGCCTTTGCTTGCGAAACAAGTCAAGCAGGAGTGTTCTCTCTT
>A03:5M6M:630251	GGATAACAAGATAATACAAGCTGAAACCAATCCTGCATATCTGATAA
>A03:5M6M:630601	TCACCTTCCCCACGTTGCCAGAGGACTAGAGGAGGAAACGACAAAGA
>A03:5M6M:630751	ATAATGAAAGGAATGATTCTCAAACAGTTTTTGCTCGGCTCTTCCCC
>A03:5M6M:630951	GTTCCCGGAGCTGTCTATCTCATCCTCTCCATGCACAAGAGCACCAT
>A03:5M6M:631051	TTACAAAATGAGACAAGTGCTGGCAGGAAAGACGTTTGAACACTACC
>A03:5M6M:631151	ATAATCCATTATCTTTGTGGCCAACAACAAATCGGTGAATCCCCATT
>A03:5M6M:631351	GCACAGATATCTTCTTCATCAGTTTGATCCAATGAAAGATATTCCAA
>A03:5M6M:631551	CTTAGAGCAAACAGCATGAACAAAACCACACACTATATTCCGATCCT
>A03:5M6M:632001	AAGTACTGAGAGCAAGCAAACAAGCAGTCTTAAGACTCGGCTGAGAA
>A03:5M6M:632151	AACTGAGTAGCAGAGGTTGTAGTCACCGGGGAGGAACGTACAAGACT
>A03:5M6M:632301	GCCTTCTCTAAAAGCAATTCCATAGAAGCCAGCTTATCGAACCCGTG
>A03:5M6M:632501	GAAAACTTTAATAAACTTTTCTGGGCTCATATCCCTCCCTTCTTCAA
>A03:5M6M:632751	AGATGATTTTATCCATGGAAAAGCCTTGGACAGCAGTGGCCCCATAA
>A03:5M6M:632901	TCCCTGCTGAAGCATATTCAAGAAGCTCTCCTGAACAGATTTAAGGA
>A03:5M6M:633051	AGTTTCAGATGGCTTCCTCTGAATATGTGGAGTACTGTCCTTAGATA
>A03:5M6M:633151	ACTTGGAGATCGTGAATGCTGGGACCATCGCAATACCTTGAAGCATT
>A03:5M6M:633251	CTGCGCTTGAAGAATCACACATACTCCTCCCAGCTAGTAAGTTATTG
>A03:5M6M:633501	CCACATTGATGAGTGGCAAATTGGACTAGTTTCTCGAAAAACACCAA
>A03:5M6M:633701	TTCCAGCTGAGGAGGTTGCTACTCTCCTAGCCTTCGAGGCAAGTTTT
>A03:5M6M:633801	ATCTAGAAGTGTAGCCAACGCCCTCAGAGATGAAGACATCATCTGAA
>A03:5M6M:633901	CCTTAAAGTACAGATTCCCCCAGATGAAGTACCTGCTGGTACATTTC
>A03:5M6M:634101	GCAGCTAAATGAAAATCTGAAAACGGATTCTATAAAAAAAGTGCAAG
>A03:5M6M:634701	GCATTAGAAAGCTGAGAACGAAAGTACAAACCCGACACCAGTGACAA
>A03:5M6M:634901	CTGCAAAGCACTAGTACGTTGACAAAGAAACATACCCATTGTGGGAT
>A03:5M6M:635101	GGGTCTTTTCTTGAGAGACGTTGCAAGTGTTGGGCCATCTCACTATC
>A03:5M6M:635201	GAGGCACAAACATACCAAGAAGGGAGCAGAGTCTTCGTTTGACATAG
>A03:5M6M:635401	TAAGGCGTGGGAGAGATTGGAGGATGATTTAACCTGCTGCTTGAAGG
>A03:5M6M:635551	AATTAGATGGAAGTTAAAGGATCGGAGGGAGAAGGCGGTGGCGGTAC
>A03:5M6M:642601_(reversed)	AAATGTAAGCAAGAAAAAAGGGAAAGGAATTAAAGCATGAATTTGGT
>A03:5M6M:642301_(reversed)	CTTATAATAATGTGGAGCTGTTGTTACAGCCACGCCCAGCTGAGCAG
>A03:5M6M:643401	TCTATGCGGTGAGACGCGAGGTGCAGCGGGCGGTGACCAGGGAGCGC
>A03:5M6M:643601	GGGGTGTGACGGATCAATATTGTTGGACGACACTTCCTCATCTATGG
>A03:5M6M:641951_(reversed)	TAACTCCGTGAGGGGGTTTGACGTTGTTGACAAAATCAAGTCGAGGG
>A03:5M6M:644351	CCACCACAGCGAGTTTCACGACCGCCAATTCAGGCGTTATCCCTCCT
>A03:5M6M:641151_(reversed)	TATTGGACAAGCTAGATGCGTCACTTTTAGAGACCGTATCTACAACG
>A03:5M6M:644551	CTTTCTTTCGCCTTGTCTAGACAAAGGAGCTGTTCGGCTGCCTCTGG
>A03:5M6M:641001_(reversed)	TCCTGGAAGGTTTGACCTCAACTACTACAGACAGCTTCTCAACCACA
>A03:5M6M:644701	GACCAAGTTCTTTACAGCGGCGGTTCAACTGACTCGCTTGTCGTGTC
>A03:5M6M:640851_(reversed)	AAGGGGTATGGTTAAGATGGGCGATATCAAACCCCTTACTGGATCCA
>A03:5M6M:640651_(reversed)	TTGTGGCTATGCAGTTTTCATTTATGTTTCCGTCTCCTCTCAGTTGT
>A03:5M6M:638851_(reversed)	TAAGAGGAAAAAGAAGAGACCTTTGAGAATCTGGAGTCAGAGTCGGA
>A03:5M6M:646851	ATCAGCGTCGTCGGTGAGAGGGTCGGCGAGAGGATCGTCGTAGGAAT
>A03:5M6M:638601_(reversed)	TTGACAAGAAAGAAGAGAGAGAGAGAGGTGAGGAGGGAAAGAAAGAA
>A03:5M6M:637601_(reversed)	CGGTTGTCTGATGTCAATCTCCAGTTACTCGAACTGGAAGCTGCACA
>A03:5M6M:637251_(reversed)	AGTATCATTCATGATGTCAAAGGGAAAAGAAACCCTCTTTGCCTTAC
>A03:5M6M:637101_(reversed)	CAGAAACATTGTGTTATCTTCAGCGTTCAGCTTCCCAGTGATGGTCA
>A03:5M6M:648651	GTTCAAGAAAGGCTTCAGATTCGCAGCACCTCTCGCGTACACCATCC
>A03:5M6M:636901_(reversed)	CTCTCTTAGACGCAGGCACGAGGCATTTCCCGATGAACCTCTGTGCC
>A03:5M6M:636751_(reversed)	TCACAGATCGAAAGACATACCGCAACAACTTTCTTGTAAATCTGCGC
>A03:5M6M:649601	ATCAACAGAGGAACGGAGAACCTCTTTTAGCTGCACCTGGCTCCACG
>A03:5M6M:650401	TCCTTTAGCTCTCAAGGAGTTCATGGTTCTGTAATAAACTAGCAACA
>A03:5M6M:652501	CGCCTTTCCTCCCCTCTTCATCTCAGCTTCGCCTCTCCTCCAAGCTG
>A03:5M6M:652651	TACGCTCTTCACTCTATTAAAGTTTCAACCTTTATCTGATCACATGC
>A03:5M6M:653351	GCCCTCGAAGGTGTTGCAATGGAACTGGAGGATTCCTTGTTCCCTTT
>A03:5M6M:654651	TTAAGACATGAAAACATTGCAGTCTGAAGCGGAGCTGTTGGCTGAGA
>A03:5M6M:655001	GCAATGGACCGGACTCATGTTATACAATAGTGTCTGTAAACACTTGT
>A03:5M6M:655551	CTCTTCAAGATAACGCACAAGAGCTTCCAGCTCCTTGAACTGCTCAT
>A03:5M6M:655751	TATCAAGCACCTTCACCACCTCTCTTCTATCTGCACTAGACTTGCTT
>A03:5M6M:655901	TAAGCCTCAGGCTTGTAACTCTCAGCTCTTCAGACAAAGTCTCAACG
>A03:5M6M:656001	TGGCAAGTATCTAGCGAGGTGACTCTTTAACATAAAGATTTGGTCCT
>A03:5M6M:656451	GAGGGTGAGAAGCTCAGGCCTCTTTTGGTAATACATCTCTGCCTTCT
>A03:5M6M:656651	CGAGATTATTCTCGAGCCACTTGGAGTTTTTGAGGCCTACATGGCTA
>A03:5M6M:657151	ACAACAGATATTGCGGAACTAGTACTTAGCAATCTCAACGTGGCCAA
>A03:5M6M:659801	AAACTCTTATCTCCTCAATCATCCTAACCACCTCATCCATGCTAGGT
>A03:5M6M:659901	CATTTCTTCTTCAATATTCTGAAACTTCATAAGCTCAACATCAAACA
>A03:5M6M:660201	ATCATTCTCCTGTTTCATAATCACGTTTGATGACTTTATGTTTCCAT
>A03:5M6M:660401	AATCCAAACCATTAACCCAAGATGGGAAGAAGACTAACCGTGGAGGA
>A03:5M6M:660501	TTGGAGTAATAGTATGCACGAAGGGGAACAACGCTAGGGTGTTGCCC
>A03:5M6M:660601	CTTCCTTCAACCTTTTCACCACAACAGTAGTGGATTCCTCCAAGACA
>A03:5M6M:660751	GCTTGTTCTTCTCAGGCTCTTGTACTCCACTTCCAAAATCTTGCTTT
>A03:5M6M:660901	CAGCCCCACAAGCTGCAATGATAATGATAGTGCTTTCATGTAACTTA
>A03:5M6M:661151	AGGTATTGGTCCAGATAGTTTGTTGTTCTGGAGGCTCAACGCTGTCA
>A03:5M6M:661401	GTGGTGAGTGATTCTAGTTTACCAAGTGTGTTTGGAGGGATTTGTCC
>A03:5M6M:661701	AAGGTGAAGACTAGACCAACATCAAACTGGAAATGGAGCTGCATCAT
>A03:5M6M:661801	ATGACGACAGTGATTTTCACCACACAAGCCAATATTGCAACACTTAG
>A03:5M6M:663151	GTCGCTAAGTAAATAAAGATGAGTTTGAGTGTCTTAATTTTAGCAGA
>A03:5M6M:663251	AGTCTTGAAACTTTCCTACCCAACCAGCTGGAGAAAATGATGCTATG
>A03:5M6M:663451	CGTGAACAGTCTATAACTCAAATCTTGAAATGATGAAAGAGAAGAAA
>A03:5M6M:663901	TGTAAAATTAAACTAGTCATCTCATCATCTACCAAATCCCAAAACAA
>A03:5M6M:664101	CAATCTCAAGTTAACTTGTAGAGATGCAACTTGGTTCATTTAATCAA
>A03:5M6M:664301	GCGTTAACAACACGCATAATCTGGTTCCCATCTCAGCTTTCTCCTCA
>A03:5M6M:665601	GTACCGGGAGGTCCATAAAGCAAGACACCTCGTGGAGGGTCAATACC
>A03:5M6M:666151	TGGATTCGTTTGACCTCTTCTTGAGCGCGCAAGAGCTCGCGTTTGAG
>A03:5M6M:667551	AAATATCAATTATACACTCTTTTTTGCCTCTGGAATTCACTCTTCCA
>A03:5M6M:667651	TGCGCGTATCTTCCTGCCTTCCCCAACAGCACCTCGTGTGGACCCTG
>A03:5M6M:668051	CTTGAGCCCTCTTTCTCCAACAATGGTGGAATATTTATCAGGGAAAT
>A03:5M6M:668701	CTAGTACCAACAATTGCCACACTCTTTCCTGCCGGTACGACAAATGA
>A03:5M6M:668801	AATGATTATGTGGCAATAGACATGAGTATTCAAGCACAACATGAAGC
>A03:5M6M:668951	GAACAAGAGGCTTTGCGTCATCTATATTTCTGATGTCAGATTTTTCC
>A03:5M6M:669151	ACATAGATTTCATGTCTATAAGGCTCTGAATGGTTTCACGGTAAACG
>A03:5M6M:669301	CGTCGAAAAAATGCAGAAGGAACTTAACAGAAACATAAAGTGTCAGT
>A03:5M6M:669451	TAAATATGATACTTTGCCCAAAGTTTAAGAAAGCAAGACTTCTTTGA
>A03:5M6M:669751	GCCAGTACAGTTACTTACTTTTCAGGAACTGGTCATACTTTTCAGCC
>A03:5M6M:669951	GCTTTGTTCATAGCCTTTCTAAACTTGGTCCGCCACTGGAAAAAAAT
>A03:5M6M:670151	AGGTGAAAGCTATATATGCACCAACAGAAAGAGAAGTAATCCAGGCG
>A03:5M6M:670251	GATATATATTAATTACGTCGAATGTTTTTAGAGAGACAAAGGAGTAG
>A03:5M6M:670851	CCCCGTCCTAGCAATGCCGTACCCAATAAGTACAGCAGAAGGAGTAG
>A03:5M6M:670951	CCACTTCCAGTTTCCGAACCGAGCCAATCAACAGCCAGTTTGAAGAG
>A03:5M6M:672101	CATTAAGGTCTATCACCTTGTCGTGTGTGTCATCATTTCTCCACCAT
>A03:5M6M:672351	GCGTGAGGTGCAGCCTCGTTGACTTCATCGGAGGAGACCTGGTGAAG
>A03:5M6M:672501	AAGAACAAGGATACTACTTTCTTGACATCTCTGCTCGAGGACTTGGT
>A03:5M6M:672651	TCTTCTCTTCTTGTAGGCTCACCTTGGGAAACAACCTATAGCAAGGT
>A03:5M6M:673001	CATTAACTCATTCCCCCTTGCAGGAGAAAGTTCATGTGGAAGCCCCT
>A03:5M6M:673451	TGCTTTGGGCAAGAAGGTGTCCCACCATCCAGGTTCATACTTTGGGT
>A03:5M6M:673801	TCTTGCTCCTTGTCACGCTCTCCGTAGTATCTCAAACGTTCAAACAG
>A03:5M6M:674801	TTGCCATATCTGGAGTATGTTGTCCTCAGCTACACTGGAAATAACCC
>A03:5M6M:675051	CTAAGGTCCCAAACCATAAGCCTTCTACCAAGGCAACATGAGGCTAA
>A03:5M6M:675251	CAAACGTGTGAAGAGCGCTGGTTAGCTTCCGCAGATCGAATAATTTA
>A03:5M6M:675351	GGCTAAACAGTTAACCTGAAGCATTTCAAAACAAAACAAAGATATGA
>A03:5M6M:676201	TCGAGGGGAAGCTGAACCTGAGCTATCATGAGGTAATTGGGTTCGTT
>A03:5M6M:676301	GAGGCTCGTCGCGGTCGGGGAGCCATTCGACGGTGAGGGAAGGCCAC
>A03:5M6M:677101	CTCCTTGATGATATCTAGTTTATCTACCCTTTCCTCCAAAAGTTGGC
>A03:5M6M:677201	TTTTGACCTCACCATCCCCTTCCTCTGGAACTTGTCTGCAAAAAGAA
>A03:5M6M:679901	TTGGAAGCCGTAGGAGATGAGCGTTTCTGCGCGTAGCAGACACTGCA
>A03:5M6M:681001	TTCAAGTCTTCTTTCTCCCCCTCCTTTCCATCTTCTACTGTGACAGC
>A03:5M6M:681201	AATCCCCTGACGTAGCTTCACCTGTTACAACATTTCATCAAATCAAT
>A03:5M6M:681301	TTCCGACATAAGTAAATGCGCACCTCCTGAGAGTCTCGGCTGTGTGT
>A03:5M6M:681451	CCTTGCTGCCAGTAAGCAGCATCCTTTTCAAAATCTACAGGTCCAAC
>A03:5M6M:682051	CAGTAGAGCTTGGACTCTGGTAAGATCCTACAGGATAATATCCTCCC
>A03:5M6M:682501	TGAAGCATCATGGTCGTATGGCCCAAGTATACCCATCGCTTGAGGAT
>A03:5M6M:683451	CTCTTTTTAAAAAGACTTCTTTGCATCACTGTCGCGGGGCCCAGTAT
>A03:5M6M:686251	TGGCGCATGTTTAGGCGTTAGTTTAGGGACTAATGAGATGAATGATT
>A03:5M6M:686601	TACAGCCAAACTCACTCTGAACTCTCCCCCAAAAACCTTTTCAACCC
>A03:5M6M:686901	ACACTGACGCCTCTCATCTCTCTAACTTCTTCAACCAAATGAGTTCT
>A03:5M6M:687001	CTGCGACAGACAAAAACAGAACGTCCTCCACTTCTCAGCTTCCGGGT
>A03:5M6M:687201	CCGACCCTCTCCCCAGCAACATCGGCAACTTCGTCTCGCTCCAGACC
>A03:5M6M:687651	TACTTAACGGTTTGAGTTCAGCTCATAAGCTGGGACACCTCAACCTC
>A03:5M6M:688101	AGAGCGTGAGCAAGAAGAAGACAGGGCTTAAGATTGGTTTGACTTTA
>A03:5M6M:688201	GAGAGGTAGAAGAAAATCAAGAACATGGGCGACAAAGCAAGCTGCGG
>A03:5M6M:688301	ATTGACAAGCCGTTGATGAAGATGACGCTTGCTGACCTTAAGGCTGC
>A03:5M6M:688401	CTTATGAAGCAGTCTTACCCGGTGGATTCAGAGCAGCTTTGAAAGTT
>A03:5M6M:688501	CCTTGCTCGGATCAATCACCCGAATCTTGTCCCGCTCTCTGGATACT
>A03:5M6M:688651	CCGGCATAAGATAGCATTGGGGACGGCGAGGGCGTTGGCTTTCCTCC
>A03:5M6M:688851	AGCTGGAGGAACATGGCTCTCCTACATTAGAATCAGATGTGTACAGC
>A03:5M6M:688951	GGTGAATTGGGTGAGAGGGTTGGTGAGGCAAGGAGAAGGATCTAGTG
>A03:5M6M:689051	GTGAAGATAGGCTACTTGTGCACGGCTGATCTATCATGGAAGCGACC
>A03:5M6M:690201	GTATTCTTCAGTCCCAACGAAAGAGTTTGACTTGGTGATTGGTTCTG
>A03:5M6M:690401	AAATGGAGTTGAACCTGGGGTGTGCAGGACGTCATGAATGAGAGATC
>A03:5M6M:690851	AAAAACTTCATGGGTTGTCTATCAAGCAATGCAAACAACTCTCCACC
>A03:5M6M:690951	AAAACGCTTTAGCAATGAGACGCAAGAACTGAACTGATACAAACAAA
>A03:5M6M:691351	ACCTGCCAGTATCACCAGACCCCAAAGGTTTTACTGGCTTGAAATGA
>A03:5M6M:691551	CATGGGATAGACAGGCTTTGAGTGTGCAGCCCATAGGTCTTCCGGCG
>A03:5M6M:691651	AGTAATCATGAATTAGTATACCTTACCATATTAGCATCTGGAAGTTC
>A03:5M6M:692351	TGTCTGATGCAAATATCTGCATAGGAATCAGTTTGCATTATCATTTC
>A03:5M6M:692501	TTCTCTATGCGCTCAAGAGTGGTGGCAAGATCAATCCCTTGGCGTAT
>A03:5M6M:692851	GTTTTGGCTGACTTTGAAGCCTCGTCTGATTGTATAGCTTGTCTACC
>A03:5M6M:693851	CTCCGGCTTAACAGCTGATAATCCCCACTCAGCAGTTCTCTCAGTTA
>A03:5M6M:694401	TTGGCCTCTCCATATCGTTTCTTTAGAGTAATGAATTGGCTGCCAAA
>A03:5M6M:694751	TAATGCGGAAGCCTGGGAGGATAGATATCGCTGTCTTTATGCAAAAA
>A03:5M6M:695101	CTTGTCTGTTTCAAAATAATGCTGAAGAAATTAATAAACGGGGGACC
>A03:5M6M:695951	TCCAGCCTAATCTGCTGCTTCAGTTGCTGGGAAAGCTCTTTGTCATC
>A03:5M6M:696401	AGAGAATAAATACAAAGATGAGAAAACTCACATCTCCAACACATCTG
>A03:5M6M:696551	ATACTTTTGCCATAGAAAGCACAAAAGAACACTGAAAGAAGAAACCT
>A03:5M6M:696801	AGGAGCTGCGTCTGATGTGGCTTCTCTCACCCAATACCTATACGATC
>A03:5M6M:697601	TGTCAACCTCTCCTCCCACGGAAATCTCCTTTGTTAAATAGAACCCA
>A03:5M6M:697751	GTGAAAGGTCTAGACTTGGAGAGGTACATGGGCCGTTGGTACGAGAT
>A03:5M6M:697851	CCTACACCCTTAACCCCGACGGCACCGTCAAAGTCTTGAACGAGACG
>A03:5M6M:697951	TAAGAGCGATGAGGCCAAGTTCAAAGTCAGGTTCTACGTTCCTCCTT
>A03:5M6M:699051	CTAGATAAACAAGAAAACAGTTAAAAGCGAAAGGAGGGGGTAAAGTG
>A03:5M6M:699201	CGCTTCTTTTCCGTTTTGTCAAAACATAACGACGAGGAAAACAAGCG
>A03:5M6M:699851	AAGCGCCTCCGCGAACGCCTTCGCTATTAGCACCAGCTCCCCTGGCC
>A03:5M6M:701201	AACGTGCAGTACGACTCCTTCTACGTGGAACACAAGCTGAGTGCAGC
>A03:5M6M:701401	CAAGAAGTACAGCGAGCTTCTTCTGGACCTTGCAGCCATCAAGGCCT
>A03:5M6M:701601	ACTACAGCTATGATCCCTCCGCTGAGTATCTTCAGTTTGTGGACAAT
>A03:5M6M:702051	GGCTGCACTGATCTTGCTTATCAAAAGGCGGTCGACGATGGAGCAGA
>A03:5M6M:702251	TGATCTCACTTGGGCAGAGATCCAGTCTCTAAAACGTAAGTAACTGA
>A03:5M6M:702451	CAGCAAAGAAAAGGCTGTCACTGGAGTTCTTATCAACATAGAGGCAA
>A03:5M6M:702701	CAATCACCAAGTCCACACTCGACAAGCAACTAACCCAAAAAGTGTTG
>A03:5M6M:703501	AGAAGCTCCTGGTCATTCAGGCACCATTGCCACCACTGCTGATCTTG
>A03:5M6M:704501	CCTTCTCGCTTCCATCTTTGGTCTCCGCAAGGTCATGGCCACTTTTC
>A03:5M6M:704651	ATCCCTTGGCAGTGATATCATCATCTCTCTCTTTGTGGCTTCCCCAA
>A03:5M6M:704901	AGATATATTATAGGTAAGATTGGCAACGGAACAAAAAAGTTTGCAAG
>A03:5M6M:705251	TGATAGGAAGAACTTTCTTCACCAGGGTGTTCCTTTCTCTTCGTCTG
>A03:5M6M:705401	TGCCTCTCTCGTCCTCGTGCTGATAAACCATCCTCGTGAGTTAGTTT
>A03:5M6M:705551	CTGATTTTATGTTGGACGTCTCTCTTTTGATAGTCCAACCTATCACC
>A03:5M6M:705851	CAGACTCCCCCATCAACATCTCGCTCTTTCCTTTTATCAAAATCCTT
>A03:5M6M:705901	ACTTTCACCTTTGCTCCCCGCTCGAGTTCTTTCCATTTCTTTCCCTA
>A03:5M6M:706051	CGCGCTATCCTTCAGTTGCTGATGATCTCTGTGACTTCCAGATCTTG
>A03:5M6M:706151	TCAACCGCTGACCGAGGGACTGCAGAACTCATTTTCTGCTCCTCCTC
>A03:5M6M:706351	CGAATCCTCACATACAATCTGGCAACAAAATCAATATCAGTTAGTAG
>A03:5M6M:706451	ATTTGAATCGTATTCAACCTCAATGATAGCTTCTAGGTCACGCATTC
>A03:5M6M:706801	TGGATCATAACTCTATCGTACAGGAGAATGATTAGGAATGCAATGTC
>A03:5M6M:706951	TAGTAGTCTCTATACGGTGTTGATCCTGTAAGAATTAAAAGATGTTC
>A03:5M6M:707151	CAAAAGCGTCTACGTCGAACTCAAATATAGTCCTAGATATACGCAAA
>A03:5M6M:707301	ATAAAAGAAATTACTTGTGAGAAGGAAGAGTAAAGTCCAGTCCCCGC
>A03:5M6M:708401	CCAATTGCGTCGTGAGAGGGAGTGGTGGATGGTTTGGAGGCGGTGGT
>A03:5M6M:708751	TCAAACCAAAGACAAAACCGGCTGTAATAAAACAGATTCTTTCGCCG
>A03:5M6M:708851	AGAAGAAGATGATCGGAGTAGGGAAAATGAAGCAGTACTCTAATGTC
>A03:5M6M:710351	ATTGAGCTGCAAAGCCTTGTCCGTTGATTGATGTAAACTACATACGT
>A03:5M6M:710651	ATCAGACTTCTCCTTGGAGAAAGTAAAGAGAGAAGCATAGGCTTCCT
>A03:5M6M:711451	AACGGTTTCTTTGACTCCATGTCAATGCTTTCCTCTCTTCCTCCTCC
>A03:5M6M:711751	GACCACCACGAGCCCACCTGTGGCCCGCCAAAAGCCGAGGGTGCGAG
>A03:5M6M:711901	TTTGTGGCAGTTGAGAAGGGAACGAATTGCAGAGAGGATGAAGTCTC
>A03:5M6M:712051	GACGGATAAGGCATCAATGCTGGACGAGATCATTGAGTATGTTAGAT
>A03:5M6M:712401	GGATCAGCAATGCAGTATCTTCAAGGGAAGGGGCTTTGTCTAATGCC
>A03:5M6M:712551	GTAGCAGCTGCACCTGAAGCCTCCTCCCCTATGGATGATGTCTCTGC
>A03:5M6M:713701	TTAACGAACTCGGTTCTGGAAAGGCTGCACTCTTTAGGGTAGAGAAG
>A03:5M6M:714851	AATCTCAGTGGGTTTCTTACCAGATTCCTTCTCCAGACAAGTGTAAA
>A03:5M6M:713901	CTGACCTTGTAGCAAGCATCTCTAGATTTCTGAAGAACGTCCTCGTG
>A03:5M6M:715051	GTTTGACGAAGCATAAGCATCGAGCACCATGTTTTAGCAAGCGACGG
>A03:5M6M:715801	GTTCTCCTCTGGCTGCTTCTTCCACAGGTAATTAGCTGCGTCTATCC
>A03:5M6M:715901	GTTCCCACATCCATTGCCACCACGTGTGTTACAGATTCATCCACTTC
>A03:5M6M:716001	CAGCCTGGGACTTGGTCGGGAACACTCGACTGAACACCACTTTACAC
>A03:5M6M:716201	AAAGAACAGACTATGCGTTTGCTTAAGGACTTTAAGAACTGTGGCAA
>A03:5M6M:716301	CTGTGGTCAAACTGTTTGCAGCTTGACGCAAAAAAATGATACCTCTC
>A03:5M6M:716501	GAATCAGAACAGCTTTTTCTTGTCCTAGCACCACATCTAAGCTTTTC
>A03:5M6M:716601	TCCCTTTGGGTCCAGCAGCTTCGCCATCTGTCGTGCATATGGCCTAT
>A03:5M6M:717001	GCAACATTTTCATATCTATATCACGCATCCGGGTTACTTCATCTTCA
>A03:5M6M:717151	GCATACCTTGTGTATGTAAGTGAATGAAATACCAGTTTCTTCTTCTT
>A03:5M6M:717251	CATGGTAACTTGCTTGAGGATGCTTCTGCAAACAAAATAGCAATTTC
>A03:5M6M:717401	TCAATCTCATCTTCATCCACGGTTTCTAGATGCTCCAGTTTTCGTCT
>A03:5M6M:717601	AAGAATCTGAGTTAGAGTCCAACTCGGTTTCAAGGAAGGCAGCAAGA
>A03:5M6M:718101	GCGCGGTATAGACCACCGTAACAGAAACAGAAGCTCGTGTCCTTTGT
>A03:5M6M:718401	TTTCGTCCTCTTCAGCTTCAGCCGTTTTTAGAAAGATCGAGTTTCAC
>A03:5M6M:718701	AACTGATTTGTGGATGTGTGTAGGGTGCGGGTTTGGAGAATCTTGGA
>A03:5M6M:719501	GTGCGAAAGATGCAAGCAGAAAGTTAAGGCTACAAAAGAGCTGACTG
>A03:5M6M:720151	TGATCAAGTGAGTGGTTCAACAGTCATGAAAGCATCTTGTTTTAACG
>A03:5M6M:720401	GATTCAAATTCCAAAGAGAACCTTCAGAAGGAACTGCCACTATCACA
>A03:5M6M:720951	AACAACCACCGTTGAGGAGTTCTGACTTATCTAAAGCAAGCCAAATC
>A03:5M6M:721351	AGTCTTATAACTAATGCAGTTGCCAAATGGGATGAAGAAGTCTCAGC
>A03:5M6M:721751	GCAGAAAGTAATGTTAACAACAGAGGAAAAGAGAGAGGCTATACACA
>A03:5M6M:722251	CTTCAAGGTACGTCGCACGGTGTTGCAGATGCTGAAGGACAGAGGCT
>A03:5M6M:722701	TAACATCACCGAGCATAAACTTATTAACAAGTACTATGTACTTGACA
>A03:5M6M:722801	CCACGTATCCTTGTCTCTGATCCTGTTGCTAGATACTATGGACTCAA
>A03:5M6M:723401	AGTTGCAATGGATCTTTGTGCTTGGTTGATCAGAACATGATCACTTC
>A03:5M6M:723601	CTATCTTTGTGTGACCATCTTTGTATCCTCTTATAGGTTCTGATCTG
>A03:5M6M:723801	CTTACAGAGAGAGTCTCCAATTTTGAATCTTGTCCTCTCTGACCATT
>A03:5M6M:723901	CCCACTAGAATCTCCCTGCCTTCACACAACAAAGACAATAACAGAAA
>A03:5M6M:724501	TCATCGGTCTCTTTTTCAATGGACCCAGAGTTTGAATGGTTTATATT
>A03:5M6M:724701	ACCACCAAATAAGTGCACAAGTCTGCTTCCATCTTAATCACTGCTGT
>A03:5M6M:725851	TTCACTTCCTGACTTAAACCACACGGGAAATGAAACCAAAACAAGTC
>A03:5M6M:726101	GAATAAGCATCATCGAGATGCAGCAGCAGAAAGAGATGAAGCTGTCT
>A03:5M6M:727351	AACTCAGGAGTTTAAATAATATAACCTAATATGAAATCTACAGCCTG
>A03:5M6M:727851	CTATTCCATCCATCATGCAACAGAAAAGTCGGTGGGCTGTGCAATGT
>A03:5M6M:728251	TCCTCAAAGTCAGAGCCACGACTGCATCATTCTCAACCTGAACAACA
>A03:5M6M:728451	AGGGTACAGAGTCTTTGTTTAACATCCAAAACAGTCTCTGTGGGATC
>A03:5M6M:731301	CACAACTGATCCAGCAGCTATGGTTCTTCCGTTGGATGATCACATGG
>A03:5M6M:731751	CATCCTCCATCCCCATCAAGCCTCCAGAGTTTGCTACTGTGAAAAGC
>A03:5M6M:734551	TGGAAGCTGAGGCCAAATGAGCATATGCGGGTATTTGGGTGGATAAC
>A03:5M6M:731901	ACATGAATGTGGCGTTTGTTGTTAACGGTGGTAAGGAGCTTGTGATG
>A03:5M6M:734701	GTACACCAAGAGAACGATTACACTCGCTGAACAGCTTGTAAGCAAGG
>A03:5M6M:732101	AGCGGTGTTCTCGTCAAACCTGTGATTCAGTGGGATGATGAAGTTAT
>A03:5M6M:732701	GTGAAGCCAGCTGAGGAAACACCTATACACAGTCTATGGCTTTCCAA
>A03:5M6M:732951	ATTTTTTTTCTGCTTTATATGTGGTAGATAAGAATGGGAGGTTGGAG
>A03:5M6M:733301	TTTTTTTTGCAAAGGTTACATATTTCAAATGTGGAGCCATCTGTATT
>A03:5M6M:733501	CCACACACTGAATACCAACCACCTCCTTTTTACAATCCTCCCGTGAC
>A03:5M6M:733851	TTCAAGAGAAGAACACTTGACGAGGTTGCATATAATACTTGATGGGA
>A03:5M6M:736651	ACAACGAGTACTTGAGATCAGCTATTGACTCCTTAGAGACACATCCT
>A03:5M6M:734101	TTGGTTCCTGGTGAAGGTAATCCGATCTTCAGCTGTGCAGCAAACTT
>A03:5M6M:734201	GGGGTAAGCCTTTCTTCAAGAGAACTTCACATTTGAATGAAGGGAAA
>A03:5M6M:736901	CATGTGCTTAAAGAAGACTCAGCTTGGTAAGTTTCAGAAGCTCTTCT
>A03:5M6M:737001	TGTGTTTGTGTGTTTAAAGAAGGAAGCTTTCTTGTGTTCATGTGTTT
>A03:5M6M:735401	CGTGGATCAAATGAAGATTCATGTGAAGCAAGCTACGATCGTGAAGC
>A03:5M6M:732851	AGGAAGGTTCTTGTCCTCTTCTACCCTGCCGCTGGGAGGCTACAAAA
>A03:5M6M:735701	TATATATGTGGTAGATAAGAATGGGAGGCTGGAGGTTCTATGCAATG
>A03:5M6M:736001	AGCCATCTGTATTGGAAACTCAATACACCATACGTTCGGAGACGCTG
>A03:5M6M:736201	ACCCTCCCGTGGAATCCCTGGCTTACAGATCAAATCCTGACTCTGAT
>A03:5M6M:736351	CTCATATCTGGCGTTGTGCTTGCTTTGCAAACGAAGGTAATGAACTT
>A03:5M6M:736501	ATGGGAGGTCAAGACTACAACCGAAGCTTCCACAAGGATACATTGGG
>A03:5M6M:736601	GCCTTTCAGCACAACAGTGAAGAGAGTTCATGAAGAGATAAAGAAAA
>A03:5M6M:734051	ATTTGAGATCAGCTATTGACTGCCTAGAGAGACATCCTGATCTCGAT
>A03:5M6M:736801	TTGGATGGGGAAGGCCTTTCTTCAAGAGAACTTCACATATGAACGAA
>A03:5M6M:737201	AGATGCAATACCTCATAACAAATCATACCTTTCTCGGCCTTTTGGCT
>A03:5M6M:738051	CTTCTCTGACGCTCTTCGAAGATCTGATTTACCGCAAGGAAATGGAG
>A03:5M6M:747151	TCTTTGCTTAGGCATGAGTCTATTTCACATGCATTGGTTTCACAGGT
>A03:5M6M:748201	ACCTGTACAAAGAATGGCCAATCTTGGAAGAATCAAAGACAATACCA
>A03:5M6M:748351	AACCTCATGATGCTCCCAACCCTCCAGCATATGAACCAATCCTCCAG
>A03:5M6M:753651	CAAGAACGTGATCGTTAACCAAACCGTTCTTTATACCTCGCAGGTTC
>A03:5M6M:748651	GGAAATGCGTTCCTGCAGGAGCCCAACTCTGCTCCCTCGGCGTTAAC
>A03:5M6M:754251	CTTTTGGAACCTCTCCGTCGATAACGTCAACATCTGTCAATCGTCTA
>A03:5M6M:754451	TTTCATTGAGAATCACTGCTGCGGTTAAAGTGTTGCCGTGGACCACA
>A03:5M6M:749651	TTTGGGTTCTGACACAAACCTTGTTCAGAGCAGCCAAGCTTATAACT
>A03:5M6M:754701	TTCGATAAGATTATTAATGCCTTGTTTAGCAAACGGTAAGAAGTACT
>A03:5M6M:750551	TAAACGAATCTTCTTCTGGAGTTCCCACGAGTTTGGGTTTAGTGTGT
>A03:5M6M:744951	GTAGATGACATATCGTAGGATTGGAAGAGACTCAAATAGCTTGTGAG
>A03:5M6M:756251	TCCTAAACATCTTAGGAAGTCAAACGTGATAGCGTATCCGTAGATCA
>A03:5M6M:756351	ACCACACAGAGGATAAGGCTTTCCAACAACGTCGCATTATTAGCTGC
>A03:5M6M:756451	AAAATTTTACCAGTCATGGGATTTGGAACAGGAGATGAGTGGTGGAA
>A03:5M6M:751501	TGGTGAAGAGGTAGTTGTTACGATGAACATATCTATGAAGAAAGTAG
>A03:5M6M:751601	CGTGTTCCACAGAGGGATGGCCAGAGGGATAGTACTGTTAATCATCA
>A03:5M6M:745701	ATGGTTTGACTTTACCAGTGCCATTCGTGATCAATCTGTTTGAAGTC
>A03:5M6M:751901	TACGAGGCCTTTAAGTCCACAGATGATGAGGATATTGAGACACCAAA
>A03:5M6M:752001	AATGGAGCGTACAGAAGATACTTCACAGATAGAGAAGACATACAAAA
>A03:5M6M:757251	ATTCAGAAGAGAAACCAAACGTTTGAAAAAACTTGGAGCAAAGTTTT
>A03:5M6M:752151	CTTTAGATTGCCATAGTTTCCCCAAGGCCAAGCTGATAGAGTAACCA
>A03:5M6M:758351	ACGTCCAACGTTTTGCCAAAGCAACAAGAGGTTGACTTAACATGGAA
>A03:5M6M:758601	GAACAAGAAAAGACTGTCGGAGAAAGTGAAGGAATATCTAAACTCTG
>A03:5M6M:759301	AAAATGGTGAAGCCTGATCCAAGGAGAGTTCCAATTGAGTAAAGTTA
>A03:5M6M:759551	ACCTGTCTAGTCTTTGATAAGTAGTTGTATGTCGAGAAAACTGTTAC
>A03:5M6M:760101	AAGTACATCATCTGTCAATGTTACAAAGTCCCTAGTCTAGTTTTGAA
>A03:5M6M:760251	TGATATGACACAGTCGTATTGGAGCATGCACATGAGTCCCCGAGAAA
>A03:5M6M:760551	ACATCCATCGACTGATGTGGTGATCTAATTCAACCAAATTAGTTAAT
>A03:5M6M:761501	CTAGTCGGATTATTCGTCATCGTTATCCGCTAGTCGCTGTTGACTAG
>A03:5M6M:761601	TACAACGTAGTTTGTTGTTGAAATAGTAATCATCAATAATATGAGGC
>A03:5M6M:762651	CGTGTCTTCGTCCAACTTATCTATAAAATCACATCGTCTCTTGTTTA
>A03:5M6M:762801	GTGTAGAGGGCTTCAAGTTCGGAGAAGAAAGAGAGTAATGGTTAATG
>A03:5M6M:762901	ATTTATTCAGGTGAAGTTGACGATAACACACTTTACCGTCTCACGGC
>A03:5M6M:763001	CTTTATGTGGTCTTTAGATCGAAGATCCATAACCATATATTCACGTG
>A03:5M6M:763201	TGTGAATTGTGAGTAGTCCTTTTACATGCACGCAGCTTTGACCGCGT
>A03:5M6M:764001	TCACCAAAATGTTGTTTTTGTTGTATGTGCTCAAAGTCAAAGACCCA
>A03:5M6M:764101	CAGTCTCCGGCGCTAGTATTTGAGATGATATCTCATGAATTAAAAGG
>A03:5M6M:767751	TTTTCTCCGTTTAGATCTTATAACATAATGCATAACAACTTGAGAAC
>A03:5M6M:767801	GTTCTTTTAGAGTCCACAAACATCAGCTAGCTTTCTCAGTAAAGTAA
>A03:5M6M:767901	TCGTCATCCACCTCTTCACAACTTGGTAAAACCCTGCGCAGAATCCC
>A03:5M6M:768001	AGCGACCATGTGGCTTGACCTTCTTGCACTTCACCATCTTTATCACG
>A03:5M6M:768201	TGTCCATGCCAATCCACCCTTGCAATGTTTAATGTTCAATGCATCTC
>A03:5M6M:769351	CAAAACTAATAAGCCTTGCAAGGTCAAGAAAAAAATGCCTAAAACAT
>A03:5M6M:771401	TAGTATGCATGCATGCTTATTACCGATTCCTCAATGTTCAGATTATC
>A03:5M6M:773451	TTGTCTTAACAATACCTTAATCTGTGTCCTGTTATACGTATAAGTGA
>A03:5M6M:773551	CCAGGAGTATCCTCCAACGTTAAAACATCGGTCCAAGAATCACCGTC
>A03:5M6M:773651	GCACTAGCCTACCATCCTTTAGCTTGACTCCATCAATACCTGTCAAT
>A03:5M6M:773751	TTGCTTGGATTCCAAGAAACCTGAATTAGGGTTTGGGAGAACAGTCG
>A03:5M6M:773851	CTGTCAATGCCGGTGAATGATCTGAGTAGAACACGTAATCTTCCAGC
>A03:5M6M:774051	TAGGAAGGTTGAAACAAAACCTCCATCCACGCTCCCCATGAGTTCCA
>A03:5M6M:774251	GTCCGAGAATCCCTGGAGGAAGCTGTTCTCTGTTGGTCCAGGTTCTA
>A03:5M6M:774451	GTAGAACAATAAGAGCTCTTGGGAAGGAAGCTTGAACAAGACAGGGT
>A03:5M6M:774651	GATTTTGACATCAGATGCTCCTTCATACGTGCCTCCGAAATAGGCAG
>A03:5M6M:774851	TGACAACTCTTGAAGGGAGCTGAACCAGCAGGGAATGTGAGAGTCTC
>A03:5M6M:775401	TAGCGATTCCTAACGAACAATTAACGAACTTTGGTGGGAATGACAAA
>A03:5M6M:776051	GAAGAACAGGTGTTTGATCTTACGGAAGTGAAGCCTAACGAGTTTAT
>A03:5M6M:776251	CACTTTTATTACAGGTTGCAGGTGGAGATGGAACTGTTGGTTGGGTT
>A03:5M6M:776351	TTCTATAATGCCACTCGGAACTGGAAACGATCTCTCTAGGAGCTTTG
>A03:5M6M:776501	ATTTGCCTGGAAGTCTGCGATAAAACGAACACTTTATAGGGCAAGTA
>A03:5M6M:776651	AGTTGGAATATTTTGATTACAATGCCTTCTGGGGAAATAGAGGATCC
>A03:5M6M:776901	TACGGTTTTCACCATTTGCGCAATGAAAAGCCTAGCCTTGCGAATGG
>A03:5M6M:777101	CTTTATGGAATACAAGAACAACATATGTTACAGCCTCAAAATCATGG
>A03:5M6M:777401	GAAGAAACCCATGGGGGAATCTCAAACAAGACTATCTTGAGAAAGTA
>A03:5M6M:777501	CGATTGTTTGGGCTGTACGTAACAGAGAGGCTTTGTGGAAGCTCAAG
>A03:5M6M:777601	TTCGTTATGGTTGAACTCATCTCTGCCAAACACATTGCACAGGTACT
>A03:5M6M:777701	TATGAAATAAATTAGGGTCAGGACCAGCCACGTGCACGGTGCACAAC
>A03:5M6M:778101	GCGATACGGCTAGAGATAAGAGGAGGAGAATGGAAAGATGCGTTTAT
>A03:5M6M:778201	TTGTTGACATCAAGAGAGTCCCTCACCAATCTTTGGTCGTCAAAGGA
>A03:5M6M:778351	ACGATATAATTAAAGAAGACCAAATTGGCAAGGCTGGTTTCAGACAA
>A03:5M6M:778501	CCATTTGTACGTGCGAACCACTTGCAATTTCTCAGTAGTGTCTTTTA
>A03:5M6M:790401	CCATGGGCTTTTACTTTAGAGAATCCATGTATATAAAACTACGTAGT
>A03:5M6M:790751	AGGACGTAACGTAAGTGACTGGAATAGACAGAAAACAAAAAACGCAA
>A03:5M6M:790851	AAGCTGACGCTGAGAAATGGGCCCTTACTATCAATTATTTATTCAAA
>A03:5M6M:790951	AACTTCGTTAGACGACAAGAACAAACACAACAAATATTCCGCAGAAA
>A03:5M6M:791201	CAGGGAATAGCTCGTAGATTTTCTCAAGCAAGCGCCGATCGAGTTTG
>A03:5M6M:792501	CAAATGATAGGAACTTGACCAAGTAAAGTTTGATCCAAATAGACTGG
>A03:5M6M:792601	TATATCTTTAGCATTGGTGACATAATTGAGGCCTCAGGGATATGGTT
>A03:5M6M:796451	TTATGTAGGTGATTTTAGAAACTGTAGAATTAGTTGCAGGTTGAAAA
>A03:5M6M:797201	ACAACGTTAATTCGCTTGCTCTCTTCTATAAATCCCATCGTCACACT
>A03:5M6M:797351	TCCAAGAGAGAACGTCGACGGGAACAGAACAACCTTGGGAGGACCTC
>A03:5M6M:797451	CTTGGTCTCATAGCTTTCGCTCTTCTGATCCTCGCCTGCTCTTACTG
>A03:5M6M:797701	ATTATGACGTGAAGGCTGGTGATCAGGTGGTGCGGCGGAGTACTGAG
>A03:5M6M:797851	GTTGGTTCTGGTATTCGGGTCGGGTCAGAGCTTTGCATGATGAGATT
>A03:5M6M:798201	ATGGTCATGACTCAGGACCAGTTCATGTTTTCTCGTGGGGTTAATGT
>A03:5M6M:798351	CTCTGATGCGGCGAGGTGAAGCAGTAGTTTCAATCAATGGTTAGTGT
>A03:5M6M:799851	AGAGCTTTTTTTTGGCCCATGTGCACTTTCTATTATTTTTGCCTAAA
>A03:5M6M:799951	CCGCTAAACCAAATACTTTAGCAATATGGCATATAGTGAGTTAGCAT
>A03:5M6M:800201	CACCAAAAAGGAAAAAGCCAACAAAAACTTTTCTTAGAAAAACTGGC
>A03:5M6M:800451	GAAAAGAAGGAAAGATAGACTAAAAGCAATTATGGCAATCTAATCCA
>A03:5M6M:800751	TTCCCTCTCAGACACAAACTGGACCCTTCAGAGCTCATAAACATCTT
>A03:5M6M:800951	TGTGAAAATCATAGACAAGGCTCTGGTTATCCAAAAGGGTCTACAGT
>A03:5M6M:799051	GAGAGAGATACGTACCATGAGGCTTCTAAACCATCCCAACATCGTGC
>A03:5M6M:801151	ACCAAGACAAAGATCTGTATTGTGATGGAATATGTTGCTGGTGGCCA
>A03:5M6M:801751	TGGATGTGTGGTCTTGTGGAGTTATTCTATTTGAGTTGCTTGCTGGT
>A03:5M6M:801851	AGCAGATTACACATTCCCACCAGCATTCACTGGAGCACAGAAGAAGC
>A03:5M6M:802001	TGAGAACATTTGGATGCAGCGTATGAAACTAGCTGAGATAATCATTC
>A03:5M6M:802101	ATCAAGGCAAGTTGATTCACTAGATGTCTGAAATGCTAATAGCTTTG
>A03:5M6M:802201	GCAGGAAAATGTTGCTGAGATAAATGCAGAAACCGCGTCTTCAAATT
>A03:5M6M:802401	CTCAGGATGATAAGATTTATAAAACCAAAATTGGGTCCAAGAACACT
>A03:5M6M:802651	TTCTTTTGACTTATTATCAGCAGAGGTTATTGAGGTGACTCCAACAA
>A03:5M6M:803201	AACTTCGACATATGGATTCTGATCAATTAGAACTTTCCCTCGTGCGC
>A03:5M6M:803851	ACTCCTGCACCGTTGTCACAGACCAGACTAGCGCACCCGAGCCTTTT
>A03:5M6M:804001	ACCGCGAATCCTGGTGCCCAGCTCGAGCCACTTCCCCAGAACAGATT
>A03:5M6M:804651	GAGGCCGATAAACAGGCTTAGGGCTCGGAAGTGGGATCCATGGCTTA
>A03:5M6M:804801	TGTTCGTCGATGAACTGGTCGCCATCTTGTGGTATGACTATGAAATG
>A03:5M6M:806201	AACTCGAACCGTTCGTTAGCTCAAACTCGTTGCCCACTTGAAACAAT
>A03:5M6M:806301	ATCCTGCGAAAAAACGAAATTAGGTTGAAATCCGTGAGTAGGGTTTA
>A03:5M6M:806501	GTAGTGGATGAAGCTTGGGCCACAACATAGGGTTGTTATAGAAACTA
>A03:5M6M:806951	TAAGATGTGCCATAGCTTGAAACATGGGCTTGCATGTGTTTCAGCAT
>A03:5M6M:807151	GAATCACTTACCGGCTTCCAATGCTGATGTAAAGACTCAAGATGATA
>A03:5M6M:807301	ACACAAAACCCTAAAATCAGGACAACGAATTGGGGTAGCAAACCAGA
>A03:5M6M:807601	TTCACATCTTCTTCAGGCGACCATGGCCCTTTTTTCACGTTTGCCTT
>A03:5M6M:808001	TCAGTTTTAATAATCATTAACGCAAAGAAAGACTTGCGTGAAATTGT
>A03:5M6M:808101	AGGAAAAAACCATCGCCTTGATTTGTCGTGACTTGGGTTGAAATGTT
>A03:5M6M:808251	ATAAGTGAATTCTGTTAGAAAAGGTATACAAGCTCTTGACTTTCTTA
>A03:5M6M:808801	TAACATGATGAGTATGAAAATGCGTGTGCCGTAAGGAGAAACGTCGA
>A03:5M6M:809701	AAAATGCTAATGGCTTTTCCAACCATACAAGAGTTGCGTTTTAAAGT
>A03:5M6M:809951	AGACTTTTCTTAATGAAAAGTGAGGAGCCTAAATACAATAATTGATC
>A03:5M6M:810101	GTTATTAGTTAGTTAAATAATCAAGTGAGCTAAGGAACCACAACTAT
>A03:5M6M:814451	TCACTTGGGTTGACTAACACAATACCGTACGTAACTTCCTTTGCAAT
>A03:5M6M:814651	GAGTTTGGGATATGAAAAATGTCATTAGCGCGTGTTAGGTGTTGTAA
>A03:5M6M:815151	CGGAGTTGATAATGTCATGCTTTAATTCTTCTCCTACTTCACTTGCA
>A03:5M6M:815351	TATTTGAGACAGAGATATTGAAAGGATTGCAGTCCTGTCAAACTTTG
>A03:5M6M:815451	CTCTATACAACACTAATTTCTTTGTTTAGTTTGTGGGTTGGGTTGGG
>A03:5M6M:815901	ATTTTAGCTAAGCCATCATCAACACTTGCTTTCCTATAAATATTCAG
>A03:5M6M:816301	AATAGAAAGAAGAAAACAATATGAACCAGAGACAGAGAGCTCAATGA
>A03:5M6M:816451	TCCAACCGCAAAACCAAGTGGTAACTTAAAATAGGCTTAACTATACT
>A03:5M6M:816601	TTCAAATTCATAGCAGCAGCCATATTCCTGAGCTTCTGTGATATATC
>A03:5M6M:816701	CTTTCCACTCTGGATCACACCACTGTGGGATTTTCGGACGCAATGTA
>A03:5M6M:816851	ACCTATTATAGAAGCACAGTGCATATCTGCGTAAGGCTCTTCACCAG
>A03:5M6M:817051	TTGCCACTCAAGAGCTCCGGTGCCATCCATGGCAATGTTCCGCGAAC
>A03:5M6M:817251	GAGGATCTCTCATGTTCACTAGAAGATTCTCGCACTTCAAATCGAAA
>A03:5M6M:817351	TATGATGAGTCTTTTGCGACGATCAATAGTTCTGGATGAGTCAACCA
>A03:5M6M:817501	GTTAACCATGAACTCAGCAACAGTTGCTAGAGAACCATCAGGACCAT
>A03:5M6M:817601	AGCAGAGCTTCTTTCCAAAAATCTTCTATCTGCAAAAGAAAGAGAAT
>A03:5M6M:817701	AATCAATATTACCAAACGTTCCCTTTCAGAAGGTTTTCCTGCAAAAC
>A03:5M6M:818001	CTCAATCTTAAAATTGTTTGGATTGTCGCTATCAGAGTCCTCATGTT
>A03:5M6M:818201	TTCTGGATGAGCTTTCACCTCAGCAGCTCCTTCAAGTGCCGCCCTCT
>A03:5M6M:818301	GCCCCTTCAGGAGGAGCAGCAGCAGAAGGACTAACTTCTACCATATC
>A03:5M6M:818501	TGCACCATCGAGGTTTGTCTGTAGCATGGGCCCTGTCAAAGGCTTAA
>A03:5M6M:818701	CGACTAAAACACTTTGATTCTCCACTCCAATAGAATATCTAGAAGCA
>A03:5M6M:818801	CATAGGCAAGCCTGGAGCACCACTTATATGGTTTGGAACGTTCTGCC
>A03:5M6M:818901	GGTCCTGGAGCATACAGATTATTCCCATAGTGAAACCCACGTTCCTC
>A03:5M6M:819051	ATCCCAGGACCATCAAGAGTGTAATGATCACTTGGTCTTCCAACATT
>A03:5M6M:819201	TTTGCATAAGCCCCATGAGGAGTAGGAGGCTTTGGGTCTGCGTTAAG
>A03:5M6M:819301	GTTGAAATCCATTAGCTTGATCAAACGGCTGATGGTTCTTATGAAAC
>A03:5M6M:819401	ACCGTGAAGCACATTCCCAGGAAAACCTCCTTTACTCTCAAGCGGCG
>A03:5M6M:819551	CCCCTTATCAAGAACTTCCCCATACGGCATCCGGTAACGAGCAGACG
>A03:5M6M:819851	CCTCGGCGAGTCAGGATACTGCTGCACCTTCCTAAAATCCGTCCCCT
>A03:5M6M:820301	GTTCAAGCTGGAGCCTGGGCTAGTGACGGAAGATGAGTTCACGGAAC
>A03:5M6M:820601	GAATCACGCTTCGAGCCTCTGATCTATCTTGGTTTTTGATTTGATGA
>A03:5M6M:820851	GCATATATCATCATCATGATCATGATCAAGTGGGGCATATGCTTCTT
>A03:5M6M:826551	TGTAGGTATACTGGAAGAGGCCTGTTTCTGGATCCTCCTACTGTTTT
>A03:5M6M:827701	ACTCTGCGGTTCAAAGGGTGGTTGTATTAGGAACCCTTTTCGCTCTA
>A03:5M6M:830001	TGATTGGACTAACGCTCCATTCAGCGCTTCTTACAGGAGTTTCAATG
>A03:5M6M:830151	GATGAAGTGGGTACAAGATGACTACATGATCTATAACTATTGTAATG
>A03:5M6M:830901	GGACAAGATTGGTAACTAATAAAGTTTAGAAGGTTGCATTCGTGTTT
>A03:5M6M:831901	TTCCGTGCATTCTCTCATCTAATTAATACACGCCACCAGATATACCT
>A03:5M6M:833451	CGATACCACTCTCCGGCACACGACGGCCTGAGAAGTCCCTGGGGCCA
>A03:5M6M:833651	CCACCTAGAGCCTGAGAGCTGTAAAATTTTCTTTGACAATAGTTACA
>A03:5M6M:834401	TATCGTTTCAGAGTGTTGAACACCTTAAAAATTATATCCCATGTGGT
>A03:5M6M:835901	AAATTTCCAGTAATGGCAATGAACACTTGCCGTGATAAAGGTTTTGA
>A03:5M6M:836251	TTGAAAGAGATTACGTTTTCGTACTAATCTCTCATGCTTGTTTCGCT
>A03:5M6M:836801	TTATGAGGAGACGTGTAAGATGAAGCGACCAAAATAAAGTTAAAAAG
>A03:5M6M:838001	CAAGTTGATTCGTTTATGTAAATTCGCCGTACGACTTCAACCAATAG
>A03:5M6M:842951	GATTATCAAAGAAAGTAAGGAGAATAAAAAGAAGAGGACATGGCTGA
>A03:5M6M:844851	AATTAACTTTACAGAGAGGAAGTGGCAAGATGAGACTGTTGCGGGTC
>A03:5M6M:845701	TAAATAAAATAGAAAATCGCATGTTAAATGGCGTGAAATACTGAAGC
>A03:5M6M:846001	CAACGAAGTTAGATTCGACAGTTTCTTGAGTTTCGGACGATGTGCTT
>A03:5M6M:846101	TCAGATGAAGATGAGATTAGGATACTTATTGGGATTCTTACACTTCC
>A03:5M6M:846901	ACCCACCATACCACTACGTAATGAAAGCCGACGATGACACGTACATA
>A03:5M6M:847151	TGGCGACTGGATTCGAGAAGGAAGACGAGGGAAGAACCGGTTTAATG
>A03:5M6M:847251	CTTTGGCCTGATACTATTGCGGTTCATTTGTTGAAGAACCAAGAGAA
>A03:5M6M:849201	AAGGATGATTTATTTTTTGGCGACATAAGCACACTATATAAAGGTCA
>A03:5M6M:849351	TATTACGTAACATCTTTATGCAGGTGTCGACGAAAGTAACTGTCAAA
>A03:5M6M:849651	CAGACTGTTAGCCTCGGTGGCGAAGTTGGTTTCGACACAGCTTCCTC
>A03:5M6M:849851	ATAAAGGGGAGAGTCTAAGAGCTACTTACGTACACACGGTGAATCCA
>A03:5M6M:851601	TCGCGTGGAGACCGTTGCCCGAGGAGAAACGCGGGTTCACTCTCCGT
>A03:5M6M:851751	CGAACACGCGAGGCGGGTCTCTGGACTCGAGGGGACATCCTTGGGAG
>A03:5M6M:851901	TGTTTTATCAGAAGACGGGTAGGGCTTGGAAGAGAGGTTACTTGCTG
>A03:5M6M:852001	TCTAGGCTATGATATTTACGATCTTGAACTCACTGAGGTGCATAGCA
>A03:5M6M:852101	ATCGAAGACATCGACTGTTCGATCAACTTGACGAACCGGAATAAGAG
>A03:5M6M:852551	GATGGAGAGAGTGGTGGAGAAGGCGGAGATGACGCCTGCGGATGTAA
>A03:5M6M:852701	GAGGGGTCAAAGTGGAAATTTGAGGGAGTTGGAAATTGTGGAGGAAG
>A03:5M6M:852951	AACCGTGAAAGTGACATAGCAAGAACATGTTAGAGTTGTGAAAGTTT
>A03:5M6M:853801	ATTATAGTACCTAAAGCTCTAAAGTACACATGATTCTCGCATTAAGA
>A03:5M6M:853901	CATGCAATGCCATTTGTTAATCCTGTGATTGTTATAATTGGTAGTTT
>A03:5M6M:855051	TCTTAAAAGAAACTTTATCAATTGCACATGTAGACTCCGGTTTCGAA
>A03:5M6M:856401	ATCTCCGGTTCTTCCTCGCTGTTATCTGAGTCTAAAGGCATCCGCGC
>A03:5M6M:856601	AGGTAGGTCCGGGCTTGATACGTATTGTATCATCAGCGAGAGTAAAG
>A03:5M6M:857101	TCTTTGGTCCCATAAACTCCGAAGGATCCAACCCACCTCCCCAAGCA
>A03:5M6M:857201	AATCCCACCGTACTCCCCTTCGAACCCTTCCACATTGATGTGTGTAG
>A03:5M6M:857301	AGAGTCAGATCCTGCGAGGAAGGATCCTTCGTCTTCTTGAACCCGCC
>A03:5M6M:857551	CGTGAGACTCCACCGCCATCCAGCTATCAGCTCCTCTGATCTTATTC
>A03:5M6M:857801	GATGTGGATACACTCGAAGACGTTGATCGAGTTGTCGTGATCCGCGA
>A03:5M6M:858051	TGCTGCTTTGAGGAGGAGAAGGCTTGACGCGTTTGGCGGAAGTAGGA
>A03:5M6M:859051	CTCGCTCTGCGCCCAGCTTCCGATTTCAAACGGCGGACTCGACGGCT
>A03:5M6M:859151	CTCTCGCGATCGTTTCACCTATCGAACCCTAGTATCTACGCGGACCA
>A03:5M6M:859501	TGGGTTGAGTGGGTTGAGGATTGGGAATTTGAGGTGTTTGTATTCGT
>A03:5M6M:859751	TTCGTGATCACAGGGGAGGGGATTTGTGGAGTTAGGTGATCTATGGT
>A03:5M6M:861101	GAATCACAGTCACCACCATCAGCAAATGAGAGCTCATAATTAAAAAA
>A03:5M6M:864251	ACATTCCGTTTCAGATAATTTGATTTTCGAATTTATTTTCGCTCTCT
>A03:5M6M:871351	TGTGTGTGTTGGTATTTGAGAAGGGATTACACATTCGCGAACGTTGA
>A03:5M6M:871501	TTTGTTTGATTCGTCTATTAATCCTGCAATCATCTGTTGTGGTGACG
>A03:5M6M:864801	GAGGACCTGTAATTGCATGTACTCGTTGCTTCAGCAGCGACAACGTG
>A03:5M6M:871951	GGTTCTTGTATGTAGACAACAATCGGATATAGCTAGACTTGAAGCTA
>A03:5M6M:872301	ACATTTATTTTTTTCGATCTCTGAATAGCAAGTCAAAGCTCAACAGA
>A03:5M6M:865601	TTACATTAAATTGCAGGTTGTGTATCGTCTCTCTCGTGGAAGTGACT
>A03:5M6M:872451	ATGAAAGATAAATTGTGTTTCTCTCGCAGGAACGGTTGAATCAAGTA
>A03:5M6M:865851	TAATCTGATGTACGTATACAGAAAGAAGGGAGGCAGCGTGGGACCTG
>A03:5M6M:866001	AAATGTCATCCTTGCAGGTGGATGCATATGAAGCAAAAAACCAAGAG
>A03:5M6M:872951	TTGCAGACAGACATGCGTGATTTCTTAAACGCTCCAAACGGGTCAGC
>A03:5M6M:873151	CTTTCCGTATGGCTAGAGGTCAAATAGAAGAAAGTTTGCGCACTAAG
>A03:5M6M:866751	CCATAATGTGTAAACACCTCCCAAAATCAGAGCAGCGAAAGGTATTC
>A03:5M6M:867001	ATGAGAATGTTGGAACTCGAAAACCATGGATCCAAGTGAAGTTAGTT
>A03:5M6M:883901	AGAAATCGTATGCACTATGCTAATAAGATAACACCATCTCATGGCAA
>A03:5M6M:885151	TTGATAGTAATGTGGGCCCAGAAGAAGACATGGATCCTTCTTCATTT
>A03:5M6M:885351	ATTTCTCGCATTGGATTCGTCGTTCGTCGTCATTGTTGAAATTTTTG
>A03:5M6M:885551	GTGTCGTGTGCACTGAGTTTCCTAAAAAGAAAGGTTTGAGTGTAAGC
>A03:5M6M:885801	TGACCGTAAAAGCTCGAGGAGGAAGAGACAGAAGACGACGACTAGTT
>A03:5M6M:885951	CAAAGATCCGAGTCTATGGATTGCTTGTGAGGGTTGTGGTTTGTCTT
>A03:5M6M:886351	TGGGTCCGTTAGTGAGTTGGGAGATGAAGATGGCTGGAGGTATCGGC
>A03:5M6M:886651	AAAACCGGATCACAGGTGTGAAGGATGATGGAGAGGAAGCAGGGAAC
>A03:5M6M:887201	TTCTTTGGGACAACAGCTTGTGGATACATTCTCAGAATGTATACAGA
>A03:5M6M:888901	TTTTTCTTTGTGAGAGTTGATGAAGAAAAAGTACCCAAGATTCTATG
>A03:5M6M:889001	AGCCGAGTTTTGAAGAACCTTACTTGTGAGGCCATGCCTTCAGATCA
>A03:5M6M:889151	ATCCATGTTGTTCGAGTGTACCAAAGTTACTGAACTGCACGCACAAA
>A03:5M6M:890201	AGAAAGGGAGGATACCTCGGCGGAGCGGTTGCGAGACTCGCGGAGGA
>A03:5M6M:890501	TTTTAAAACATGGGATTAATGAAGATTTACTGACCACCTGATTAAAG
>A03:5M6M:891051	CCGTTTTGAGCTTGTTTTGTTTCCACTTTGGTAGTTTATAGAACTCA
>A03:5M6M:891351	TCATTGATTCATCCTCTGCCGTCTCTGCTCCGTTTGTAGCTTCATAC
>A03:5M6M:891551	TTTCTCGAAAATCGCTGTGCGGGCAGCAATAGCTGCGGATTTGGGTG
>A03:5M6M:891801	GGAACGCTGGACCGGCCGCTGTACACTGGTACTCTCCTTTTAGGTTT
>A03:5M6M:891951	TTTTGTTTGTTAGGACTGCGAGCTTTCTCTGGAAAGAGTCTCCATGC
>A03:5M6M:892501	ACGTTTACCTTTAGAGTTTCTGGTAAGATAGCAACATCCACAAGAAC
>A03:5M6M:892701	CGGATATTCTGATTTTCCTCCTAATAATTCCCAGAACTGTTCAGACT
>A03:5M6M:892901	ATTCTCTCCATAAGTTCTTGATCATCCGAGGTAGTTAGATTGCCACA
>A03:5M6M:893101	GCATCTATCTGTATGGCTTGCATGTCCTCTGGTCCAGAACCTTGGAC
>A03:5M6M:893651	TTCCTCTCTGTCATCTCCGGGATATGAGTACTGCAATATATAACAAT
>A03:5M6M:893951	GCAAAAGAGCTGGTGAAGAAACAAACAGAGATTAAGCATCTCACAAT
>A03:5M6M:894151	CACACTGATTAGGTTTGATTTTGGACGTTCAGACGAACGGAAAAATT
>A03:5M6M:894351	CACTTCGAGACCGCAATCGAGAATATAACATTTGTTAGTGTCTAAAA
>A03:5M6M:896351	AAATGTGATGATCCGAGAAAGTAAAAACGAACTTTGTGGTGAGACTT
>A03:5M6M:897251	CCTCTTGCTTCCCTTCATTCCCATGCCACAAGTTTTGGTATCACTCT
>A03:5M6M:897451	GCAACGTTTTCACCAATGTAGCTTCCAGTTATGATATTATGAATGAT
>A03:5M6M:898001	TCCTTTGCTATCTTGAATAGGTTTAAGTGACAACAGGTCACTCGTAT
>A03:5M6M:898301	CTTGAGCTCAGCCATGTTGACATTCCGGTCTTCAAAGAACTGTAAGT
>A03:5M6M:899851	ACTAGTAACGAAAATCAGAAACGCGACTTGCGTTTCCTTGCGGTGTA
>A03:5M6M:900151	TCAAAACCCATTCCCTTCCTTTCCCTTTCTTGTTCGTTCTCTGCTTC
>A03:5M6M:900401	CGTTAATACTGGTTGGAACAGAGCCACATGTGAGGACCAAGAACTCT
>A03:5M6M:900751	GCACATACTTTAGCCTCAAACGAGGTTCATGCGATGACTTGTCAGCA
>A03:5M6M:900951	TGATGGCTCCATCTATGACTCCTGCACGAAGACCTAAGCCCTGAGAC
>A03:5M6M:901101	GTAAAAGATCACCCTCAACTTCTCGTTCAACAGCAACGTCTACATTG
>A03:5M6M:901551	TCATCTTCAGGCAAAGCAAGAAGCTCCAAAGCTCTCTCAGACAACCT
>A03:5M6M:901701	AGCACCTGAATTTCGACGATACGTGAGGAAGAAGTATACTTGCGAGC
>A03:5M6M:902651	TCTGATTTCTTTCTTTTTCTTAATTTCAAAGCGAAGAGAGAGAAAAC
>A03:5M6M:902901	AAAGATTCTATTTTTATCTACCCATCTTCTCTTCCATTACCAATTCT
>A03:5M6M:904251	AAATCGAAGATAGCGTTCATGTTCTTGACCCCTGGTACTCTGCCGTT
>A03:5M6M:904351	ACATCCACCCGTCGAGGCTGAGACCGGTTCACATCAGCCGTCACTTT
>A03:5M6M:904651	ATTTGATGCAGGGTAATGTCAGCTTCATTGACAGGTAAAGTAAATGA
>A03:5M6M:905301	GGAATCTCGAACTGGTCAGTCACATATGTTGATTGGTCTGAGCGTAG
>A03:5M6M:905501	GCTCCTTGCAGTCTGATGACGTGAGTGTACACGTGACAAGCGTTGGC
>A03:5M6M:905651	AAGAGCTTCATTGGCCATGTACATGGAACGGTATAAGAAGACCATGT
>A03:5M6M:906951	GGCTTCTATCGCTTCTCTTCCTCATCTCTATCCTTATCACCGCCGTG
>A03:5M6M:907201	AGATCATGACCTTAATTGTTGTAGCCGTCCAAGCGTGGAAGGTATCT
>A03:5M6M:907351	TTGCTTTCTCTAGATATGATGATTACTGGAAAGAGTTAAGGAAGCTG
>A03:5M6M:907551	GTGGTTTGCAAGGCATCATTTGGTGTGAGTTTTCAAGGGACTGTGCT
>A03:5M6M:907651	GCTTCTCTGCTTCAGATTTTTTCCCCTATATAGGTTGGATCTTTGAT
>A03:5M6M:907801	GAAGTGAAGATGATTTTGTGGACTTGCTCTTGAAGCTGGAGAAGGAA
>A03:5M6M:908351	TCTGCAATAACCATGACATGGGCAATGGCGGAACTCGCAAGAAACCC
>A03:5M6M:908501	AAAATGGTAATCAAAGAAACATGGAGGTTACATCCAGTGTCACCTCT
>A03:5M6M:908601	AACCAAAGACAAGGCTTCATGTCAACACATGGGGTACTGGACGCGAT
>A03:5M6M:908751	GTCGAAGAATTTGTCCAGCAATGTACATGGGGGCGACAACAGTTGAG
>A03:5M6M:910701	TATCCGTCCCCGCAAGCATCATACTCTATATGCACATTCAAATATGT
>A03:5M6M:911401	TCTCTGTCACTAGTTTCTTGAATAGATTCGCCTCTTCCTCGTTGTGA
>A03:5M6M:911801	TGTATTAAACGTTGATACATGTTTGTTTAGATGAAACTAACCTGGTC
>A03:5M6M:911951	AGTCTCGTGAGCAACCGTTGGATCTCGTCTCTACGAACGGAGAGGAG
>A03:5M6M:912101	GCGACGTATTTGGCGGTCAGAAAATGCGGCCGGTTTGTTAAAATGAC
>A03:5M6M:912251	GCAAAGTTGCGAAAGAGACGGTGGACCGGCGGTTTCACGAGGTGGAG
>A03:5M6M:913251	GTTTTGAACGTGAACTCTTCAGTCTTTTTTTATGTTTTCTTTCTCCT
>A03:5M6M:913351	GTGATACCTTGTTCATACAACTTTTCTTTGAGTTTCACTGGTTATTG
>A03:5M6M:915951	TGATGATAATGCAACATGGAGGTAGTCGTATTGACCCGCCATCTTAA
>A03:5M6M:916051	ATCAGTATCACGGTACAAACTCAATTGGTAAAGTCTTGCTTGATTAA
>A03:5M6M:916351	ATATATAAAAATGTGACGTGGTCAGGAAACTGTGAGGTAGTCGTATA
>A03:5M6M:917151	TTAAATCCGAATGAGATGACTTACGAGTTTTGTTGCTATTGCGAGAC
>A03:5M6M:918551	CAGTTTCTTTTGTTGACAAAAGCGTAAATCAATCATTGGTCCACTCT
>A03:5M6M:918901	CTCTGAGCTCCATTATAAGCTCCTATTCCTGATTCTATTTTCAACCT
>A03:5M6M:919201	TAGACATAGTCATGTAAGAGACAGGTCTCACCAAAGATAAAGCCACC
>A03:5M6M:920701	TGGGACCAAATTTCTTAAAAAGGATAAACTGAAACAACACTCCAATA
>A03:5M6M:921101	CTTTAAATCAACCAGAAAGGTCTATGTCGTCTAAATCAGTATCAAAT
>A03:5M6M:921551	GACCTCAATGAAGAGAGTGTTGAAGATCATGCCGGAGAAAGAGTTGA
>A03:5M6M:921751	TTTTTAGTACCAACCGTTTTTTAAATTTGTGATTCAAGGTGCAACTA
>A03:5M6M:921851	ATCAAGCTGCTTCATCCTCTTGGATGTGACAGGAACCAGTAGATCAC
>A03:5M6M:922101	GTTTTGAATTGCGAACCTTAGTGATATTAGGAACAACTGCACGAAGA
>A03:5M6M:922401	TAATTACTGAATTCTTGGTTGATATCGTCCATTTTCCGACGGATATC
>A03:5M6M:923151	CACCGAAAAAGCCATAGTCAAAGAATATCAAACAAACTCGGTGTTTC
>A03:5M6M:923251	GGATCTCATTTTGTGACCATCTGAAAAACGTTTTAACGACCAACATA
>A03:5M6M:923851	CACAGTCGCTTCCCATAAGACTTGTTCGTCTACCTTGCTCAAGTCTT
>A03:5M6M:926601	TCAAGGATTACTTTATTTAGTTTCAAAGTCACAAGCATTCTACACCC
>A03:5M6M:926801	AGTCTCTATCACGGGAGCTTCGTGCAGAAACAAAAACCTGTCTACAA
>A03:5M6M:926901	CTTGGCACGGACGTCCAAAGAAACCGCCATCGTTTAGACAAAAGCAT
>A03:5M6M:932201	AGCGAAGACTTTAAGTGTACAAAACCCTAGAACAGAACACGAGAGCA
>A03:5M6M:932351	TCCAAATTGTAAGAGATAGTGGGGACGGAAATCAATGTGAGAGCAAA
>A03:5M6M:932851	GTGTTGTAAAACCTTGGGCCAGAGATTCTGCTGGCTTGTAAATACAA
>A03:5M6M:933151	TTTTAGTGTCTAATGCACTGCCAAATCCATGCATTGTTTCATATAAC
>A03:5M6M:933301	CACTGAAGAGAACCGCAAAATAACATAAAGGACAATAGATGGAAGTT
>A03:5M6M:933751	TACGACACACGAGCCCCGACCATTAACGTAATCATACTTTTTGTTTG
>A03:5M6M:933851	CATTATTTTCAATCCAACACGCACGGGTGGTTCCCACATTTAAATGA
>A03:5M6M:934301	ATAAAGTAATAATAAAACGGCTAAAAATGCAAATCCGTTTTCTCCTC
>A03:5M6M:934501	CAAAAAGAGAGAAGCATCAGATCTAGAAAAATGTGTCTGGTGTGTTT
>A03:5M6M:934651	TTTTGTTTCGTTCCTCTCTGTTTCAAGATTAAGAGGAAGTACTTGTG
>A03:5M6M:935351	AATTTACCATTCGCACATTAAAATGCTTGATGCACATTTATAGCATT
>A03:5M6M:942551	GTGTTGAAAATTTTGTGAGAAATCTCTGATAAAAAGGTGTTTGGATA
>A03:5M6M:943051	AAATCATTTCTCAGTATTGAATCACCATAGTAGCTTCTTTAACCATC
>A03:5M6M:943551	ACACGGAAATCACTCGACGAAAAGCCAAATAAGAGACAGTCGGTCTT
>A03:5M6M:943851	ATCAATCTCCATCCTCCCGTTATTACCGCCACGTGTTTCTCTCCATC
>A03:5M6M:944101	AAGATGCGAAGAAGATTCTCAAACGCAAAGACAGTGACGCTGGTGAA
>A03:5M6M:944351	ACTTCTTTGTTGCTATTAGCATTATCTTCATGAACAAATGGGTAACT
>A03:5M6M:944551	TCTCAAATCATTCTCCCTTCTCCCCGCTCCACCTCCTTCCTCCAAGT
>A03:5M6M:944751	TGTTTCACAGTGTTGGATTCTACCAGATGGCGAAAATCGCTGTCACG
>A03:5M6M:945001	AGTTGCACTTACAGTTGTATCAGTGGGAGTTGCGGTTGCGACTGTAA
>A03:5M6M:945251	TTAAACAGGTTGATGTGGAAGACAACGCCGATCACTCTCTTGTTTCT
>A03:5M6M:945501	TGTAGAGCAACTTCTGCGATCACGCACGTTGTCTTGGGACAGTTCAA
>A03:5M6M:945701	TTCTCTTTTGGACAAGAAGTCAAGATTCAGTGAGCTTAAGGATGATG
>A03:5M6M:946451	GAATAGGGAAGTGTCAAACTAGGTTGGCAGAAAAAAAAAAAACTAAT
>A03:5M6M:946951	TCTACGAGCAGCATTATAATCATGAGGAATAATATTAAGATGTATGG
>A03:5M6M:947301	GGTGACTATAACATGCTCATGTCTGATCATATCAAATTTGAAACAGT
>A03:5M6M:949351	CGATTCGCTCGCATACAAACGAAAATAAGATAAAAGAACTGCAAAAA
>A03:5M6M:949701	ATTGCATGGTCCATCCACCTAAGCCTGACCTGGATGAATTAGTCTTG
>A03:5M6M:950001	AAACATTTCAGACCAAGGAAAACCGTAAACAGTTAGATTTATGGAAT
>A03:5M6M:950101	TCGATCAGCTTAGTATGACAAATCAAATAAATATAAACTTACGCAGT
>A03:5M6M:950351	ATGGCGACATGGAGGAGACTGCCTCGAAGACCAATTGCAATTGAGGT
>A03:5M6M:950451	CCACTGATTTTCCGCATGCAATTATCTTCGGTTGCAATGCCATAAAG
>A03:5M6M:950851	ACGGTAAGTACTTACTTGAAGGAGATAAGGGACCAGGCAAGGCCAAA
>A03:5M6M:951101	CCACATGCGCTTTTCTTCCGGGTGTCATGTTCTCTATCAGATTGTGC
>A03:5M6M:951301	GATGCCCTATTCAATAAAGTAATCCGATCATAATATCAATTCATACT
>A03:5M6M:951601	GCGCCTCTGGTAATAGCGTTCCTCGCGTGGGCTTCAGACACCGGAGA
>A03:5M6M:952251	CTGTCTGGTTAAAGCTCGAAGCTCTCGGCGTTGGCTCTCTAGACGAC
>A03:5M6M:952351	GGAGGAGTTAAGTCCTCCGCCGTGGGATTTGTTGAACGATGAGATCA
>A03:5M6M:952451	CCTATCTCCGCATCGGTCTGATTAATAAAACGATGTTTTGAGTCACT
>A03:5M6M:952751	CATTTGTGTAAATTATCCGTATACCTCGAGGGGTTCACGGCCATTGA
>A03:5M6M:952901	GAGCATTAGTGTATACCATATAATACTTTGAAGCACCACGATTTGCA
>A03:5M6M:953701	TACGTCATACATGTCTTTGCCGGTGATCATTTTGATTTATTTCCCTG
>A03:5M6M:954301	AAAGAAACAGGGAATCTTGTCTTGGGATAAGGAGGATTGGTCTATAA
>A03:5M6M:954501	CGGCGAAGGTTGATGCATGCACATGGTGTTGATGGCATCTACTGAAA
>A03:5M6M:954751	GGACATTGGTGATCGGACCAGATGAATAATTAGCCTCCTTGCTTTCA
>A03:5M6M:956101	GAGAAATTAGGATTGTGACTGATGATGAATCGTTTTGGTAACTGGAA
>A03:5M6M:956251	CAAGCACAAGGGACTAGTGTGGTTACAGAAGAGAAAGAGCTTAACAA
>A03:5M6M:956451	TACCAGAACATTCTAGGCCTTGAGATCAACGAGGCGAGGCCACACGA
>A03:5M6M:956751	TTGTGTGCAGGGATTGCGTATACGATGAGTAAGTCAGGGAGGCCAGC
>A03:5M6M:957101	GAAGTTACAGACAGACATGATGATGATGAACCACACGATTCAAACAA
>A03:5M6M:957201	TGTGATCAAAAGGAGCCAAGAGTAGTAGAGAGGTCTAAGCGCGAACG
>A03:5M6M:957851	TCTCTGGTACTCAGGGTCCATGTAGTAGAGCGTACCGGCGATGATCG
>A03:5M6M:959151	TAACGAAGTTTCTGTCTAAGAGGATGTTTCCTGGCTTGAGGTCACGG
>A03:5M6M:958151	ACCGTTCTCCATGTACTCATAGACAAGGCAGCCATTATCAGGACAAG
>A03:5M6M:959451	TATTTCAGAGATCTTAAGAGAGTTAACGGCTGTTTAGTTTGTAACTT
>A03:5M6M:958351	TAGAATCAGGTTTGAGAACTTTGAGAGCCACCGGGGTGTGATCGAGG
>A03:5M6M:959601	CTCCTTCACCTATTATTTTACGGGAAGAGAAGTTATCTGTGGCTGCA
>A03:5M6M:959751	CTAGTTGCCTCTCGCAGAACTCTTTGGCTAGCATTGATTTTGCTTCT
>A03:5M6M:959851	TCTCAGCATTTCTTCCTTTTCCAGAGCAGTTATGACCCTTCTCGTTT
>A03:5M6M:958851	GTTTGTACATGGAAAGAGTGGTTTCTACTTCTTTCCTTAGCTGCGCT
>A03:5M6M:960201	GTTAGCTCCAGGATTCAACTGCATTTTATTACCGGAGACAAGACTAT
>A03:5M6M:960401	ACAAGCCTGTCTTATCTGAGCGTGTGCGGCTGAAAGTTTCTGTATAA
>A03:5M6M:960551	TGCATATACATACCTGGAGATAACTGATTGGTTGATTTGGTTAATAT
>A03:5M6M:960801	ATCACTCTCATTCACATTAAACACTCAATGTGAGGCTTTTAATACAC
>A03:5M6M:961051	CTAGAGGAGCAAGAGCCAAGCACTAAACACTCAACCTCACTATCTGA
>A03:5M6M:961601	CGCCGATCGATTCGAAGAACTTGTTCGACATCACCACCATGAAACTT
>A03:5M6M:962101	GTGAATTTTAAAATGACACTATGACTAGCAACTCTTTTATAAAGGGT
>A03:5M6M:962201	GTTCTAAGATTCTGTCTGTGATGCATCGAACATATACTTGTTCTTAG
>A03:5M6M:962651	TGGTTCTGCCTTGGTTTCGCTTGCCATCGCTCAAAAGTCTGCACCTT
>A03:5M6M:963401	TTGCTTGTTTACTCAACGACGCTCCAACAGTCAAATATCTAAAGCTT
>A03:5M6M:963551	ATGGTGCCCATTACAATGATCCGATGGTCCTCTGGAAGGAACCAACA
>A03:5M6M:967751	TCTCCTGATGTTAACGTTGATCCTAGAAACCCTTGCCACATCCTGAT
>A03:5M6M:967901	GAAGAAAGTGTGGAAGAAGCTCCTAATGCCTCCGATATCGAGTTGAA
>A03:5M6M:968001	GGCCATAATGTATCCCAAGCTGCCCAACAAAAAATGTAAGTTTATAA
>A03:5M6M:968201	CTGAATAGCCTGTTTTGAAAGAAAGTTATGTCAGAAAATGGTGCAGA
>A03:5M6M:968351	GAACCACCTACTGGGATATAAGACCATTCCTGTAGTTCATGCTCAAA
>A03:5M6M:969201	CCTCCTCAAGAGCTCCTCGTGGAGTAACCGTCGATTAACTCTTCCAT
>A03:5M6M:969951	CTGCATTTGAACGAACATAATCTCCGAACCACCAGCTTTCACGAAAT
>A03:5M6M:970151	GGGAGGTCCGAGAAGGAAAAGCTGTGACCGCCATTGCAGCGAAATTG
>A03:5M6M:972001	GCAGCTCCTCAGACGTTACTCTCCTCGATGATCCTGCTGATTGTCCG
>A03:5M6M:972201	TTCTCCTTCTTGATGAATCCATCGGTGGTCTCCCTCCATCTTCCTCT
>A03:5M6M:972351	CCTGGAGGCAAACCCGAACTGGTTCCAGCCGCAGGGCCACGTGTTGG
>A03:5M6M:973501	AGGACAAGAGAGATGTACCATTTGATCAGCAAGCATGAGGACGGACT
>A03:5M6M:975151	AAAACAAATGTAAGCAGCAAAGCAAGAACTCACAAGCTTGATAGCGA
>A03:5M6M:976101	TTGGGTGAGCGGTAAAGGTCGTTTGGCACGTGTCTTCCATCCTTCTA
>A03:5M6M:977601	TGTTCCATTCCAAGGAGAAACCTCATCATCACAAAGAAACTCATGGA
>A03:5M6M:977701	TGTTTTCGAGAGAGCCAAGGAAGAGATAGAGGCTGTCATCGACACCA
>A03:5M6M:977801	TCTGTCTCACCGGAGAAGGAGAGAGCTGGATTCGGATGCTCTCTTGG
>A03:5M6M:986801	TTACTATTCTATAGGCAACGGTCCCAAACAATTCGTAGGTTTTGGTA
>A03:5M6M:987451	GTATTTAATTACCTAGTGATTTACGGTGAAAAGCAAAGAAGGATAGG
>A03:5M6M:987751	AATTCCATAATATTAATTACTTAGTACGATACCAGACTGGCATACTC
>A03:5M6M:988201	ATATTTTATTCCTTGTGCCCTAAAGAACATCGTATCAAATGGGACCA
>A03:5M6M:990351	GAGATCAAGGTAAATGCTTCAATTTTAGAAAAACATAGACTTGTCAA
>A03:5M6M:991051	TATATTCGAACCATCTTCTTGAACTTCTAACGTCTTGCTTGGAGCTT
>A03:5M6M:991201	TGTTGGGCAGTAGCGATAGTGAGAGTGGTTCAAGCATTATTGAACAT
>A03:5M6M:999351	AACAAAGGGGACTCCAGGATCAGCTCCAGTTCGACGGAAAACAAAGG
>A03:5M6M:999801	TTCATGCTCTTTTCCACGTTTCCACAGTTTAGCTTGATAGATTTTGG
>A03:5M6M:999901	ATAAGACCACTAACAAATTGGAAATTCGCCTGAATGTGCTCCACCAA
>A03:5M6M:993751	TCATCGTCTTCCAATTTTCTGCTCTTGAGGTCGCGCTTTTTGATGAT
>A03:5M6M:995201	CACGCTTACTCCTTTGGTCACACCTGAAACTCTCCGAAATTTTCTAC
>A03:5M6M:995401	TTTCAAATGAAAACGCAGCCAACTAAACTTGTATCACACGCTGGAAA
>A03:5M6M:992751	AAACATTAATGTAAACGAGATACATCCGCATTTTTTTTTTCTCACGG
>A03:5M6M:996751	TCGATGCTCCTTCGAAAGCTCCATGGTACCTCGCAATCTTAAGAGGA
>A03:5M6M:995651	TTTATCCTAATCTTTTCTCTTAGGGAACTATGCTATCAGGATCAAGA
>A03:5M6M:993001	TCACATAGCATGGGAGAAGGAGGCTCCACTTCAACAGAAGCAATCTC
>A03:5M6M:992851	GGGAGCCGAGGATCATCTTCAGGACCAGCTCGGGCAAACACTACAGC
>A03:5M6M:999651	TTCAACAGAAGCAATCTCTGCACACACAGAGACACATAGGTTAAGAT
>A03:5M6M:993351	ATTCTCTACAGAATCATATACATTCAACAAAGGAAGCAAGATCCAAA
>A03:5M6M:996801	ACGTTAACCTCCGCCAAAACAGAGTCCTCCATGATCACAAAAACCCT
>A03:5M6M:962901_(reversed)	ATCATCACATTGTCATCTCTGGTTTTGTTTATAACCAAATCTTCAAG
>A03:5M6M:962801_(reversed)	CGATAAAAGGTGCAGACTCTTTAGTGATGGCAAACAAAACCAAACCG
>A03:5M6M:963601_(reversed)	TGTCTCCATTCCATGATCTCTAGATGCGTCGATAAACATTCCGGAAC
>A03:5M6M:963301_(reversed)	GGGAAGGTAGTGCCACTAGGATATGGTGTCTGCAATTGAAATATGCA
>A03:5M6M:963151_(reversed)	AGGGAGATGACGGATTGAGGTAAGAGACCCTATGAAGTTCTCAGACT
>A03:5M6M:925751_(reversed)	TCTGTTATCGAGTCTAGAAGCTCTTGAATGGGTAGGATATGAAGGAA
>A03:5M6M:42251	TTACTCTGGCTTGACTTCGTAAAGGGTTAGAATTTAACGGCAGCCAG
>A03:5M6M:40501	CTCTATGCTAAAAGATAAGGACGATGACACATCATTTAACCTAGATT
>A03:5M6M:40701	TTTAAGGGGAAACTTAGATGAGGATCAATCATTCCAGTTGGTTAAAG
>A03:5M6M:30451_(reversed)	AACTCTATAAATACTTCTCTTTCCACACCAAAACCTCAAACTCTCTA
>A03:5M6M:42651	AGCGAAATCATTTCTTCTCCATTTTATCCTCTTTATTGTCATTTTCT
>A03:5M6M:25751_(reversed)	TAAACAAACCCTCAAACTGCTCATCGTCTGCAAGTTTAGTGAGCCGT
>A03:5M6M:57801	TACACTAACCGGTATCTTGAGCCGCTGTGCAGCGTTCTTTTGCATGG
>A03:5M6M:59201	TCTTCTTCTATTAACCTCCTTCATTACCATTACCTCCCTCCTTGTCT
>A03:5M6M:58851	ATCTGCTCCATCATGGCCATGCCCACCACAACTCTCCCTGGCTCCAT
>A03:5M6M:60151	GAGAGAGTCCAAAAACATCAGCTTCCTTCATCTTCTTCTGTTGCCCT
>A03:5M6M:61251	AACAAAGACTTTGCATTTCATCAACAAAGCCATCAAAGGTGATTACG
>A03:5M6M:61351	AATCCTCGGTCAGTTCAACAAGAAAATAAGTTGCAAGAGAATACTAA
>A03:5M6M:61801	GTGGACAAGGCAACATCCGGTTTGTCTAAATCCATGAATCTCGTGTC
>A03:5M6M:63151	ACGGCGTAGAGATGGGATCTCTGGTGAAATGGGTTTGCAACCAATTA
>A03:5M6M:66701	TCAATCCTCACCGTAATTGGCTACAAAGCTCAGACCGACGCAAATGC
>A03:5M6M:68251	CTAGATGAACAAACACCATATGGACCTATTCTATAATCATTTACCAT
>A03:5M6M:80601	GCTTGAGAGGAACATGCGATGAGGACAGCGACTGCGACACCCATTGC
>A03:5M6M:84601	GAATGCTTGACTCACCTGTTTAAAAAAACACTACAAGAACACTCTCA
>A03:5M6M:87901	TTCGACCTAAGTGAGCTTGTGGAGGGCGTTTTGGGGAAAACCTACCG
>A03:5M6M:88051	TGCAGGTTTAAGCCTCATGAAGAACCACTCTCTGCTGATATCTAATG
>A03:5M6M:90501	ACCGTGAATATCACCTCCGGTGTAACCAACACCACCGTCTCCGGCAG
>A03:5M6M:90601	CTCAACAAGTTTTCGACCCTCGTCCTCCTGCGCCGGCTCCGGCTCCT
>A03:5M6M:90751	GTGCCGTGTTGGTTTGCGTTATTAGTATATCGCTTGCATGGTTTTAT
>A03:5M6M:93251	GAGAGAGAAGCAAGTGCTGCGTGGATGCAACTGGCTGCAGCGGTGGT
>A03:5M6M:93401	CTGTGAGGATGGTGGTGGACTTGGGCATGAACTCACCGCAGCCGTCA
>A03:5M6M:97351	ACCTCCACAAGTCCGGATCCAAAGCTTAGATCCGGATCCGGATCTCT
>A03:5M6M:111151	AAATCCTACGGTGACTGGCCCGATGGATGCGACCCATTGCTTCAGTT
>A03:5M6M:141751	GCCGCTTCCAGCAATACTGGAATATAAACTCCAATCCCTGGAGAATC
>A03:5M6M:142001	TGACCAAATGCCTTTTCTCAGCTGGAACCTTGGTATCTAGTGGTCTC
>A03:5M6M:126251	TTGAAATCTAACATGACATTAGAAGCTTTTTTATCGCGGTGTAACAC
>A03:5M6M:142301	GGTAGCTCAGAGCAGATGCAATATCCTTCAAAATCACAAACCTCTGT
>A03:5M6M:126451	CTGTAGTATCCAAGAAGAGGAACCAAGTTTCTGTGCTTTAGACTTCC
>A03:5M6M:143051	GTAAAGATCTTTCATAATCCACCCATACCTGTAAAGGCTCTTCACTT
>A03:5M6M:143151	AGCAGACTCTATAGACCTGAGGCTGTTGATGTCTATACCGACATGAT
>A03:5M6M:143301	GTACTGTGTTGGATCTGCATGTGTGAAATCCAAGGAGGAAGATACGA
>A03:5M6M:143801	CAAATGAAATGGAACCATGACAGTTACCTTCAACCTTTATTTTATGT
>A03:5M6M:155751	ACTGGGTTTTGAGATCCGGGTTGCAGTACGGTGTGGATTTCGTGGCG
>A03:5M6M:155851	TGGTGACAGTGATCGGTTAAGAGTGTGGTCTGATGTCCATTGTGCTG
>A03:5M6M:156851	TCCATTCTCTTAACATTACGGTAAGCCGCATAAGCGATCACGTAGAA
>A03:5M6M:157051	AATCATATCTCCTCCTGGAATCCAAACCGTCTCGTTCACGTACGTGT
>A03:5M6M:158801	AGGACTAAGCCTTCTGAAGTTAAACATGAGTGGAGTTTCAGGAACAC
>A03:5M6M:158951	CGAATAATCACCGAGATAATAATCAAGATACCTCCGGTTCATCACAA
>A03:5M6M:158001	TAAGCAAAGATGATGAAACCGATGAGAGCAGCTATAACAAAGAACAT
>A03:5M6M:159101	CTTGTTACCGTAACAAGCTCCGGCGAAACCGGCTAAGGAGACAACCA
>A03:5M6M:159201	GTGGAGTTAGCTCGGTTGCTAAGCCATATTCCACCGCCGAGGATGGG
>A03:5M6M:163301	CTGAGTTAAAGATTGCTAGATCCGAGATAGATGAGCTGAAGGCGAGG
>A03:5M6M:166351	TTAAACCCCAAATAAAATTGGGTTTTTAAGTTGAACTACATCAAAGC
>A03:5M6M:168101	TCCATCTATTTGATTCAAGATGGAAAGTGACCGTACGATGATGGATG
>A03:5M6M:168201	TTTGTACTGTAATTTCTGTTTTATGTCCCAATGGTCCGCTGAGTTGT
>A03:5M6M:169551	TAACTGATGATCATTATGTTTCCCTTTAGACCCTACCTACTTGTGGC
>A03:5M6M:170251	TTGCTTTAAACAAAGTGACAAAACTGGAATGTCTTGGGAAACAAAAA
>A03:5M6M:173501	GCGGTGTATCACTGCACTCTCTGTATATCGCATCTCCATCAGACACA
>A03:5M6M:173801	AGGGAGGGATCAGTGAGATGGCAGAGGAAGTGTGGACCGTGGATAAG
>A03:5M6M:197201	TAGAACCTTGATCACACTTACTACCAATCGCAATATCAGGACGGTCA
>A03:5M6M:197301	TACAGTAGGGTCATCTTCTACACCTTCCTCTGAATCGTCAGACGAGT
>A03:5M6M:197401	GAACTGGATAACCGATTGCTAGGAGAATCTCTATCAGGTGAGGTGGC
>A03:5M6M:197801	GCAGGAAGAGCAGTCGATTTGCTAGAGCTCCCACTCCCACTAGGTGG
>A03:5M6M:198201	TGATGCAGAATGTTTGTTGCTCCGGTGATTTGCTGAACTCTACTCCT
>A03:5M6M:189201	GGAAGATATGGCCTCATCTTTTGTGAAACTATCCTCTTGTGAACCGA
>A03:5M6M:198751	GAAACTTACTTCAGTGATTTACCATCCAAGGTAAACCCATGAACGGC
>A03:5M6M:190051	TTGACTTTTGAGTCTTCTTGCGCTCCATGTTGGTTTCAAAGGCCAGA
>A03:5M6M:190251	GCAGGACAACGCCCTTCTATCTGATCTTTCTCTGCCATGTCCACTAT
>A03:5M6M:191201	CGAAGCTGGAGATTTGCGAGCGAAACAGAGAAATTGGATGGCTGTGA
>A03:5M6M:202051	ACTAAGAGAGTTGTTGCAGAAACAGAACCAATGCGGTGAGACCGCGC
>A03:5M6M:202201	TTTCCACATTGCTGCTAAACAAGGCGAATTAGGTATGAAATTTTGGT
>A03:5M6M:202851	CCTTGATGTTGTCGTTGAGCTAATGAAAGGGCATCGGTCCTCGTTGA
>A03:5M6M:203251	ACATCAAACACGAGGTTCACGACCAGCTAGAACACGCTCGAGAGACA
>A03:5M6M:203701	GTGAGGACGAGAGGTGGCTAGCGGTTGGAGTAACGGTGTTTGGTGCG
>A03:5M6M:203801	GATTGAGGCTTCGAATGTAAGAAGCGCGAGGAGAGAATCAATGGCAA
>A03:5M6M:203901	TATGCTATTTAGTGATCAAGAGACAAAGAGTATGTGTTGAGTTAACG
>A03:5M6M:208301	GTTAAAAGACGCGGGGAAGTTTTGGGTTTCATACTAAGCCCAAATGT
>A03:5M6M:210751	GAATGAAGCACAAATCATCAGCATTTGGGCAAGTCTGCAGGAGGAGG
>A03:5M6M:212251	TGTGAGCATGGTACCACAGAGTGCCTCTTTGGCCAACAACGGTGTAG
>A03:5M6M:231101	CGTCACAGCAAACTTTAGGATAAAGCATATCAATCTGGTAACAGAAG
>A03:5M6M:235051	GATTCAGAAGAAGCAGCTGCAACTGCCTTAGCTTCCATGGACAATCA
>A03:5M6M:253901	TTGAAACGAATGAAACTCTTTCAAACACGTTTTACATGTGAAAACGC
>A03:5M6M:250901	TACCCTTGTGACTTGGTGGATAAGGAAGTGGCTGGGAAGGAGTGTGG
>A03:5M6M:254301	CGAAGATGCGAGTTATGTGGTCACGACTTGCGACACCGCGTAGCTTT
>A03:5M6M:251601	GACTTGGTGTAAACGTGGGAAGCAAGAAGAGGAGATAATTTTAAAAA
>A03:5M6M:279351_(reversed)	TTCTAGTACATGTTTCACGCGGTCTAAACTTGGTTAAGTAGTTGTTT
>A03:5M6M:279251_(reversed)	TTATTGAATAATCAGTTAGATGATTCGGGTCAAGTACAAAAAGTCTA
>A03:5M6M:278301_(reversed)	GGTAACAGTCGCGAATCCCAGCTACAGATCGTGGACCTCACTTCATC
>A03:5M6M:277601_(reversed)	TGTTGAGCGAAAAACAGGAAAGCGGTTCCGTTCCCTTGTCTCCGTTG
>A03:5M6M:281851	CACCCTGTCCCTTCCAAAGATTTCAATCTACCTGATGGATGGATCGT
>A03:5M6M:282051	GTTCCGTTCTCTGCCTGCTGTTGAGACATACTTGAACGGTACAGTTG
>A03:5M6M:277201_(reversed)	TAGAGGTACTTTGTTGAACCGGTGGTTTGTACCGGTTTGATGGTGTT
>A03:5M6M:277001_(reversed)	GTCCAAAAGACATGGTCTGAGGCTTTTGTCTCATTGCTCCAAGAACG
>A03:5M6M:286951	GATTTTACCACTTAAATGATTATATGAAATTGTGATCTGCGTACACT
>A03:5M6M:287501	GGCAAGGTTTCAGGATGTCGCTAGAGAGGAATAATCTTCTCTCTTTT
>A03:5M6M:287901	GGAATTGAAGGGGGAAAATCTTACTTAGTGGACTGGCCATAGAGGAA
>A03:5M6M:288001	ATCTCTTTAGAATTTTGGGTCCTCCACTACAAAGACAACTCCCAAAA
>A03:5M6M:272251_(reversed)	AGAATTTTATAATCGCTACTGGACAATGGACAACTCAAGAATATGAA
>A03:5M6M:289101	CCAGACCGGAACTTCGATGGGGTTGGATACTTGGATCCACGAGTTTT
>A03:5M6M:271701_(reversed)	CCGGAACCTTTTCAGTGCTTGGGTATATTTTTGCTTCAACGATATTT
>A03:5M6M:289601	ATTACAAAGCCAAACCAAATCAAATTGGCCTTTCTCATCTATATAAC
>A03:5M6M:269651_(reversed)	TGTCTCCAACATCCTCATCTTCAAACTGTTGCTCATCATCAATGACC
>A03:5M6M:291301	TACTACTCTGAGCAAAGCTGTTATTTGGACTTCCCTCCTCTGGCTTC
>A03:5M6M:292401	TAGAGCATAGGTATATCTTTCATAATTTGATTTTACCTGCTTACCTT
>A03:5M6M:292851	GGGATGACTGTCAACAACTGAACTATTGAGATATCTGAATGGAATGG
>A03:5M6M:293701	GATTGGAAGAATCCACTTCATTTTGGCTACTGTTGGACCAGATCATT
>A03:5M6M:266901_(reversed)	AGCAAAGCTGGCAGTGTGATTCTACGTTCACGTTCATCTTTTCAGGT
>A03:5M6M:294051	TGTGCACTGTCTAGATGAAACAGTGATGTTTACTCTTGTCTTAGCTG
>A03:5M6M:296201	TTCCCTGTCCAAACTCTTGCAAAATGTGCCAAAATGATACCAGTAAT
>A03:5M6M:263051_(reversed)	GAACAACAACAAAAAATCACAAACTCAACCGCCGCCACCTCCAGAGC
>A03:5M6M:259201_(reversed)	TACGTAGTTTCATTCAACTCACTATTGCTAAATCAAAGTCAAACGGT
>A03:5M6M:258751_(reversed)	TAGATTCAGATCGATACCAGTTCAATATGTTAAACTCTATGATCGGA
>A03:5M6M:258451_(reversed)	GTAGTCTTTTTGGTGGACTATCCATAAGTTCAACAGGTTATTTCGAT
>A03:5M6M:258201_(reversed)	TCGACTGTAAGTTCCACCCGACTCACGTGCTACTTTTTGAATCATCT
>A03:5M6M:257801_(reversed)	ACATCACGTTAAGTTTTGTAACTTGCGTTTCATTCGATGAATGTAAG
>A03:5M6M:310701	GTTAAAGTCTACAAAACAGTACGGAGATCGATCGTGGACGAGACGCT
>A03:5M6M:311851	GGTTTAATGTCAGGTATACCCCTGAAGATATTGGAAACTACTTGTCG
>A03:5M6M:312451	TATGTATTCATTAATGACTTTTATTCGGAGACTTGAGATACGGAACC
>A03:5M6M:314301	ACTAGAGACATTGTTGTTGTTTCTTGAGCGAGTTAACTTTGCTTGGT
>A03:5M6M:316401	ATATGCAATGCTTGGATTCAGATAGGGATAGGAGAAGCTGCCACTTA
>A03:5M6M:317001	GGCAAGCGGGACTCCTAAACCTTGTTTCCTCAAAGAACCTAGAAACA
>A03:5M6M:317301	CGCCACCAGTATGGTAGGAATTCCCCAGCATAGACATGACTTGAGAT
>A03:5M6M:331001	AGAGTCCTCCCCTGCCTCTTCAGAGCATAGACGACGTCCATGGCGGT
>A03:5M6M:333801	ACCTTGGAAAGATCTAGAGAGTCCAAAATCAGCAAGTTTAGCCTTCA
>A03:5M6M:335101	ATGAGGTGGGGTTTTAAGAGCATAAGAGAATATCTTGATAGAAACTT
>A03:5M6M:335801	ACAGTGTAGACTTCCAAAGCATTAAGTAGAGGTGGACGAGTTGATCT
>A03:5M6M:333501	CACCTGCGTTAAGCTTAAAGCCAACCCATTGAGTTATGTGGGAATTG
>A03:5M6M:333601	CCCGAAACTATAGACATCACTCTTCTCACCCAATCGACCTGAATGGT
>A03:5M6M:349351	AATCTAACGAAGCCAGTACAAGAATGCACCAACCTTGCGTCCACGCA
>A03:5M6M:357101	CTGCATTTAAGGAGTTTCAACTTCCCAGTGTTATCTTCAGTACTACT
>A03:5M6M:357501	CAAGTTCCGGTTTATCCTATAGGCCCACTTCACATTGCAGCTTCTGC
>A03:5M6M:358051	AAGAAGGAGCAGATATGAGGAAGAGAGCCATTGATTTGAAAGAGAAG
>A03:5M6M:365551	AGCTTTCGATGAGACGAAAGAAGGTGTCAAAGGGCTGGTTGACGCTA
>A03:5M6M:365951	AACTGGAGAGATTCTTTCGTTTGTTACATAGCTCCAGATCCTCCAAC
>A03:5M6M:366251	ATTGGAATCTGAGACCCTTAAGAGCAAGGAATGCTTGAAGACTTTGC
>A03:5M6M:382001	AACACTCAGACAACTCCTTCCTCACGGTTCTTCTTCAAGACAACATC
>A03:5M6M:366601	ATAGGGTGCTTGCGAATAGACAAGGACCAAGGATTTCAGTTGCAAGC
>A03:5M6M:382351	TATCTGAAGAAAACCCTCCAAAATACAGAGACATTACCATAAAAGAA
>A03:5M6M:378251	CGATGCAAAAATCACTGAAGTCCCTCGTATCTTCCATGTCCCCAGAG
>A03:5M6M:369951	CAGTTTATGGACCAATGAAAGAGCTTCTGTCTGAAGACAACCCTCCA
>A03:5M6M:366751	AATACACAGATGGATATTTTGAGAAAGGTCTGGATGGAACATCGCAT
>A03:5M6M:369101	GATCCTCCAACTCCCGAGGAACTCCCAGTGACTTGCAGGTTACGGAA
>A03:5M6M:379001	TGATGAGTTTAGGTAGTTTACTCTTTGAGCTTCTCTCAGAAGCACTA
>A03:5M6M:381751	GGGGGTAAGTAAACACTCAGACAACTCCTTCCTCACGGTTCTTCTTC
>A03:5M6M:366451	CTCTTCCTGGATCTCTCGTCATCAACATTGGAGATTTCTTGCAGGTA
>A03:5M6M:382051	GGTCTACAAATTCTTCATCAAGACTCTTGGGTTGATGTGGCTCCTCT
>A03:5M6M:389801	TCAGCTCAAGTGCACTCCCTAATTCAACAGTTTATGGACCAATGAAA
>A03:5M6M:393001	TGCATGGAGGATCCATGAGGATGAGCTAGACTAGGTACGTAGCTGCA
>A03:5M6M:393151	GTCTCGTCGTTTCTATCGACAAAATAACTTATAGAGAAGCGACTACG
>A03:5M6M:393301	TGTCTCACCCATATGGATATCTTCCTTGTTAGATGACATTGCTCTAA
>A03:5M6M:393751	CATCGTGTCTCTTTCAACATCGGGTTCCATACCAAAAGCTGGTTGTC
>A03:5M6M:394051	GTGTTCCACTGCTTGCATACAGATCTGAATCTTGCAAGTGATTTTTC
>A03:5M6M:398251	GCTAGGCTAGGCCTAGAGGACTGCTTTGAAAGGATCATATCTTTCGA
>A03:5M6M:412801	GTGTTCCTGGGTTTCAAATTCGGTTTAGGTGAACCGAAATCGAATAA
>A03:5M6M:414001	ATTCTGCCTTCGCAATCCACATCTGTAAAAATTTCAAACACAACAAT
>A03:5M6M:417551	TGCCATGAATTTTTCTAGTTCAGACACCACAAAATGTATACAATTTT
>A03:5M6M:419951	GATAATAAATAGACAGAGCCAATGGTTAGACAACCGTCGCCCACAAA
>A03:5M6M:421351	CGAGACCAGAAACGGTCTTTGCAGCGGACTGTAGGCATTTGCATGCT
>A03:5M6M:422301	TTCTCCCCTCCGCAGCTCCAAGTTCTGTCAGGTGAAAAGTTTGTAAC
>A03:5M6M:422901	CCAAGATTCGAGCTCATTCGTCACGGTATGAGACTCAAGACTCATAT
>A03:5M6M:423351	CCTCGGAGGTCTATGGAGATCCTCTCATCCACCCCCAACCTGAGAGC
>A03:5M6M:423451	GCGTGTGGCCGAGACGTTGATGTTTGACTACCACAGACAACATGGCA
>A03:5M6M:423751	GTCTCATGGAAGGAGATGATACTGGCCCTATCAACATTGGTAACCCA
>A03:5M6M:424051	ACACACCGGACGATCCAAGACAGAGGAAACCAGACATAAGCAAGGCC
>A03:5M6M:425001	GCTAGGAGTGAGCAAACATTCTCCTATATTTTAAAATGGTAGTGTTA
>A03:5M6M:425451	TAACCGTAACATTACCATCACAAACAATCAACTCATTGTTAAGTATA
>A03:5M6M:427601	GTGCTAACCGGTGAGAAGTTTGTGCTCTCTACGTTAAGGTTTGATGT
>A03:5M6M:427701	AGGTCGAGATGGACGCTAAGAGATTGTATCAGGCTGCGTGGAATTTC
>A03:5M6M:427901	CAACTGTGTGATATTTGTAACCAGACGCTCGAAATTTACCAACAAGA
>A03:5M6M:430151	GATTCCGGAAAGTTCGGCTTCCGAGCAACATGAAACCGATGCCATAA
>A03:5M6M:430251	GACTAGATAAGCGATGCCGGTACGGAGGATGTACACGACTGTTTGGA
>A03:5M6M:430351	GAGTGGCCAAGCCATTCGGTGAGGAAGGCGAGGAAAAAGACAAATAC
>A03:5M6M:436551	GAGAAGCTTGTGCGAAAGAGAGATATATAAAGAAGGAAGAAGAAGAC
>A03:5M6M:438201	AAAAAATATTGATTTGTTTCCCGATTCTGCAACGTTTTACTCGATAA
>A03:5M6M:455201	TCGACCTGGCATTGGTATAAGCTTCATTCTCTTACAAAACGCAGTGC
>A03:5M6M:445601	CCTTCACAGGGAGCTACTGTGTAGCAATTATAATCACTCTCTACTCC
>A03:5M6M:450551	CTTTGATGTGTATGTAGAGTTCGGTGTACCAACATTGGTGACTGTTC
>A03:5M6M:452251	GCCAGGTTACAGACTTTGTAAGCGGCGATTCTAGAGGCTGGGACGCC
>A03:5M6M:452701	CCAAAGCCTTTGTCGGAAAAGCTTTGAGATTCAGGCGTGATCCCACT
>A03:5M6M:466501	ATCATCTTCTTCTAAGCCAGATACAGGTAAACCCTCCATTTGAGCCC
>A03:5M6M:466601	TAGGGGAAAGATATATTGCACACCAAGATCTTTCCCTTCACCAGAGA
>A03:5M6M:466801	GCATTGGAGGCAGAGGAAGCAGCAGATTTTCCGTACACCAGGGGGAA
>A03:5M6M:467051	TGCTAAGCTCGTGACAGAGGCTATATTCGGACCAGTGTTCCCAGCCG
>A03:5M6M:467201	GATGTCAACACCGTCGGCGATAGCGTCATCGAACGCGGAGAGTAGGA
>A03:5M6M:467951	CACAGAAGGATTCCGTTTCGTTCCTTTTCCTTCCTTTAGCCCCATGA
>A03:5M6M:468501	CTTGAGAAGGAAGTGAACCCATGTAGACGATATACTCCTTAATGCAA
>A03:5M6M:470351	TTAGGTTTGCTCAATTACACAATTTGAATTTCGAATTGAGCAAGATT
>A03:5M6M:473401	GGAGACTACGTGGACCGCGGGAAGCAGAGCTTGGAGACGATCTGTCT
>A03:5M6M:473801	CTTACACGTTTGGGCCTGACAAAGTTGCTGAGTTTCTGATCAAGAAC
>A03:5M6M:476251	GGAGCGCAACATGCAATTACATCCACGATTCTTTGGTCAAAACCTTC
>A03:5M6M:476551	CTGGAATAGAAAGCATAGGAAAAGGATTGATCCGAGACGGGACTCCT
>A03:5M6M:490451	GAAGCTGATAGAGTTTGCTCTGGACATTGCAAGAGGGATGGAATATA
>A03:5M6M:490701	AGCTTTGGACTCGTTTTATGGGAAATGGTAGCTGGAGCAATCCCTTA
>A03:5M6M:491051	AGGATCCAAGGAAAGGTCTGAAACATTGGATTCAGAAACTTGGTCCG
>A03:5M6M:495951	CTTTCTGGTAATTATCACCTTCACCTTCAGACTCAACAACCCCTTTA
>A03:5M6M:511351	GTCATTAGACCATTCATCAAGCCAATCAACCGTAGTAGGAGGTGAAC
>A03:5M6M:514001	TTTATTCTCGAAGCAAAGATCTCATTGCTAGGCTCATTTCATATTAA
>A03:5M6M:515301	GTTCTTTTGGCTCGTCATGAACAACTCTGAGGTGGAGAAGAAGATCG
>A03:5M6M:517251	TCATGAACTCAGATGATGAAGACTGGTTCACTTCACCAGATGTTTGG
>A03:5M6M:518201	TGCCCCCATTAGGGCTTCGGCCATGAACGACCAAGTGTTTCTCCTTC
>A03:5M6M:527801	TTGGAGAAACGTCGCCAAGAAAATGCAATCACTTGGCATTGATGCTT
>A03:5M6M:533751	CTGAAGATGAAATGCTCAGGTTCGTGATCCAAGTGCAAGGAGAAACA
>A03:5M6M:535001	AGTTCACTCAGAGGAATATTCTGAGGATATTTCCCAAGGCTACACGT
>A03:5M6M:537901	ACTCCCATCTGAACAACCGGTACAACCTTAGCTAGAAGGCGCTTTGG
>A03:5M6M:553001	TTAGCTTACTCTTTTATCATTCTTTGTATTTGTCGACATGACCCTGA
>A03:5M6M:553501	TTCTCTTCAAAACCAGGTGGACCACTTGCTAACTGGTTGTTATCACT
>A03:5M6M:558601	ATAGGGGATGTCTTCCAATAGAAGATACATGCTGATGTGATTGAGAG
>A03:5M6M:555851	TAAGAGAAGCGAAAAGCGCTCCTTGGAGTCCAGAACTGATATAATCG
>A03:5M6M:559501	CTCTCCCCAGAAACCAAGACACGAGAACGCGACGACGCCGGAGATTC
>A03:5M6M:562201	GGATGATGAAATTGCAACTCAAAGAGCCAGAGATTTCTACTTAGGCT
>A03:5M6M:566401	TACCTCAAGCTCTCCAGGATGACTATGGAGGCTGGCTCAACCGCACT
>A03:5M6M:566701	GGAACTGCATGTCAGGGAACTCTTCCACTGAACCATATATTGTAGGC
>A03:5M6M:574501	TCAAACACAAATATATGGTCAGGATTCGTTCTGCCATTATCGAGACC
>A03:5M6M:568651	CCTCTTGATCCCTGGAATGTCTTTGGCTACAACAGTGATACCCATGT
>A03:5M6M:582401	TACAGGCCGAGCACGTTCTAAACCCTAGCTTCTCCGTGTGCACCTTA
>A03:5M6M:583101	AGAGAAGGTGTTGTGAATCTTAACCGACGATTTACGCCACGGCCGCC
>A03:5M6M:586451	AACTTCTAGGAATTGTGGTCTGCAATTTGTTTATGCCCTCTCCACAC
>A03:5M6M:587251	ATGCTATGGATATCAGAGAAGTTGGGGCGTTTGGAGGGAGAGTTGTT
>A03:5M6M:587351	CCGGTCTTAGGCCACAAGCCGCTATCCCAACAGCCGCCTGCACAGGC
>A03:5M6M:588751	CAAACGAAGAGCTCGGAAGTGGAACTTGAAGCTGGATCACACTGTTC
>A03:5M6M:588851	CCCAACTTCCCCTACACCGCCGTTCTGTTCTTGACAGCCACAAAGCC
>A03:5M6M:589051	GTATCTTCTTGCAACTAATCGAAGCACCATCAAGAGCCCCCGACATG
>A03:5M6M:596951	TGGAGGAAAAGTTGGAGCGATGCACCCGCTTTGCCAGCCGATGAGCA
>A03:5M6M:604301	GTGCAAACTTGGGACTAATGGGATTCTTTTACTTCTTCTTCATCACT
>A03:5M6M:607901	CATATCCAACACTCTACCGAGACACGGCTTGTAAAGATAAACCTTAC
>A03:5M6M:622251	TGATCCGGAGAGATCCGGCGAAAGCTGCTGTTCCTGGGGGTGGTCTG
>A03:5M6M:622651	GATTGGGTTGCTGAAGGTGGACAACGCGGCGGTGGGGATGAACGGGT
>A03:5M6M:629351	TTCTTCAGATGGCAAGCCAACGTTGCTGGAGTCCTGGTCACTGAGAG
>A03:5M6M:629451	GGTTCGGTAGACAAAACAATGTATGCAGCACGTTGCAGCGAAGGGAT
>A03:5M6M:630301	CAACGAAAGAACAATAAGCTACGCATGCAAAGTAAAAGCTAAAGAAA
>A03:5M6M:631001	GTAGAATGTCAAAAATGGAGTTTAATAAACTCCCATAAGCTGGTTCA
>A03:5M6M:631201	GTGATCAGGCTGTCAATGAAAGAAACATATCTTTGACTCTTGGATGT
>A03:5M6M:632201	AGCAGTCGATCCTATGAGCTCATGATGCCAATGGTCTGGCTTAGAGC
>A03:5M6M:632551	AGAGAAGGGTATAAGTCTCTATATCACCTACAAGTACCGGAACTATT
>A03:5M6M:632801	GATCCAAAGGCCAACTCTCACCTTCCAGACCTGAGTATCTCTCCAAT
>A03:5M6M:633201	TAATCCCCATAGGAAACATTCAGTGGTTGCACGGAGAAGTGATAACT
>A03:5M6M:633951	TAATTCATCCGAAGCAAGTGCTTTATCAGATAAATTTTGAGGTGTAA
>A03:5M6M:634151	ACCAGAACTAAATTGTCACTGGTCTAATAAGACCAAAAGAGAGTTTA
>A03:5M6M:634751	TAGTCATGACGTCATGCGTAGCTCGCCGGACATCTCTACTGTAGTCC
>A03:5M6M:635251	AAGCATCGAATCTAGAGCTGCCCACATAGCCGCCAAAACCTACGGCG
>A03:5M6M:635451	AGACTTGCTCCTTGCAGCATCTCCTTTGGGTCTACCCATCTCGTTCA
>A03:5M6M:643451	ATGGCTGCTTCTCTCCTCCGCTTATTCTTTCACGACTGTTTTGTCAA
>A03:5M6M:642001_(reversed)	TTGGACGACACTTCCTCATCTATGGGAGAGAAAACGGCAGGCCCAAA
>A03:5M6M:641901_(reversed)	AGAGACTATGCCCAGGCGTCGTCTCATGCGCAGACATTCTCGCTATC
>A03:5M6M:644401	ACCTCTACTCTCGACAACCTCATCAACCGTTTTAGAGCACAAGGTTT
>A03:5M6M:644501	GATGCGTCACTTTTAGAGACCGTATCTACAACGAAAGCAACAACATC
>A03:5M6M:641051_(reversed)	GCTGCCTCTGGCTCTAGCGACAACAATGAAGCCACTCTTGATATCCA
>A03:5M6M:640951_(reversed)	GTCTACTCACTTCTGACCAAGTTCTTTACAGCGGCGGTTCAACTGAC
>A03:5M6M:644801	AGATGGGCGATATCAAACCCCTTACTGGATCCAGTGGTGAGATCCGC
>A03:5M6M:646801	GAAAAAGAAGAGACCTTTGAGAATCTGGAGTCAGAGTCGGAGTCGGC
>A03:5M6M:648051	GTTGTCTGATGTCAATCTCCAGTTACTCGAACTGGAAGCTGCACATA
>A03:5M6M:648401	TATCATTCATGATGTCAAAGGGAAAAGAAACCCTCTTTGCCTTACCT
>A03:5M6M:648551	GAAACATTGTGTTATCTTCAGCGTTCAGCTTCCCAGTGATGGTCATA
>A03:5M6M:648751	CTCTTAGACGCAGGCACGAGGCATTTCCCGATGAACCTCTGTGCCTC
>A03:5M6M:648901	ACAGATCGAAAGACATACCGCAACAACTTTCTTGTAAATCTGCGCCG
>A03:5M6M:653401	GAGAGAAGTTGATATAGGAACGGATCCGTATGAAGTGTTCCAAGATG
>A03:5M6M:655801	CACGCTGCAGTTTCTTTCTGCGCCGAGTCAAGCAGGCTTTGCAGGCT
>A03:5M6M:656501	CAAACGAATCTGCATCTTCTTCTATCAACTTCGCCATCCGTTTCACG
>A03:5M6M:660251	TGAACTTTGAACCTCCAACTTCATGTAGGTGAGCTACACCTTTTGCT
>A03:5M6M:660551	TTGGCTTATAATCTCCATCTGCTGTTCAAACTCCTTCTTTCCAGCTA
>A03:5M6M:661201	TCTTCTGGTTTTGTAAAGCTTCTGGTATCTTCCCGGTGAAAGAGTTA
>A03:5M6M:669351	GAGGCGAAACAAAAGGAGGCACTGACCAAGTCACCGACTGTCATCTG
>A03:5M6M:669501	TGCAGGGCAGCATCTTCATATCCTGATATAAGCAGCAGAATCATCAC
>A03:5M6M:670201	GCAGCTCCGAACTTGTACGCTAGTATACCTGATACCATAGCTATCTG
>A03:5M6M:672551	CCAGAGACAACACTCCTTAACCCCTACCCTGTTTGCCCTGTAAGTCT
>A03:5M6M:682101	GAAGAGCTTGAAGAAATTCCGTTCCCATGTAACGGTAACTGATACAA
>A03:5M6M:686301	AGGGGAGGGGGCGTGACAGAGTCAAAATAAAAAGGTGTGAAACCACT
>A03:5M6M:687051	ACCTATCCGGTCCCATCCCCGACAACACCATCGGCAAAATGATAAAG
>A03:5M6M:688351	TCTTAACTTTGACAGTGGCGCATTGTTGTGGGAAAGCAAGTCTGGTC
>A03:5M6M:688551	TAGCTGCAGAGCAAAGAATAGTGATCTACGAGCACCTAGAGTATGTT
>A03:5M6M:688701	ATGGCTGCATTCCTCCTGTGGTGCACGGGGAAGTGAAGGCTGGAACA
>A03:5M6M:689101	AATGCAGCAGGTGGTTGGACTGCTCAAAGACATTTCGCCCTCATAGC
>A03:5M6M:691401	AGTCCCACTGTTTCTCCACCCGCTTGGATCTACAAAAGAGAATATTA
>A03:5M6M:691701	GACAGCTTCATTTACATTTGTTGCTGTAGCTTTCACCTGGATTGTGA
>A03:5M6M:694201	AGCTGATAATCCCCACTCAGCAGTTCTCTCAGTTATCTTTGCAGAGT
>A03:5M6M:696601	ATCGATCAGTGGCCCATTTAGTGAGATTTTTCTCCTCCCAAGTGCCA
>A03:5M6M:697651	TTCTTATCCCATTACCTCAGAGGAAATAAAATATCTTGAATCTTAGA
>A03:5M6M:699251	GAAGAGATTGATGTTCTTCTTCTTTTCTTTGCTGTGAGATCTCTTTC
>A03:5M6M:699901	CTATGTTGTGCAACCTTCAGATGACAAAGGACGGTGTTGGTATCTGC
>A03:5M6M:703551	TTTCCTTGGTTGCAATACTTGTCTTGGGACTCCTCTTTGCTGCTGAG
>A03:5M6M:706201	CTCAGCATCTTTGCCAGCTTCACCTCCCACATCTTCACGATCAACAG
>A03:5M6M:707351	GCTGTATTACCACCCCAAGTCTGGTGATAGCCTTTCTGAGCAGCAGA
>A03:5M6M:708901	GACAAGCCACTCAGCAAAGGCAAACAAGAGGTATATCTCTCTCGCTC
>A03:5M6M:711951	AAGAACTGGTTCCCAACACCAACAAGGTACTCAATACTTTCATGATT
>A03:5M6M:714801	TCGGTTCTGGAAAGGCTGCACTCTTTAGGGTAGAGAAGACCTACGGA
>A03:5M6M:715001	TAGCAAGCATCTCTAGATTTCTGAAGAACGTCCTCGTGTACCTGATT
>A03:5M6M:715851	CTCTATGCACCACAAACTTCTTCTCTCTTATCGCCCAACGAACCTTC
>A03:5M6M:716351	CACGATCAGATTGTCTTTATGACTTGGCCATGCCTGTGCATTCAAAC
>A03:5M6M:717201	CTCTTTGGCCACAAACAATGCACATGTTTCCAAAGGTGCCTGGGTGT
>A03:5M6M:719551	CTAAAGCACCGTATGTTCTCACTGTACATCTCAAGCGGTTTGAAGCG
>A03:5M6M:721001	AAAAGAAAGAGAGAGTCGTCAAAAGATGAACAAATCGTGTTGCAAAA
>A03:5M6M:722751	AAGCTAAGAAGGAACTGCTTCAAAAGTACACGGTGCAAGACACGCAG
>A03:5M6M:723451	TGTTTTTTGTGACCGGAGCGGTTAAAGGAGCATCAGCTGCATAGCTT
>A03:5M6M:723651	CATCTCTCGTAGTCTTTTTGACTCACTTGCATCACTGAGTCATTCTC
>A03:5M6M:726151	TGCAGGGATGGAGAAAACGGATCAAATAAGAGGAAAATTTCATGGCA
>A03:5M6M:731351	ACCGTGGTCATGGAGTCTTTGATACCGCCATGATCGTTAACGGGTCA
>A03:5M6M:732001	CGCTGAACAGCTTGTAAGCAAGGGGATGCTTACGAGTGTGAGAGTTG
>A03:5M6M:733551	CTTGGCTTACAAATCAAATCCTGACTCCGATTCTGGAGTTGTCAGTC
>A03:5M6M:733901	CAAGACTAGAACCTAAACTTCCACAAGGATACATTGGGAACGCTCTC
>A03:5M6M:736701	CTTGATCAGCTGGTTCCTGGTGAAGGGAATCCGATCTTCAGCTGTGC
>A03:5M6M:735601	TTGTCCTCTTCTATCCTGCCGCTGGGAGGCTACAAAAGAGTAAGACT
>A03:5M6M:735751	AAGGAGTGTTGCTTGTGGAGGCTGAGACTGATTCTACTCTACAAGAC
>A03:5M6M:736051	CTCTTGTATGTTTCATGGAAGCATGGTCCAGAACAGCTCGGGGACTT
>A03:5M6M:736251	GGAGTTGTCAGTCTCAAGCTCACACGTCTCCAAGTGAAAGCTCTTAG
>A03:5M6M:736551	ACTCTCTTCCACGCTCGTCCCATATCCTTGCTTGGTGAGTTTCGCAG
>A03:5M6M:746901	ACGCTCTTCGAAGATCTGATTTACCGAAAGGAAATGGAGATGGCGTC
>A03:5M6M:738551	CACAGGTGAGTAATACTGTCTTCGAGTCAGCCAAGAGTGATGTCAGT
>A03:5M6M:740101	TGTACAAAGAATGGCCAATCTTGGAAGAATCAAAGACAACATCAAAC
>A03:5M6M:740251	TCATGATGCTCCCAACCCTCCAACATATGAACCAATCCTCCAGCATG
>A03:5M6M:749451	TTTGGGTTCTGACACAAACCTTGTTCAGAGCAGCCAAGCTTATAACT
>A03:5M6M:755851	TCTCTGGAGTTCCCACGAGTTTGGGTTTAGTGTGCTGCCTAAAACAT
>A03:5M6M:745001	AGATCTCTACGTTACATTGTCCTAAACATCTTAGGAAGTCAAACATA
>A03:5M6M:745451	TAGTTGTTACGGTGAACAGATCTATGAAGAAAGTAGTATAAAGGCTC
>A03:5M6M:751651	ACGGAGGAGACATGTAACAGATCATGGTAGCTAGTATTGCTTGCAGA
>A03:5M6M:751801	CCCATTCGTGATCAATCTGTTTGAAGTCAACACCTTTAGGGTTAATC
>A03:5M6M:745851	ATTGAGACACCAAAAAGCCCTCGAGTAATCTTCTTGGTATGCTAATG
>A03:5M6M:745951	GAAACACACAAACAAGCCAATGAGATTCAGAAGAGAAACCAAACGTT
>A03:5M6M:758651	GTCATATGTACAGACCGATGATCTCGCTTCCGAAGCCTGGTTCTTCT
>A03:5M6M:761551	TCTACAGTCTCTCTATACGTACGATACTATTTTGATGAGAAATCGAC
>A03:5M6M:762851	ACTCAAGGAAGCTCATGACCCGTCTCCGGCAGATGGTTGCTCCGGAA
>A03:5M6M:763051	GAAATAAACGAAGCAACGGTATAATCGTGGAACAAACGTCTATTTTA
>A03:5M6M:773601	TAAAGAAATTCCTACTTTGAGCACACCTCTTGATACCGTGTTGTAAG
>A03:5M6M:773901	GGTTTGGTATGGAACCGGTTGGATCACGCTAAGACTCTTTCCTTGGA
>A03:5M6M:774301	TTGTCAAATGATCGTTTCATGCAACCGCTCCATCTAAGGTTTCCACC
>A03:5M6M:776701	TTATTCTCTAAAGACCACACAAGAATGCATCATTGACCAGGTTTATT
>A03:5M6M:777551	ATGATGGGCTTCTTGAGATCTTTGGGTTAAAGCAAGGATGGCATGCT
>A03:5M6M:778151	AATGGATGGGGAGCCATGGAAACAGCCAATGAGCAAAGACTACTCTA
>A03:5M6M:778401	GTAACAAAGATTTTGGAGTGGATGATGAGTAGATGGACACTCGTAGA
>A03:5M6M:790451	AACGAGAGTTTAACTTAATCGCAATAGATTAATGAAAGAGTGGGATT
>A03:5M6M:791001	TTTCTTACATTGCCAGGAGCCTCGAGAAGATGAATGGCTTAGCTTAG
>A03:5M6M:792551	CAAAAATGTGGGGTACCCGTTTAGTTATCTCATATATATTTTACAAG
>A03:5M6M:798251	AAGTGGTTTGGAAGAGTCTTCAGGATAGAAAACTGAAGCCAGCACCA
>A03:5M6M:800801	CTTTCTTTCTTCTCTCTTTCTCTCCATCTCTCAGATGGGTTTGTTTG
>A03:5M6M:801001	AAGTCCAGAGAGAGATACGGACCATGAAGCTTCTAAACCATCCCAAC
>A03:5M6M:801201	TTCAGACAAACTTTGTAGACATAAGATGAAAGAATCAGATGCCAGGA
>A03:5M6M:801801	CCACCGTTTGATGATCATACACTTGTGGTTTTGTATAAGAAGATACT
>A03:5M6M:802701	GTCTGATAGAAATATCAAAATCCGCAGGCGAGTTAAGACTATACATG
>A03:5M6M:804051	ACCGTATGGGCCTGTGGAATGGGTCAACGAGCAGTCGTAACGCCTTT
>A03:5M6M:806351	ATTGCTCTACGTTCTCTGAATAGAGAGGAGAGACTCCATCGTTGATC
>A03:5M6M:808151	CTCTATAGCCAATCAAATGTCATCGCTAATTAGTTATTTTTAACTTC
>A03:5M6M:810001	ACAACCAGACAACTTACACTAATTGGCCTTGATCGATCACAAAGATG
>A03:5M6M:810151	ACAAAATAACAAGAGGAAGCCATCAAATTTTCAAAAGGAGCAACTGA
>A03:5M6M:815201	TATTTAATTGACAAGAAATTAAGAAAATCTTTGGTACATGCAAGGGG
>A03:5M6M:815401	CTATCCCTCAAGTGTGTCGTTGGACCCTTTAATCCATTACCTAACCT
>A03:5M6M:815501	GTTCGAATCTTGGGAACTTTTGTGGTAGACGACCACGTTTTAGGGAG
>A03:5M6M:816501	TATAAAAACCCAAAGTAAATAGAAGCCCTGCACCATCGCCATCTTCT
>A03:5M6M:816651	AAAGGATGGTCTCTCTGTTGGCTCAGATGCCCAACAACTTTCCATCA
>A03:5M6M:816901	GCAATTCCCACATTACAATCCCAAACGAGTAAACATCGATCTGACAC
>A03:5M6M:817101	TCCAGACACTAAAGTCTTCTGTTTCACCTTAGATAAACCCAAATCAC
>A03:5M6M:817551	GAACTATCCCATAGAAAGACACAACGTTCGGGTGATGCAATGAGCTC
>A03:5M6M:817751	TTGCTTTTATTCTCTTTATTGCAACATCTGAGCCTTTCCATTTGCCA
>A03:5M6M:818251	CCGATTCCATCAACTCGGGCAAGAAACTCAAACGCTCGACTGATAGC
>A03:5M6M:818351	CTTTCCTTCAGCTAAGGGTTGATGTTTATCTAGGCAAGGAACACCGT
>A03:5M6M:818551	CCTGCAGATATTCGCTACGCACAGCCTGGTTCTCAGAAGGCACCCAA
>A03:5M6M:818851	TATTTTGCTGCGGGTAGATGTGGCTATGACTTGCTGAGTGGATGCTT
>A03:5M6M:818951	AGAAGGGTTGGACGGGTTCAAGGGAATGCCACCAAGAGGTTTATCAT
>A03:5M6M:819251	AAAAGTTTCCCTGTTGGGCGGACACTGTGCACAATGAGCAGAAGGAA
>A03:5M6M:819351	ACACGACAGCTCTCGCATATATTACCACCCCCTTCATAGCCACTTGG
>A03:5M6M:819451	CTCCAGCCGGGACCCACACCACGTTATCAGGAACCTGTCCCTGGTGC
>A03:5M6M:819601	GCGAAGACGGAAACTCCTGAAAATGACCATGATGCCGAGGAGAATAG
>A03:5M6M:830951	CGATAACACTCATCTCTTAAACATCTCTTCAATCACATGTCAACAAA
>A03:5M6M:834451	TGTTTAGACCAGACATAGAAGATATCAGTTTTAGTTTGAGTGTTGTA
>A03:5M6M:835951	GGCTTAAACATGTAAGATGATGTTAACCCCCAATAAATTAAAATCAT
>A03:5M6M:844901	AAGTTCGAAGCCGACCACGTTCTTAGTTTTATTTTACCAAATTTATA
>A03:5M6M:845751	ACACTTGCTTCGTTTACAAACTCTGCTTTGAACCTCACGTTCCTTAA
>A03:5M6M:846951	CAAGAAAGCCTCGTAGCATCTTTAAGACCATTACCTCGAGAAGATCT
>A03:5M6M:847301	GATACGGACATTGAACTATTTCAATGTTACTAGCAATCTTAAGCCTT
>A03:5M6M:849901	ACATCCGTCGGTGCAGAACTGATCCGTCGCTTCACAAATCATGCCAA
>A03:5M6M:851801	GTTCCTTTCAAGCATCCGAGCACGTTCGAGACTCTTGCGATGGATCC
>A03:5M6M:851951	GGGCCACCTGGTACTGGTAAGTCTAGTATGATCGCTGCCATGGCGAA
>A03:5M6M:852051	CGGAGTTGAGGAAACTGCTGATGAAAACGAGTTCTAAGTCGATAATA
>A03:5M6M:852751	AGAAGAGGGCTATAGATAGTCAAAATGAAGATGGTGATAATGTTGAA
>A03:5M6M:853951	GTGGTGACAATATAGCTGTCATGTATTATTAGGTATGGAGTTTATAA
>A03:5M6M:856251	TAAAAGAAACTTTATCAATTGCACATGTAGACTCCGGTTTCGAACTT
>A03:5M6M:857851	TTACGCCGAGGATGTAGATCGAGTTCACGAGTCGGTAGACGACGCGG
>A03:5M6M:864601	GATTACACATTCGCGAACGTTGACAATCTGGAGCACTGTGCAAAGTA
>A03:5M6M:865201	GATATAGCTAGACTTGAAGCTAAAGTTGAGAGGCTTGACGCGCAGCT
>A03:5M6M:872351	ATGAAATGAAGAAAAAGGAAAAGGATTACATTAAATTGCAGGTTGTG
>A03:5M6M:865701	GCAGGAACGGTTGAATCAAGTATTGATGGAGAAAAAGAAAGAATCGA
>A03:5M6M:872651	AAGGGAGGCAGCGTGGGACCTGGAATGGCAAGAAGACTGATACTGAC
>A03:5M6M:866051	ATGGCTGAGAACACAAACCTAAGAGCACTGCTTCGATCCATGCAGGT
>A03:5M6M:873551	AATCAGAGCAGCGAAAGGTATTCTATCTTTGAAACTAACACATAGCT
>A03:5M6M:885851	TCATCTGCTGCGAGAATTTAGCTTGTAGAGCTGCGCTCGGAAGTGAA
>A03:5M6M:891101	TTTGTCATCTCAAATTTCTCCTTGAAGTCTGCTGAAGTCAAGTATGC
>A03:5M6M:891601	GTTTTGTGAGGTCTGGTGCATGAGACTTGGGGTAAAGCTTTCGGACC
>A03:5M6M:892001	TGAACAAAGCGCTTGATAGGAGTTAGACTCTAGCCAGAGAGTTTCGA
>A03:5M6M:892751	TACCTTCCTTTTGTGCCTTGGTGTGTTCATCTGGCTGTATAGAAGAA
>A03:5M6M:893701	CGCTATAAAACTTTGATTGTTCTGCTCCTTCGAGAAGGATCTTTTCC
>A03:5M6M:894401	CTTTCTCCAAAGTCTCAGACTCTACGGCTTCTGTCTGTCCCTTCTCC
>A03:5M6M:897501	ATGAGCGCTGGCTTGCATCGGCTATGGAAGGAAAGGTTACACTATTG
>A03:5M6M:899951	TCAAAACCCATTCCCTTCCTTTCCCTTTCTTGTTCGTTCTCTGCTTC
>A03:5M6M:900451	CTCTTCTTAGTACTGCAAGTTAGAGGACATGCCAAAGTGTTAAGGCG
>A03:5M6M:901751	GGAGTCATCGTAGAATATCTCCGGCGGCGCTAGCAGCTCAGGTCGAG
>A03:5M6M:905351	GCATCCTAAGACATACAGAGCTCGCGATATCTCACTCAAGTTCTTGA
>A03:5M6M:907001	CGCACTAAGCAGAGCGACGGTCGGCAACCACCATCTCCTCCTGGCTT
>A03:5M6M:907601	CAATGAAAAGTTCCAAGCTTTAGTCCATGAGGCTATTGAGATGTTGG
>A03:5M6M:907851	GCTGTTCTTGGATATGGCAAACTCACAAGAAACCATATCAAAGCTAT
>A03:5M6M:908401	AGTGATGAAGAAAGTTCAATCCGAAATCAGAGACCAGATAGGGAAAA
>A03:5M6M:908551	AGTGGCAAGAGAAGTAATATCTGAGTTCAAGATCAACGGCTACACAA
>A03:5M6M:920351	AGTCATGTAAGAGACAGGTCTCACCAAAGATAAAGCCACCACGTATA
>A03:5M6M:919601	AATAAATGTTTGGTCCGCACTGGAAGCTTCCGATATGGAATCCATTT
>A03:5M6M:921901	CAAAATCTTTACCGAAACTCAAGCTACTCTTTGGTGTAGATTCAAGT
>A03:5M6M:922151	AAGAGCCTCTGGTTAAGCTTTTGCCTTCTGTTTCTCTCCAACACAAT
>A03:5M6M:923201	TCACATATGTTTCGGCAGCAATGGTCCCTAACGAGAGATGATGTCAA
>A03:5M6M:930201	TCAAGGATTACTTTATTTAGTTTCAAAGTCACAAGCATTCTACACCC
>A03:5M6M:930401	AGTCTCTATCACGGGAGCTTCGTGCAGAAACAAAAACCTGTCTACAA
>A03:5M6M:930501	CTTGGCACGGACGTCCAAAGAAACCGCCATCGTTTAGACAAAAGCAT
>A03:5M6M:932901	GAGAGGGGTACGTTACTAAAATTTATGGCGAATGCGACAAATAGAAT
>A03:5M6M:944801	TCTATAGTCTTTGCAGAGTTCTTGTGGTATAGAAAGAGAGTTTCTTT
>A03:5M6M:945051	ATTTACAGTTTAGTCTGTTTGGTGCTTGTGTGGCTTTAGCATGGATC
>A03:5M6M:950901	ACTAGAGTAAGTGTTCGGGTTTCGAATAAGTTTTCTCCAAACCATTA
>A03:5M6M:952301	ACAGAGTATATTTCGACGCCAGTGAGATTTGAGGCTCGTGGCGTTAT
>A03:5M6M:952501	AAATAAACCGGACAGAACCAAATTAATAACCGAACCGGAAGTTCAAT
>A03:5M6M:954551	TCTGAGCGATCTGCGGTTTCTGTAAAGATCTGATATTTAATCAGGAA
>A03:5M6M:959051	TAGTAGAGCGTACCGGCGATGATCGAGTTTCTGTAAACCGTGACGCT
>A03:5M6M:958001	TCCTGGCTTGAGGTCACGGTGGACGATTGGCTCGGGTTTTGAGTTGT
>A03:5M6M:959351	ACAAGGCAGCCATTATCAGGACAAGCACCGAGGAGAAGGACAACGTG
>A03:5M6M:958301	GCTGTTTAGTTTGTAACTTACCTCTCTTAAAAACTCTTCTTTCTTCT
>A03:5M6M:958601	TAGCATTGATTTTGCTTCTTGGACTTCTTTTACGGCTTTTAGATGCT
>A03:5M6M:958701	GTTATGACCCTTCTCGTTTCTTTAATACACTCAGAGGAAAGAGACTT
>A03:5M6M:960251	TAATAACAGAACGGGTGTGTTCGTCATCGACCAAACCGATGTCAGTG
>A03:5M6M:960451	TCTGCTCCTTGTGGTATACGGAAACTAGATGATGAATCTGGTGAAAG
>A03:5M6M:970001	CCTCGTCAGCGTAATCCTCCCTCACCGCAACGCAACTCTCGCTACCG
>A03:5M6M:977651	AGTGATGATATCGATGAGAACACACATGTAGATGAAGTGAAGGCTCC
>A03:5M6M:977851	GGGGCTGGAAAAGATTTGTGCTCCTTGGGGGAATAATAAAAACGATT
>A03:5M6M:999401	GTCCAGGATCATCTTCGGGACCAGCTCGTGCAAACACAACAGCTTCT
>A03:5M6M:996151	CATGCTCTTTTCCGCGTCGCCACAGTTTAGCTTGATAGATTTTGGAC
>A03:5M6M:996251	AAGGCCACAAGCAAATTGGAAATTCGCCTGAATGTGCTCCACCAACA
>A03:5M6M:996701	ATCGTCTTCCAATTTTCTGCTCTTGAGGTCGCGCTTTTTGTTGATTG
>A03:5M6M:995701	GCCAAAGGGGACTCCAGGATCAACTCCAGTTCGATGGAAAACAAAGG
>A03:5M6M:995901	AGCATGGGAGAAGGAGGCTCCACTTCAACAGAAGCAATCTCTGCACA
>A03:5M6M:995751	GTCCAGGATCATCTTCAGGACCAGCTCGGGCAAACACTACAGCTTCT
>A03:5M6M:993401	CTAACCTTAGCTTCGTTTTGTCTCTCTATGGCAAGGAGTGTCACCTC
>A03:5M6M:41651	TTTAAGGGGAAACTTAGATGAGGATCAATCATTCCAGTTGGTTAAAG
>A03:5M6M:25851_(reversed)	TCTAACAAACCACTAAGGAAAAGATGGAAGCGAAATCATTTCTTCTC
>A03:5M6M:30351_(reversed)	TCTTTATTGTCATTTTCTCTCATTTTTCTCACTCAACTTCCTCAAGG
>A03:5M6M:42751	TCATCGTCTGCAAGTTTAGTGAGCCGTAATGCGGAGAGGCTGATCAA
>A03:5M6M:142451	ATCCAAGAAGAGGAACCAAGTTTCTGTGCTTTAAACTTCCCATAGTC
>A03:5M6M:157951	GATACCTCCGGTTCATCACAAACCGGCCTGAGCCTTTATCAGTGACG
>A03:5M6M:159051	AGAGCAGCTATAACAAAGAACATGACGAAGAGGTAAAGCCACATGAG
>A03:5M6M:197251	CTGGAATCTGTAGTTATCTCCATTTGTGAAACACCAAGAGACAAGTT
>A03:5M6M:188201	GATAACCGATTGCTAGGAGAATCTCTATCAGGTGAGGTGGTTCTCTT
>A03:5M6M:188601	GAAGAGCAGTGGATCTGCTAGAGCTCCCACTCCCACTAGGTGGAGAA
>A03:5M6M:198451	TCGTGCAGATAGAGACAATCAGGATTAACACACGCCTGGAAACAAAA
>A03:5M6M:189601	GAACAGCCTGGATGCAACGGACAGCCTCTTCCTCTTTTGCATAAGTA
>A03:5M6M:199251	TGAGTCTTCTTGCGCTCCATGTTGGTTTCAAAGGCCAGACTAACAAC
>A03:5M6M:200301	AAGCTGGAGATTTGCGAGCGAAAGAGATAGATTGGATGGCTGTGATT
>A03:5M6M:254251	GAAGGAGTGTGGTGTTATCGTAATTACGTGGAAAATGAAGGGGTAGA
>A03:5M6M:251001	TGTGGTCACGACTTGCGACACCGCGTAGCTTTGGAGACTTTCGTGTG
>A03:5M6M:281051	TCGCGAATCCCAGCTACAGATCGTGGACCTCACTTCATCTCGCCGGA
>A03:5M6M:281751	AAAAACAGGAAAGCGGTTCCGTTCCCTTGTCTCCGTTGAGAGATACT
>A03:5M6M:277251_(reversed)	CAGTTGACTCGGTTGATTCCGGGCAGCTTTCGGTAAGCTTTAACATC
>A03:5M6M:288651	AAGCAACAGGCAAAAACATAATAACCCCGAATATGATATTTAAAGCA
>A03:5M6M:291151	TCAATGACCACTGCAGCTACTCAAGACACTGGAGGAACCAATGGGAA
>A03:5M6M:293851	ATCTTTTCAGGTCCAGGATTCGCAATGGCTTTCAATAACAGTTGTAG
>A03:5M6M:304901	GGTTTTTAGTTAACGGATTGTCGGTTGATTCGTACTGCCATTTATAT
>A03:5M6M:366301	TGGTCTGCCATTATTACCCACCTTGTCCAAAACCTGACCTAACTTTG
>A03:5M6M:366651	TTTAGCTCAAGTAAACATGCCAATACCACCGTTTATGGACCAATGAA
>A03:5M6M:389901	ATACACAGAAGGATATTTTGAGAAAGGTCTGGATGGAACATCCTATC
>A03:5M6M:378651	CCTCCAACTCCTGATGAACTCCCAGTGACTTGCAGGTTACGGAAACA
>A03:5M6M:381801	ACAACATCGGTGGTCTACAAATTCTTCATCAAGACTCTTGGGTTGAT
>A03:5M6M:455251	CTCTTTCCCCTCCGCCTTCACAGGGAGCTACTGTGTAGCAATTATAA
>A03:5M6M:475951	TTTCGTCACCTTCCCTGTTAAGTACCGATGCGTTGTTTTCAGACCTT
>A03:5M6M:555651	TTGCATAATAAAGCGGTCCCTTGAGTAGTTCCCTGGTTGAGAGAGCA
>A03:5M6M:587101	GCAACTGATCATCAGAGTTCTGAGAGCTTGAGGGCACTCCTTTGGGA
>A03:5M6M:587401	CAAGACGCATAAGCAGCCTCTCCTGTCACCATCTCCCACAGTACCAT
>A03:5M6M:643651	AGAAAACGGCAGGCCCAAACAATAACTCCGTGAGGGGGTTTGACGTT
>A03:5M6M:644601	TAGCGACAACAATGAAGCCACTCTTGATATCCACTCTCCTGGAAGGT
>A03:5M6M:648451	AAGAAAAAGGAAACAGTTATGTGACCTAACCATAACAAGATATGATC
>A03:5M6M:693901	TTGCAGAGTCTTGAAACTCCATCCACTTACTGCTGCTGCTGATTTTG
>A03:5M6M:713751	TACGGAGGCAATCTCAGTGGGTTTCTTACCAGATTCCTTCTCCAGAC
>A03:5M6M:713951	CTGATTAGGGTTTGACGAAGCATAAGCATCGAGCACCATGTTTTAGC
>A03:5M6M:753551	TCCAGCATGGCACGCATGGACCACCCCTCTCTCCATCGTGTACTGCA
>A03:5M6M:741501	GGGTTCTGACACAAACCTTGTTCAGAGCAGCCAAGCTTATAACTCTA
>A03:5M6M:744551	TTGCCCAAAACATCAAAGATAGGCATAAACAGACAAAAATTAGTCCC
>A03:5M6M:757001	GTGATCAATCTGTTTGAAGTCAACACCTTTAGGGTTAATCCTAAGTG
>A03:5M6M:751951	CCCTCGAGTAATCTTCTTGGTATGCTAACGAATACGCTACTTGTGCA
>A03:5M6M:865901	TGGCAAGAAGACTGATACTGACTTCTACAAAAAGATAGTACGAGTCT
>A03:5M6M:920751	GTTTGGTCCGCACTGGAAGCTTCCGATATGGAATCCATTTATGTTAT
>A03:5M6M:958201	CGAGGAGAAGGACAACGTGAGGATGTCGAAGCTGGCTTAAGACAGAG
>A03:5M6M:959901	TAATACACTCAGAGGAAAGAGACTTGACCTGAGATCACAATGTGGGT
>A03:5M6M:996201	GGGGTGGATGAAGAATTCATATCCATAGCCCAGAATGACAGCCAACA
>A03:5M6M:26851_(reversed)	TTAAGGGGAAACTTAGATGAGGATCAATCATTCCAGTTGGTTAAAGT
>A03:5M6M:30251_(reversed)	TGCGGAGAGGCTGATCAAGTCCTTCAATCTAATGCCTGACCATGACG
>A03:5M6M:189251	CGTGCAGATAGAGACAATCAGGATTAACACACGCCTGGAAACAAAAA
>A03:5M6M:272201_(reversed)	AACAGGCAAAAACATAATAACCCCGAATATGATATTTAAAGCATTAC
>A03:5M6M:257751_(reversed)	GTTTTTAGTTAACGGATTGTCGGTTGATTCGTACTGCCATTTATATA
>A03:5M6M:366401	CATCGGTGGTCTACAAATTCTTCATCAAGACTCTTGGGTTGATGTCG
>A03:5M6M:476601	GTCACCTTCCCTGTTAAGTACCGATGCGTTGTTTTCAGACCTTTCGA
>A03:5M6M:558651	ATAATAAAACGGTCCCTTAAGAAGTTCCCTGGTTCAGAGAGCAATTA
>A03:5M6M:587301	GCAACTGATCATCAGAGTTCTGAGAGCTTGAGGGCACTCCTTTGGGA
>A03:5M6M:741301	GGGTTCTGACACAAACCTTGTTCAGAGCAGCCAAGCTTATAACTCTT
>A03:5M6M:25701_(reversed)	GCGGAGAGGCTGATCAAGTCCTTCAATCTAATGCCTGACCATGACGT
>>A05:35to36Mb:103901_(reversed)	ATGATGTAAAACATTAAATATATCACGGAAATGGATCACGGCTTGCG
>>A05:35to36Mb:102951_(reversed)	CTAAAATTCTGGTTAAGTGACGACACTTATAAGCTGACAGCAATGGG
>>A05:35to36Mb:101651_(reversed)	TGGGAAAATGGTCAACCCTAAAGAGTTCAAATTTAGTGAGGATCAAT
[truncated: 9,084 more rows]

## Sheet: A02_Immortal
>A02:25M26M:979101	TAATACGACTCACTATAGGGATGTGCACGCTCACGTAGTCGTCTCCTGGTGCGGATGTGATGGAGAAGATCTCTCAGTAACTTGTAG
>A02:25M26M:978951	TAATACGACTCACTATAGGGTTCCCGGGGTAAACAGCCACCTATTTGTTACATATATATATACAACTGATCTCTCAGTAACTTGTAG
>A02:25M26M:978701	TAATACGACTCACTATAGGGTCTGACCTTGACAATCTTAACCGGTTTGATGCTTGATCTGAAAGCACGATCTCTCAGTAACTTGTAG
>A02:25M26M:978551	TAATACGACTCACTATAGGGAAAATACTAGATAGGAAAACAGAGCAATTAGGTTTAAAGAGCATACCGATCTCTCAGTAACTTGTAG
>A02:25M26M:978301	TAATACGACTCACTATAGGGAATACCGGTCCACCCTTCCACTTCCTTCACAAAATGCCAGTAGCTCTGATCTCTCAGTAACTTGTAG
>A02:25M26M:978201	TAATACGACTCACTATAGGGGCAAGCAAGCGCGGGAAATCACACGCTAAATGTGACACTACATGGAGGATCTCTCAGTAACTTGTAG
>A02:25M26M:978101	TAATACGACTCACTATAGGGCATCGAACGGAACAACAACACCTAGCTTGGTCTTGTTCCTAAGCCAAGATCTCTCAGTAACTTGTAG
>A02:25M26M:978001	TAATACGACTCACTATAGGGAGTCTCTGCGCCTCCTTTTGCGACACAGACGCAATAACGCATCACGCGATCTCTCAGTAACTTGTAG
>A02:25M26M:977901	TAATACGACTCACTATAGGGGCACAGATGGCAAGCCATAGCATCATGATCCATATTCTCTGCCAGTTGATCTCTCAGTAACTTGTAG
>A02:25M26M:977801	TAATACGACTCACTATAGGGCTGTAGTCGGTTTCAGTTTCTGGCTTAGCATTTGGCTCAGTATCCTAGATCTCTCAGTAACTTGTAG
>A02:25M26M:977001	TAATACGACTCACTATAGGGTGAATTTACAATATGTACCACTAGTGGCTGAGTGGTGAAGGTGGACCGATCTCTCAGTAACTTGTAG
>A02:25M26M:976901	TAATACGACTCACTATAGGGGGCTGCATATTCTTTGGCCTGCTTCTGAATATTGGAGAGTTTGTTTGGATCTCTCAGTAACTTGTAG
>A02:25M26M:976701	TAATACGACTCACTATAGGGAAAGTCAGTGGGGTTTGCGCGTGGACAAATTTGTCAAGGTAATCAACGATCTCTCAGTAACTTGTAG
>A02:25M26M:976601	TAATACGACTCACTATAGGGTTATGATAGAAAGATGATAAATATTGAATGGTGTGTGGTTCGTTTCTGATCTCTCAGTAACTTGTAG
>A02:25M26M:976501	TAATACGACTCACTATAGGGTGACCACACAATGACATCATTTGTTCAGTTACAAATGCACTAAACCTGATCTCTCAGTAACTTGTAG
>A02:25M26M:976351	TAATACGACTCACTATAGGGGTGATGATATATCGACCGTAGATATTAATGGGTTAGGTGAAGATAAGGATCTCTCAGTAACTTGTAG
>A02:25M26M:976251	TAATACGACTCACTATAGGGTCTGATATCTGTTCCCAGAAGAACCTGAGCTGATCCTTGGTGATTGCGATCTCTCAGTAACTTGTAG
>A02:25M26M:976001	TAATACGACTCACTATAGGGTCTAGAGAGAGTTTATCGAACCGTTCTTCCACCGCTGGCCACGCGGCGATCTCTCAGTAACTTGTAG
>A02:25M26M:975901	TAATACGACTCACTATAGGGTAGTGCGGTCAAAACGCCTCACGGCGGGGGAAGGGCGTCTGGAGAATGATCTCTCAGTAACTTGTAG
>A02:25M26M:975801	TAATACGACTCACTATAGGGGAAGGAAAGTGAGCTGGACTTGTTAAGGCTGCTCTCGAGCGTCTTCTGATCTCTCAGTAACTTGTAG
>A02:25M26M:974651	TAATACGACTCACTATAGGGTCAAGATTCTGAGGTCCTCCGGGGCTCGCTTGCTGGACGCTGTGGACGATCTCTCAGTAACTTGTAG
>A02:25M26M:975651	TAATACGACTCACTATAGGGGATCTCCACGTACTCATCGTCTTCACGGCCACCGACACCGCTGATACGATCTCTCAGTAACTTGTAG
>A02:25M26M:974501	TAATACGACTCACTATAGGGGCGAACCTAGCGTTTTTCTTGGACGCGCGTTTTGGCCGGCCAAGCGGGATCTCTCAGTAACTTGTAG
>A02:25M26M:975501	TAATACGACTCACTATAGGGGGTTTCGTTGTCGGACTTGGTGTCTGAGTTAGTTCTTCGTAGAATCCGATCTCTCAGTAACTTGTAG
>A02:25M26M:975401	TAATACGACTCACTATAGGGTCTTCAAGAGTAACGATATTTGTGAGGTTACTATACTACTAATCAAGGATCTCTCAGTAACTTGTAG
>A02:25M26M:974151	TAATACGACTCACTATAGGGCAATTCATAATGTGATAAATATCGGAAGGTAGTGCGAAACTGTGGATGATCTCTCAGTAACTTGTAG
>A02:25M26M:974051	TAATACGACTCACTATAGGGTTTTTTATGAGCTTTCGTATTTTGTTTGTTTACTATTTCCACCGAGTGATCTCTCAGTAACTTGTAG
>A02:25M26M:973051	TAATACGACTCACTATAGGGAGACTTCAAAGTCTACCAAGAGCAAAAGAAACTAACAAACCTTACGCGATCTCTCAGTAACTTGTAG
>A02:25M26M:972951	TAATACGACTCACTATAGGGCAAGGTATTTAAGACACCTTTAGGTCTACTAAGCCATACGCGTGAACGATCTCTCAGTAACTTGTAG
>A02:25M26M:972601	TAATACGACTCACTATAGGGGAGAATTGCAGCAGGCATGAACATATACGATATCTACTTATGAACCAGATCTCTCAGTAACTTGTAG
>A02:25M26M:972451	TAATACGACTCACTATAGGGAACATATGATATAATTGAGGGCGCATAGTAGAAGTAGATGGGGTTTAGATCTCTCAGTAACTTGTAG
>A02:25M26M:972301	TAATACGACTCACTATAGGGCTTTGCTATGCTCTTTTTATGTAATTTCAAAGCCGTAAGTGCTTTCCGATCTCTCAGTAACTTGTAG
>A02:25M26M:972151	TAATACGACTCACTATAGGGTTTACCATCAAGTCACAGAATATTACTATTCCGATTGGTGATCAAGAGATCTCTCAGTAACTTGTAG
>A02:25M26M:972001	TAATACGACTCACTATAGGGAGAATAAGATGGTAGAGCTTACGTTCCAACTTCTACAAGTAGACGACGATCTCTCAGTAACTTGTAG
>A02:25M26M:971901	TAATACGACTCACTATAGGGTGGCGTATTTTCTTTTCCTCATAACTTTCTTGTGTGTTTTACTGATAGATCTCTCAGTAACTTGTAG
>A02:25M26M:971701	TAATACGACTCACTATAGGGTGTGAACATTAATCCCTAACTTCACACGTAGCTAAACCTTCCATTAGGATCTCTCAGTAACTTGTAG
>A02:25M26M:971601	TAATACGACTCACTATAGGGTCTGTTGTTATCTACTACGTACGCGTATGTTATCTTATTTCAACAAGGATCTCTCAGTAACTTGTAG
>A02:25M26M:971501	TAATACGACTCACTATAGGGTTAGAATTAGCCGTTTTTCGTGGACTCTGGAAAATCAATCTGCATAGGATCTCTCAGTAACTTGTAG
>A02:25M26M:971051	TAATACGACTCACTATAGGGAAAAAAAAATATGAAAAAGGGGTTGGCGTGGTAAATGCAAAGTGAATGATCTCTCAGTAACTTGTAG
>A02:25M26M:970851	TAATACGACTCACTATAGGGCTGGTTTGGTTGGTAAGTTACATCTACGACGGCTTATAGCTAAACATGATCTCTCAGTAACTTGTAG
>A02:25M26M:970151	TAATACGACTCACTATAGGGATCCCATCCAAGTTTACACACCTCTCCACTCCCATATCTGCAACAATGATCTCTCAGTAACTTGTAG
>A02:25M26M:969851	TAATACGACTCACTATAGGGGCCTGAAAGCTTTTAGCTGCTCAAGGCACTGATATGTGAATTTACCGGATCTCTCAGTAACTTGTAG
>A02:25M26M:969701	TAATACGACTCACTATAGGGAGTCACATTCTTTAACTATCACTCAGCAGAAATCATGTCAAGTTAATGATCTCTCAGTAACTTGTAG
>A02:25M26M:969401	TAATACGACTCACTATAGGGAGCTCACTATCACCAACAACCAAGAAGCACACTGATCCTCTCTACTCGATCTCTCAGTAACTTGTAG
>A02:25M26M:969251	TAATACGACTCACTATAGGGCAAGAGATGAGAGAGAGATCTCAGCCAATTACCATATCGTGCCCACAGATCTCTCAGTAACTTGTAG
>A02:25M26M:969151	TAATACGACTCACTATAGGGAGAGTCTTCAAATCTCTGTAATTCATCTCCACGAACGTCCTGAATCGGATCTCTCAGTAACTTGTAG
>A02:25M26M:969051	TAATACGACTCACTATAGGGATCTTAACAGAGTTTGATTCGATCGGAGACCATAACGAAAGGGAAGGGATCTCTCAGTAACTTGTAG
>A02:25M26M:968851	TAATACGACTCACTATAGGGGATGGTTCAGGTGAAAATGGAGTTATTGAATTTATTGGGCTTTGGCCGATCTCTCAGTAACTTGTAG
>A02:25M26M:967451	TAATACGACTCACTATAGGGTGGGAGACAATCAACAATACGACAAGAGCATTGAGATTTGGAAGATGGATCTCTCAGTAACTTGTAG
>A02:25M26M:967351	TAATACGACTCACTATAGGGGTGATCACATCTCTCGTGCCACCAAGTTGTTGTGCGATGAGTACGGAGATCTCTCAGTAACTTGTAG
>A02:25M26M:967201	TAATACGACTCACTATAGGGGTCTCGTCCTCTACACTGGCACCATTGTCAACGAAGAAGGCAAGGAGGATCTCTCAGTAACTTGTAG
>A02:25M26M:967101	TAATACGACTCACTATAGGGCCTCTGTGACAACAAGTTCCACACCGAGGCTAACGAGTACAGGCGTTGATCTCTCAGTAACTTGTAG
>A02:25M26M:967051	TAATACGACTCACTATAGGGGCTGTGCGTTGGAGTTTGTAACCAACAAGTCGCAGGAAGGGGATAAGGATCTCTCAGTAACTTGTAG
>A02:25M26M:966951	TAATACGACTCACTATAGGGTGCTGACTTTGATGAAGAAGAGGATTTGGATGTTAGTGATGGTGATGGATCTCTCAGTAACTTGTAG
>A02:25M26M:965501	TAATACGACTCACTATAGGGATTTGGAGGTCAGAGTTACTAACAAGAAACCTGAAAGTTGCTTAGCCGATCTCTCAGTAACTTGTAG
>A02:25M26M:965401	TAATACGACTCACTATAGGGGAAATAGGGGTAGTATAAAAGGTGTCCGAGAATGGATTGGATATTACGATCTCTCAGTAACTTGTAG
>A02:25M26M:965301	TAATACGACTCACTATAGGGACACCGATACCCAAAACGAAGCAACCAAGCAAAGGGACGTGGCTTACGATCTCTCAGTAACTTGTAG
>A02:25M26M:965201	TAATACGACTCACTATAGGGCGAGAAATGGAAGTGCCATGTAGAACGCTTTGAGTATGATAGAAATAGATCTCTCAGTAACTTGTAG
>A02:25M26M:965051	TAATACGACTCACTATAGGGAAACGGCCATTCCCAAGTTGGGAGCAGAACCGTTGTAACCACCTGGTGATCTCTCAGTAACTTGTAG
>A02:25M26M:964951	TAATACGACTCACTATAGGGAAGAGTATTGACTTGATCTTTGTACCTCCCACCATCTGCTAACTTCAGATCTCTCAGTAACTTGTAG
>A02:25M26M:964851	TAATACGACTCACTATAGGGAAAGCCAACCAAGTCAATCTCTGTACATACAAATACACACATTAGTAGATCTCTCAGTAACTTGTAG
>A02:25M26M:963401	TAATACGACTCACTATAGGGCCAGCCCAGTAACTGGGTTCTTTTTAGTTGAATAAAAGGGAAAATAAGATCTCTCAGTAACTTGTAG
>A02:25M26M:963301	TAATACGACTCACTATAGGGTTGAAACTACCTTGAATGGAAGAAACATATTACCTGATGGAATACATGATCTCTCAGTAACTTGTAG
>A02:25M26M:963201	TAATACGACTCACTATAGGGTTTGTTTTCGTAAGGTCAACTCTATTGTCCCAAGTAAGCATACTAACGATCTCTCAGTAACTTGTAG
>A02:25M26M:963051	TAATACGACTCACTATAGGGAGGATAAACTTGATGGGTTCAAGTTTTCCATTCCTTGCTGCAACGTGGATCTCTCAGTAACTTGTAG
>A02:25M26M:962951	TAATACGACTCACTATAGGGTAAGTATTTCCTCAAGAATTTTGACATGGCCATATTTGGCCGCCATAGATCTCTCAGTAACTTGTAG
>A02:25M26M:962851	TAATACGACTCACTATAGGGGTCCAAGAGATAGCAGATCCCTTCATAATATCCTATGGACGCTCCAAGATCTCTCAGTAACTTGTAG
>A02:25M26M:962751	TAATACGACTCACTATAGGGCTGAGTAAAGCAGTAAGGATATCTGTTCGAGAAATAATATGAGTAGCGATCTCTCAGTAACTTGTAG
>A02:25M26M:628051	TAATACGACTCACTATAGGGTCATTTAATTTCTCTGTTCTTTTTTACAGGCTCATGCTTTCACCTCAGATCTCTCAGTAACTTGTAG
>A02:25M26M:962651	TAATACGACTCACTATAGGGACCTTTCCTCTTAGCTTTCAGTGCCGCATGTACGATGGATCTTCCTCGATCTCTCAGTAACTTGTAG
>A02:25M26M:962551	TAATACGACTCACTATAGGGGCCTGTCCAGCTTCTATAGCAAGGTACAAGGGAGAAAACCCATCGCTGATCTCTCAGTAACTTGTAG
>A02:25M26M:962451	TAATACGACTCACTATAGGGACATGTGTTTCTCTTTTAAGGCAACATGCAAAGCAGTGTCTTGGTTTGATCTCTCAGTAACTTGTAG
>A02:25M26M:962351	TAATACGACTCACTATAGGGCTCTATTATGAAATCAACTAGATTCAACATAACATCAAGATGGCCTGGATCTCTCAGTAACTTGTAG
>A02:25M26M:962251	TAATACGACTCACTATAGGGAAACTTGGGCATTGGTTGATCAGATAACGGACTAGACTGGCATGACCGATCTCTCAGTAACTTGTAG
>A02:25M26M:962151	TAATACGACTCACTATAGGGGAGCAAGTCTAACGTAGCTGTAGTTATCTCTCAGGTAATTTACATTAGATCTCTCAGTAACTTGTAG
>A02:25M26M:962051	TAATACGACTCACTATAGGGGAGAGATGGTGTGGATATAACATTGTTTATTGGTGGTATTGAAGGTTGATCTCTCAGTAACTTGTAG
>A02:25M26M:961851	TAATACGACTCACTATAGGGTCTGTTACCACTGAATTTGCTACAGCACACTAAGGGTTTGATAGAATGATCTCTCAGTAACTTGTAG
>A02:25M26M:961751	TAATACGACTCACTATAGGGATATTTAGACGTGCTCAGATCAGTAAAATAATCTCCCAGCGATTTTAGATCTCTCAGTAACTTGTAG
>A02:25M26M:960701	TAATACGACTCACTATAGGGGGCCACGTCTGACACATGATTGTATCTTATATAATAAGATAGTTAGTGATCTCTCAGTAACTTGTAG
>A02:25M26M:960601	TAATACGACTCACTATAGGGCCTTCTTAGCGTCTCATCTTCATCCGAATAGTTATAGATCGTTAGAGGATCTCTCAGTAACTTGTAG
>A02:25M26M:960501	TAATACGACTCACTATAGGGAGAGTTGGGAACAACCAGTGACAAACACATTAACCAGACCTGCGTGAGATCTCTCAGTAACTTGTAG
>A02:25M26M:960301	TAATACGACTCACTATAGGGAGAAGTCTTCCATCCCTCTCATTCAGTGGAGCATCGATCTTGTAGTGGATCTCTCAGTAACTTGTAG
>A02:25M26M:960201	TAATACGACTCACTATAGGGAAAGATTGTTTTTGTTTCCTTACTTGTACAATACGCGTTTGAGTGACGATCTCTCAGTAACTTGTAG
>A02:25M26M:958851	TAATACGACTCACTATAGGGAGTTCACAATGTGTAATAATAATAAGCTTAGAGCCACTCACTACCAAGATCTCTCAGTAACTTGTAG
>A02:25M26M:958751	TAATACGACTCACTATAGGGTTGAAAAGAAAATAAATGTTACCGAATTAAAAGGGGAGGTGGTAAATGATCTCTCAGTAACTTGTAG
>A02:25M26M:958651	TAATACGACTCACTATAGGGAAGTTTCGCAACTCCTCCTAGAATCTTCTGGTCTCTCTCTCTCTCTCGATCTCTCAGTAACTTGTAG
>A02:25M26M:958501	TAATACGACTCACTATAGGGGTGAGACTTTCGCTCTTGACAACAAACCATCCAGCGCCAGGGATTTGGATCTCTCAGTAACTTGTAG
>A02:25M26M:957951	TAATACGACTCACTATAGGGAGCAGCTTTATCTGTCTGAAATGCGGTGGTCTTGTGAGCGTCCATAGGATCTCTCAGTAACTTGTAG
>A02:25M26M:957351	TAATACGACTCACTATAGGGTTAGGCAGAGCCTTATGTCTAGGTTTAGTCCTGACAAGTGTTTCGTCGATCTCTCAGTAACTTGTAG
>A02:25M26M:957251	TAATACGACTCACTATAGGGACTGAACAATCCACTGGTGATGGCTTCTCTTCCACCTCCAAAGTCTCGATCTCTCAGTAACTTGTAG
>A02:25M26M:957151	TAATACGACTCACTATAGGGTACCATCTGCACCAATCAAAAACTACATAAGAATCTTAGTCCATCATGATCTCTCAGTAACTTGTAG
>A02:25M26M:957051	TAATACGACTCACTATAGGGTAAATGCAGCAGAGTCTCTCACTTTGCCATTAGCAATCCCTGGAGTGGATCTCTCAGTAACTTGTAG
>A02:25M26M:956151	TAATACGACTCACTATAGGGCTCTCCCATTGACCGTAGCTGGTTCCAACGGCCACGGTTTGTAAAAGGATCTCTCAGTAACTTGTAG
>A02:25M26M:955901	TAATACGACTCACTATAGGGATCCATTTTTTCCTCTTGGAGGACTTAATCCTTTCGCCGCAAACTCAGATCTCTCAGTAACTTGTAG
>A02:25M26M:955401	TAATACGACTCACTATAGGGGCATCAGGCTCCATACCTGAGTGATCACGAGGGGACGATTTTCGAGCGATCTCTCAGTAACTTGTAG
>A02:25M26M:955301	TAATACGACTCACTATAGGGTCTGAAGAACCTGAGAGTTACAAACTTCTGAATCTTCTTTTTTTCTTGATCTCTCAGTAACTTGTAG
>A02:25M26M:955251	TAATACGACTCACTATAGGGTTTTCAGAGACCTTGGAACAATACTCAAAGTCCAAACTTTCAAAATTGATCTCTCAGTAACTTGTAG
>A02:25M26M:955101	TAATACGACTCACTATAGGGAGGTATGTTTCAGTTTTAAAGCTACAGTTAGAATCTAAGATCAACAAGATCTCTCAGTAACTTGTAG
>A02:25M26M:954901	TAATACGACTCACTATAGGGAAGATATGACATGAGTATATATATATACCTTTTGTGCCTTGATGGAAGATCTCTCAGTAACTTGTAG
>A02:25M26M:954601	TAATACGACTCACTATAGGGCCACCTGAAGGACTAATGCAAAAAAAATCTATTCCCACCTGAACAGAGATCTCTCAGTAACTTGTAG
>A02:25M26M:954501	TAATACGACTCACTATAGGGCAGCCGTATCATAGCCGTCAAAAAGCTTCATTTCAGACTCTTTTTCCGATCTCTCAGTAACTTGTAG
>A02:25M26M:954401	TAATACGACTCACTATAGGGCTTGTGCTCCCACTCCTTAGCCTCTTCATCTACTTCCCTTGATTCACGATCTCTCAGTAACTTGTAG
>A02:25M26M:954251	TAATACGACTCACTATAGGGTAATTAGATGACTCTATACTCTGCAAGCTCCTTTTCAGCCCATCTGGGATCTCTCAGTAACTTGTAG
>A02:25M26M:953901	TAATACGACTCACTATAGGGTTCAGACAGTAAAGGTCAACATACCTGGAGTTCTGCACATGAGGATCGATCTCTCAGTAACTTGTAG
>A02:25M26M:953301	TAATACGACTCACTATAGGGCTAGAGCACTGATGACATTACCAAGCGCAAGGAGGCCTTTATTAATGGATCTCTCAGTAACTTGTAG
>A02:25M26M:953151	TAATACGACTCACTATAGGGTACCGTCAGAGCCTGTTCTTTTGGCTCGTTCTGAACCGGCAAGGTCCGATCTCTCAGTAACTTGTAG
>A02:25M26M:950551	TAATACGACTCACTATAGGGTAGTTTTTGTAACTAAAATCTAAGATCACCATCCAAACTGATAAAGGGATCTCTCAGTAACTTGTAG
>A02:25M26M:950201	TAATACGACTCACTATAGGGTTTGGTAGATTCTTACAATCGCTTTAATTGAATGAGTTTGGATGAATGATCTCTCAGTAACTTGTAG
>A02:25M26M:940601	TAATACGACTCACTATAGGGCCCATCCATAAATTGCTTTTAACTTTTTATCCTATCGGATCATCATTGATCTCTCAGTAACTTGTAG
>A02:25M26M:940501	TAATACGACTCACTATAGGGTGATCCAAAGTGCACATGCATACTCTTTAAGAGTGGGTTGTTTGCATGATCTCTCAGTAACTTGTAG
>A02:25M26M:940401	TAATACGACTCACTATAGGGCATGAGCTTTATGGTTTGGTTTGGACTTAGATTTTCCGGCGTAAAAAGATCTCTCAGTAACTTGTAG
>A02:25M26M:940301	TAATACGACTCACTATAGGGTTGATCTTGTCTTCCTTAAAATTTGCCAGCTTTGAGTCAACAACCAAGATCTCTCAGTAACTTGTAG
>A02:25M26M:940151	TAATACGACTCACTATAGGGTATGAGATAAGAAGACACACACCGCCAAATAGAAATGGGTTGGTGACGATCTCTCAGTAACTTGTAG
>A02:25M26M:940051	TAATACGACTCACTATAGGGGAAGAGAAAACCAGATTAGCACTACCCGATGGCGATATTAGTGATAGGATCTCTCAGTAACTTGTAG
>A02:25M26M:939901	TAATACGACTCACTATAGGGGCGCATGATAATATTAAGAAGAAGCAAAGGACGACTTTTAGGGAAGGGATCTCTCAGTAACTTGTAG
>A02:25M26M:939801	TAATACGACTCACTATAGGGTAGCGAAGTGGTCCCATAGATATAGACTTTATGGGCAAGTCACTGCCGATCTCTCAGTAACTTGTAG
>A02:25M26M:939151	TAATACGACTCACTATAGGGGTACTTGGTTTGGTAGAAATGGACGTGTCGAATTGAGGTGCCGCACTGATCTCTCAGTAACTTGTAG
>A02:25M26M:938901	TAATACGACTCACTATAGGGGCAAATGGTACTTCACTAGAAGCTTGCCCTTTACGTAAACCAAGAATGATCTCTCAGTAACTTGTAG
>A02:25M26M:938851	TAATACGACTCACTATAGGGACTATCCCTATACCTGACCTTTCTTTCTCCACAAGTTATCTGTCACTGATCTCTCAGTAACTTGTAG
>A02:25M26M:938751	TAATACGACTCACTATAGGGCATGAAGAAGCCAGAGAGCAAGGGAACAGGCCAAACCGTCTTGCACTGATCTCTCAGTAACTTGTAG
>A02:25M26M:938651	TAATACGACTCACTATAGGGAGAGTTTGACACTTTTATTACACTTCAAAAATCCAAACTGTCGGAAAGATCTCTCAGTAACTTGTAG
>A02:25M26M:938501	TAATACGACTCACTATAGGGGCAGCAATCTCATTCAACTCCACAACTGAATCTCCACCAACCGCTTCGATCTCTCAGTAACTTGTAG
>A02:25M26M:938351	TAATACGACTCACTATAGGGGCTGCTTCTCCTCCAACCGCGCTCACAAACTCTCTTAACCGACACATGATCTCTCAGTAACTTGTAG
>A02:25M26M:938251	TAATACGACTCACTATAGGGGATCACCAGTCACACACAAGAAGTACTGATAATTTGTAGAAGTTTCAGATCTCTCAGTAACTTGTAG
>A02:25M26M:938151	TAATACGACTCACTATAGGGGCCTCGAACTTTGAACAATGTCGCCTTGTCATGACCAGCATCATCTAGATCTCTCAGTAACTTGTAG
>A02:25M26M:937801	TAATACGACTCACTATAGGGACCCAAAATCATAACCATCTGACCTTCCCGGTTTATGCCCATCCTCTGATCTCTCAGTAACTTGTAG
>A02:25M26M:937701	TAATACGACTCACTATAGGGTATAGCAACTGCTTTAGATGTAAGAAGTGTCCTATAATCACCAGTGGGATCTCTCAGTAACTTGTAG
>A02:25M26M:937601	TAATACGACTCACTATAGGGATCTTTGTTGGTGCTACCATACAAGGCCACAAACCATGCTTCTCTTCGATCTCTCAGTAACTTGTAG
>A02:25M26M:937501	TAATACGACTCACTATAGGGTAGAGACCTATTTGAAGTACTGAAAACACACGTACCTCGATTCGAATGATCTCTCAGTAACTTGTAG
>A02:25M26M:937401	TAATACGACTCACTATAGGGTCTTTATATTAACCGGGTGTGAAACAAGAATGCGTGAGATCTCTTTGGATCTCTCAGTAACTTGTAG
>A02:25M26M:937301	TAATACGACTCACTATAGGGAGGTTTAGCTTCAAGAAGCAAACGATTATCCTTCAATGGATCTGTTCGATCTCTCAGTAACTTGTAG
>A02:25M26M:937201	TAATACGACTCACTATAGGGTCCGTTGCATATCTGTATAAGATCATCTTACTTTAGCCAAAACCCTAGATCTCTCAGTAACTTGTAG
>A02:25M26M:937051	TAATACGACTCACTATAGGGAAGTATAGGTCCTTCTTCTTCAAAATGCCTATCAGCTCTCCTACTAAGATCTCTCAGTAACTTGTAG
>A02:25M26M:936801	TAATACGACTCACTATAGGGTGGCATTGGTCTCAAACTTGTAAGATCAACAAAAGAATCTACAAGATGATCTCTCAGTAACTTGTAG
>A02:25M26M:936651	TAATACGACTCACTATAGGGCTCTAGGGTCGTAACCCATCAGAGAGAGGTGAGCTGTGTCACTACCGGATCTCTCAGTAACTTGTAG
>A02:25M26M:936551	TAATACGACTCACTATAGGGGATTGCGTCGAGGTTAGGTATGTTTGCTGCCTGTAGAGGAGTTTTGTGATCTCTCAGTAACTTGTAG
>A02:25M26M:936451	TAATACGACTCACTATAGGGACTCTCTTTTTGACTTCTCGATCACCATGTTCCATCTGGCTGTCTTTGATCTCTCAGTAACTTGTAG
>A02:25M26M:936301	TAATACGACTCACTATAGGGGATCGGAAACTTCGTTACCTGACAAAGAGAAGTGATCTTCAAAGAATGATCTCTCAGTAACTTGTAG
>A02:25M26M:936101	TAATACGACTCACTATAGGGGGACATTTGATGGGCCACTACATAAAGTCCAAGGTAAGATTATTAATGATCTCTCAGTAACTTGTAG
>A02:25M26M:935951	TAATACGACTCACTATAGGGACGTGTTGGTCGATGGGAATGGTTCAACTTCCAAAGAGTTTACGTTGGATCTCTCAGTAACTTGTAG
>A02:25M26M:935651	TAATACGACTCACTATAGGGAGAACTAACTCTGGCGTAAGACCAACTAGCTAACTAATTTCAAATATGATCTCTCAGTAACTTGTAG
>A02:25M26M:935101	TAATACGACTCACTATAGGGATAACGGATACTCGTCGTCGTGTTGGTTAATTATATTATTAAGGTGTGATCTCTCAGTAACTTGTAG
>A02:25M26M:934601	TAATACGACTCACTATAGGGTTCATGAAAATCTCACTTTGCTTGTGATTTACAATATCCTCGTTGTGGATCTCTCAGTAACTTGTAG
>A02:25M26M:933301	TAATACGACTCACTATAGGGTGAATCATTGATGTTGTGATATGTCTTCGTATTTATTCAGTCGGTTGGATCTCTCAGTAACTTGTAG
>A02:25M26M:933051	TAATACGACTCACTATAGGGTGAATCGTAAAATAGCTTTATACCAAATTTTCTATCCGAAGGACCAAGATCTCTCAGTAACTTGTAG
>A02:25M26M:931651	TAATACGACTCACTATAGGGACATGTATAATTTAATAATTTGAGAAGTCTCCAACATTGTTGGCATCGATCTCTCAGTAACTTGTAG
>A02:25M26M:931551	TAATACGACTCACTATAGGGATTTTCATTATTCTAAAAACCTTTGGCATGTGGGGTTTTCGGAAGGAGATCTCTCAGTAACTTGTAG
>A02:25M26M:931451	TAATACGACTCACTATAGGGTACACTAGGTATGTAGTCCCCACGAAAAATACTACACATCAGGAAAAGATCTCTCAGTAACTTGTAG
>A02:25M26M:931351	TAATACGACTCACTATAGGGTATGAATATCTAGCTGGTAGAACGTATTTTGGGAGGTAAATTCTGAGGATCTCTCAGTAACTTGTAG
>A02:25M26M:931251	TAATACGACTCACTATAGGGTTTGTTTCTAATTCTGCTTTCAACTCTCTATTGACGGACGAGAGGAAGATCTCTCAGTAACTTGTAG
>A02:25M26M:931151	TAATACGACTCACTATAGGGTTTGTAGTACCATAGGTCCATGACACTGACATATGCTCGGTTTTATCGATCTCTCAGTAACTTGTAG
>A02:25M26M:931001	TAATACGACTCACTATAGGGACGAGATAGTATAATGAAAAGACTTCTGTGGCAAAAACTAATTTTAGGATCTCTCAGTAACTTGTAG
>A02:25M26M:923351	TAATACGACTCACTATAGGGATGCAGTCTGATTTACACGTCAAACTAGTTTTTAAAAGCAGGACCATGATCTCTCAGTAACTTGTAG
>A02:25M26M:923151	TAATACGACTCACTATAGGGTGAAAGGTTGGGCTGGACCAATGAAAATGGCGGCTACAGCTGGCGACGATCTCTCAGTAACTTGTAG
>A02:25M26M:923051	TAATACGACTCACTATAGGGCTTCTCGCCTCTCAAAATCTAACGGCTTAAATTCCTCAATAAACTACGATCTCTCAGTAACTTGTAG
>A02:25M26M:922951	TAATACGACTCACTATAGGGGACGCATGGGTCCCGCTCACTTGGTTTTCATTGCTTATGTTTTTGTAGATCTCTCAGTAACTTGTAG
>A02:25M26M:922851	TAATACGACTCACTATAGGGGTTGTATATTTGTATCTTATTGTTAGCTTTGGTTGGTTCTTCGTCTTGATCTCTCAGTAACTTGTAG
>A02:25M26M:922701	TAATACGACTCACTATAGGGTTATAAAAGCTTCTTGGTAAGAGACCGAAAATTATGGGCAAGACTAGGATCTCTCAGTAACTTGTAG
>A02:25M26M:922301	TAATACGACTCACTATAGGGTAAATAACACTAAGATTCCGGAGATTCCAATATAGAAAAGTCAAAGAGATCTCTCAGTAACTTGTAG
>A02:25M26M:922201	TAATACGACTCACTATAGGGCCTTCATATCTTCCTCCACCGTCTCTCCAGAAATTTCCTATTTCAATGATCTCTCAGTAACTTGTAG
>A02:25M26M:922101	TAATACGACTCACTATAGGGTCATCTTATAGTCAGTGCCTGGCTGTCTCTGTCGTCCGTAATTATTAGATCTCTCAGTAACTTGTAG
>A02:25M26M:921901	TAATACGACTCACTATAGGGATATGTGTGGCAGTAACAAAGGAGGAGACATCAATCACACAACAAAGGATCTCTCAGTAACTTGTAG
>A02:25M26M:921701	TAATACGACTCACTATAGGGGTTTCTCCGCTTTGAGCCCGGTGGGTCAGCCCACCGTGACCGCTTCAGATCTCTCAGTAACTTGTAG
>A02:25M26M:921601	TAATACGACTCACTATAGGGTGTCCACCACCCAAAACCAAACGAAGCTCACCATGACATCGATCTGTGATCTCTCAGTAACTTGTAG
>A02:25M26M:921501	TAATACGACTCACTATAGGGACCGCCGTGCTGCATGCGGCGGCGATAGGTCCGATGGTGGATCTTGGGATCTCTCAGTAACTTGTAG
>A02:25M26M:921351	TAATACGACTCACTATAGGGGACGCTGACGCAGCCGCGCAGCGCGTAAGAAGTGTTTACGAGGCTACGATCTCTCAGTAACTTGTAG
>A02:25M26M:921251	TAATACGACTCACTATAGGGCTTGCGATGATAACATGCACCATTTCCTTCGAACCATTGAAGCTGCCGATCTCTCAGTAACTTGTAG
>A02:25M26M:921001	TAATACGACTCACTATAGGGTAATGGGGCCCTAATTATCAAATTAGGGCAAGTTGGTTCCACAGCCGGATCTCTCAGTAACTTGTAG
>A02:25M26M:920851	TAATACGACTCACTATAGGGGCGTTTTCAAAACCTTTGATAAGTACCAAGTATACACAGCCAACTTGGATCTCTCAGTAACTTGTAG
>A02:25M26M:920651	TAATACGACTCACTATAGGGACTAGAACTTTCGTCAGAAAGCTAGTAGATTACACTTTAGGAATATTGATCTCTCAGTAACTTGTAG
>A02:25M26M:920501	TAATACGACTCACTATAGGGTGAAGATAACCGCGATTTGTCCCATTAGTCTTCTAAAACGAGTGAGTGATCTCTCAGTAACTTGTAG
>A02:25M26M:920401	TAATACGACTCACTATAGGGCAAATCGTTTCCGGTTTTCTCCGATTCAAGCCCTCTTTACCACACAAGATCTCTCAGTAACTTGTAG
>A02:25M26M:920201	TAATACGACTCACTATAGGGTGGCGTACTCATCAGCGATCTTGTTCAATGCGGACAAAGACAGACCAGATCTCTCAGTAACTTGTAG
>A02:25M26M:920101	TAATACGACTCACTATAGGGTTTGGCCGTACAAGAAGCCGAGAAGGAAAATGTTCCTATGGGGTTTAGATCTCTCAGTAACTTGTAG
>A02:25M26M:920001	TAATACGACTCACTATAGGGGGGCACAAGTCACCAGTCCACGACACAATTCAGAACACGCACGATTGGATCTCTCAGTAACTTGTAG
>A02:25M26M:919901	TAATACGACTCACTATAGGGTCGGTGTGGTTCTTGCAACACATAACGCTGATTCTGGTAAGCCACTGGATCTCTCAGTAACTTGTAG
>A02:25M26M:919401	TAATACGACTCACTATAGGGTATTGGTTATTGCAGGATGGAACTAAAGAGGAGATTACTCGCCGGAAGATCTCTCAGTAACTTGTAG
>A02:25M26M:919251	TAATACGACTCACTATAGGGATATTATGTAAGTAGGTAAGAACATTTCATCTGGTTTTGTTGTAAGGGATCTCTCAGTAACTTGTAG
>A02:25M26M:918801	TAATACGACTCACTATAGGGATTCTTCAAAGAAGAAACAGTTTTTTTACTCAATGGAGACCGTCATAGATCTCTCAGTAACTTGTAG
>A02:25M26M:911751	TAATACGACTCACTATAGGGTATTTTGACGGGCTGTTTTGAGAAAAAGCTCATCATTTGCTTACAAAGATCTCTCAGTAACTTGTAG
>A02:25M26M:911551	TAATACGACTCACTATAGGGTCCTGGTATCAAAATATAACCATCAACAGTTTGATGGCTTTGAAAAAGATCTCTCAGTAACTTGTAG
>A02:25M26M:910851	TAATACGACTCACTATAGGGATTAAAGTGCACTTGAGAAAAGAGTGGCGACCACTTAATAGCCACACGATCTCTCAGTAACTTGTAG
>A02:25M26M:910751	TAATACGACTCACTATAGGGCGCGGCGTCCACCAATAGACGCCAATCAATGTGAAAGTTATCAAATGGATCTCTCAGTAACTTGTAG
>A02:25M26M:910451	TAATACGACTCACTATAGGGGGCACCGTATAAGTCATTTGCAATTTTCGAACCGAACATATGGTCATGATCTCTCAGTAACTTGTAG
>A02:25M26M:910251	TAATACGACTCACTATAGGGGCATTAAACAAAACTTTATCTATACTACCAGACTACCAGTCTACCACGATCTCTCAGTAACTTGTAG
>A02:25M26M:910151	TAATACGACTCACTATAGGGAAATCTCTTATTCTTTGTTCTGGCAAAAGAAAAAAGAGACGTAACTGGATCTCTCAGTAACTTGTAG
>A02:25M26M:910051	TAATACGACTCACTATAGGGCGGTGGAGGGATCACCGGAACAGCCAAGCAACTAGGTTTATCCTCTCGATCTCTCAGTAACTTGTAG
>A02:25M26M:909951	TAATACGACTCACTATAGGGTTGTTGTCTCCGGTGTCGTCCTCTTCGCCCACAGGATTGGTGTCATTGATCTCTCAGTAACTTGTAG
>A02:25M26M:908751	TAATACGACTCACTATAGGGTGACTAGACGTGGTCATATGACTCGTATGAGATGCCAATTGGTATACGATCTCTCAGTAACTTGTAG
>A02:25M26M:908701	TAATACGACTCACTATAGGGTATGCTCAAACTCTGCCGCAAGTCTGTCCTGCCAAGTGTAGTTGAAGGATCTCTCAGTAACTTGTAG
>A02:25M26M:908601	TAATACGACTCACTATAGGGGAGGATCATCGGGCTCGTCAGGGAACTCACGTTATTATCTCGTAATAGATCTCTCAGTAACTTGTAG
>A02:25M26M:900451	TAATACGACTCACTATAGGGTTAATTTGTTTTAGAAGTTTCAACTCAAAAGCCGACCACTTGGCTCGGATCTCTCAGTAACTTGTAG
>A02:25M26M:900101	TAATACGACTCACTATAGGGCTTTAGTTCAACAAATTCAAAACAATAGAAGGACCGACAGATCTCTAGATCTCTCAGTAACTTGTAG
>A02:25M26M:899951	TAATACGACTCACTATAGGGTACTTAGGAAGGACATGGACAAATTTGAGTTCGGTTTGAAAGGCCAAGATCTCTCAGTAACTTGTAG
>A02:25M26M:899801	TAATACGACTCACTATAGGGTACTCGAGTATGAGTAAACCAATCTAAACTGTATAGAATTTCAACCCGATCTCTCAGTAACTTGTAG
>A02:25M26M:899701	TAATACGACTCACTATAGGGAAGTAGTGACAACTACAACTTCACATTGTCTACCACTACCACCAATCGATCTCTCAGTAACTTGTAG
>A02:25M26M:899601	TAATACGACTCACTATAGGGGCTCCACCACTTGAATCTGATTGCAAGTAAAAGATAAATTAGTGGGAGATCTCTCAGTAACTTGTAG
>A02:25M26M:899451	TAATACGACTCACTATAGGGGTTCCACGTAGAGAGCGATAATGGATTTAGCGGATATGTAATTGGTAGATCTCTCAGTAACTTGTAG
>A02:25M26M:899001	TAATACGACTCACTATAGGGGAAACATAGAGTATCTTTTTTTGTAGTTTTGCGAGAGTTTAAGTTTCGATCTCTCAGTAACTTGTAG
>A02:25M26M:898751	TAATACGACTCACTATAGGGTAGTTTACTTCGTTTCTTCCTGCTTGCTTAATCGCACCTACTTTCTTGATCTCTCAGTAACTTGTAG
>A02:25M26M:898651	TAATACGACTCACTATAGGGCTATTGGGCCAGCTTATATTACATGGGCCTAATTGGTGCCAGTTAACGATCTCTCAGTAACTTGTAG
>A02:25M26M:898501	TAATACGACTCACTATAGGGAGAATATGACTTTAGATAAGATCACCATGGTGTCCCAAAGATCTAGTGATCTCTCAGTAACTTGTAG
>A02:25M26M:898301	TAATACGACTCACTATAGGGTGCAAAATGATGAGGATAATGAAATGGAGGCATGATCCTGACATGTTGATCTCTCAGTAACTTGTAG
>A02:25M26M:898001	TAATACGACTCACTATAGGGTTCATAAAAACAGCTATTCTTGTTCGAATCATGTCGGATGTAACTTTGATCTCTCAGTAACTTGTAG
>A02:25M26M:897901	TAATACGACTCACTATAGGGTCTTTTTCCACGCACATGCAATTATATATTTATATATATGGTCCACTGATCTCTCAGTAACTTGTAG
>A02:25M26M:897751	TAATACGACTCACTATAGGGCAGCAGTAGCGAATCCGGCTGGACTACGTATATTTCTTCACCTATGGGATCTCTCAGTAACTTGTAG
>A02:25M26M:897551	TAATACGACTCACTATAGGGCGAGCAATAGAGGGAGAAGCAGAGAATGTATTGTTTTAAGGAATGGGGATCTCTCAGTAACTTGTAG
>A02:25M26M:897301	TAATACGACTCACTATAGGGTGGGGTTTTTTGATGCCTCAGGCAAAGGGTGTGTGATGATTTTTATCGATCTCTCAGTAACTTGTAG
>A02:25M26M:897051	TAATACGACTCACTATAGGGGAACGGCTGTTTCTTACGCTACATGTTCTTTTCATGGGAAGATATATGATCTCTCAGTAACTTGTAG
>A02:25M26M:896851	TAATACGACTCACTATAGGGTTTACTTATTTAGAGAAAATAGGCTTGGAAATTATTGGGTGGAAAAGGATCTCTCAGTAACTTGTAG
>A02:25M26M:896751	TAATACGACTCACTATAGGGTAAGGCATGTGTGGTGGAAACGTATCCTTCGAGGCAACTTCTCCATTGATCTCTCAGTAACTTGTAG
>A02:25M26M:896601	TAATACGACTCACTATAGGGATGGATCCACCGCAGACACATGACAGCAACATGCATGGGAACTCTTCGATCTCTCAGTAACTTGTAG
>A02:25M26M:896351	TAATACGACTCACTATAGGGTGTAACCACTCTTGTTTATTTTCTCAGTTTATTTCGAGGAAGTGAAAGATCTCTCAGTAACTTGTAG
>A02:25M26M:896201	TAATACGACTCACTATAGGGAACGAAAAAAATTGTATGGAATTGCAGAAGAACTAATGGTCAAACAAGATCTCTCAGTAACTTGTAG
>A02:25M26M:894001	TAATACGACTCACTATAGGGTCTCGGTTGAGTAACGATTCTTCGGTAAAATTGGGATTAGAAGAGAAGATCTCTCAGTAACTTGTAG
>A02:25M26M:893751	TAATACGACTCACTATAGGGAGAGACAAAGATTGAGATGATTCTTGAAACAATACGTAAAGTAAATGGATCTCTCAGTAACTTGTAG
>A02:25M26M:893551	TAATACGACTCACTATAGGGATACTGAGACTAAAGGCTTTGATTTGTTTCACACTTGCTGACAAAATGATCTCTCAGTAACTTGTAG
>A02:25M26M:893451	TAATACGACTCACTATAGGGCAGGAGCAAGCGATCGACCAGCAAAATCGATCGTTTATTTTGTATATGATCTCTCAGTAACTTGTAG
>A02:25M26M:893301	TAATACGACTCACTATAGGGTTCTTCCAACTTTATTGGGTAATTTACGTTTTGAAAAGTTGTCTTTCGATCTCTCAGTAACTTGTAG
>A02:25M26M:892401	TAATACGACTCACTATAGGGAGTAGACTGCAACGTGGAACGGTGGAGGTCTTACTAGGTGTAAATATGATCTCTCAGTAACTTGTAG
>A02:25M26M:892201	TAATACGACTCACTATAGGGTTTCAGTCTTCCACTACATTACGATCTGCGTGCTCGATTCCACAAAGGATCTCTCAGTAACTTGTAG
>A02:25M26M:892101	TAATACGACTCACTATAGGGTTAAAGGAAATGTTATGTGCGATCGTAGGTTTCTTGGCTAGTAAGCTGATCTCTCAGTAACTTGTAG
>A02:25M26M:892001	TAATACGACTCACTATAGGGTGTTGACCCACTCATTTCGTAAGATTTTATCGTACGTAAGATTGTTTGATCTCTCAGTAACTTGTAG
>A02:25M26M:891551	TAATACGACTCACTATAGGGATGCATTTCTAGCAGATAGCATAACTAACGATAACGACGCTAATGTTGATCTCTCAGTAACTTGTAG
>A02:25M26M:890501	TAATACGACTCACTATAGGGATGTATGGTACACAACATATAGTAGCACAAACCAGTAGATTACATGCGATCTCTCAGTAACTTGTAG
>A02:25M26M:889901	TAATACGACTCACTATAGGGACAGATAAGCTTCTCCTTGGTCTTTGCCAGTTATAATCAAATTTAGAGATCTCTCAGTAACTTGTAG
>A02:25M26M:889801	TAATACGACTCACTATAGGGTGTCCAAAAGATAATCACATGTAACTGATGTCAGCATACATAAAATAGATCTCTCAGTAACTTGTAG
>A02:25M26M:889701	TAATACGACTCACTATAGGGTTGTAATATGAAGCAGAACATACACCACCTTACTCTGTCCCCATCACGATCTCTCAGTAACTTGTAG
>A02:25M26M:889601	TAATACGACTCACTATAGGGTAGTGTTTTTAGTTTTTAAAATTACTGCATCCTCTTGGAGTCTTGGTGATCTCTCAGTAACTTGTAG
>A02:25M26M:889451	TAATACGACTCACTATAGGGGCAAGAGAAAGGGCTTTGAATTTTCATATCACTAATCACCTGCTTTAGATCTCTCAGTAACTTGTAG
>A02:25M26M:888901	TAATACGACTCACTATAGGGAAAAGCTTTGGGAATTTTGATCGAGTTATTGGGGTTATGAAGAGAGCGATCTCTCAGTAACTTGTAG
>A02:25M26M:888651	TAATACGACTCACTATAGGGTAAATTTTCAGTCAATTGATAAAAAAAATTGACAAACTCGGACAGGGGATCTCTCAGTAACTTGTAG
>A02:25M26M:888451	TAATACGACTCACTATAGGGGGCCATGGGTGTTAAAAAAAGAACATAAAGCTAACGATAATACCTTTGATCTCTCAGTAACTTGTAG
>A02:25M26M:888251	TAATACGACTCACTATAGGGAGACTGTAGTTATTCGACCACATTACATAAAGTAAAGGTATCCGAGGGATCTCTCAGTAACTTGTAG
>A02:25M26M:888151	TAATACGACTCACTATAGGGGTATCATCGATCATCTCCATAAATTTTATAGACAGATATAAACAGGTGATCTCTCAGTAACTTGTAG
>A02:25M26M:887701	TAATACGACTCACTATAGGGTTCTTAGAAGTTATTCATCGTTCAAACCCAACTGTGTTTTGCGTCAAGATCTCTCAGTAACTTGTAG
>A02:25M26M:887601	TAATACGACTCACTATAGGGCTATTCAACTTGTCATTAAAACCTTTAGTACCGTATCCATGTTTTAGGATCTCTCAGTAACTTGTAG
>A02:25M26M:887251	TAATACGACTCACTATAGGGACCAAGCAAGAGGGTTAAGAACAACTTGAATACATATCTTAGGTCATGATCTCTCAGTAACTTGTAG
>A02:25M26M:886751	TAATACGACTCACTATAGGGAATATACGTGTTGTACTATCTACCCATATATGGTGGGTAAAGATAAAGATCTCTCAGTAACTTGTAG
>A02:25M26M:886501	TAATACGACTCACTATAGGGTAGCTTTGAAAACGCAATATACGCACCGTATGAAGATAACAACAAAAGATCTCTCAGTAACTTGTAG
>A02:25M26M:886251	TAATACGACTCACTATAGGGAGTTTGCTCCCTCTTTTATGCCTTTCTACCCCTTTGATTTTTCTTGCGATCTCTCAGTAACTTGTAG
>A02:25M26M:886101	TAATACGACTCACTATAGGGTCGGTAGGGAACCTTGAACAGTTGAATACCTAGTAATGGGGATTTTTGATCTCTCAGTAACTTGTAG
>A02:25M26M:885701	TAATACGACTCACTATAGGGCACTAAATCTTACCTTGTTGTGGATTGCATTATCTGCATGTTATGGAGATCTCTCAGTAACTTGTAG
>A02:25M26M:885601	TAATACGACTCACTATAGGGTATCTTTTTATTTCTGTTGGCAGGAAAAGCAATGATTAAACTGAAACGATCTCTCAGTAACTTGTAG
>A02:25M26M:874351	TAATACGACTCACTATAGGGTAAAAAACTAAGTTTATTCCCGAAAATAAGGTATGGTTGTTTGGTTCGATCTCTCAGTAACTTGTAG
>A02:25M26M:874151	TAATACGACTCACTATAGGGTGGATTGGATTGAAATTTATATGAAAGTAACATCCCAATCTTGAGAGGATCTCTCAGTAACTTGTAG
>A02:25M26M:873901	TAATACGACTCACTATAGGGACGTTCTTTCTCTATACTTCTTCCCAAATGAAAATGGTCTTAACAAAGATCTCTCAGTAACTTGTAG
>A02:25M26M:873651	TAATACGACTCACTATAGGGTACATGTCTGAATAGGCTTAAGCATATGTTGACATGTCAGTAGTAATGATCTCTCAGTAACTTGTAG
>A02:25M26M:873551	TAATACGACTCACTATAGGGTTTGCTTTTGGGATGATATGCGTCTCTTTTGAAATAATTATTTCGTAGATCTCTCAGTAACTTGTAG
>A02:25M26M:870001	TAATACGACTCACTATAGGGAGTTTTGCTTTCTTGCGCACAGTGCAACTATTCGATTCAGCGATGATGATCTCTCAGTAACTTGTAG
>A02:25M26M:869801	TAATACGACTCACTATAGGGGAATGAGTTTCGTGTAATCAATCATTAGCCATCGTCATCGAGACAAAGATCTCTCAGTAACTTGTAG
>A02:25M26M:869551	TAATACGACTCACTATAGGGAACCTCGTCTCTGCTCAATTTTAAGGTCAAAGTTCTCTCCTTTAAGTGATCTCTCAGTAACTTGTAG
>A02:25M26M:869451	TAATACGACTCACTATAGGGATAACCAGTATCCACAGATGACGATGGATGATGCTTCTCCGAGTCAAGATCTCTCAGTAACTTGTAG
>A02:25M26M:869351	TAATACGACTCACTATAGGGCAAATCTCAGGGAGAAGAAGTTGCAGCTTACGACGAATTCAACGGCGGATCTCTCAGTAACTTGTAG
>A02:25M26M:869251	TAATACGACTCACTATAGGGATCATGGCCTTGCCCGCCACGATGAAGATCCTGGGGCTTGTGCTCGGGATCTCTCAGTAACTTGTAG
>A02:25M26M:869101	TAATACGACTCACTATAGGGGGTGATTCTTTTGGGAAACCTGGGAAGGTTTTGCTTCAGGTCGCTGTGATCTCTCAGTAACTTGTAG
>A02:25M26M:868801	TAATACGACTCACTATAGGGGTGATGTATTGGCTGGGAAGACAGAAGATGGGACTCATCATCATGGTGATCTCTCAGTAACTTGTAG
>A02:25M26M:868601	TAATACGACTCACTATAGGGATGTATGTGTTCTTTGCAGATTCTTTGAGATTTACATCTGCTTTATCGATCTCTCAGTAACTTGTAG
>A02:25M26M:868501	TAATACGACTCACTATAGGGAACTGATCAGTGGCGGCGTGGCGATGCCAAGATTGCTACCAGATGTTGATCTCTCAGTAACTTGTAG
>A02:25M26M:868401	TAATACGACTCACTATAGGGCGCATTCATTTGCCATTACAATGGTATGTACACTCTGTTCTTTATTAGATCTCTCAGTAACTTGTAG
>A02:25M26M:868351	TAATACGACTCACTATAGGGTAATCAACAAAAACTCATGTTCTTTGTTTTGCCTTCAGTTCACAGCAGATCTCTCAGTAACTTGTAG
>A02:25M26M:868251	TAATACGACTCACTATAGGGCTCATGCTATGCTCATCTGTTTACATAATGACGAGCATTTTCGGGTTGATCTCTCAGTAACTTGTAG
>A02:25M26M:868151	TAATACGACTCACTATAGGGACCTTGGAATCCCTTTTGGTTCTGTCCTTAACGACGCGGTTCGAGTCGATCTCTCAGTAACTTGTAG
>A02:25M26M:868051	TAATACGACTCACTATAGGGGATCAACATTGACGGCCTCTTTTTCCCTTCCTCTCCATCGTTAACTTGATCTCTCAGTAACTTGTAG
>A02:25M26M:867401	TAATACGACTCACTATAGGGTCTGTTGTGTTCTTTTGCAGGGATCGTCATAGCAGAGCAACAGGCAGGATCTCTCAGTAACTTGTAG
>A02:25M26M:867301	TAATACGACTCACTATAGGGTCGCCATTTACAGCGATGCTTATGCGTTATTCAAAAAGCACACACATGATCTCTCAGTAACTTGTAG
>A02:25M26M:867101	TAATACGACTCACTATAGGGATACAGATACCTATTTGGTTATATCAACAACCAAATCAAGTTGTTTGGATCTCTCAGTAACTTGTAG
>A02:25M26M:866901	TAATACGACTCACTATAGGGCACTTAGCTGTTGCTGTAGGTTTGAAACAATCTATGTTGCACAAACTGATCTCTCAGTAACTTGTAG
>A02:25M26M:866751	TAATACGACTCACTATAGGGCTGTCAATGCTATTCCTGGCTTTCTCTGTTTGTATCTGCTGTTCTGTGATCTCTCAGTAACTTGTAG
>A02:25M26M:866701	TAATACGACTCACTATAGGGATTACCATCAACACTTTTCCTCGTTCTTTCTCTCTTATCAACGCTGGGATCTCTCAGTAACTTGTAG
>A02:25M26M:866601	TAATACGACTCACTATAGGGATACTTGTTCTTGACTTCTCTCTTTGGTCTGTGCTTGGCCTTGCAGGGATCTCTCAGTAACTTGTAG
>A02:25M26M:866351	TAATACGACTCACTATAGGGCGTGAGACCACTTCACAACATCATCTGATGTTCCCTGCACACCAACCGATCTCTCAGTAACTTGTAG
>A02:25M26M:866251	TAATACGACTCACTATAGGGTACGCACGTGAATCACCAGCACTGGACATTTGACAGAAGATATCTTAGATCTCTCAGTAACTTGTAG
>A02:25M26M:865951	TAATACGACTCACTATAGGGAACATTATATTGCTCCTCCAAGCATCTGTACACTGCTTCTATATCGTGATCTCTCAGTAACTTGTAG
>A02:25M26M:865801	TAATACGACTCACTATAGGGCTGAAGACCTCCCATAACCTGAATAATCATACCTGCATAAAAAAAACGATCTCTCAGTAACTTGTAG
>A02:25M26M:865251	TAATACGACTCACTATAGGGATTTCAAACAATGGATCTCAGTTATGTATGGTGTAAGAACTCAGATCGATCTCTCAGTAACTTGTAG
>A02:25M26M:865151	TAATACGACTCACTATAGGGTCAAGATGTGCAGCAGACACTACTTGTCCTAAACAAAAGCTTGTCCTGATCTCTCAGTAACTTGTAG
>A02:25M26M:865001	TAATACGACTCACTATAGGGTCTGGCCTAGATCAGCAGCGTTGCCGTGAGAATAAAGAAGCGTGAGTGATCTCTCAGTAACTTGTAG
>A02:25M26M:864901	TAATACGACTCACTATAGGGCTTCAGCTTCAACACTTCAACGTTCTCCTTCACGTTCTCCACACCCGGATCTCTCAGTAACTTGTAG
>A02:25M26M:864801	TAATACGACTCACTATAGGGTTCGGTGGGAAAAACGCAAACTTCGCCGCCATAGATGACGTCACACCGATCTCTCAGTAACTTGTAG
>A02:25M26M:864501	TAATACGACTCACTATAGGGTCAAACTTTGATCTAGATTTGGTTGACTGGATGGATGATTGTGTTTTGATCTCTCAGTAACTTGTAG
>A02:25M26M:864351	TAATACGACTCACTATAGGGTGTAATCAGAAGATTTTGAATTAATGCAATTTTCACGGAGGAGAAGCGATCTCTCAGTAACTTGTAG
>A02:25M26M:864201	TAATACGACTCACTATAGGGAAATGAAATAATATTCATAATAGGTTTGGCTATTTGGGATGTGACTGGATCTCTCAGTAACTTGTAG
>A02:25M26M:864101	TAATACGACTCACTATAGGGAATTACACTACGTGTCACTCTAGGAGATGTGCTAGTTTTTAGATCTTGATCTCTCAGTAACTTGTAG
>A02:25M26M:864001	TAATACGACTCACTATAGGGGATCTAACAGAAATGATTTGACTCATCTTTGGTCTTTGGTTTAGATTGATCTCTCAGTAACTTGTAG
>A02:25M26M:863751	TAATACGACTCACTATAGGGATGTTTTGATTAGTGGCACGCACGGGAGAGATGTGGGGGAATAACTTGATCTCTCAGTAACTTGTAG
>A02:25M26M:863551	TAATACGACTCACTATAGGGCATTAGATAATAAAATGTACTGATTCCACAACATTTCATGCGTTTTGGATCTCTCAGTAACTTGTAG
>A02:25M26M:863451	TAATACGACTCACTATAGGGTTGGACATCAATCAATATGTAAAACATAAGTGATGATGTGCTCGTGAGATCTCTCAGTAACTTGTAG
>A02:25M26M:863351	TAATACGACTCACTATAGGGCGGGCTTCTTAACGCATGAAGTTTTCTCTGTCATGGAAATATATTTGGATCTCTCAGTAACTTGTAG
>A02:25M26M:863251	TAATACGACTCACTATAGGGTATCAGCTGTAGCTCAATTCGTTTTGGTCGATGCATGCGAGTAGTTAGATCTCTCAGTAACTTGTAG
>A02:25M26M:863151	TAATACGACTCACTATAGGGATTTGTAATGAAACTAGTACTTGCACGGTTTTTGGCAAAACAGACGAGATCTCTCAGTAACTTGTAG
>A02:25M26M:863001	TAATACGACTCACTATAGGGTCTAGTAATTAAAACGAGGCTTTCACAGGGAAACCAACACGTAAGAAGATCTCTCAGTAACTTGTAG
>A02:25M26M:862851	TAATACGACTCACTATAGGGGTTTAGCAATATATGGGTAGAGTCTCTGTAATACTTTTTAGTAAATCGATCTCTCAGTAACTTGTAG
>A02:25M26M:862751	TAATACGACTCACTATAGGGCACTTCATTTGATGCACTTCCTCGTGCCTTCTTCGTTTGCATCTTGTGATCTCTCAGTAACTTGTAG
>A02:25M26M:862551	TAATACGACTCACTATAGGGAACTTGCCTACGCGTTTTATTTTTATGAAATTATGAGCTCCTAATTCGATCTCTCAGTAACTTGTAG
>A02:25M26M:862351	TAATACGACTCACTATAGGGCAACGTATTTTTTGTGCTAAGACTCTTAACATATTCTTACATATGCTGATCTCTCAGTAACTTGTAG
>A02:25M26M:860401	TAATACGACTCACTATAGGGCTTTGGTTTTGTATAGCACACAAAGGAAAAAATCCGTGTGCCGGATTGATCTCTCAGTAACTTGTAG
>A02:25M26M:860301	TAATACGACTCACTATAGGGAAGTCTGAACTCTGGACTCTGGATACTGAAGATTCTCAATGATCCATGATCTCTCAGTAACTTGTAG
>A02:25M26M:860101	TAATACGACTCACTATAGGGCGGATTGTTAATGGAAAAAAAAAACAGACGGATTTCTTTTGGCTAGGGATCTCTCAGTAACTTGTAG
>A02:25M26M:859001	TAATACGACTCACTATAGGGACCCCAAAAAAAAAACTTTAACCTATGACACCATCAACTGATTTCTCGATCTCTCAGTAACTTGTAG
>A02:25M26M:858901	TAATACGACTCACTATAGGGCAGATGCACCTAGAAGTACTAATATTCTTTTTGTTATTACTAGACGAGATCTCTCAGTAACTTGTAG
>A02:25M26M:858801	TAATACGACTCACTATAGGGAAAAAAAATCAGAACTGTAACTAATCGTATTGAGCTCACTTCCCTCAGATCTCTCAGTAACTTGTAG
>A02:25M26M:858651	TAATACGACTCACTATAGGGTAGCAGTAGCTTTCCTTATTATCATTCATGCCCTAAAAGACGACCATGATCTCTCAGTAACTTGTAG
>A02:25M26M:858451	TAATACGACTCACTATAGGGTATCTCTCGATTTGTTTTGATAGGCGGAGATGCTGGTCATAAAAGTCGATCTCTCAGTAACTTGTAG
>A02:25M26M:858301	TAATACGACTCACTATAGGGATAACAGGATTCCCACGACTTCACCAGCACTGGAGCACCGAGGAAACGATCTCTCAGTAACTTGTAG
>A02:25M26M:858201	TAATACGACTCACTATAGGGGTAAGGGCGACGAATAATCATGATTTGAGTATAAAGATTTCATCAGGGATCTCTCAGTAACTTGTAG
>A02:25M26M:858051	TAATACGACTCACTATAGGGTTTGTAGCTTTCTATGATGATTATCGTGGACCAGCACGTCATCCTCCGATCTCTCAGTAACTTGTAG
>A02:25M26M:857801	TAATACGACTCACTATAGGGCTTCATTCAAGATATGTTTTGGCTTTATTGCAGGAGAACATAAGAAGGATCTCTCAGTAACTTGTAG
>A02:25M26M:857651	TAATACGACTCACTATAGGGCATAATAAATATTGGCAGCATGTCGATGATCTCACCAACGGTAATAGGATCTCTCAGTAACTTGTAG
>A02:25M26M:856951	TAATACGACTCACTATAGGGATTTTCTTCAGCCAAGGATATGAAGAAACTTGCTCGACTGTTACGCAGATCTCTCAGTAACTTGTAG
>A02:25M26M:857501	TAATACGACTCACTATAGGGCCTGTCCATAACCGAGCTCCCGACAAGATTTAAGTGATTGTTGATCGGATCTCTCAGTAACTTGTAG
>A02:25M26M:857401	TAATACGACTCACTATAGGGAGGTACGTAGTTAACTATGTTGGTCCCAGTTTTGTTTCTGTGTATAGGATCTCTCAGTAACTTGTAG
>A02:25M26M:856701	TAATACGACTCACTATAGGGAACAATATAGCAAGCTAGGATTGAGGAGCGCTATCTTTTGTTTCTTGGATCTCTCAGTAACTTGTAG
>A02:25M26M:856351	TAATACGACTCACTATAGGGTATGACTCTTATCTTTTTTGAATCATGTACTTTCTCCCTGTAAGAACGATCTCTCAGTAACTTGTAG
>A02:25M26M:856451	TAATACGACTCACTATAGGGAAGATAGCGCTCCTCAATCCTAGCTTGCTATATTGTTACTGTATTACGATCTCTCAGTAACTTGTAG
>A02:25M26M:855851	TAATACGACTCACTATAGGGACCTTCAAGATCGAGATTTAAATGTTCTTGTTGGGTTACTGGTGCCGGATCTCTCAGTAACTTGTAG
>A02:25M26M:855751	TAATACGACTCACTATAGGGGTTGATCCTATCACACTTTTTGTCATGCCACATATCCGTTTCATTTGGATCTCTCAGTAACTTGTAG
>A02:25M26M:855651	TAATACGACTCACTATAGGGGCGAGAGAAAATCATATAAAACATTTCTCAGTCTCCATATTAAAGGTGATCTCTCAGTAACTTGTAG
>A02:25M26M:855451	TAATACGACTCACTATAGGGGCATATTCTATGCAAGTCAATGAATCCATTTAAATATGTATTACGCAGATCTCTCAGTAACTTGTAG
>A02:25M26M:855201	TAATACGACTCACTATAGGGAAGACTTGAATCAAAGGGATGAAACTCGACGTGAAAACTGGACCTCTGATCTCTCAGTAACTTGTAG
>A02:25M26M:855101	TAATACGACTCACTATAGGGCCTATACATGTACCGATCATAGTTGGGAAATATATAAGCATATATTTGATCTCTCAGTAACTTGTAG
>A02:25M26M:854901	TAATACGACTCACTATAGGGATAGTCCGCACATTTCCTTTGTAGATTAAAAGATCATTCACAACGGAGATCTCTCAGTAACTTGTAG
>A02:25M26M:854801	TAATACGACTCACTATAGGGTGTAAAAGCATTAAGCTTAAGGCACATAATGAATCAGACAGAATAGAGATCTCTCAGTAACTTGTAG
>A02:25M26M:854701	TAATACGACTCACTATAGGGGACAAAACTTGGAACCTCTCTTTAAGGACCCACATGGATATGCTTCTGATCTCTCAGTAACTTGTAG
>A02:25M26M:854601	TAATACGACTCACTATAGGGTCGTGGTGCTCGTGTATTTGCACGGATAAGTTTGGCATATTTTTCCTGATCTCTCAGTAACTTGTAG
>A02:25M26M:854401	TAATACGACTCACTATAGGGGTAAGCACCAAAGCTCCACAAACGCAAATCATTGTGCCCAACACTTTGATCTCTCAGTAACTTGTAG
>A02:25M26M:854151	TAATACGACTCACTATAGGGAAAGTAGAAGATGTATTATGTAGTCCAACAAGAAAGAAGTATTGCACGATCTCTCAGTAACTTGTAG
>A02:25M26M:853701	TAATACGACTCACTATAGGGCAACTTCAAAGATCTGAACTAGCTAATCAACAACCCAAGAAAAGATTGATCTCTCAGTAACTTGTAG
>A02:25M26M:853551	TAATACGACTCACTATAGGGCAGATAAAAACACATACCTTTCCAAGAAAATTGCAAATGGTATCAAGGATCTCTCAGTAACTTGTAG
>A02:25M26M:853351	TAATACGACTCACTATAGGGACCATAATTAATTATGTGTATCACAGTATGTGTGCGTGTATGTATATGATCTCTCAGTAACTTGTAG
>A02:25M26M:853301	TAATACGACTCACTATAGGGTATATGTAGACAGTTGTCTTTATGTAGTTTTCAGAAGTTGGTATGAAGATCTCTCAGTAACTTGTAG
>A02:25M26M:853151	TAATACGACTCACTATAGGGTTTGGTCATTGTTACGTTCAACTAGTCATGACCAGAAGGAAAGAGAGGATCTCTCAGTAACTTGTAG
>A02:25M26M:853051	TAATACGACTCACTATAGGGCTCCATTATCACAACGTGACATCATATTCCAATTCACTATACATATAGATCTCTCAGTAACTTGTAG
>A02:25M26M:847951	TAATACGACTCACTATAGGGCAACTTGCCGTCTATCGTATAGAGTATCCAATTCTTATTGATAATATGATCTCTCAGTAACTTGTAG
>A02:25M26M:847601	TAATACGACTCACTATAGGGCGCACGTTTTAATTTGATTGAATTTAGTTTAGCTTTATGTAGAGCCCGATCTCTCAGTAACTTGTAG
>A02:25M26M:166901	TAATACGACTCACTATAGGGTCATATGGTTTTACCGTATTGTGATTTGTCTTCAAGTTAATCACCACGATCTCTCAGTAACTTGTAG
>A02:25M26M:846751	TAATACGACTCACTATAGGGATCCTGTCTCAATGTGTGATTCTTTTGCTTAGCTCTAAGTATCTTCCGATCTCTCAGTAACTTGTAG
>A02:25M26M:844951	TAATACGACTCACTATAGGGCCTATATACATTATTAATTTCAACCATCCATTTCATCCCTCTATTCGGATCTCTCAGTAACTTGTAG
>A02:25M26M:844851	TAATACGACTCACTATAGGGCCTGATGCTTTTATCACATTTTCAAACATATGTAAGTTGTTCGGATTGATCTCTCAGTAACTTGTAG
>A02:25M26M:838851	TAATACGACTCACTATAGGGCTTGCTGATCATAAGCTTCCAGCATTGCTTTCTTATGCCTGAAAAAAGATCTCTCAGTAACTTGTAG
>A02:25M26M:838401	TAATACGACTCACTATAGGGAGGCACATGGGTTTCACTCGGGGTTTCCGGGTCCGGGTTGAACCGTTGATCTCTCAGTAACTTGTAG
>A02:25M26M:826151	TAATACGACTCACTATAGGGACGCATCCTTGATATTTTCGTTGCCACGATCATGGTGTGTATCATTTGATCTCTCAGTAACTTGTAG
>A02:25M26M:825001	TAATACGACTCACTATAGGGGTAATTTCCCTATATCAGATGCTTTCGATTAGCCAAGACATGACAAGGATCTCTCAGTAACTTGTAG
>A02:25M26M:824851	TAATACGACTCACTATAGGGGCAACAAGAGTTTTAGAAAGGTTCACCAACTAGAAAGTCTAAGATTAGATCTCTCAGTAACTTGTAG
>A02:25M26M:824751	TAATACGACTCACTATAGGGTTATCCGACTCCAAACCTGCAATATTGATGTTGCTGACAAAGAACACGATCTCTCAGTAACTTGTAG
>A02:25M26M:824651	TAATACGACTCACTATAGGGATTTTCTGAAATTAGTTCGAAGTTTGAAACTTGGAACATCTTACACCGATCTCTCAGTAACTTGTAG
>A02:25M26M:824501	TAATACGACTCACTATAGGGAACAAACCAAGATGACCTTGAACCTCTACTCTCCAGTGAGCCGAGGCGATCTCTCAGTAACTTGTAG
>A02:25M26M:824401	TAATACGACTCACTATAGGGTTCTCCAATTTCATTCATTTGCGATGTGTCCCTATAAGTACTACATAGATCTCTCAGTAACTTGTAG
>A02:25M26M:824251	TAATACGACTCACTATAGGGTAACACATTATAACTAGTAGTTTCATATATGCGTTGCCTAGTGAAATGATCTCTCAGTAACTTGTAG
>A02:25M26M:824151	TAATACGACTCACTATAGGGAAATAGGTCCTGGCAACAGGTGCGGTGTCTCACATGGTGGTGTTGAGGATCTCTCAGTAACTTGTAG
>A02:25M26M:823901	TAATACGACTCACTATAGGGTAGGCATAGTCAAAGGTTTTGTCATCCGTTTCACCTTCTTTGTTAGCGATCTCTCAGTAACTTGTAG
>A02:25M26M:823701	TAATACGACTCACTATAGGGATATATAGTCCAAGTATTACGATTTGTACAACCCAATCGCGAAAAAGGATCTCTCAGTAACTTGTAG
>A02:25M26M:823601	TAATACGACTCACTATAGGGAACAAAGAGTAATTATCTCTAAACCAGTATATTACCTTTTTCTGGAGGATCTCTCAGTAACTTGTAG
>A02:25M26M:823151	TAATACGACTCACTATAGGGATATTTTTTTCACCTTAAGCTTATTTGCATAGCATCAATCATCCTCAGATCTCTCAGTAACTTGTAG
>A02:25M26M:822951	TAATACGACTCACTATAGGGATGTCTTGACCGGCGTATGAACACCTCTCATATCGATCCAGAATTCTGATCTCTCAGTAACTTGTAG
>A02:25M26M:822601	TAATACGACTCACTATAGGGCATGCCCTTGAGTAAAAGGATTCTCATAAACCTACTGTCGGTAAATCGATCTCTCAGTAACTTGTAG
>A02:25M26M:822301	TAATACGACTCACTATAGGGAGAAAGTATATGGGTGCGTATATATTTTCATGTGAAGATCGAGGTTAGATCTCTCAGTAACTTGTAG
>A02:25M26M:822201	TAATACGACTCACTATAGGGAGGCTTGCCATGCTTCCAACAACATTTTACGGTATATCTTACTTCCTGATCTCTCAGTAACTTGTAG
>A02:25M26M:822051	TAATACGACTCACTATAGGGATCCATCCCTATAAAGATGATAATTTGCACATGTTCTTCCTATATATGATCTCTCAGTAACTTGTAG
>A02:25M26M:821951	TAATACGACTCACTATAGGGTCAAAAGATGAGAGCTATTGTAATTTACATGAACCTAGGACATCGGGGATCTCTCAGTAACTTGTAG
>A02:25M26M:821451	TAATACGACTCACTATAGGGCAAAGTAATCTACCTTTGAACATTATAAGATCTACTCACTGGTGCAAGATCTCTCAGTAACTTGTAG
>A02:25M26M:821351	TAATACGACTCACTATAGGGAATTTTTTCTTCAGCCATTTTCCTATAATCCCACCATTTTTGTAAGCGATCTCTCAGTAACTTGTAG
>A02:25M26M:821251	TAATACGACTCACTATAGGGGCATATGTATTCAACTTATTTGGTTTACAGTTAGCACATTCTCAACAGATCTCTCAGTAACTTGTAG
>A02:25M26M:821051	TAATACGACTCACTATAGGGTGAACTAAGCATGTGTATTAATCTCTCTCGCACACATACATGTTTGTGATCTCTCAGTAACTTGTAG
>A02:25M26M:820951	TAATACGACTCACTATAGGGCACTACCTAATTAAACCCACCACTCCCCCCCCAATCGGTCAAAACATGATCTCTCAGTAACTTGTAG
>A02:25M26M:820851	TAATACGACTCACTATAGGGTCTTAAAAGTAAATTAAGTAATAGTTCTGGAAGAAACTCAAACCTGGGATCTCTCAGTAACTTGTAG
>A02:25M26M:820701	TAATACGACTCACTATAGGGTGTTCTTCGCTTTGAAAACGTCACTTGTCTCCGTATCTTATTCTCGAGATCTCTCAGTAACTTGTAG
>A02:25M26M:820601	TAATACGACTCACTATAGGGCCAAAGAAGAAAGCTACAAGAAGACCTTAGAACCTTCACTAGGAGAAGATCTCTCAGTAACTTGTAG
>A02:25M26M:820451	TAATACGACTCACTATAGGGGTTAGACACACAATGGCATATGGAGGAAAAAAAGAGAAAGTATCAAAGATCTCTCAGTAACTTGTAG
>A02:25M26M:820151	TAATACGACTCACTATAGGGAAGAAAACTAGTATTTATGTCAATGTGACGGAAATAGTCTTCAACTAGATCTCTCAGTAACTTGTAG
>A02:25M26M:817051	TAATACGACTCACTATAGGGCAGGTTACGCTTCTTAAAAAGAGAATAACCTCCCTTTATAGTAAAATGATCTCTCAGTAACTTGTAG
>A02:25M26M:810651	TAATACGACTCACTATAGGGCGAGAAAAAAATAATGACCTCTTCCACCACTCTTGTTGACGTAATTTGATCTCTCAGTAACTTGTAG
>A02:25M26M:810551	TAATACGACTCACTATAGGGCTCTACGTCTTTAGCCAAGATGGAAAACTCATAAGATGTTTAGATCTGATCTCTCAGTAACTTGTAG
>A02:25M26M:810401	TAATACGACTCACTATAGGGAAGATGTCTCTTTGATTCTTCTAGTGATATATCTACATGTCTGATGAGATCTCTCAGTAACTTGTAG
>A02:25M26M:810251	TAATACGACTCACTATAGGGTAAAAGTCGTTTCTTCTCAAAGAGTATAAAACTAGCTAGATGATGTTGATCTCTCAGTAACTTGTAG
>A02:25M26M:809651	TAATACGACTCACTATAGGGTTTTCCCATTTGATTAATTTTATCCCATACTCCATTCGCTTTGCAAAGATCTCTCAGTAACTTGTAG
>A02:25M26M:809101	TAATACGACTCACTATAGGGCAGTTCGAAATTCAAGTAACAGACACTGGCTTATTTTCTATCATAGGGATCTCTCAGTAACTTGTAG
>A02:25M26M:807701	TAATACGACTCACTATAGGGTTAAGTGCACCCATACGCTAGTAGTAGCTGTTGAAACAAAAAGAGTGGATCTCTCAGTAACTTGTAG
>A02:25M26M:807601	TAATACGACTCACTATAGGGTAGAATTAGGCTTATATTATCTAGAAGACCCAATTTATCTGCATAGTGATCTCTCAGTAACTTGTAG
>A02:25M26M:807201	TAATACGACTCACTATAGGGATCCCATAAAAGGCCAAACTATAGGGGTTGTAAATCGTAATTGACGTGATCTCTCAGTAACTTGTAG
>A02:25M26M:807101	TAATACGACTCACTATAGGGTGCATGGGACAATACATACATATGTACACAACCCTTTATGCTTACATGATCTCTCAGTAACTTGTAG
>A02:25M26M:806901	TAATACGACTCACTATAGGGTTCATGGGTTCACATTCAAATGTGGTCCACTACACTAAAATATAACAGATCTCTCAGTAACTTGTAG
>A02:25M26M:806801	TAATACGACTCACTATAGGGTGTGTACCATTACCATCTTCCTAAAGATGGTGTACAGTTACCAACTTGATCTCTCAGTAACTTGTAG
>A02:25M26M:806651	TAATACGACTCACTATAGGGATCCGATTTCGCGGTCCCAGTAGTTAACAATTTAAAAGATAACATTTGATCTCTCAGTAACTTGTAG
>A02:25M26M:806251	TAATACGACTCACTATAGGGATAAGGAGTGAATTAGCTCATCTTTTATATTTTATATCCCATTTCGCGATCTCTCAGTAACTTGTAG
>A02:25M26M:806151	TAATACGACTCACTATAGGGACTACTACAAATATGTAAATCTCTACTCGCAAGAATCGAGTTAGGTTGATCTCTCAGTAACTTGTAG
>A02:25M26M:806101	TAATACGACTCACTATAGGGTCTGGACGGCATTTTGAAGTGTTGACCAATAACAGCAAAGTTAGGTTGATCTCTCAGTAACTTGTAG
>A02:25M26M:805501	TAATACGACTCACTATAGGGATGTGCATATAATTGGGCACCATTCTTGAATGCTCAGTTTGCACCATGATCTCTCAGTAACTTGTAG
>A02:25M26M:805401	TAATACGACTCACTATAGGGCGAACCCTCTTTTGGAAAATTAAGCTCGGTTATTATATTCAAGTGGGGATCTCTCAGTAACTTGTAG
>A02:25M26M:805351	TAATACGACTCACTATAGGGTATGACCTATTGAAACAATTAGCAAACTTACAATTTTATCAGCATCCGATCTCTCAGTAACTTGTAG
>A02:25M26M:804901	TAATACGACTCACTATAGGGAAGTACGATCACTGACTTTCATGAAAACAGCTCAACATATAAGATATGATCTCTCAGTAACTTGTAG
>A02:25M26M:804751	TAATACGACTCACTATAGGGGCTACTTTTTGTCAATATTTTGTTCGAGTGGGATTTGTTCGAGGGCCGATCTCTCAGTAACTTGTAG
>A02:25M26M:804651	TAATACGACTCACTATAGGGAGCTTGATCACCCTAAGCTACTTGTATTTATTGTACGTATTTTAGTTGATCTCTCAGTAACTTGTAG
>A02:25M26M:804601	TAATACGACTCACTATAGGGGGATGCAATACGTTTTAAGTTTGTATTTTGGGTTTAGTACTGGTTTTGATCTCTCAGTAACTTGTAG
>A02:25M26M:800901	TAATACGACTCACTATAGGGTATTGGGTCATAGGGTTTAGCAATGGAAAATTCTTGGTTGGCCAAATGATCTCTCAGTAACTTGTAG
>A02:25M26M:800351	TAATACGACTCACTATAGGGTTTTACAATGACAAGGTTAGAATTTGTTTTAGTCAAAGTGTGTGGTTGATCTCTCAGTAACTTGTAG
>A02:25M26M:800101	TAATACGACTCACTATAGGGTGTAAAATCCATTATAATTATACTACCCTGATCCACACGGCGGAGCCGATCTCTCAGTAACTTGTAG
>A02:25M26M:800001	TAATACGACTCACTATAGGGCCAGCCACCACCAAATCGGTGTGGACGATCTTCATCGTTTAGACTCCGATCTCTCAGTAACTTGTAG
>A02:25M26M:799901	TAATACGACTCACTATAGGGGCTGTAACACTTTGAGGCATATGAAATTGGTCGTGAATGACACTAGTGATCTCTCAGTAACTTGTAG
>A02:25M26M:799801	TAATACGACTCACTATAGGGTTCGAGATACCATCTGAGATCGTTGATTATGTGGTTGCGGTTGCATAGATCTCTCAGTAACTTGTAG
>A02:25M26M:799651	TAATACGACTCACTATAGGGGTCCTGGTAAATATCTTGCAATTGTAGACCACCTATATATATATATAGATCTCTCAGTAACTTGTAG
>A02:25M26M:797551	TAATACGACTCACTATAGGGCGTCATCAAAAATAAAATACAAAAATAAGGAGCTTACTTGTTACCCCGATCTCTCAGTAACTTGTAG
>A02:25M26M:797401	TAATACGACTCACTATAGGGGCCACTTCTATTCAACCCTAATTTTCAATTCCATGACAAACACAAAAGATCTCTCAGTAACTTGTAG
>A02:25M26M:797251	TAATACGACTCACTATAGGGCGCAGTAAAATGTTCGAATAAAAAAGATTGTATACGTACAAATGTTCGATCTCTCAGTAACTTGTAG
>A02:25M26M:797101	TAATACGACTCACTATAGGGCCTGTTTCTAACTATAAAAGTGTGAGACTGCTTATACATAAAAAAGAGATCTCTCAGTAACTTGTAG
>A02:25M26M:796551	TAATACGACTCACTATAGGGGTCTGTACGAGCTTATGATAAAGCAACGATGAAGATTATAGAGTAATGATCTCTCAGTAACTTGTAG
>A02:25M26M:796451	TAATACGACTCACTATAGGGCAAATATATATGTATACATGATCAAATAAAAGGGTTTACCTGCACACGATCTCTCAGTAACTTGTAG
>A02:25M26M:796351	TAATACGACTCACTATAGGGAAGCTTGTCTTCTGCAGGTGTCCATGGACCCTTTCTAAATCCTTGTAGATCTCTCAGTAACTTGTAG
>A02:25M26M:796251	TAATACGACTCACTATAGGGTGATCAGCTCCCAAATCAAGCATACCTCTTCAATTGTCAGGAACTCTGATCTCTCAGTAACTTGTAG
>A02:25M26M:796151	TAATACGACTCACTATAGGGGAGTATGTGCTTGATTTGTTCTACTATGTTCATGTTTGTGGTTGAACGATCTCTCAGTAACTTGTAG
>A02:25M26M:795401	TAATACGACTCACTATAGGGTATAATCAGGTAGCATATATATGTGAATTTATGGTCTATCATTAGCCGATCTCTCAGTAACTTGTAG
>A02:25M26M:795301	TAATACGACTCACTATAGGGGCAAGCCACTATCAAACAAGTGTTGATACATAATGAGAACCAGCTCAGATCTCTCAGTAACTTGTAG
>A02:25M26M:793351	TAATACGACTCACTATAGGGACTTTGAGCCAGTAAAACCTCAACACATGTCTAATAAAATAATGAAAGATCTCTCAGTAACTTGTAG
>A02:25M26M:793251	TAATACGACTCACTATAGGGATGTACAATTATGCTCGAAATAATGGGCTTAATGAAGTGTATACTATGATCTCTCAGTAACTTGTAG
>A02:25M26M:793101	TAATACGACTCACTATAGGGATGTTCGGGTTTTCTTGAATTGGTTAAACTGATTCAACCTTATTTTAGATCTCTCAGTAACTTGTAG
>A02:25M26M:793001	TAATACGACTCACTATAGGGATCAATTTATCTGGGAGATTGCAACTTCCCCTTGCTCACGAAATTTAGATCTCTCAGTAACTTGTAG
>A02:25M26M:792851	TAATACGACTCACTATAGGGAAGCTTTTCATGCAGCTTTCACTTTAGATTTCGAAGTAAAATGTGGGGATCTCTCAGTAACTTGTAG
>A02:25M26M:785101	TAATACGACTCACTATAGGGATGCTTCTATATTCTAGCTTGGCACACCGTTATCTATGAGTTGTGGAGATCTCTCAGTAACTTGTAG
>A02:25M26M:788301	TAATACGACTCACTATAGGGCAATCGGTATCACACTGATCAGTCCAGCTTACCTTCTCACATTATTCGATCTCTCAGTAACTTGTAG
>A02:25M26M:784951	TAATACGACTCACTATAGGGGCCATCGAATCCGACCTTTCTAGTAGCTTCTCCAACTGTGGTATAATGATCTCTCAGTAACTTGTAG
>A02:25M26M:784801	TAATACGACTCACTATAGGGTTGAAGATGTTTCGATGATTTTCCACACATGAAGGATTAGGACCACAGATCTCTCAGTAACTTGTAG
>A02:25M26M:784701	TAATACGACTCACTATAGGGAATAAGTTAATTGAATTGAGGGTGAATGAGGTGTAAGACCCATTGAAGATCTCTCAGTAACTTGTAG
>A02:25M26M:784601	TAATACGACTCACTATAGGGAATATTCAGTCTAATGTCTCAATTATTTACGTGTGCGGACGATTAAAGATCTCTCAGTAACTTGTAG
>A02:25M26M:784051	TAATACGACTCACTATAGGGAATATTTCCGTGTATTCAAGTTTTTCCACAGCATAATTGGAGCCTTTGATCTCTCAGTAACTTGTAG
>A02:25M26M:783951	TAATACGACTCACTATAGGGGACGTAGAATTGATGCAAGAAGAGGTTGTGAAACTAAATGGTTTGCCGATCTCTCAGTAACTTGTAG
>A02:25M26M:783851	TAATACGACTCACTATAGGGATTCGTTTTTAAGTATACTTGTCGTCAATAAGTCCAATGGGGGCTATGATCTCTCAGTAACTTGTAG
>A02:25M26M:783401	TAATACGACTCACTATAGGGTATTAGCTTCTTCTATATTCCTCTGTACATAATCCATCTCCTCTAAGGATCTCTCAGTAACTTGTAG
>A02:25M26M:783201	TAATACGACTCACTATAGGGCTCCCTTCTCCTCCCATCTGCACAAAAATCAGAACATTAAGATCTCAGATCTCTCAGTAACTTGTAG
>A02:25M26M:783001	TAATACGACTCACTATAGGGCCCCAAAGAGTAAGAAAAAGCTCTTTGATTCCAAATTCTTTTCCTGCGATCTCTCAGTAACTTGTAG
>A02:25M26M:782901	TAATACGACTCACTATAGGGAAAACAAAAGAGGAGAAAAAACCAACAAGGTATTGCAATACTAACCAGATCTCTCAGTAACTTGTAG
>A02:25M26M:782551	TAATACGACTCACTATAGGGCCAATTTTTATTCCCTCTTTTAAATCACACACATACCCAAAAAAGGAGATCTCTCAGTAACTTGTAG
>A02:25M26M:782451	TAATACGACTCACTATAGGGTACAATTGTATATTACCGTTGAGTTCCAAGTCGTGAGTAGTTTTTCTGATCTCTCAGTAACTTGTAG
>A02:25M26M:782251	TAATACGACTCACTATAGGGCATCGATTTTATATCGTCGAGATTGAGCGGTTCGTCAGGTCGTTTTCGATCTCTCAGTAACTTGTAG
>A02:25M26M:782151	TAATACGACTCACTATAGGGCGAACCAGATAAAACCATATAAACCCTAAAATCCGGTTTAATATTTCGATCTCTCAGTAACTTGTAG
>A02:25M26M:782001	TAATACGACTCACTATAGGGATACAAGATCGTTACCACTTGATCTCTTATCTCTTTATCAGATAGCAGATCTCTCAGTAACTTGTAG
>A02:25M26M:781851	TAATACGACTCACTATAGGGATTGTTTCTTGCCTAAAAAGCAACAAGAAAAACATCAGTATGTTTCAGATCTCTCAGTAACTTGTAG
>A02:25M26M:781751	TAATACGACTCACTATAGGGCTTGGATTCCGCATCGGTAATTTGTCCCCGGGAGATCGATTGGGACAGATCTCTCAGTAACTTGTAG
>A02:25M26M:781301	TAATACGACTCACTATAGGGCATTGTAAAAAACATTAAGGAACAGAGCAGATATTCAGATTCAATGTGATCTCTCAGTAACTTGTAG
>A02:25M26M:781201	TAATACGACTCACTATAGGGTCTTTTCTTGAATATCAACGGTCTCAAGCTCATCCCAACCACAAAGAGATCTCTCAGTAACTTGTAG
>A02:25M26M:781051	TAATACGACTCACTATAGGGCATGAACCGCCGCGATGTTGCATGTCCCAAGGATATCAAGCATCGATGATCTCTCAGTAACTTGTAG
>A02:25M26M:780851	TAATACGACTCACTATAGGGTTAGGCAAGAACCAAATGGCTCATGAGCAGAGTTTGCTAATAAAATAGATCTCTCAGTAACTTGTAG
>A02:25M26M:780501	TAATACGACTCACTATAGGGGGTTCTGTGTGGCATTGTTTATATAGGCACCTAAAGGGCACCACTATGATCTCTCAGTAACTTGTAG
>A02:25M26M:779651	TAATACGACTCACTATAGGGTGGGATGAAAGAAAGGTATAGGTATTATGTACCTTCAGTACGCATACGATCTCTCAGTAACTTGTAG
>A02:25M26M:779251	TAATACGACTCACTATAGGGAGTATTTTGCAACCAAAGACAAGTTCACTAGTCACGTCACTATATTAGATCTCTCAGTAACTTGTAG
>A02:25M26M:778701	TAATACGACTCACTATAGGGCTTCAAAACACATACGTTCAATTTAAAAGGGATGTGTCAAGTTGAGCGATCTCTCAGTAACTTGTAG
>A02:25M26M:778401	TAATACGACTCACTATAGGGAATGAATGTCGATGTGACAAAAACGATGTCTATCGTGTGAACTATGGGATCTCTCAGTAACTTGTAG
>A02:25M26M:778201	TAATACGACTCACTATAGGGAAACTCGATTTATTTTTATAGAGCCATTAACTAAAAGCTGCACTGTAGATCTCTCAGTAACTTGTAG
>A02:25M26M:778051	TAATACGACTCACTATAGGGCATTATTGCAAAATCTGGTGTTGATTGGTTGGTCTTTTTGGTTGTGTGATCTCTCAGTAACTTGTAG
>A02:25M26M:777701	TAATACGACTCACTATAGGGACCTTACGTTGATTAATTATCCCTATAATGTATGGATTTGTGTTTCTGATCTCTCAGTAACTTGTAG
>A02:25M26M:776601	TAATACGACTCACTATAGGGAGAAAACAAGCTAAACATCTTTTGATTCTTTTCAATTTGCGCAGTCTGATCTCTCAGTAACTTGTAG
>A02:25M26M:776501	TAATACGACTCACTATAGGGCTGTCAGAACTATCTATTTGCACTGTGTTAAAAACTTCACACTAATAGATCTCTCAGTAACTTGTAG
>A02:25M26M:775351	TAATACGACTCACTATAGGGTTGTCTGGAAGTACTCGTCGCCTTCCGGTGAGAATAAGAATTTTGATGATCTCTCAGTAACTTGTAG
>A02:25M26M:775251	TAATACGACTCACTATAGGGTTGATGATTGAGCGCACGTGTGGCTACTGGTATCCACGTACCCATGTGATCTCTCAGTAACTTGTAG
>A02:25M26M:775151	TAATACGACTCACTATAGGGTCACGGACTTTCTTCTAGTCTTTACTGGTCACTCTGGTTTAGTTAGTGATCTCTCAGTAACTTGTAG
>A02:25M26M:774901	TAATACGACTCACTATAGGGTTACAGTCGAATGTGGAAAAACATGCATTTGTACTTGTCTTTCTCAAGATCTCTCAGTAACTTGTAG
>A02:25M26M:774801	TAATACGACTCACTATAGGGTGGCATACATGTAAATACTTGGAAAAAGAGTAATCAGTAATGAAACTGATCTCTCAGTAACTTGTAG
>A02:25M26M:774651	TAATACGACTCACTATAGGGTTTGCAACTCCATTCTATTTCACTTTTTTCATCCTTCTGTACACTACGATCTCTCAGTAACTTGTAG
>A02:25M26M:774601	TAATACGACTCACTATAGGGACTAGTAGTGAGTAGCCCATCACCTATTCTGATTTGCAATATATCAGGATCTCTCAGTAACTTGTAG
>A02:25M26M:772251	TAATACGACTCACTATAGGGACTTTGATTTGACAAAGTCAAAATTGGACTAAATATCACAACGCTCGGATCTCTCAGTAACTTGTAG
>A02:25M26M:772151	TAATACGACTCACTATAGGGCGATGCGCAGGTGCACATGGTTTGAATGGTAAACACCAAAACATGTGGATCTCTCAGTAACTTGTAG
>A02:25M26M:771951	TAATACGACTCACTATAGGGATTCTCCCCCGAACTAATATTAAATAGTCCTCTCAAAATCTTTGACTGATCTCTCAGTAACTTGTAG
>A02:25M26M:771801	TAATACGACTCACTATAGGGGCAAAGTTGAAGAAGACTAAAGTGGCATAATATTTCGTTGTAAGCTAGATCTCTCAGTAACTTGTAG
>A02:25M26M:771551	TAATACGACTCACTATAGGGGGTGGTTTCGGCCATCCTTGTGGTGGCTGCGTTGCATCCATAACGAAGATCTCTCAGTAACTTGTAG
>A02:25M26M:771401	TAATACGACTCACTATAGGGATTTATACACCTTTGCTGTATAAGAAGCTGGCAACAATGAATCTGTAGATCTCTCAGTAACTTGTAG
>A02:25M26M:771301	TAATACGACTCACTATAGGGAAGCTCATAAGCACACTCGTTTTGGTTTTATGTAAAAGCGTCATTGTGATCTCTCAGTAACTTGTAG
>A02:25M26M:771051	TAATACGACTCACTATAGGGAGCAAAAGAAAACCGACACATGTTTGCTTGATTCCACCAATAAGGAAGATCTCTCAGTAACTTGTAG
>A02:25M26M:770851	TAATACGACTCACTATAGGGTAATTAGACATGGATTTGATGGATGCACAAGTTCAACCAAAGTCACAGATCTCTCAGTAACTTGTAG
>A02:25M26M:770751	TAATACGACTCACTATAGGGAGGGCTTTACGCATTACAATCGTAGATGAAGAAGCCATACATCTTATGATCTCTCAGTAACTTGTAG
>A02:25M26M:770651	TAATACGACTCACTATAGGGCTAAGAAGAATAACCAACACACTGCTAGAAAATATTCTTATAGCTGAGATCTCTCAGTAACTTGTAG
>A02:25M26M:770551	TAATACGACTCACTATAGGGCCCCATTACATTTTCTTTTGGTTGTTTCATGTCCAAGTGCTTGTCTTGATCTCTCAGTAACTTGTAG
>A02:25M26M:770351	TAATACGACTCACTATAGGGAATAATAATCTGAAATGATGAGTAAACTAGTTGCATTCCCCCACCCCGATCTCTCAGTAACTTGTAG
>A02:25M26M:754101	TAATACGACTCACTATAGGGCGTTCAGGAAAAACAAAATACTCAGGACTATTCAACCATTTCCACAAGATCTCTCAGTAACTTGTAG
>A02:25M26M:753901	TAATACGACTCACTATAGGGACGTTGCCCCCTCGTGGGCTTATTGATTCCAAATCAATTCTGTGTCCGATCTCTCAGTAACTTGTAG
>A02:25M26M:753801	TAATACGACTCACTATAGGGGGTTTTTTCCTTCGTCTCCATTATGTCTTCCTTGTGATTCTCTTTCAGATCTCTCAGTAACTTGTAG
>A02:25M26M:753401	TAATACGACTCACTATAGGGGGAAAAAAAGATTTTGATCCCAAAAAAGCAATGATTCAGTCAATGTAGATCTCTCAGTAACTTGTAG
>A02:25M26M:753101	TAATACGACTCACTATAGGGTCAACAAAGCCATTGTTCAATTAGCGGGCCTTTGATTAGCTGCAATTGATCTCTCAGTAACTTGTAG
>A02:25M26M:753001	TAATACGACTCACTATAGGGTGTCCGTGTCCGTGTGTGTGAAAGGAAAAAATCATCACACAGTAGACGATCTCTCAGTAACTTGTAG
>A02:25M26M:752701	TAATACGACTCACTATAGGGCACTACTTTGAGCAACTTGACTTAAGCCCATTACTCCGTACTTTTAAGATCTCTCAGTAACTTGTAG
>A02:25M26M:752151	TAATACGACTCACTATAGGGAGGGATAAATCTCCATGAATTTGCGTTAGTTTTCTGCTACACGCAATGATCTCTCAGTAACTTGTAG
>A02:25M26M:752051	TAATACGACTCACTATAGGGAAGCACCAATACCCTCCAACATATTATAACAACCATTTGTTCCATATGATCTCTCAGTAACTTGTAG
>A02:25M26M:751751	TAATACGACTCACTATAGGGCCAAATCCAATTTTGAAGTCAAATGAGAGAAAATATACAGAGATTTGGATCTCTCAGTAACTTGTAG
>A02:25M26M:751551	TAATACGACTCACTATAGGGTATATGTAAGTCACATCCCTCCTACGTGTAATAGTCTCTGTTCTTCAGATCTCTCAGTAACTTGTAG
>A02:25M26M:751351	TAATACGACTCACTATAGGGTTCTCCTCCTTTTTCTAGTTTGCTCGATAATCTTGTTTCTGTTTTGTGATCTCTCAGTAACTTGTAG
>A02:25M26M:751001	TAATACGACTCACTATAGGGCATGATTTTGGGTCTATGAGGCATGGTTTCTCTTTAAGTTAATGCTCGATCTCTCAGTAACTTGTAG
>A02:25M26M:750851	TAATACGACTCACTATAGGGAGAAACTGCAATATGAATCTGTTGATAATTGGGATTCTATGTGTTTGGATCTCTCAGTAACTTGTAG
>A02:25M26M:750801	TAATACGACTCACTATAGGGAGTTAAGCGATATCTCTGATCATCATTCTTGTCGCTGGCTAGACTTAGATCTCTCAGTAACTTGTAG
>A02:25M26M:750701	TAATACGACTCACTATAGGGCAATAACGCTAATGATTGGAGATCAACGCATGAGTTTGATCTACGAAGATCTCTCAGTAACTTGTAG
>A02:25M26M:750351	TAATACGACTCACTATAGGGCTCCATTATGATATATTCTCTTTGTTTTCATGTGTGTGCAGAGTGGAGATCTCTCAGTAACTTGTAG
>A02:25M26M:750101	TAATACGACTCACTATAGGGGAAAAGATAATGGTTTTCGACCAAAGATTCAAAAGTGTGCAGTCTGGGATCTCTCAGTAACTTGTAG
>A02:25M26M:749851	TAATACGACTCACTATAGGGACTGAAATGTTACTTACAACTCTAGCTTACCAGGTTTTCTTTTGATGGATCTCTCAGTAACTTGTAG
>A02:25M26M:749701	TAATACGACTCACTATAGGGCAACATTCATCAGTCTTCTGGCTTCTCAAATCAGGTCCCTATAACCGGATCTCTCAGTAACTTGTAG
>A02:25M26M:749501	TAATACGACTCACTATAGGGTGAATCAACAGCTTCTAAAAGAGAACACCCATCACTTACAACCTCCTGATCTCTCAGTAACTTGTAG
>A02:25M26M:749251	TAATACGACTCACTATAGGGATACGAGCAACTCATCAGTCAACTGATGAATGGTCAAGACACGCAGCGATCTCTCAGTAACTTGTAG
>A02:25M26M:749151	TAATACGACTCACTATAGGGGTATCGCCTTCCCAGCAGAACAACATTGTTAGCTTTCAAGAAATGGGGATCTCTCAGTAACTTGTAG
>A02:25M26M:749051	TAATACGACTCACTATAGGGATAGTAATAATGCTTCTTCATCCTTGGCGTCACAACAGCAGACATACGATCTCTCAGTAACTTGTAG
>A02:25M26M:748951	TAATACGACTCACTATAGGGTACTCAAGGCCAAGGTTTGGGACAATCTCAGCCAATGATGCTACAACGATCTCTCAGTAACTTGTAG
>A02:25M26M:748651	TAATACGACTCACTATAGGGCAAGTGGTGGGGACTGGCAGGAGGAGACCTATCAAAAGGTATCTGCAGATCTCTCAGTAACTTGTAG
>A02:25M26M:748551	TAATACGACTCACTATAGGGCTATTATTATCTGCAGATAAAGGCCCTCAAGGAAAAGTATTTGCCTGGATCTCTCAGTAACTTGTAG
>A02:25M26M:748401	TAATACGACTCACTATAGGGTTAATAAGAAAATGTGTTAATTTCCAGGTTGATTCTCTTCCTCAACAGATCTCTCAGTAACTTGTAG
>A02:25M26M:748301	TAATACGACTCACTATAGGGAACTAGTTGTTATGTTCTTAAATGTACATAGGGACAATATATCAGAGGATCTCTCAGTAACTTGTAG
>A02:25M26M:748051	TAATACGACTCACTATAGGGGCAACAACCACAAACCAACCAGCAGCAGCCTCAGATACAGAACTACTGATCTCTCAGTAACTTGTAG
>A02:25M26M:747851	TAATACGACTCACTATAGGGCAGCACCTCAGGAGCAGCCTATTGATCGTCTGATAGAAGCTGTGCACGATCTCTCAGTAACTTGTAG
>A02:25M26M:747651	TAATACGACTCACTATAGGGATTGATCAAACCTTCATTTTCAAAATAAGACCATTTCCTCCTAAATCGATCTCTCAGTAACTTGTAG
>A02:25M26M:747551	TAATACGACTCACTATAGGGTGTAGAGACAGTGGTAAACATATGTAATGAAGAGGTTTATCCAAGTGGATCTCTCAGTAACTTGTAG
>A02:25M26M:747351	TAATACGACTCACTATAGGGTTAATGTAGTCACAGATTCAGCCATTACGCTTACTAGTTCCTGTGAAGATCTCTCAGTAACTTGTAG
>A02:25M26M:747101	TAATACGACTCACTATAGGGGAGTTTTCAGAACCTATGTCTCTTAAAGAAATAGCTCAAGCTTGGGAGATCTCTCAGTAACTTGTAG
>A02:25M26M:747001	TAATACGACTCACTATAGGGCTTTTAGCTCTAACTATGGTCATTGGGATCCTGTCTAGGAGCTTCATGATCTCTCAGTAACTTGTAG
>A02:25M26M:746301	TAATACGACTCACTATAGGGAACACTGAAGGTGACTTTTTTCACTGGACCATAATTTGATTCAACGTGATCTCTCAGTAACTTGTAG
>A02:25M26M:746201	TAATACGACTCACTATAGGGTTGAAGCAAATATGATCTTGATACTAGCTATCACAATACAAAGTGAAGATCTCTCAGTAACTTGTAG
>A02:25M26M:745901	TAATACGACTCACTATAGGGTTAGTGACTCGGTTTAATTGTTTCTACAACTACCACCGCATTGGATAGATCTCTCAGTAACTTGTAG
>A02:25M26M:736201	TAATACGACTCACTATAGGGAAAGTCCTATACACTGACCATGTTTTAGTCATAAAAAGAGTCACAGTGATCTCTCAGTAACTTGTAG
>A02:25M26M:736101	TAATACGACTCACTATAGGGAGATTTTCGTCAGTGGCCTAAAAGTTTATTTTAATGTGTGGTCCTAGGATCTCTCAGTAACTTGTAG
>A02:25M26M:736001	TAATACGACTCACTATAGGGTGTCCGGGTGAAGAGTAACCTGCACTCGTGATTTAAAAATGAATTACGATCTCTCAGTAACTTGTAG
>A02:25M26M:735851	TAATACGACTCACTATAGGGTTGATTCTACTTTGTTGATGAGAATCATACGATAAACTTACCAACCTGATCTCTCAGTAACTTGTAG
>A02:25M26M:735551	TAATACGACTCACTATAGGGTTACATTACAAGATCTCAAACAAGAGAAAGTCATAAAAGCCAGAAAAGATCTCTCAGTAACTTGTAG
>A02:25M26M:735451	TAATACGACTCACTATAGGGTGTTTCTTCAAACACAAACCGACCTGCACACCACCGGACATATCTCTGATCTCTCAGTAACTTGTAG
>A02:25M26M:735351	TAATACGACTCACTATAGGGCCGGTTTTCCCCACCCGAAATCCGAACCATATAGCCCAAACCGGTTTGATCTCTCAGTAACTTGTAG
>A02:25M26M:735251	TAATACGACTCACTATAGGGCACGTACAACTCGCAAAGTTGCTCAATCCCTAATAAACGCAAACCTTGATCTCTCAGTAACTTGTAG
>A02:25M26M:735151	TAATACGACTCACTATAGGGAACGTCTTAGCTTTGTGTCCGAAGCAACCGATGGGGAACACACAGTTGATCTCTCAGTAACTTGTAG
>A02:25M26M:735051	TAATACGACTCACTATAGGGCATACATGAGACGAACCGGTCTTTCCCCTTGGCCTCCATGCGTCTTCGATCTCTCAGTAACTTGTAG
>A02:25M26M:734951	TAATACGACTCACTATAGGGCTCAGAATGAGAGCGAGTTGACTCGCTCTTAGCTCGCTCCCTAAGTTGATCTCTCAGTAACTTGTAG
>A02:25M26M:734851	TAATACGACTCACTATAGGGATCTCTCCAGCTTGAGGGATCTTGAGGGTTCTTTCACCTTGAAGAACGATCTCTCAGTAACTTGTAG
>A02:25M26M:734701	TAATACGACTCACTATAGGGCAGATATGAGCCCATGATTTATAAAAATTCACTACCGTTTTGCCATCGATCTCTCAGTAACTTGTAG
>A02:25M26M:734601	TAATACGACTCACTATAGGGAGGTAACTTGTAAAGAAAGGACACACGGCGAGTCACAAGAAGCCGGAGATCTCTCAGTAACTTGTAG
>A02:25M26M:734501	TAATACGACTCACTATAGGGAACACTGCTGAAATCTTCCTCGCTCTCAGACACTGTCAACGTGACAGGATCTCTCAGTAACTTGTAG
>A02:25M26M:734401	TAATACGACTCACTATAGGGACGTGACCCGCAAGGGGGAGGAAGTGACCGAGAACAAGAGAAAGAGAGATCTCTCAGTAACTTGTAG
>A02:25M26M:734301	TAATACGACTCACTATAGGGACTCGGTGAGTTTGTAGAAGACGACTTGCTGTACAGAATCTTTTAGCGATCTCTCAGTAACTTGTAG
>A02:25M26M:734201	TAATACGACTCACTATAGGGTGCATAGGGGCTGACATGGGAGATCTTGATGATATTTAGCACCATCTGATCTCTCAGTAACTTGTAG
>A02:25M26M:733501	TAATACGACTCACTATAGGGTTTCACTAGTCCTTTGGACGATTTTGAAAGTTGGAAGTATATACACAGATCTCTCAGTAACTTGTAG
>A02:25M26M:733401	TAATACGACTCACTATAGGGTGGTTTCTCTAAAATATTTTACAATAATGTTGTCACCAACTAGACACGATCTCTCAGTAACTTGTAG
>A02:25M26M:733201	TAATACGACTCACTATAGGGATACCATAGAAAGCATTAATGCAAATGAGTTTTGTTAGGTCTAACTAGATCTCTCAGTAACTTGTAG
>A02:25M26M:733151	TAATACGACTCACTATAGGGACGTATTAAATCATGTCAACGTCCACATACGTAGATTTATGCTTTTAGATCTCTCAGTAACTTGTAG
>A02:25M26M:729651	TAATACGACTCACTATAGGGCTTGTAAGGTATGAACCGGGTCAAAATCACGATATTTCTACGTGAATGATCTCTCAGTAACTTGTAG
>A02:25M26M:729501	TAATACGACTCACTATAGGGGGAGGTGGCATAACGCAGTTATCTCCGTTGAAGTAAATACGTCTTGGGATCTCTCAGTAACTTGTAG
>A02:25M26M:729401	TAATACGACTCACTATAGGGTTTCTGACTGTACATTTCCTAGTGGACCGGCTTGGCTCAACATATCGGATCTCTCAGTAACTTGTAG
>A02:25M26M:729301	TAATACGACTCACTATAGGGAAATACATGAAATTGATTACCTACAAAAACCCTCCATATCACAATCTGATCTCTCAGTAACTTGTAG
>A02:25M26M:729101	TAATACGACTCACTATAGGGGCTGGAATTTATTGATACGGTTTCACGCAAATAGTTATAACCAGGCTGATCTCTCAGTAACTTGTAG
>A02:25M26M:728651	TAATACGACTCACTATAGGGGCAGCTTGGGCTTACTTATGCCAGCGTAAGGACTAAGGGGTTTGTAGGATCTCTCAGTAACTTGTAG
>A02:25M26M:728551	TAATACGACTCACTATAGGGATTCCACAGCGAGTAATTCATATTGTAATTAAAGTTTGTGATTGCAAGATCTCTCAGTAACTTGTAG
>A02:25M26M:728401	TAATACGACTCACTATAGGGCCCTGAAGCTTGTATTACCGAAGCTATTTTCTGGCTGTTACAATAAAGATCTCTCAGTAACTTGTAG
>A02:25M26M:728301	TAATACGACTCACTATAGGGTTACTTGACACATGTACCAGTTTGAGAATTATTTTGACAACCACACGGATCTCTCAGTAACTTGTAG
>A02:25M26M:728201	TAATACGACTCACTATAGGGCAACAAGTGGGAGATTTCTTGGCTAGAAACTGCGAATATGTGCACGTGATCTCTCAGTAACTTGTAG
>A02:25M26M:728001	TAATACGACTCACTATAGGGACGGTTTTCGCGGGGCCACAAGTATAACCAGGTCCTGGTGCCTTCAAGATCTCTCAGTAACTTGTAG
>A02:25M26M:727901	TAATACGACTCACTATAGGGCACTAATCTGAAAAGCAGAAACAGCGGTTGCGGAGTCTTGTGCCCACGATCTCTCAGTAACTTGTAG
>A02:25M26M:727801	TAATACGACTCACTATAGGGTCCTGGTAACAAGTCAACGACAGTTGGAGTTTTCTTGCAGCAATGAGGATCTCTCAGTAACTTGTAG
>A02:25M26M:727701	TAATACGACTCACTATAGGGACCATATTCCATATCACTTCCTTCTTTAACCAAGTCCATCCCAATTGGATCTCTCAGTAACTTGTAG
>A02:25M26M:727451	TAATACGACTCACTATAGGGATAGCCATCAGGAGTCCAGCTCAGGATATCCCATTTTATGGTAATGTGATCTCTCAGTAACTTGTAG
>A02:25M26M:727251	TAATACGACTCACTATAGGGATATCATATCAAAGCTTATGCATTCAACAAGTTGATCACCACCACCAGATCTCTCAGTAACTTGTAG
>A02:25M26M:727001	TAATACGACTCACTATAGGGCAAGAAAGGAGAAATAGAAACAAAACTGAGAACTTAGAGAGGAGAATGATCTCTCAGTAACTTGTAG
>A02:25M26M:726451	TAATACGACTCACTATAGGGATCTGCAAAAGAAATAAATATTATCATGTGCGAAGGTTTGTTTTCTCGATCTCTCAGTAACTTGTAG
>A02:25M26M:726051	TAATACGACTCACTATAGGGCACGGAGAAAAGCATCACCGCCAATCGTTATTGCTGCCTCGTCAACAGATCTCTCAGTAACTTGTAG
>A02:25M26M:725901	TAATACGACTCACTATAGGGTCAAGTAATCATATGGGCTTCGGTTTTAAAATTGAACCAAGCCCAGGGATCTCTCAGTAACTTGTAG
>A02:25M26M:725751	TAATACGACTCACTATAGGGGTTTTTGTGGTACAGGTTCTGCGACCAGAGACTGAATTAGCGATTAGGATCTCTCAGTAACTTGTAG
>A02:25M26M:671851	TAATACGACTCACTATAGGGCGTGCATTATTCATACTTGTTTTGTTAAAAGATGTATCTGACATTAGGATCTCTCAGTAACTTGTAG
>A02:25M26M:667101	TAATACGACTCACTATAGGGTTCCATCCAAAAAGGAACGAGAAGGTAATAATTTCATGTTATTTGTTGATCTCTCAGTAACTTGTAG
>A02:25M26M:666851	TAATACGACTCACTATAGGGCACACAATCACCATAGCTTGGATCACTATTAATGAACCTACCGGTATGATCTCTCAGTAACTTGTAG
>A02:25M26M:666751	TAATACGACTCACTATAGGGATCACAAACGATGCATGGCTACTAAGATTATTTGGTTCAAAGCAAGAGATCTCTCAGTAACTTGTAG
>A02:25M26M:666651	TAATACGACTCACTATAGGGTATTAGATTGCATTTGTGCATCTGTGGCTGATTTAGATATCACACAAGATCTCTCAGTAACTTGTAG
>A02:25M26M:656501	TAATACGACTCACTATAGGGGCTTCAAAAGTTTGACCGAACCCCCAAGACTCCGACGCAACATCATAGATCTCTCAGTAACTTGTAG
>A02:25M26M:656351	TAATACGACTCACTATAGGGGAGATCCAGTTACTCTTATGCCCCTTAATAGCCAGGCTGTTAACATCGATCTCTCAGTAACTTGTAG
>A02:25M26M:656201	TAATACGACTCACTATAGGGTTCACAGGAACGATCCCACTTTTGTACTCGGCGATGGAAGTGAACATGATCTCTCAGTAACTTGTAG
>A02:25M26M:656101	TAATACGACTCACTATAGGGCCGGTGGGGTGTAGTTGGGTGGGCAGAAGTTGGTTGCTGTGATTCTGGATCTCTCAGTAACTTGTAG
>A02:25M26M:655901	TAATACGACTCACTATAGGGCCTTCTGTCACGCCAAAACATTAAAAATATTAGATACGATGATACTTGATCTCTCAGTAACTTGTAG
>A02:25M26M:655751	TAATACGACTCACTATAGGGATATAAAGATACTAACGCATGGTTTCTTTGCCGCTAATGTCGCCGTAGATCTCTCAGTAACTTGTAG
>A02:25M26M:655651	TAATACGACTCACTATAGGGCCAGTATCATAACAAAAGACATTGATCGATTCATGTTTAATTGTTTGGATCTCTCAGTAACTTGTAG
>A02:25M26M:655501	TAATACGACTCACTATAGGGGTAATTAGCATAGATTTTGGCAAGATTGCAGAATGTTAGAGTCCGGAGATCTCTCAGTAACTTGTAG
>A02:25M26M:654651	TAATACGACTCACTATAGGGGTGTTTCCTCACTCAGGTTTCGAACAGTCTAGTACTTGCAGTACTGTGATCTCTCAGTAACTTGTAG
>A02:25M26M:654551	TAATACGACTCACTATAGGGAGAGTAACTCCAGCTATAATCACAAGCATGTGGCAAGAGTTATGGGTGATCTCTCAGTAACTTGTAG
>A02:25M26M:654401	TAATACGACTCACTATAGGGTCACCAGAAGCATCAAGTCTCTCAGGAGGAGTTGATTTAACTCAAAAGATCTCTCAGTAACTTGTAG
>A02:25M26M:654251	TAATACGACTCACTATAGGGAGAGGTCTTAAGGTAGACTAGTAGTCAAAGCTCATGGAAGTTCAACTGATCTCTCAGTAACTTGTAG
>A02:25M26M:654101	TAATACGACTCACTATAGGGGTAAATCATTTATAGCAATTTCAAGGTTAGATGTTGAGGAAGTTTCAGATCTCTCAGTAACTTGTAG
>A02:25M26M:650901	TAATACGACTCACTATAGGGGTGCTTGCCAGAGTTATACGAAGACAAATCAAAATCTGATGAAGGGGGATCTCTCAGTAACTTGTAG
>A02:25M26M:650801	TAATACGACTCACTATAGGGATAGGAACATCATAAGCAACGGCAACAACGTCTTCACCACCAATCCAGATCTCTCAGTAACTTGTAG
>A02:25M26M:649201	TAATACGACTCACTATAGGGTTGTAAAGCGTCTTGATCGTTAATTTAAGGACTACTTTTGTCTATACGATCTCTCAGTAACTTGTAG
>A02:25M26M:648601	TAATACGACTCACTATAGGGTGAACAGGGTTTAATACTATTAAGCTAGCAAACAAATGTCACACAAGGATCTCTCAGTAACTTGTAG
>A02:25M26M:648451	TAATACGACTCACTATAGGGACACACACTCAAGAACAATGCAAGAAACAGAACTTCTTATTGAGTTGGATCTCTCAGTAACTTGTAG
>A02:25M26M:648351	TAATACGACTCACTATAGGGATGCTCAACTCAAAAGTTTCGTGGAGAATTAAAAAAAAGACACAGAAGATCTCTCAGTAACTTGTAG
>A02:25M26M:648251	TAATACGACTCACTATAGGGAACCTAATCTTGAACCATCTGCTTATGTTACAGTTTCTACAACAAAGGATCTCTCAGTAACTTGTAG
>A02:25M26M:648151	TAATACGACTCACTATAGGGAGAAGAAGAGGACTTGGATCTTTCATGATTCACTGGTTAAGGTTCCAGATCTCTCAGTAACTTGTAG
>A02:25M26M:648051	TAATACGACTCACTATAGGGTGCCTCTTCTTGTGTTCATTACTTCCCGTTGCGTCCCTTTCACTGCCGATCTCTCAGTAACTTGTAG
>A02:25M26M:647901	TAATACGACTCACTATAGGGTCTTCTTCAAAGCCCTCTTTTTCCTTAGGCACATACTTGATTTCCTCGATCTCTCAGTAACTTGTAG
>A02:25M26M:647801	TAATACGACTCACTATAGGGCATCTCCCTCCTCGCTAATGCTGCTCGCCTCTGGCGTATCTCCATAAGATCTCTCAGTAACTTGTAG
>A02:25M26M:647501	TAATACGACTCACTATAGGGAGCTACCACTCTTTCTCTTATCAATAGAGACTTCTTCACTGTCATCAGATCTCTCAGTAACTTGTAG
>A02:25M26M:647301	TAATACGACTCACTATAGGGCTAACAACACAATCATCAACGTACTGCAAAAACCTCACAAGATCTCTGATCTCTCAGTAACTTGTAG
>A02:25M26M:647151	TAATACGACTCACTATAGGGAACTTTATTCACATTATACCTGAATCGAATCCAATTGAAGAAGCAAGGATCTCTCAGTAACTTGTAG
>A02:25M26M:647051	TAATACGACTCACTATAGGGCGAAGACTTGAGAGACAAGAAGCTGGATTTGATCACTGCGAGCTCCTGATCTCTCAGTAACTTGTAG
>A02:25M26M:646901	TAATACGACTCACTATAGGGTTGGTCGTGGAAAGGTGCGAACTTGTTGAGAGATGACTCGAGAGCATGATCTCTCAGTAACTTGTAG
>A02:25M26M:646801	TAATACGACTCACTATAGGGACGTTGTTTTGGTTGCAGGAGCAGGTTTGGTTAGGAAAGTGTGTTTCGATCTCTCAGTAACTTGTAG
>A02:25M26M:646601	TAATACGACTCACTATAGGGGTGGCGTGAGGCCATGGAGTTGACGGCGGAGTTCGCTAGATTGAAAGGATCTCTCAGTAACTTGTAG
>A02:25M26M:646501	TAATACGACTCACTATAGGGACAGAGAAGATAGCTTGAAAACGTCGTGCAGTCGTTGTCATGTGTTAGATCTCTCAGTAACTTGTAG
>A02:25M26M:646301	TAATACGACTCACTATAGGGCATTGTTTTACTCAAATTGGCACTAAGAAGGTTAACAATTGACAAATGATCTCTCAGTAACTTGTAG
>A02:25M26M:646051	TAATACGACTCACTATAGGGACAAGTATATGAGTAGACAAAAGCATCACCACCTTCAACTTTCACAGGATCTCTCAGTAACTTGTAG
>A02:25M26M:645901	TAATACGACTCACTATAGGGATTAAACACATCCCATGTATAACCGCATTGTAAAGCGACACATCAGGGATCTCTCAGTAACTTGTAG
>A02:25M26M:645601	TAATACGACTCACTATAGGGGTTGTTCACCCGTCCCTCTCCTCTAGATAATGTATCCTACTCTTCCTGATCTCTCAGTAACTTGTAG
>A02:25M26M:645501	TAATACGACTCACTATAGGGCTCTTTCTTTCAATCCACATTCCAAAGCCATAGTTTCAACTCTGTCTGATCTCTCAGTAACTTGTAG
>A02:25M26M:645401	TAATACGACTCACTATAGGGCTCAATCTTTACACTAACGTAAACTAGGCGTCTTCGTTTTAGCTTCAGATCTCTCAGTAACTTGTAG
>A02:25M26M:645301	TAATACGACTCACTATAGGGTTAACGGAATGACATCCACAATACAGTTGATTCGATGTAGAAGTGGTGATCTCTCAGTAACTTGTAG
>A02:25M26M:645101	TAATACGACTCACTATAGGGCCCAATTCAGCATAAAGTTGAGAACTTTGGCGGAAAGGATTCACTAAGATCTCTCAGTAACTTGTAG
>A02:25M26M:645051	TAATACGACTCACTATAGGGTTAAGTGGAGCTTGTTCTGAGGCTGTGGAATGTGCAGGCAACGAGGGGATCTCTCAGTAACTTGTAG
>A02:25M26M:644901	TAATACGACTCACTATAGGGAAAGCAGAACAAAGAGAGAAAAGGGGAGATTTTGAACATTGGGTAGAGATCTCTCAGTAACTTGTAG
>A02:25M26M:644801	TAATACGACTCACTATAGGGCATCATCTCGCAGTTGTTTCTTTAGTTTTCATGATCGTTGTGATTGCGATCTCTCAGTAACTTGTAG
>A02:25M26M:644651	TAATACGACTCACTATAGGGTTCATTCACATGCCTCTCTCCATCTGCTATGGCCTCCATGGCACTGGGATCTCTCAGTAACTTGTAG
>A02:25M26M:644551	TAATACGACTCACTATAGGGCTAGTTACAGCTTTTTGATACTAGGACAGTGGTTGAACAAGGTATACGATCTCTCAGTAACTTGTAG
>A02:25M26M:644451	TAATACGACTCACTATAGGGGAACTATCTTTTTTTTTTTGTCTTTACAAAGAATTGGCTTGTGAGACGATCTCTCAGTAACTTGTAG
>A02:25M26M:644351	TAATACGACTCACTATAGGGACAATGTATGTATGAGTTTTATCACTTCAGTTCCTAACAAACTTTACGATCTCTCAGTAACTTGTAG
>A02:25M26M:644251	TAATACGACTCACTATAGGGAAGAAGGAACAAACAGTTGTAGTAGAATGCAAAGGCCACGATGCTGCGATCTCTCAGTAACTTGTAG
>A02:25M26M:644051	TAATACGACTCACTATAGGGTTTTAGTTGGGAGGAAGATGTGATTGGGTTAGTGGAAGAAAAGCATGGATCTCTCAGTAACTTGTAG
>A02:25M26M:643951	TAATACGACTCACTATAGGGGCAGCAGAGGACCATATCCGACAGTTTATGCCCAAACTAGCTGGACTGATCTCTCAGTAACTTGTAG
>A02:25M26M:631901	TAATACGACTCACTATAGGGACGCTCTTCTCGTCTTATTCTAATGAAGCTTTTTCAAATGTTTTTGCGATCTCTCAGTAACTTGTAG
>A02:25M26M:630601	TAATACGACTCACTATAGGGATTGGCCTATACTTATCTTGGTTTTATTCACAACCAACAAAAATCTCGATCTCTCAGTAACTTGTAG
>A02:25M26M:630051	TAATACGACTCACTATAGGGGGGCACTTCTTCTCAAGGTTCATTATAAATGACATGACTTCTTTGGAGATCTCTCAGTAACTTGTAG
>A02:25M26M:629951	TAATACGACTCACTATAGGGTCCCACTTAAACTAGGCCCGGTGGGACCTGCAGAACCAGAGGGAGTGGATCTCTCAGTAACTTGTAG
>A02:25M26M:643501	TAATACGACTCACTATAGGGACAAAACTTATCTTTGAAAGAGGCTCCACTACTGAAGCTAGCGTTTGGATCTCTCAGTAACTTGTAG
>A02:25M26M:643451	TAATACGACTCACTATAGGGCTGTGCCTTTTACCATTGTGTTTGTGATTCCTGCAATCACTGTCTCCGATCTCTCAGTAACTTGTAG
>A02:25M26M:642851	TAATACGACTCACTATAGGGATTTTGAGGTTAGTGGGCCAGCCTCATGAAATTAATGTTGGACCAAAGATCTCTCAGTAACTTGTAG
>A02:25M26M:642701	TAATACGACTCACTATAGGGTCATCCTCCGGCTACGCCCTGTTCGACGTGCATGGCCTCAATGAGATGATCTCTCAGTAACTTGTAG
>A02:25M26M:642601	TAATACGACTCACTATAGGGGTCAGGTCGTCAAGCTAACTGCTTTTCACCCTTGGCAGACTGCACAAGATCTCTCAGTAACTTGTAG
>A02:25M26M:642501	TAATACGACTCACTATAGGGTTATTGCTTGTAAATCAAGAAACCAGAAACTTACATCTCTTTCGTTTGATCTCTCAGTAACTTGTAG
>A02:25M26M:642401	TAATACGACTCACTATAGGGCCCTAAAGCGGAAGAAGGCAAAGAGACTAAGTTTAGCTTAGGAGTATGATCTCTCAGTAACTTGTAG
>A02:25M26M:641801	TAATACGACTCACTATAGGGGTTGTCGGAAGATAGCTACAGTAGAGCAAAGGTCAAGTACAATGTGAGATCTCTCAGTAACTTGTAG
>A02:25M26M:641601	TAATACGACTCACTATAGGGAGTTTTATTATAATGATCTTGATCAGAGAATGGTACTCACCGCACTTGATCTCTCAGTAACTTGTAG
>A02:25M26M:641851	TAATACGACTCACTATAGGGGACAATTACATGTATGCACAAGCTTCAAAGATTATAGAGGACAAGTCGATCTCTCAGTAACTTGTAG
>A02:25M26M:641251	TAATACGACTCACTATAGGGGGAGTTATAGACCTAACTGATTACAGAAAGAAGCTGTATGACTACCTGATCTCTCAGTAACTTGTAG
>A02:25M26M:641101	TAATACGACTCACTATAGGGAAGCACCCATCTTCAACTCTCCAGATTCTTGGAGCAGAGAGGGCACTGATCTCTCAGTAACTTGTAG
>A02:25M26M:640951	TAATACGACTCACTATAGGGAGAACAGGTGGAAAGACACCAAAGCACGGTCTGATAGTTCACTCTTCGATCTCTCAGTAACTTGTAG
>A02:25M26M:640851	TAATACGACTCACTATAGGGCTGCCAAGTGTTCTATTGCTGCCAGGGTTGACTATTTTGGTGGTAATGATCTCTCAGTAACTTGTAG
>A02:25M26M:640701	TAATACGACTCACTATAGGGAACTTCGTGTAGAAGTAGAGGAAAGGCTAGACTCTTTACATAATGTCGATCTCTCAGTAACTTGTAG
>A02:25M26M:640601	TAATACGACTCACTATAGGGCTTTGTGAACTAAATCTTGGCGGTTTGGTTTGTTTGATGTGTGTGTGGATCTCTCAGTAACTTGTAG
>A02:25M26M:639951	TAATACGACTCACTATAGGGAATACTATTATACCTTCCTACATAGATAAAGAAAGAGGATGATTCCTGATCTCTCAGTAACTTGTAG
>A02:25M26M:639851	TAATACGACTCACTATAGGGAGAAATGTTTATGTGACAATCTCCCTGACGAGCCAGTCAAGACAAGGGATCTCTCAGTAACTTGTAG
>A02:25M26M:638801	TAATACGACTCACTATAGGGCAATCATTGTTACCATCTGTTTGATCTCTCCCTGGAGAATTGCGTCTGATCTCTCAGTAACTTGTAG
>A02:25M26M:638701	TAATACGACTCACTATAGGGATCTAAGAGCTCCTTTGAAGACAAGACGGAAGGAGAGTTTGTTGCACGATCTCTCAGTAACTTGTAG
>A02:25M26M:638601	TAATACGACTCACTATAGGGAATAGCCCATTGAAGTCCCAAGATGCAGTTCTTGCACATCGTATGGCGATCTCTCAGTAACTTGTAG
>A02:25M26M:638501	TAATACGACTCACTATAGGGATGGGACACTCCAGACCTTCATCTTTGCTGCCTACAGACGACTCATCGATCTCTCAGTAACTTGTAG
>A02:25M26M:638401	TAATACGACTCACTATAGGGGTCCGGTGAGATAGCTGGAAGCTAGGTTCCACATTCTAGCATCAGGGGATCTCTCAGTAACTTGTAG
>A02:25M26M:638051	TAATACGACTCACTATAGGGATCAAAACCCACTAATCAGCTAAGCGTAGGAATCGAACAAGATCGTCGATCTCTCAGTAACTTGTAG
>A02:25M26M:637951	TAATACGACTCACTATAGGGTCAATAGACAATAGACATCGATAAAGATGAAGATCGTACCGATTCTCGATCTCTCAGTAACTTGTAG
>A02:25M26M:637851	TAATACGACTCACTATAGGGATTTGCAAGTGAGCTTTTTTTTGTTTCGAAACGTTGAAGAAGATGATGATCTCTCAGTAACTTGTAG
>A02:25M26M:637701	TAATACGACTCACTATAGGGCATTAGACCAAAAGGCAAAATGTCAAAGAACTTGGTAAGAAATCCATGATCTCTCAGTAACTTGTAG
>A02:25M26M:634701	TAATACGACTCACTATAGGGATGTCGACAGGAAAAGTAGGTGGCTGATCGTGAGCTGCTCCTGGAGTGATCTCTCAGTAACTTGTAG
>A02:25M26M:634601	TAATACGACTCACTATAGGGTTTGTTCCATCTCTCTAATATTTGTTTCGTTCTTCTTATTCTCCTTTGATCTCTCAGTAACTTGTAG
>A02:25M26M:634551	TAATACGACTCACTATAGGGATTCTTGGATGGTTTGGAATATGACATGACAACAAGGTTAGAATATAGATCTCTCAGTAACTTGTAG
>A02:25M26M:634351	TAATACGACTCACTATAGGGCATGACTCACTGACATAAACTACTAGTTAGAAACTCATTACATTAAAGATCTCTCAGTAACTTGTAG
>A02:25M26M:634201	TAATACGACTCACTATAGGGGCTACATGCAGCCACTGTCCAATACCCTCTCAACACATCTGCTTTCAGATCTCTCAGTAACTTGTAG
>A02:25M26M:634001	TAATACGACTCACTATAGGGCAACCTCGTTGTCTTCGCCGTTTCTTGGACTCACCAAGAACAACCTTGATCTCTCAGTAACTTGTAG
>A02:25M26M:633851	TAATACGACTCACTATAGGGTGAGGATGACTCCTATAGTATCTGAGGGTCCAACAGAGAGGATAAGAGATCTCTCAGTAACTTGTAG
>A02:25M26M:633651	TAATACGACTCACTATAGGGGTTGCAGCTTGCTCCCCAGCCACGAGCCTCGCTCTGAACTCTTTCCAGATCTCTCAGTAACTTGTAG
>A02:25M26M:633501	TAATACGACTCACTATAGGGTCTCATCAGCCTTGAAATCTTTTAACTTCTAAGGCAAGAAAGTTCACGATCTCTCAGTAACTTGTAG
>A02:25M26M:633401	TAATACGACTCACTATAGGGGAGGAACTTGCCGGAGCTTCTCTTGAGGCAAGAATAGATTCTGGCTTGATCTCTCAGTAACTTGTAG
>A02:25M26M:633301	TAATACGACTCACTATAGGGCAAGCATCCATGTTACCCTCTTTCTTTTTTCTGACTCAATTCACTTTGATCTCTCAGTAACTTGTAG
>A02:25M26M:633201	TAATACGACTCACTATAGGGGCTAAATTCGTTTGGTTGTAAGTGTCCTAGTCAGAGGGATGGACAATGATCTCTCAGTAACTTGTAG
>A02:25M26M:633001	TAATACGACTCACTATAGGGCCCCTATTGGACATGTGCACACGCCTTTGAATATTAGATAAGAGACAGATCTCTCAGTAACTTGTAG
>A02:25M26M:632901	TAATACGACTCACTATAGGGTGTAGTTACTTAGCCCACTTGTGTGTCGGAAACAAAAAAGACATACAGATCTCTCAGTAACTTGTAG
>A02:25M26M:632751	TAATACGACTCACTATAGGGAAAGTCCATTTGCAACCACATAAAACTATAGCGGATAAATTTGACAAGATCTCTCAGTAACTTGTAG
>A02:25M26M:632601	TAATACGACTCACTATAGGGGAGTTCTGTAATAAAATAAACCCACGAGTTTGTACTATTTTGACTATGATCTCTCAGTAACTTGTAG
>A02:25M26M:632501	TAATACGACTCACTATAGGGAAATACGTCATGGCACTGACGTCCATTTTACGTGACAAAAATGACCAGATCTCTCAGTAACTTGTAG
>A02:25M26M:632351	TAATACGACTCACTATAGGGGGTGACGTTTGTTTACATGACATCATTACAAAACTGAGCATCAGTTGGATCTCTCAGTAACTTGTAG
>A02:25M26M:632201	TAATACGACTCACTATAGGGTCATCAGCCTTATACAAGTCAAGTTCTACGGATCGCCTAACCATAAGGATCTCTCAGTAACTTGTAG
>A02:25M26M:632051	TAATACGACTCACTATAGGGTACAGGAACTTCCTGATTGATTAGAGGAACCTGTTTTGGGGACTAAGGATCTCTCAGTAACTTGTAG
>A02:25M26M:632001	TAATACGACTCACTATAGGGCTGGAGGTAGTATTCCAAGATCAAGTCCATCTCAAGATTAATTAATTGATCTCTCAGTAACTTGTAG
>A02:25M26M:627901	TAATACGACTCACTATAGGGTCTTTGGTTCTGTTATGGACATGGTGATGATTAAGGTAGGTAGGTATGATCTCTCAGTAACTTGTAG
>A02:25M26M:627301	TAATACGACTCACTATAGGGCTGGATAAGGATGCGTTGATGGATATGCTTACATTTTTGACTGTGGAGATCTCTCAGTAACTTGTAG
>A02:25M26M:627151	TAATACGACTCACTATAGGGATCAGCCCGGTCTTGGTGGGGCATTTGTATGGAGATTGGATCATGCCGATCTCTCAGTAACTTGTAG
>A02:25M26M:623051	TAATACGACTCACTATAGGGCAAGAACGACTCTGCTTCAACAGCCTAAAGATAAGGAAACAGCAAAGGATCTCTCAGTAACTTGTAG
>A02:25M26M:622951	TAATACGACTCACTATAGGGCGCCACATTATTCCGTCGGAAACCATTCTCGTGGGTATACCACGCCAGATCTCTCAGTAACTTGTAG
>A02:25M26M:620151	TAATACGACTCACTATAGGGCATAATTTCAATTGTGGTCATCCTGCAAGTAAAACTCTTCTTTTAATGATCTCTCAGTAACTTGTAG
>A02:25M26M:619751	TAATACGACTCACTATAGGGCACACGAGCACACAATATCATTGATTGGTCTTTTTTAGACAAAAATAGATCTCTCAGTAACTTGTAG
>A02:25M26M:619651	TAATACGACTCACTATAGGGAGTTTCAAAAGAGTTGAAACGCAAAAAGCGTCGTCGTCGCGATAGAGGATCTCTCAGTAACTTGTAG
>A02:25M26M:619501	TAATACGACTCACTATAGGGCACCTTTCTCTTCTTCAGGTTCTAAGCCGTTCAATTTTGGCGCGATTGATCTCTCAGTAACTTGTAG
>A02:25M26M:619401	TAATACGACTCACTATAGGGACTCTGATTAGGAATGGCGTCGAGGAGAAACGTACGGTACGCTCAGCGATCTCTCAGTAACTTGTAG
>A02:25M26M:619301	TAATACGACTCACTATAGGGTTCGATCCTCGATTCGATTATACGCCGAAAGCATTTGATAGAGTACCGATCTCTCAGTAACTTGTAG
>A02:25M26M:619201	TAATACGACTCACTATAGGGTCCTTTTGACGGTTTTCATATTCACTGGTCACATGGAAGGAGATAGCGATCTCTCAGTAACTTGTAG
>A02:25M26M:619051	TAATACGACTCACTATAGGGCAATGGAGTCTGTTGTTTGATGTGGAGTTTTAGTGAGTTGGATCAACGATCTCTCAGTAACTTGTAG
>A02:25M26M:618651	TAATACGACTCACTATAGGGGCCATTTATGCTTCTGAGATCCTCTTATGTTTCCTGGAAAGAGCAGTGATCTCTCAGTAACTTGTAG
>A02:25M26M:618851	TAATACGACTCACTATAGGGATGTGGATATTGAGTGAGTTGGATCAAGTAGACAACAGCTTATTTTCGATCTCTCAGTAACTTGTAG
>A02:25M26M:618401	TAATACGACTCACTATAGGGTACATGTTGCTTGATTTGATAACCCTTGTGGATTCCGTTTGTTTGATGATCTCTCAGTAACTTGTAG
>A02:25M26M:618501	TAATACGACTCACTATAGGGGACACAGCTTGTGTTCTTTTGTCTGTTTGAAATTACGTTTTCTTTTAGATCTCTCAGTAACTTGTAG
>A02:25M26M:618301	TAATACGACTCACTATAGGGCTCTGCTGAAATGATTCTTCTCTTTTGTTTGTTCTCTATGTCCGTTTGATCTCTCAGTAACTTGTAG
>A02:25M26M:618201	TAATACGACTCACTATAGGGCTATGAGACTCGGATTGCTTACTACTCGTGGAGAGGAGCTGAAGGGTGATCTCTCAGTAACTTGTAG
>A02:25M26M:618051	TAATACGACTCACTATAGGGGAGTCTTAGTGGAGATATGTAATAGTATACAAATAATAGACTTGATGGATCTCTCAGTAACTTGTAG
>A02:25M26M:617901	TAATACGACTCACTATAGGGTCGTTTTTGTCAATATTTTGTATGCGTCTTTGGGTTTTGTCGGCAAAGATCTCTCAGTAACTTGTAG
>A02:25M26M:617201	TAATACGACTCACTATAGGGACTGACTCAGCTCTGAGTCACACACACACGAGTTGGAATCTGAGTTTGATCTCTCAGTAACTTGTAG
>A02:25M26M:616851	TAATACGACTCACTATAGGGAGATTTGGTGGCAATGGAGTTGAATCCATTCTAGCAAACTACAAGCTGATCTCTCAGTAACTTGTAG
>A02:25M26M:616701	TAATACGACTCACTATAGGGAAGAACATGGACATGGAAGAGAAAGGTAATAATAATAACACATGCTTGATCTCTCAGTAACTTGTAG
>A02:25M26M:616401	TAATACGACTCACTATAGGGTTCTGAGATTGTTTATGCATCATCATATCATTCGGCAGTATGAAGTCGATCTCTCAGTAACTTGTAG
>A02:25M26M:616301	TAATACGACTCACTATAGGGGCTCTTTGATTACATTGTAGAGAAAGGCAGGTTACAAGAGGAGGAGGGATCTCTCAGTAACTTGTAG
>A02:25M26M:616151	TAATACGACTCACTATAGGGGAGTATTGCCATCGCAATATGGTTGTCCATAGAGACCTCAAGCCTGAGATCTCTCAGTAACTTGTAG
>A02:25M26M:616051	TAATACGACTCACTATAGGGGTAATGTCATGAGAGATGGTCATTTTCTGAAAACGAGCTGTGGAAGCGATCTCTCAGTAACTTGTAG
>A02:25M26M:610301	TAATACGACTCACTATAGGGGGTGTTATTTTTCTCTCTAGGGTGGTATTTACACGTTGGTTCCAGACGATCTCTCAGTAACTTGTAG
>A02:25M26M:615551	TAATACGACTCACTATAGGGTTCCTCGTTACCTTGCTGTTGCTCCACCAGACACTGTAGAGCAGGCCGATCTCTCAGTAACTTGTAG
>A02:25M26M:610151	TAATACGACTCACTATAGGGGTGATAGTAAACAAACTTCTCTTATATTATGGCAGATCAACGAGGAGGATCTCTCAGTAACTTGTAG
>A02:25M26M:610051	TAATACGACTCACTATAGGGTCTCTTCGCAACAGAGTACAAAATGAGGTATGTAGTAGTTTCTGTCTGATCTCTCAGTAACTTGTAG
>A02:25M26M:609951	TAATACGACTCACTATAGGGTCGTTTCAGGCTACTGTTACATACTACTTGTTACTGGACAACCGGTTGATCTCTCAGTAACTTGTAG
>A02:25M26M:615101	TAATACGACTCACTATAGGGGTTCCACCTTTATGTTTTGTACTGACATTTTCACCTTTTCTTACTCAGATCTCTCAGTAACTTGTAG
>A02:25M26M:615001	TAATACGACTCACTATAGGGGTAGGCCACTGGGTTCCTTCACCTATGGATCAGTACGGATTGGGAGGGATCTCTCAGTAACTTGTAG
>A02:25M26M:614651	TAATACGACTCACTATAGGGGGTTCCTTGTTTTGCTGATGGTCTGAATACTAGGGACAACAATCAGCGATCTCTCAGTAACTTGTAG
>A02:25M26M:605251	TAATACGACTCACTATAGGGGCCATGATCTTACCCACTGTCATCAAATTTGAACGTCAGGTAACTACGATCTCTCAGTAACTTGTAG
>A02:25M26M:614451	TAATACGACTCACTATAGGGGTTCGGTTTCATTATTACAGTTTAGGTTTCTTGGTAATATTTTCAGTGATCTCTCAGTAACTTGTAG
>A02:25M26M:614301	TAATACGACTCACTATAGGGACTTTGGATTTTGAAACAGCTATACAAAGCTCGGGAAGAGAAGTACTGATCTCTCAGTAACTTGTAG
>A02:25M26M:614201	TAATACGACTCACTATAGGGGCAGCCTTTCTTACCAAGCTCCGTGTGATCTGAGAGCTTTTAACCATGATCTCTCAGTAACTTGTAG
>A02:25M26M:604901	TAATACGACTCACTATAGGGATTTGTTTCCACGGTTTGTAATAGTAGAGAAGATAGTGTAAGATGTGGATCTCTCAGTAACTTGTAG
>A02:25M26M:614001	TAATACGACTCACTATAGGGGGTTTCTAAGGTTTGATCATGTGTACATAAAACTTAGATGTTCACAAGATCTCTCAGTAACTTGTAG
>A02:25M26M:611851	TAATACGACTCACTATAGGGTATTTTGCATTGCAGTTATGGCGCTACATAAATAACTTCACCATCCTGATCTCTCAGTAACTTGTAG
>A02:25M26M:611751	TAATACGACTCACTATAGGGAAGTGGAGAGAAGGTCACAAGCCACCATGAAGTTTACAACACTAGCAGATCTCTCAGTAACTTGTAG
>A02:25M26M:611651	TAATACGACTCACTATAGGGATTTCAATCTTTATCTACTAAACCACCTTGCACCACTATTGATATCAGATCTCTCAGTAACTTGTAG
>A02:25M26M:611551	TAATACGACTCACTATAGGGCAGAATCTGAAAGTACAACAACCATGTTATTGTGGTTTCATAAATAAGATCTCTCAGTAACTTGTAG
>A02:25M26M:603351	TAATACGACTCACTATAGGGCTTCCCCTCAAGGTCATGCGGCTCTAGCGTCTTGTGGTATTCCTTATGATCTCTCAGTAACTTGTAG
>A02:25M26M:602551	TAATACGACTCACTATAGGGCATATGTAAAGAGTGCTTGAAGCATTTCAGAGAGACACTATGAGCTCGATCTCTCAGTAACTTGTAG
>A02:25M26M:611051	TAATACGACTCACTATAGGGCTCGTGTCATCATCTCTAGTTAAACACAACTCAGAATCTCAAAGTGTGATCTCTCAGTAACTTGTAG
>A02:25M26M:603001	TAATACGACTCACTATAGGGAGAGACAAAGTCACAAGACATGAAGTGTACATAACTAATAGTACTCAGATCTCTCAGTAACTTGTAG
>A02:25M26M:597401	TAATACGACTCACTATAGGGATCATCTCCGCCTCAGATCGAATCAAGAGTGGTCGTAGAATCTACTAGATCTCTCAGTAACTTGTAG
>A02:25M26M:592701	TAATACGACTCACTATAGGGTATATCGTCTGTGATACCTTTTCGCTTTGAATTCATTCACGAATTATGATCTCTCAGTAACTTGTAG
>A02:25M26M:610401	TAATACGACTCACTATAGGGAAGAAGAAGATAGTCAATGCCATCGGATTTCTTCACTCTTGCTGCCTGATCTCTCAGTAACTTGTAG
>A02:25M26M:592351	TAATACGACTCACTATAGGGACAAGTATTCTACGCAAAATATGGTGTTTTCACTCCCATTCTCAGACGATCTCTCAGTAACTTGTAG
>A02:25M26M:592201	TAATACGACTCACTATAGGGACAGCTACCAGGACCAAAGCACCTGAGGTTTTTCCATCAAAAAAACAGATCTCTCAGTAACTTGTAG
>A02:25M26M:592051	TAATACGACTCACTATAGGGTGCCAACCATCATTTCTGATACACCCATCCATGTAAGTGTACGCAAGGATCTCTCAGTAACTTGTAG
>A02:25M26M:591501	TAATACGACTCACTATAGGGGACTCTAATCGCCACAGCTTGTCCTGATCCCTATGCATATATAAGAAGATCTCTCAGTAACTTGTAG
>A02:25M26M:591151	TAATACGACTCACTATAGGGCCTCAGAAGCAGAGTTCTCAAAAGTAACATTCTCTGCAATAAAGTCTGATCTCTCAGTAACTTGTAG
>A02:25M26M:591051	TAATACGACTCACTATAGGGCGACGCCTGACAAACAAACCAATCAGAGTGATACACGTGCTTTTGCCGATCTCTCAGTAACTTGTAG
>A02:25M26M:590951	TAATACGACTCACTATAGGGGAAGCGGTGTTGTTCCAAGTGATGACGGTGATCTCCGGGGAGATTCCGATCTCTCAGTAACTTGTAG
>A02:25M26M:590851	TAATACGACTCACTATAGGGTCCCCGGTGAGAGACGGATCACGGTACGACACGTGTTTCCGAGAGGCGATCTCTCAGTAACTTGTAG
>A02:25M26M:590751	TAATACGACTCACTATAGGGAACCCTCACCATTCTAATCGTCTCCATAACTGAAACTCTTCTTCTCTGATCTCTCAGTAACTTGTAG
>A02:25M26M:590651	TAATACGACTCACTATAGGGCGGAGCCATGGTGGTGATTTACGATTGGTGAGAAAGGAGACAGCTTTGATCTCTCAGTAACTTGTAG
>A02:25M26M:590451	TAATACGACTCACTATAGGGCTTTAACCCGGTCCGACGTACTCTACAAAATCAACGTCAGTATGTATGATCTCTCAGTAACTTGTAG
>A02:25M26M:589951	TAATACGACTCACTATAGGGTCCCGCCGTCGGACGAGACTTGTTACCCTCTCTCCTCTCGCTCCGGCGATCTCTCAGTAACTTGTAG
>A02:25M26M:589851	TAATACGACTCACTATAGGGTTATGGCGACCAGGCTCTGAACACCGAGTACAGTAGCTACGCCCGACGATCTCTCAGTAACTTGTAG
>A02:25M26M:589751	TAATACGACTCACTATAGGGGGAAGGAAACCTGATTCCGGATATGGCGGAAGAACGGATGTTGAGTAGATCTCTCAGTAACTTGTAG
>A02:25M26M:589351	TAATACGACTCACTATAGGGAGGATAAGAAAAAGGATGGTAATGTCTCTGACGATGATGAGAAGAAGGATCTCTCAGTAACTTGTAG
>A02:25M26M:588951	TAATACGACTCACTATAGGGTGATGATGATGATGAAAAGAAGAAGAAGAAGAAGGACCATCATGATGGATCTCTCAGTAACTTGTAG
>A02:25M26M:588801	TAATACGACTCACTATAGGGGAAGAAAGACGATCATGATGAGAAAAAGAAGAAGGAGAAGGACCATCGATCTCTCAGTAACTTGTAG
>A02:25M26M:588751	TAATACGACTCACTATAGGGATAGTGACGATGAGAAGAAGAACAAGAAGAAGGATAAACACCACAAGGATCTCTCAGTAACTTGTAG
>A02:25M26M:588601	TAATACGACTCACTATAGGGGTTGTTTTGTTTTGTTTTCTGGTTCCCATTTGTGCTATCTTCTACGAGATCTCTCAGTAACTTGTAG
>A02:25M26M:588251	TAATACGACTCACTATAGGGGGATAACACCAAAATCCGATAAAAGAGTAACAACTTGTTTGATTAGAGATCTCTCAGTAACTTGTAG
>A02:25M26M:588151	TAATACGACTCACTATAGGGACAAACAACGTAACCACCAACGAGAATAAACTTAGACCCGCCATTCTGATCTCTCAGTAACTTGTAG
>A02:25M26M:588001	TAATACGACTCACTATAGGGACCGTGAATCCAATATCAACAATCGATCGTTGCCTATATAATTCAAAGATCTCTCAGTAACTTGTAG
>A02:25M26M:587851	TAATACGACTCACTATAGGGTACTTGACGTTTAAGATTAGTGTGTACTACTTTCTTAGGCTTTTTACGATCTCTCAGTAACTTGTAG
>A02:25M26M:587751	TAATACGACTCACTATAGGGCAAATGAAATCATGATTATACCAAACAAGAGATATTAGTCTGGTACAGATCTCTCAGTAACTTGTAG
>A02:25M26M:587401	TAATACGACTCACTATAGGGCATTCGAAATCAACGGCGAATTTGGCCGGAGGTTTAAAAACAGGAGCGATCTCTCAGTAACTTGTAG
>A02:25M26M:587301	TAATACGACTCACTATAGGGCAGACTCCACATTTTCTGCTTGGTGTTGAGTGTGCCCTTTAGGTGACGATCTCTCAGTAACTTGTAG
>A02:25M26M:587051	TAATACGACTCACTATAGGGCGTTGGGATTGACGACGGAATAAGTACCCACAGTCAGATAATTCATTGATCTCTCAGTAACTTGTAG
>A02:25M26M:586801	TAATACGACTCACTATAGGGGTTAAGAGATGTAACGAGGAACTGATGAGTTTAAGTATGGTTTGGGAGATCTCTCAGTAACTTGTAG
>A02:25M26M:586651	TAATACGACTCACTATAGGGTATTTTTGAGATGACTAGAGATTACCAAAAGAGGGGGAAAAGATTAAGATCTCTCAGTAACTTGTAG
>A02:25M26M:586551	TAATACGACTCACTATAGGGAAAGATTTGTTTTTGGTGGATTTCTTCCCGGAAAAATCCAACATTTTGATCTCTCAGTAACTTGTAG
>A02:25M26M:586451	TAATACGACTCACTATAGGGAGAATATGAAGTACAAATGATCCAAGAATGGAGAGAAGCCTACATGGGATCTCTCAGTAACTTGTAG
>A02:25M26M:586251	TAATACGACTCACTATAGGGCAAGAAGAGTCTCTCTCTACCGTGCATTCAGCGGCCTAACAAACCGAGATCTCTCAGTAACTTGTAG
>A02:25M26M:586101	TAATACGACTCACTATAGGGTCAACGAGGACGAGACGGGTAGCTACAACACGACGTTTCTATGCTCCGATCTCTCAGTAACTTGTAG
>A02:25M26M:586001	TAATACGACTCACTATAGGGGTTCAACAAGGTTTTGAGATTTTATAGGCAGAAAGTGGAGAGCGTGAGATCTCTCAGTAACTTGTAG
>A02:25M26M:585901	TAATACGACTCACTATAGGGGTTAAGGTTGAGAATCCAAACGTTGACTTCCCTGACATTAATAGTCTGATCTCTCAGTAACTTGTAG
>A02:25M26M:585451	TAATACGACTCACTATAGGGGGGTTTCTAGATATTCCAGAACTAAACTTTACCCATTTAAGTGATGTGATCTCTCAGTAACTTGTAG
>A02:25M26M:585351	TAATACGACTCACTATAGGGAATGTATTATATTTGTAGCCATTTCACCATTGGAAGTGATCAAGGAAGATCTCTCAGTAACTTGTAG
>A02:25M26M:585251	TAATACGACTCACTATAGGGGGATCATATAAAGCTCAAGATCGAACCCGAAACTCCGTTGTCAATGCGATCTCTCAGTAACTTGTAG
>A02:25M26M:585151	TAATACGACTCACTATAGGGCTTAAGAGAGCCGAGGAGCTTATGGACCGCGCTTTTGTTGAGTTCTAGATCTCTCAGTAACTTGTAG
>A02:25M26M:585001	TAATACGACTCACTATAGGGCTCATAATTTCTCTCACTATGTTTGCAGCTTCTTGAACCAGTTGGCGGATCTCTCAGTAACTTGTAG
>A02:25M26M:584851	TAATACGACTCACTATAGGGACTACTTCGAGGAACGCATCTAAGCCTTATCTACATACGGTTGATCAGATCTCTCAGTAACTTGTAG
>A02:25M26M:584701	TAATACGACTCACTATAGGGCATGTCTAGAGTGGAAGCTACATTTATTAAGCATTTCGCCAATGGAAGATCTCTCAGTAACTTGTAG
>A02:25M26M:584601	TAATACGACTCACTATAGGGAGAATCACATACTTCCTTGGTGCTTAAACCCAATTTTTCTAACCTATGATCTCTCAGTAACTTGTAG
>A02:25M26M:584501	TAATACGACTCACTATAGGGTACAGGCTTCTTGTCTGGTTGCGCCGTTGCTCTAGCCATTGCGATATGATCTCTCAGTAACTTGTAG
>A02:25M26M:584401	TAATACGACTCACTATAGGGATGGAGAACATCTTCCCTCTTTACAGGTTCTTGATAACGTTACATTCGATCTCTCAGTAACTTGTAG
>A02:25M26M:584301	TAATACGACTCACTATAGGGGCATGTTCGGGTTTGTTGCGGTTCATTTGTTTATGTATGCAGGAGACGATCTCTCAGTAACTTGTAG
>A02:25M26M:584201	TAATACGACTCACTATAGGGGCAAGGGACCGATCTTGGTTACAGAGAAGTTCTTCTGCTAGCCTCTGGATCTCTCAGTAACTTGTAG
>A02:25M26M:584051	TAATACGACTCACTATAGGGTCTTCTCATTGTAAGTTATCTAGGTTATTGATATCGATCTCTAACAAGATCTCTCAGTAACTTGTAG
>A02:25M26M:583951	TAATACGACTCACTATAGGGTTCATGATTACGCTGTTCTGTCCATTGAATATAATATATCGGTCAAGGATCTCTCAGTAACTTGTAG
>A02:25M26M:583801	TAATACGACTCACTATAGGGAAGTAATCTCTAGAGTTTGTGTTTTTCTATTGCTAGGTTATTCTCCCGATCTCTCAGTAACTTGTAG
>A02:25M26M:583601	TAATACGACTCACTATAGGGTATTATGGATGGGGAGGAGATTTCAAGAAACGAACACACACATGCTAGATCTCTCAGTAACTTGTAG
>A02:25M26M:583151	TAATACGACTCACTATAGGGCTAAAGTATCTCTCGACCATATTAGCGGTGGCGGCTAGAACAATATTGATCTCTCAGTAACTTGTAG
>A02:25M26M:582751	TAATACGACTCACTATAGGGTTACCATCTTAGAGATTGTTCGTCGTGGCATTTGGAACTTCTTCAGGGATCTCTCAGTAACTTGTAG
>A02:25M26M:582651	TAATACGACTCACTATAGGGAAAATGAAAATTTTGTGTTCTGACTTTGTGTGTATGCAATCAGGTTGGATCTCTCAGTAACTTGTAG
>A02:25M26M:582551	TAATACGACTCACTATAGGGTTTGCCTTTTCAAGAAGTTGGAGGAAGCAAGAGCATGTAAATTTATAGATCTCTCAGTAACTTGTAG
>A02:25M26M:582351	TAATACGACTCACTATAGGGATTCTATTCGGGCTCTCTTTGTCTCTGCTGCCAGTAATCTTCTGAAAGATCTCTCAGTAACTTGTAG
>A02:25M26M:576751	TAATACGACTCACTATAGGGAATAGTAATTAATACAAGAATCTTGGATCTATACACCCACCACTAACGATCTCTCAGTAACTTGTAG
>A02:25M26M:576651	TAATACGACTCACTATAGGGCCAAAAGACCATGTTTGTCTCCATCATTAACTTATAATTACAAATCAGATCTCTCAGTAACTTGTAG
>A02:25M26M:576551	TAATACGACTCACTATAGGGATCAGAGAAACATAAACATGGTGAGACAAAGAAGGAAGTCAGAGAAAGATCTCTCAGTAACTTGTAG
>A02:25M26M:576451	TAATACGACTCACTATAGGGGCCAAAGCAAAGAAGCGTGAGCAGAAGAAACATGCAATCTCTGGTGAGATCTCTCAGTAACTTGTAG
>A02:25M26M:576351	TAATACGACTCACTATAGGGTCTCCGGGCACATCTATCGGCGCTGGTCTTTTTGTCCTCTTCTTTGGGATCTCTCAGTAACTTGTAG
>A02:25M26M:576151	TAATACGACTCACTATAGGGCTCTTTTCCATTAATGTGATCCAATCCATATTGTTTCTACGGATTTGGATCTCTCAGTAACTTGTAG
>A02:25M26M:576001	TAATACGACTCACTATAGGGGATGATGCAATGAATTCGAAACTTGATGATCCATACACACATTTAGAGATCTCTCAGTAACTTGTAG
>A02:25M26M:575951	TAATACGACTCACTATAGGGAAAGGCCTATGTATATACGAAGCAGACCCGTGCTTAGGAATTTTAAAGATCTCTCAGTAACTTGTAG
>A02:25M26M:575701	TAATACGACTCACTATAGGGTGGTTTCTTTTCCCATTAATAGGCACGGCTCTAAATGATACTCTTCAGATCTCTCAGTAACTTGTAG
>A02:25M26M:574401	TAATACGACTCACTATAGGGACACCACGCGTAAAATAAAAACACTACAAGTAAAATAAAAACACTACGATCTCTCAGTAACTTGTAG
>A02:25M26M:574251	TAATACGACTCACTATAGGGTATTGTTTTCATTTGAAACCACGTTGCTTTAGACTTTCACCACACCCGATCTCTCAGTAACTTGTAG
>A02:25M26M:574151	TAATACGACTCACTATAGGGTAGTCTCATTTCTCTCATGGCATAAGGACTTTGGACACATCACTTTCGATCTCTCAGTAACTTGTAG
>A02:25M26M:574051	TAATACGACTCACTATAGGGTATACACTTTTAATTGACAAAATAGACGACTATTCACATGCTTCAGGGATCTCTCAGTAACTTGTAG
>A02:25M26M:573951	TAATACGACTCACTATAGGGAATTTAATTTTAGGGATACACAACGATCTTAGAAGCTGTACACTAAAGATCTCTCAGTAACTTGTAG
>A02:25M26M:573851	TAATACGACTCACTATAGGGCAATATATTTAAACCACCATGCTTCATCCATGTGAGAACGGGTACTAGATCTCTCAGTAACTTGTAG
>A02:25M26M:573751	TAATACGACTCACTATAGGGCGTACAAAAATATCTGCACGTCGTATATTACATGCATTATTTACATCGATCTCTCAGTAACTTGTAG
>A02:25M26M:573401	TAATACGACTCACTATAGGGAGAGCATTAACAACGTATCTCTTGACCATCTCCTATCATTGTCAATAGATCTCTCAGTAACTTGTAG
>A02:25M26M:573301	TAATACGACTCACTATAGGGCTATCGCACATGGATACTTCGCGGCATATTTTGTTTACCAACATATAGATCTCTCAGTAACTTGTAG
>A02:25M26M:573151	TAATACGACTCACTATAGGGCTTGAAAGTAACAAAGTTTCTTATGCAAGCGTCAAACTGAAACAATAGATCTCTCAGTAACTTGTAG
>A02:25M26M:573051	TAATACGACTCACTATAGGGGAATTATTTGTTGAGCTCTATATTGCATGTCTCGAACAATCAAACCCGATCTCTCAGTAACTTGTAG
>A02:25M26M:572851	TAATACGACTCACTATAGGGGTGATAGACTCCAACTCATTTTGACAAATTTTCTTTGACCTCTTATGGATCTCTCAGTAACTTGTAG
>A02:25M26M:572801	TAATACGACTCACTATAGGGCATTCACCTCTCTTTTATCTCTTACGCGGTTCAATATCCTTTTTATGGATCTCTCAGTAACTTGTAG
>A02:25M26M:572701	TAATACGACTCACTATAGGGTAAATTTAATTAACAGATTATAGTGAAGACCAAGAAGCAGTGTGAGTGATCTCTCAGTAACTTGTAG
>A02:25M26M:572501	TAATACGACTCACTATAGGGCTGTATGTTGTAATTGATTTGCCTCATCATGGGAGCTTTAGTAATCTGATCTCTCAGTAACTTGTAG
>A02:25M26M:572401	TAATACGACTCACTATAGGGCGTCGTGGCGGCCATCATCCCGGCGGCCACGGAGGACGTTGGATCAAGATCTCTCAGTAACTTGTAG
>A02:25M26M:572251	TAATACGACTCACTATAGGGACAAAAGGGTAATTAATTCATTTCACTCCTGAGCTTAATCTCATGTTGATCTCTCAGTAACTTGTAG
>A02:25M26M:571951	TAATACGACTCACTATAGGGCTCCGGACGCAAAGAAAATAAAAACCTTACAAAAAATTGTCAGCCTAGATCTCTCAGTAACTTGTAG
>A02:25M26M:571851	TAATACGACTCACTATAGGGGAGCATGTGGGTACGGGAATCTTTATGGCCAAGGTTACGGAATAGAGGATCTCTCAGTAACTTGTAG
>A02:25M26M:571351	TAATACGACTCACTATAGGGAAATTGGTATTAAGTTATTAATAGACCTAACTTGTGGTGCCTCTATAGATCTCTCAGTAACTTGTAG
>A02:25M26M:571201	TAATACGACTCACTATAGGGAGCCGGGGACGTACACTCAGTGTTGATGAGAGGGTCACGTTCAAGATGATCTCTCAGTAACTTGTAG
>A02:25M26M:571051	TAATACGACTCACTATAGGGTGTATCGTACAATGTTGCTCCTCCTAGTTGGTCCTTTGGCCAGACCTGATCTCTCAGTAACTTGTAG
>A02:25M26M:570551	TAATACGACTCACTATAGGGCCAAACATAAAGCAAAATTAATATGTTTGATGGGAAGCTTGGCGTAGGATCTCTCAGTAACTTGTAG
>A02:25M26M:570451	TAATACGACTCACTATAGGGCTGTTATTCCTTGAATAATGCTTACAAGTTGCATATGCATAATGAATGATCTCTCAGTAACTTGTAG
>A02:25M26M:570251	TAATACGACTCACTATAGGGAAACCAGTTTTTTTTTGAAAAAGACGATGTCAGAGAGAACTGAAACTGATCTCTCAGTAACTTGTAG
>A02:25M26M:570151	TAATACGACTCACTATAGGGCATTTATACTCTCTTTCCCCACACCTGCTCTTCTCTCTCCTCAGGTTGATCTCTCAGTAACTTGTAG
>A02:25M26M:570051	TAATACGACTCACTATAGGGCCAAACATCACATGCTTTATCTCTATGTATATATGAGACATGGTTATGATCTCTCAGTAACTTGTAG
>A02:25M26M:569951	TAATACGACTCACTATAGGGACCCTTTTGATCTTCATTGCAGAGAAGCATTTAATGGCTTTGGAGAAGATCTCTCAGTAACTTGTAG
>A02:25M26M:569851	TAATACGACTCACTATAGGGATTCAAGAAGAAGAAGAAGAAGCAGAGAGGTTCTTCTAGGTTTTGTAGATCTCTCAGTAACTTGTAG
>A02:25M26M:569751	TAATACGACTCACTATAGGGCTTTACGGTCCTCAAAACTGGAACCACATTGCAGAGAAGATGCAAGGGATCTCTCAGTAACTTGTAG
>A02:25M26M:569601	TAATACGACTCACTATAGGGTTAACCAGCTAGACCCAAGGATCAACAAAAGAGAATTCAGTGTTGAGGATCTCTCAGTAACTTGTAG
>A02:25M26M:569501	TAATACGACTCACTATAGGGGATTGCTAAGCTTTTCAATGGAAGAACAGACAATGCATTGAAGAATCGATCTCTCAGTAACTTGTAG
>A02:25M26M:569351	TAATACGACTCACTATAGGGCACTCTTCCTCCTGGTTTGTGTCTTCTTCTTACTCTATCTAGTATACGATCTCTCAGTAACTTGTAG
>A02:25M26M:569201	TAATACGACTCACTATAGGGTACAACTAACCTGAAAGCTCAGTATCTGCAAGAAGAGTATTGTTCTTGATCTCTCAGTAACTTGTAG
>A02:25M26M:569101	TAATACGACTCACTATAGGGTCCTTGGCACTGACACTGCATGTCTCCATCCAGGAACCATCACTGTCGATCTCTCAGTAACTTGTAG
>A02:25M26M:569051	TAATACGACTCACTATAGGGATCATCATGTGCAGAACATAGAGTGGTGGCCAGATATTTTGAGACCAGATCTCTCAGTAACTTGTAG
>A02:25M26M:568901	TAATACGACTCACTATAGGGACTCATGTCATTATTACCAGAGTCCTTGTCTTTTGTAAGCAAGTAACGATCTCTCAGTAACTTGTAG
>A02:25M26M:564051	TAATACGACTCACTATAGGGTGTTCATCCAAGACTCATTGTGCGATTGAGAGAAGTCTATCACAAGGGATCTCTCAGTAACTTGTAG
>A02:25M26M:563951	TAATACGACTCACTATAGGGCCCGCATAAGCACAGGTTATATACAAAACAAAAGAGGTCCCAAGTTGGATCTCTCAGTAACTTGTAG
>A02:25M26M:562751	TAATACGACTCACTATAGGGGTTTTAGGTTAAAAATAGACTTCGTAGGTTAGAGGTCTGTAAGTCTAGATCTCTCAGTAACTTGTAG
>A02:25M26M:562651	TAATACGACTCACTATAGGGTCTAGTAGTTAGTTGGTAGTGAATCCCTATCGTGTAGGACTTTAAATGATCTCTCAGTAACTTGTAG
>A02:25M26M:562551	TAATACGACTCACTATAGGGATTCCTTTTTCGTGATCCGTAAACTTAAATAGGACTACCTGTTCAAGGATCTCTCAGTAACTTGTAG
>A02:25M26M:562351	TAATACGACTCACTATAGGGCTGAATCGTTTATGTGTAAACAAGCCTTTAAAATTTGGAGACTATAAGATCTCTCAGTAACTTGTAG
>A02:25M26M:562251	TAATACGACTCACTATAGGGACAATAAGTAATCACGTTTCTCTTGCTTTTCTCTTTTGATGAACTCAGATCTCTCAGTAACTTGTAG
>A02:25M26M:562151	TAATACGACTCACTATAGGGACTCTCTTTCTATAGAAGTTCAAACTGTACACGTTAAAGTTCACTTAGATCTCTCAGTAACTTGTAG
>A02:25M26M:562051	TAATACGACTCACTATAGGGTCAGCAATGGAAGAAGATAACCAAGAAAAACAACTTGAAGATGGCGGGATCTCTCAGTAACTTGTAG
>A02:25M26M:561751	TAATACGACTCACTATAGGGTGCATGAACGCTGATCGCAGCATTAAAACCTATCCGGACATTGGAGAGATCTCTCAGTAACTTGTAG
>A02:25M26M:561651	TAATACGACTCACTATAGGGAACTATACCTAGTCACCACTGGCTTCTTGATCATGGAAGGAGACAATGATCTCTCAGTAACTTGTAG
>A02:25M26M:561501	TAATACGACTCACTATAGGGTTTGGTGGGATAATCTAAGCGTCTTGTCTTATGTTTCTATGAGTGGTGATCTCTCAGTAACTTGTAG
>A02:25M26M:561401	TAATACGACTCACTATAGGGTGGAATCGGGTTTCGTCAAAGTGGAAAGCTGATTAACTGGAGTGGCAGATCTCTCAGTAACTTGTAG
>A02:25M26M:561301	TAATACGACTCACTATAGGGCCCACTTTGTATAATTCCATGAAAAGTAAACATCAGTTCAACAATGTGATCTCTCAGTAACTTGTAG
>A02:25M26M:561001	TAATACGACTCACTATAGGGCTTATAAGTTTTATATTATGCACCATAGGCTACACATCAATGGCGGTGATCTCTCAGTAACTTGTAG
>A02:25M26M:560901	TAATACGACTCACTATAGGGTTCCGACTCATAAGACGAGCTCAAAGGTGGCAATATACACAACCCTCGATCTCTCAGTAACTTGTAG
>A02:25M26M:560801	TAATACGACTCACTATAGGGAAAAGATTGGTTTCCTTCGCGTTACGCCAAGAAAACATATTTGCATCGATCTCTCAGTAACTTGTAG
>A02:25M26M:560701	TAATACGACTCACTATAGGGCCGTTCTTCGGTTATATGATGTCTTTGGTTGGAGCGTTACTGAGTGTGATCTCTCAGTAACTTGTAG
>A02:25M26M:560601	TAATACGACTCACTATAGGGTCAAGAAGTTTGGGTTTGAGACTATCATGTTGTTTGGTATGGTGGCTGATCTCTCAGTAACTTGTAG
>A02:25M26M:560351	TAATACGACTCACTATAGGGCATATTAGTGAGATACTTTATACTTTGTGTGGATATTAACATCCACTGATCTCTCAGTAACTTGTAG
>A02:25M26M:560251	TAATACGACTCACTATAGGGAAAAGAGAGTTAGTGAAATTTAGAGTAGATACACACAATGGCTAAAGGATCTCTCAGTAACTTGTAG
>A02:25M26M:560151	TAATACGACTCACTATAGGGATAGGAAGAAGATGAGTGGATCTGATGCTCCTTCTCATAGCGTCTTTGATCTCTCAGTAACTTGTAG
>A02:25M26M:559951	TAATACGACTCACTATAGGGAAGTAAGTTTTCATTTCTGCATAAATCAATCACTATCCTCAAGAACCGATCTCTCAGTAACTTGTAG
>A02:25M26M:559851	TAATACGACTCACTATAGGGTGACTCCATTCGCATAGTTTACACGTTTCTTATGTTTGTTTTATAATGATCTCTCAGTAACTTGTAG
>A02:25M26M:559751	TAATACGACTCACTATAGGGTACACCATAGATTACACAACAATGGCGCTTTTGTGCTACTTAATGAAGATCTCTCAGTAACTTGTAG
>A02:25M26M:559651	TAATACGACTCACTATAGGGAAGACGGCAATATAGACAACACTCCTAGCTAAACCATCCAAATACGCGATCTCTCAGTAACTTGTAG
>A02:25M26M:553301	TAATACGACTCACTATAGGGGGCCGAAACGTTGACTTAGTCTTAACTACTTTTTATCTCTCTCGAAAGATCTCTCAGTAACTTGTAG
>A02:25M26M:550801	TAATACGACTCACTATAGGGGTAACGCCCCCTCGATGTGGATCCAATTGATCTCAAAACAAATTATTGATCTCTCAGTAACTTGTAG
>A02:25M26M:550701	TAATACGACTCACTATAGGGTCCCTCCCGCTCTCACGGACTCCAAAGCAAAAGGCTCCAAGAATCTCGATCTCTCAGTAACTTGTAG
>A02:25M26M:550601	TAATACGACTCACTATAGGGCACCGTGAGTTCTCTCTCTTTCTCTCCCCCGTAATCTCTCACTCTTTGATCTCTCAGTAACTTGTAG
>A02:25M26M:550351	TAATACGACTCACTATAGGGCAGTTATCGTTTTAAACCTTCTCTAGACTCAATCACAATCAGGTTGGGATCTCTCAGTAACTTGTAG
>A02:25M26M:552701	TAATACGACTCACTATAGGGAGATTGGTGGAAGATGGGAAGAGTGTTCGTGATAGAACTCGAGGGAGGATCTCTCAGTAACTTGTAG
>A02:25M26M:558701	TAATACGACTCACTATAGGGACACACATCGGAGTCCCCAGTGATATCATCTCTAAAGAGATCGAGGTGATCTCTCAGTAACTTGTAG
>A02:25M26M:558601	TAATACGACTCACTATAGGGTTTTCTTTTCAGGAAGTTTTTGACATCCATGACAATGACATCATATAGATCTCTCAGTAACTTGTAG
>A02:25M26M:535651	TAATACGACTCACTATAGGGTATATCCTTAATTTTGGTGGCAGCTATAATACAATAATTCTGGCTGAGATCTCTCAGTAACTTGTAG
>A02:25M26M:558401	TAATACGACTCACTATAGGGTGTCGGTTGTGCTAATATCATTGGCATACATAACGTAAGAAAAGACCGATCTCTCAGTAACTTGTAG
>A02:25M26M:549851	TAATACGACTCACTATAGGGTGCTTTTGTGGTTTCTTTCTCACAGGTAACTGGGGGTTCTTACTGGGGATCTCTCAGTAACTTGTAG
>A02:25M26M:535201	TAATACGACTCACTATAGGGGAATAGTCTCAAGAACAAATGACATATTCTTCCTTTTGGGATTTGATGATCTCTCAGTAACTTGTAG
>A02:25M26M:557501	TAATACGACTCACTATAGGGAAAGACGACAAAGAGGCATTGATAAACACCATAAAAGATTAGTTCCTGATCTCTCAGTAACTTGTAG
>A02:25M26M:557451	TAATACGACTCACTATAGGGCGGTACCCATAACAATCATATTTACATCTCTTGAAAAGTACATTATTGATCTCTCAGTAACTTGTAG
>A02:25M26M:552801	TAATACGACTCACTATAGGGTTCCTCCTTGATCGTTCTTGATGATTATTGTCGTTGTCTTGCATATCGATCTCTCAGTAACTTGTAG
>A02:25M26M:558801	TAATACGACTCACTATAGGGTTCACGATCTTGTGGGACTAGGATCTCCAGGTTGGTGAAAATGGGAAGATCTCTCAGTAACTTGTAG
>A02:25M26M:552651	TAATACGACTCACTATAGGGTGTATACATGCAAAAAGTGCCACACACATCTCGCACTCCCCAGTGATGATCTCTCAGTAACTTGTAG
>A02:25M26M:535801	TAATACGACTCACTATAGGGACACTGCATGCATTTTGACATGCCTCTGATGTTTTCTTTTCAGGATGGATCTCTCAGTAACTTGTAG
>A02:25M26M:552451	TAATACGACTCACTATAGGGTGCTTGAGAATTTTAACCAATATATATAACCTTAATTTTGGTGGCAGGATCTCTCAGTAACTTGTAG
>A02:25M26M:552351	TAATACGACTCACTATAGGGGTTCCAATGAGATCGGCATTTATGGCGTAAGAAAATTAAGACCCCCAGATCTCTCAGTAACTTGTAG
>A02:25M26M:535501	TAATACGACTCACTATAGGGATTCTTCAACTTTATATCTGTGTTCATTGATTGTGTACGTGGTTTCTGATCTCTCAGTAACTTGTAG
>A02:25M26M:558251	TAATACGACTCACTATAGGGCTACTTACTGGGCTATGAGGTAATGTGATATTTTTCTTTGTTAAATCGATCTCTCAGTAACTTGTAG
>A02:25M26M:552101	TAATACGACTCACTATAGGGGGGCCGAACTCCATGGACCGGAAGGAAGCGATGATGAGGTTTAGGAGGATCTCTCAGTAACTTGTAG
>A02:25M26M:535101	TAATACGACTCACTATAGGGCTATCACTGGTGACATGTGAACTGAGTCATCTATTTGACTTTGTTTTGATCTCTCAGTAACTTGTAG
>A02:25M26M:551801	TAATACGACTCACTATAGGGATTCTGTTTTTCTTCTTCTGAGATCGTCAGGTTCATTGATAGCAAAGGATCTCTCAGTAACTTGTAG
>A02:25M26M:543701	TAATACGACTCACTATAGGGCCAGTTTCATAAATGAACATGGACACAACAAATACACTCATACACATGATCTCTCAGTAACTTGTAG
>A02:25M26M:527801	TAATACGACTCACTATAGGGATCAAACTAAAATGGTCTATCGGAAAACTTTAATCCTCAGGGTCTTCGATCTCTCAGTAACTTGTAG
>A02:25M26M:534101	TAATACGACTCACTATAGGGGCAATGCCCACCTAAAGGCCGAAACCTTGACTTAGTCTTAAACTCTTGATCTCTCAGTAACTTGTAG
>A02:25M26M:550451	TAATACGACTCACTATAGGGTGTAGCTTTTATCTCTTTTCTTGGAAACCGCGAACTGGTTCTTGGTAGATCTCTCAGTAACTTGTAG
>A02:25M26M:535951	TAATACGACTCACTATAGGGGGTGGAAAATGGGAAGAGCGTTCGGGATAGAACTCGAGGGAGCAGTGGATCTCTCAGTAACTTGTAG
>A02:25M26M:535851	TAATACGACTCACTATAGGGAGGAGACCGAGGTTTTAATTTCTCACACTTACATCTCATCTTTTAACGATCTCTCAGTAACTTGTAG
>A02:25M26M:535751	TAATACGACTCACTATAGGGGCCTCGTATATGTGTTCAGTAGACTGTAAGTGTATTATATGCGCTTCGATCTCTCAGTAACTTGTAG
>A02:25M26M:535451	TAATACGACTCACTATAGGGTCACAGGTAAGTGATCCAAATAGTTTCAGGGTTTTGAGGTAATGTGAGATCTCTCAGTAACTTGTAG
>A02:25M26M:535351	TAATACGACTCACTATAGGGAACGACATGCTTATAATATGTAGGAGCGAACTCCATGGACCGGAAGGGATCTCTCAGTAACTTGTAG
>A02:25M26M:552001	TAATACGACTCACTATAGGGTCAATTTCATATTACTTTGTATAGCGTGTGAAAAGTCCCAAGAACAAGATCTCTCAGTAACTTGTAG
>A02:25M26M:551901	TAATACGACTCACTATAGGGTTTACACTTCTTCTATGTGTACAATGAAATTAGCTATCACTAGTGACGATCTCTCAGTAACTTGTAG
>A02:25M26M:544001	TAATACGACTCACTATAGGGTGACCTTGTTTTGTGTTATTATTTTGTCTGCCACATTCTGTTTTTCTGATCTCTCAGTAACTTGTAG
>A02:25M26M:534301	TAATACGACTCACTATAGGGATTTGAAAGTGTATGAACTATACTGTACCAGGTGTCTAATGGTGAATGATCTCTCAGTAACTTGTAG
>A02:25M26M:543651	TAATACGACTCACTATAGGGACAACAATCTGACAATCATACACCATGGGGACTTTTTTGGTTTTGAAGATCTCTCAGTAACTTGTAG
>A02:25M26M:534701	TAATACGACTCACTATAGGGTTCACACACGTACAAGATCAACTTGACTATTTTAAATGTTCAAAACAGATCTCTCAGTAACTTGTAG
>A02:25M26M:543451	TAATACGACTCACTATAGGGAGAAACAGAGTATGACTGTTGACAAAGAACAAGAAAAAGATTATCATGATCTCTCAGTAACTTGTAG
>A02:25M26M:543351	TAATACGACTCACTATAGGGAGGAAAGTAGGCTACGATACGAGGTTATAAACAGAGCCACTACTTACGATCTCTCAGTAACTTGTAG
>A02:25M26M:543251	TAATACGACTCACTATAGGGAGATGAGTAGTTCTGAATCTCCGTCGCACAATGTCTTCGTCTATGGCGATCTCTCAGTAACTTGTAG
>A02:25M26M:543051	TAATACGACTCACTATAGGGAGTCACAGGTACAGACTCAAAGGGCGTTTGCATCCTTGTATTGCTCCGATCTCTCAGTAACTTGTAG
>A02:25M26M:542951	TAATACGACTCACTATAGGGAGCAAACAAAACCTAATCTTCAAAAACTTCTGTGCATGTATGTAATTGATCTCTCAGTAACTTGTAG
>A02:25M26M:614851	TAATACGACTCACTATAGGGAGGTGAAGAGTACTCATTCATAAACAAGATAACATTTATAAAATCCCGATCTCTCAGTAACTTGTAG
>A02:25M26M:542351	TAATACGACTCACTATAGGGAATGCACGTAAACTAATTAAGTTTGGTTCATTTGAATTCACTTGTGAGATCTCTCAGTAACTTGTAG
>A02:25M26M:542201	TAATACGACTCACTATAGGGCAGGTACTAACCGGATTAACAAATGCTCAGCTAGAGAACTTAGATATGATCTCTCAGTAACTTGTAG
>A02:25M26M:542051	TAATACGACTCACTATAGGGTTGAAGCTTTGATCTCCCTTTATGCAGGATACGTTGGAGAAAATGCAGATCTCTCAGTAACTTGTAG
>A02:25M26M:541951	TAATACGACTCACTATAGGGGGGATTTTGAGGTTGAACTCATACGCTTACAAGTTTCCAGAGCATCAGATCTCTCAGTAACTTGTAG
>A02:25M26M:541701	TAATACGACTCACTATAGGGAATGAAGATCCTCCCGTGGCTTGAAGAATGTGTTATCTAATCTTTATGATCTCTCAGTAACTTGTAG
>A02:25M26M:538501	TAATACGACTCACTATAGGGTGTGTATGTGGTCCAAATCCAAAAGAAAATTTCTTACTGATTTGGAAGATCTCTCAGTAACTTGTAG
>A02:25M26M:538401	TAATACGACTCACTATAGGGTATTAAACAGAGAATCCAAAGTATCATGCCTATCCACTAACAGTCTAGATCTCTCAGTAACTTGTAG
>A02:25M26M:538301	TAATACGACTCACTATAGGGAAACAGAAGATAAAGCCAGAGGTATTAACTACCTCCAATAATGATAGGATCTCTCAGTAACTTGTAG
>A02:25M26M:538001	TAATACGACTCACTATAGGGATGTGCATAAATAAAGGAAGATATTACTAACTCTCTCTCACGTGGATGATCTCTCAGTAACTTGTAG
>A02:25M26M:537851	TAATACGACTCACTATAGGGTCCGTCGTCAGTTTGATCCTCGGATGCAATCCGGTCGCCGTCTCCGCGATCTCTCAGTAACTTGTAG
>A02:25M26M:537701	TAATACGACTCACTATAGGGTTGTTTTGCAGTCATGTGTATAGGCTGAAAGGGCGTTTGCATGCATGGATCTCTCAGTAACTTGTAG
>A02:25M26M:537551	TAATACGACTCACTATAGGGATCGGTTTGGTGCAGATACTAACTGGATTGACAGATGGTCAGCTAGAGATCTCTCAGTAACTTGTAG
>A02:25M26M:537451	TAATACGACTCACTATAGGGTATTAAACGTAAGTATTATTACTTCACTTCATCGTCTACTAATCTGCGATCTCTCAGTAACTTGTAG
>A02:25M26M:537351	TAATACGACTCACTATAGGGATGAAAGTGGAAACTTATGTATGGGCTAACAAGGATGATCCTGATATGATCTCTCAGTAACTTGTAG
>A02:25M26M:537251	TAATACGACTCACTATAGGGCTACATGATTTAGTCTTTTCTTAGCTTAATGGTTTTAGCGCAAACACGATCTCTCAGTAACTTGTAG
>A02:25M26M:537101	TAATACGACTCACTATAGGGGGAGATCAAGGGAGGAGTTTGAGAAATATGTACATGAAGATCCTATTGATCTCTCAGTAACTTGTAG
>A02:25M26M:537001	TAATACGACTCACTATAGGGGAAATCACTCTCTCTATCTATATCTTCTACTGCAAGTAAGAGCTTTAGATCTCTCAGTAACTTGTAG
>A02:25M26M:536901	TAATACGACTCACTATAGGGTTGAGTTAGTTGTATGCAGGTGTCGTATCATTATTATTGTACTAGTAGATCTCTCAGTAACTTGTAG
>A02:25M26M:536851	TAATACGACTCACTATAGGGCAGCTTGTACTTACTTGCAGTTTGAATTGGAAATAAAAACATCCAACGATCTCTCAGTAACTTGTAG
>A02:25M26M:536751	TAATACGACTCACTATAGGGATTTTGGCAAACCATTAAAACAGTCTAGACAATACGTTTCCCATCATGATCTCTCAGTAACTTGTAG
>A02:25M26M:526751	TAATACGACTCACTATAGGGAAGCTTACACTATTGTTTTCCTTTATCTCCTACTACGTTTCACTGAGGATCTCTCAGTAACTTGTAG
>A02:25M26M:526601	TAATACGACTCACTATAGGGCACAAGAAAGTTTAACTTAATTTCTTCAACACTTTCCTATAATGCCAGATCTCTCAGTAACTTGTAG
>A02:25M26M:526501	TAATACGACTCACTATAGGGGCCCCGTTTATTTCTTGTTTATTTCATGCCATAAAGATCTATTTTAAGATCTCTCAGTAACTTGTAG
>A02:25M26M:524551	TAATACGACTCACTATAGGGAAACACCAGCTGAGTCACGATCTTTTAAGTGATCGAACCCTGAAAATGATCTCTCAGTAACTTGTAG
>A02:25M26M:524451	TAATACGACTCACTATAGGGTGTCTCAGAATCCGGAGAAACCATTTGATCCGCGGAGTTCTGAGTTGGATCTCTCAGTAACTTGTAG
>A02:25M26M:524301	TAATACGACTCACTATAGGGAGTAGAACGTCTTGATTCAGTAGAAGAAGATGTTGTTGCTGTATTGAGATCTCTCAGTAACTTGTAG
>A02:25M26M:524201	TAATACGACTCACTATAGGGATATCGGTTTGAAGTCTTCTTTCCCATTGGCCTCTTGCGATGTTTGAGATCTCTCAGTAACTTGTAG
>A02:25M26M:523751	TAATACGACTCACTATAGGGCAACTCTTGCTGCATCTAAGCAACCCTGAATTTTACAAGAACAAATGGATCTCTCAGTAACTTGTAG
>A02:25M26M:523551	TAATACGACTCACTATAGGGTGATCCCTTGTCTATATCTTACCTACATAACCCTAATAATATCTCTAGATCTCTCAGTAACTTGTAG
>A02:25M26M:523451	TAATACGACTCACTATAGGGAAGAAGATTAGACATACCAGTATTGGTGGGAACAGCTCTCCAATTACGATCTCTCAGTAACTTGTAG
>A02:25M26M:523251	TAATACGACTCACTATAGGGCCCTTTTCTCTTTTTGCCTCACTTAAGTTTTCCACTAACAACTTTTTGATCTCTCAGTAACTTGTAG
>A02:25M26M:523151	TAATACGACTCACTATAGGGGTACTCTTTAAGCTCACTAATGGCACTCTTAGTTTTGGAAGGATCTAGATCTCTCAGTAACTTGTAG
>A02:25M26M:523051	TAATACGACTCACTATAGGGAATAGAAAGATAAAATTGCTGACCCCTCTTGGTCTTGGGCCATTGGTGATCTCTCAGTAACTTGTAG
>A02:25M26M:522801	TAATACGACTCACTATAGGGTCATAAAAATTAAGAACAATGGGGAAATGCATGACAACATGGTAAATGATCTCTCAGTAACTTGTAG
>A02:25M26M:522701	TAATACGACTCACTATAGGGTTAAGAATTGAATAGGGACTATGCATTTATGTGTAAGACGTAGCTCGGATCTCTCAGTAACTTGTAG
>A02:25M26M:522501	TAATACGACTCACTATAGGGTACATGATGATCTACGTCATTCATGATGTTATTGTTAATTTGGTATGGATCTCTCAGTAACTTGTAG
>A02:25M26M:522201	TAATACGACTCACTATAGGGAGATGATAACAATTTTGTTTTCACGAGGCCGGAAGGAAAGGAAGAAGGATCTCTCAGTAACTTGTAG
>A02:25M26M:522101	TAATACGACTCACTATAGGGCTATTTATTTATGCAGGTAAGGTTTTCTATAGTTTGTACAAGTGTGAGATCTCTCAGTAACTTGTAG
>A02:25M26M:522051	TAATACGACTCACTATAGGGTACCAATTGTTGCTAGCTTATATAATCGTGTTAACAGGCTGTTTATCGATCTCTCAGTAACTTGTAG
>A02:25M26M:521451	TAATACGACTCACTATAGGGAAATGACGACTTCATAACATGGAATGCATGTGGTGATGTATATGGTGGATCTCTCAGTAACTTGTAG
>A02:25M26M:521151	TAATACGACTCACTATAGGGTTATCAGCAAGTGACAGTGCATGCGATCGGTATCAATGTATCATGTTGATCTCTCAGTAACTTGTAG
>A02:25M26M:521001	TAATACGACTCACTATAGGGGATTGTTAAATACTTGTATTATTAAGGCTATTGAATATTTGGGCCTCGATCTCTCAGTAACTTGTAG
>A02:25M26M:520101	TAATACGACTCACTATAGGGATATCGAGAGACAGAGAGCTACAAGCACCAGAAACGTTCAATACTATGATCTCTCAGTAACTTGTAG
>A02:25M26M:520001	TAATACGACTCACTATAGGGTTTTGTTTCACGAGTCAAATCCACTTTACCACACAAGAGGAGTTTCTGATCTCTCAGTAACTTGTAG
>A02:25M26M:519901	TAATACGACTCACTATAGGGTGCAACAAGGAGGAAATGAACAAAAACGTTAGTTAGACGTTTTTAAAGATCTCTCAGTAACTTGTAG
>A02:25M26M:519801	TAATACGACTCACTATAGGGTTATATCAGATATTCGAGGAACCAAGTCGCTATTTCAGCATCATTAGGATCTCTCAGTAACTTGTAG
>A02:25M26M:519701	TAATACGACTCACTATAGGGAAACATTCCACTTTAGCGTCACAGATCACACACCTGTGGTGGTCGCCGATCTCTCAGTAACTTGTAG
>A02:25M26M:519601	TAATACGACTCACTATAGGGATGGGAAGTTTGCCCATAGGAGCATGCTCTTGTTGCACCAGAAACACGATCTCTCAGTAACTTGTAG
>A02:25M26M:519451	TAATACGACTCACTATAGGGATTGCTTTACTTGATAAAAGTCGAACTCACGGAGAAAGAATATGGATGATCTCTCAGTAACTTGTAG
>A02:25M26M:519351	TAATACGACTCACTATAGGGATGATGATAGCTGTAAGAAGCATCCAAAGGAGGTTCTGGCTTCAAGGGATCTCTCAGTAACTTGTAG
>A02:25M26M:519151	TAATACGACTCACTATAGGGATGAGACTTTCGGTTTGTTTGGAGAGAGAGAGACATTGCTGAAAATGGATCTCTCAGTAACTTGTAG
>A02:25M26M:518851	TAATACGACTCACTATAGGGCAAGGGAGGAGTGGTTGAGTTCCATGCCAAAATCAGCTCTGAAATCGGATCTCTCAGTAACTTGTAG
>A02:25M26M:519751	TAATACGACTCACTATAGGGGACGACTTGAATGCCTATGATGATCGAATCCAAACGGTGGAGACAAGGATCTCTCAGTAACTTGTAG
>A02:25M26M:519651	TAATACGACTCACTATAGGGAGACTCTGCGATCTTGTGTTTACAAGAGCTGCACCAGAGTTTGTGTCGATCTCTCAGTAACTTGTAG
>A02:25M26M:519401	TAATACGACTCACTATAGGGCTGTTTCTGATCCTTGCAAGTGCCTCTAGAACCGGATGTTTTAGCTGGATCTCTCAGTAACTTGTAG
>A02:25M26M:519101	TAATACGACTCACTATAGGGTTCAAGGTTTGAGAGTCATGTGCTTGTTGTGTGGATTTGAGAGCTGGGATCTCTCAGTAACTTGTAG
>A02:25M26M:519001	TAATACGACTCACTATAGGGTGAGTGGCTCTGGAGGTCTTCCTTTGAGCTGAGAACACTTGGAGGGTGATCTCTCAGTAACTTGTAG
>A02:25M26M:518901	TAATACGACTCACTATAGGGTTGACAGAGTTTTGGAAAATATTTGATGAAGTCGATGAGCTTGGAGAGATCTCTCAGTAACTTGTAG
>A02:25M26M:518801	TAATACGACTCACTATAGGGTTGAGTGATGAGAGGGGATATCCATTAATCTCTCTGTACCTCTCTGAGATCTCTCAGTAACTTGTAG
>A02:25M26M:518701	TAATACGACTCACTATAGGGGCACGGCAGTGCCGGTGAAACTGGTTTCTTCATCATCTCCTTTAGCAGATCTCTCAGTAACTTGTAG
>A02:25M26M:518601	TAATACGACTCACTATAGGGCACAATGCTTGTTGTCCATATAGAAGTACAAATACTTACAGCAAGTGGATCTCTCAGTAACTTGTAG
>A02:25M26M:518501	TAATACGACTCACTATAGGGTGGTCTCTGTTTTCTGCACAAGATGTATGAAACATGTAACCAATCAGGATCTCTCAGTAACTTGTAG
>A02:25M26M:518451	TAATACGACTCACTATAGGGAAGGTGATCATAGAAAAGACCCATAGGTAAAACAAATTGTTTGTGCAGATCTCTCAGTAACTTGTAG
>A02:25M26M:518351	TAATACGACTCACTATAGGGCTCAACGCAATCAAGATGGTTATTCTTCACTGCGAAGAATAGTGGTGGATCTCTCAGTAACTTGTAG
>A02:25M26M:518251	TAATACGACTCACTATAGGGATCTGTAGGCTCAAAATGTCATTATCTTGTTTCAGCTTGGGATGAGAGATCTCTCAGTAACTTGTAG
>A02:25M26M:518151	TAATACGACTCACTATAGGGCAGCAGCTAAGTGGACTGCAGATAAACCCAACTTGTTCTTATGGGTAGATCTCTCAGTAACTTGTAG
>A02:25M26M:518051	TAATACGACTCACTATAGGGACTATTCTCAAGTTGGGAAGAATCACCACGCGACGTTATTGTATGTGGATCTCTCAGTAACTTGTAG
>A02:25M26M:517951	TAATACGACTCACTATAGGGATGATCCCTTCAGGCAGCAGTGAAGAGCGGTGTTCCCTTCTGCATCTGATCTCTCAGTAACTTGTAG
>A02:25M26M:517851	TAATACGACTCACTATAGGGTCCTGCCTACAGAATCGATAATGGAATATTACATTACAACCCTCATAGATCTCTCAGTAACTTGTAG
>A02:25M26M:517751	TAATACGACTCACTATAGGGAGGTTTGCTTATCCACAGATTCACTAAAAACTGCAGCACCAAAGAGCGATCTCTCAGTAACTTGTAG
>A02:25M26M:517651	TAATACGACTCACTATAGGGCAACGCTTCTAGAATAACAAACTCATAGATCGTTGTCTTCGGCTTTGGATCTCTCAGTAACTTGTAG
>A02:25M26M:517551	TAATACGACTCACTATAGGGTCAACCGCTACAATCAGCAACGCAGTCAAAGGAACTATTTCACCAGCGATCTCTCAGTAACTTGTAG
>A02:25M26M:517451	TAATACGACTCACTATAGGGGTCTCACCACCGTCAGATCCTTCGCATAAAAAAGATCAAACTTTTTAGATCTCTCAGTAACTTGTAG
>A02:25M26M:517401	TAATACGACTCACTATAGGGGACAAGCTGTACATTCCATAATCAAATCCAAGTAGGGAACTAGTGTTGATCTCTCAGTAACTTGTAG
>A02:25M26M:517301	TAATACGACTCACTATAGGGTCCCAGGTCACATCCATGCTACAAAACAAGGAAAAAAATGTTAATAAGATCTCTCAGTAACTTGTAG
>A02:25M26M:517201	TAATACGACTCACTATAGGGGCAGTGTCATTAGTAGGTACAAAGTAAATAACTTTCCTGAACAAGGTGATCTCTCAGTAACTTGTAG
>A02:25M26M:516851	TAATACGACTCACTATAGGGGACAATACCTTCCGCTGCAGAGAGAAAGCTCCAGAGGAAGCAAAGCGGATCTCTCAGTAACTTGTAG
>A02:25M26M:516701	TAATACGACTCACTATAGGGCCGTATCCTCCGCCGCGTCGTTGATGTACGGAACCGATCCGATGTCTGATCTCTCAGTAACTTGTAG
>A02:25M26M:516601	TAATACGACTCACTATAGGGGAGAAGCTTGAGCGCCTCGCCTCGCTCGCGCTCCGAGTCTTGACCTAGATCTCTCAGTAACTTGTAG
>A02:25M26M:516351	TAATACGACTCACTATAGGGCTCGGAGAGTGAGATGAATCGCACCAGTTCCATCTCTGAGCCCTAGCGATCTCTCAGTAACTTGTAG
>A02:25M26M:516251	TAATACGACTCACTATAGGGTCTAAGTTTGTTTAACTGATTTTGATCGGAGAGAAGCGGAAGAGAGCGATCTCTCAGTAACTTGTAG
>A02:25M26M:516151	TAATACGACTCACTATAGGGACGGAGAGGGAAAATGGAGAGATTTATAGCAGGTGACGTGGGTGTAGGATCTCTCAGTAACTTGTAG
>A02:25M26M:516001	TAATACGACTCACTATAGGGGATGTGGCGAATAAACTCCGTACTCTTTTGTTTTTGAATCATTATGGGATCTCTCAGTAACTTGTAG
>A02:25M26M:502851	TAATACGACTCACTATAGGGACATCATTAAGTATTCTGTCGGGGCATACTATCATTTCTTTAAAACAGATCTCTCAGTAACTTGTAG
>A02:25M26M:502751	TAATACGACTCACTATAGGGACATGACTCGTTGAAATCACTATTATGGCATGCTGTTTACTATTATTGATCTCTCAGTAACTTGTAG
>A02:25M26M:502701	TAATACGACTCACTATAGGGACGCATTTTCGTAATCTCGTACTTAAACTACGACGTTGATTACGCAGGATCTCTCAGTAACTTGTAG
>A02:25M26M:500051	TAATACGACTCACTATAGGGGTGGAGCCTAAGAGACCAAACATTCAGTGCGTGAAACCCACATGGACGATCTCTCAGTAACTTGTAG
>A02:25M26M:499901	TAATACGACTCACTATAGGGACTGTCGATGAATACAAATGGATTCTAAACTATGTTAATCCGTTAATGATCTCTCAGTAACTTGTAG
>A02:25M26M:499801	TAATACGACTCACTATAGGGCAACACCAAAGGTGTTATATATTGATGAAGTCCTTCAAACAAGATAGGATCTCTCAGTAACTTGTAG
>A02:25M26M:499701	TAATACGACTCACTATAGGGAAAAAAAGGATTTCATTGTTGCAACCAAAAAATTCCCATGTTCCCGAGATCTCTCAGTAACTTGTAG
>A02:25M26M:499551	TAATACGACTCACTATAGGGCAAAAACAATGTGTATTCTATCCATTCTGCATATTGTGCTTGTTCGAGATCTCTCAGTAACTTGTAG
>A02:25M26M:499251	TAATACGACTCACTATAGGGGTACATACTTTGGTGTCCTCATGAAATACCGTAAAAATTATTAATACGATCTCTCAGTAACTTGTAG
>A02:25M26M:499001	TAATACGACTCACTATAGGGTTAAGCTAGAAGATTACTATGAGCTTAGGACACCAATTACTTCATTTGATCTCTCAGTAACTTGTAG
>A02:25M26M:497151	TAATACGACTCACTATAGGGACGTAATTAAGTACCTTGTGTCCCCTGTATTAATCATGTTTAAGAATGATCTCTCAGTAACTTGTAG
>A02:25M26M:497051	TAATACGACTCACTATAGGGCTATCATTAGGTATACTAAATCCCAAGCTTCGGAAACATAGAAGTTAGATCTCTCAGTAACTTGTAG
>A02:25M26M:496951	TAATACGACTCACTATAGGGGGCAATCAAGTGCATGGACGAAGCAAGTCCACGCTTGGTTCGATTTTGATCTCTCAGTAACTTGTAG
>A02:25M26M:496901	TAATACGACTCACTATAGGGTGTAATACTTGGATTCAGCGAAAACTGAAAACAAACAACGTCCCAAAGATCTCTCAGTAACTTGTAG
>A02:25M26M:496401	TAATACGACTCACTATAGGGAAGGAAAATTGAAAGTCTATGTCATCACATGGTATTGCCTTTTAGTGGATCTCTCAGTAACTTGTAG
>A02:25M26M:496301	TAATACGACTCACTATAGGGTCCAACTTCAATTTCTACACCAGCTTTGGGAACACACAGTTCTTTCCGATCTCTCAGTAACTTGTAG
>A02:25M26M:494101	TAATACGACTCACTATAGGGTGTCTAGGTTTATTACTCTATCACTCTCCTGTGGTCCTTGACCTCTTGATCTCTCAGTAACTTGTAG
>A02:25M26M:493951	TAATACGACTCACTATAGGGTCTTCTGTCACATCTTCAACACAATACAAAACTTGTGGGATACATAAGATCTCTCAGTAACTTGTAG
>A02:25M26M:493801	TAATACGACTCACTATAGGGAATCAAGAGACAGAGAGAAAGCACACGAGTTAAGGGTTATTTTCTTGGATCTCTCAGTAACTTGTAG
>A02:25M26M:493651	TAATACGACTCACTATAGGGAGATGATCGACCTTGTTAGTAAGCTTTGTCAGCTTTTGCCCGAGATTGATCTCTCAGTAACTTGTAG
>A02:25M26M:493451	TAATACGACTCACTATAGGGTTGACTCCGGACAACGTTATTGTTTTCTAATTTGATAAAATGAAACTGATCTCTCAGTAACTTGTAG
>A02:25M26M:493351	TAATACGACTCACTATAGGGTGATGTTTGCTCTTAATAATATATTAGGTGTCAGCATCAAAGGTACTGATCTCTCAGTAACTTGTAG
>A02:25M26M:493201	TAATACGACTCACTATAGGGGCTTCCGTCATTAGAAGCTTGCTCATGTAACCTTCCAATATATGTACGATCTCTCAGTAACTTGTAG
>A02:25M26M:493001	TAATACGACTCACTATAGGGTGGTAGGACTTTGAAGGAGAAAATTTTGATTCTCAAAATATTGGACAGATCTCTCAGTAACTTGTAG
>A02:25M26M:492751	TAATACGACTCACTATAGGGTATTTATTGGGTAAGCACCGGCTCATATTTACTGCGTCTCCAAATGCGATCTCTCAGTAACTTGTAG
>A02:25M26M:492651	TAATACGACTCACTATAGGGATAGGCATGCGTGTATATGAATGCCCGACAAATCTATTTGAAACTTTGATCTCTCAGTAACTTGTAG
>A02:25M26M:490701	TAATACGACTCACTATAGGGCATTTGCCAATGCTTCACTTGTTTATGTTTAGGAACGGTTTACATTTGATCTCTCAGTAACTTGTAG
>A02:25M26M:490601	TAATACGACTCACTATAGGGTCTCCAGAGGCAAGAAAACCCTAAAACATTCAACACACAAACTTAAGGATCTCTCAGTAACTTGTAG
>A02:25M26M:490301	TAATACGACTCACTATAGGGAAAAAGCTAATCACAACAAAGAGGACATCTAACGAGTCCATTCTCATGATCTCTCAGTAACTTGTAG
>A02:25M26M:490201	TAATACGACTCACTATAGGGTCATCTTCATTGTACACTTTGCAGCTCCCCGAACATGTCTCACATGGGATCTCTCAGTAACTTGTAG
>A02:25M26M:490101	TAATACGACTCACTATAGGGTCTCTTCAACCCTCTCGCAGCCTTCTAGAATCTTCTCGAGCTTCCCAGATCTCTCAGTAACTTGTAG
>A02:25M26M:489951	TAATACGACTCACTATAGGGGTAATAACTCCTTGAGCTCGTCTCTAAAACTCGAATGCATCGATACAGATCTCTCAGTAACTTGTAG
>A02:25M26M:489801	TAATACGACTCACTATAGGGTCACATTACCATTCTCCTTGGGACGTTTACAACCACCATCAAACGAGGATCTCTCAGTAACTTGTAG
>A02:25M26M:489701	TAATACGACTCACTATAGGGGTCCATCATCTCCCACGTGTTGATCGTTTCTGGCTCTCCAGGAGGCGGATCTCTCAGTAACTTGTAG
>A02:25M26M:489601	TAATACGACTCACTATAGGGGACCATACTTTAGCTTCCATAAGCTTAGCTTGCATTTCCTTCTCTCTGATCTCTCAGTAACTTGTAG
>A02:25M26M:489501	TAATACGACTCACTATAGGGTGGCAAGGTTACCGGTGAAATCTGCCAAGTGTATGCGGCTATGTCCGGATCTCTCAGTAACTTGTAG
>A02:25M26M:489351	TAATACGACTCACTATAGGGTGTCTACCGGAGAATATCCTTGCCGGCAGTGTAGGCAACGTTTACGGGATCTCTCAGTAACTTGTAG
>A02:25M26M:489201	TAATACGACTCACTATAGGGAATGATGTATCAAAGCTAGGACATGGATATTAGCATAATCATAATGAGATCTCTCAGTAACTTGTAG
>A02:25M26M:489101	TAATACGACTCACTATAGGGAGAAGCAAGAAATGTGGTGTTCTTGAAAAGAGAAAAAAAAATCAAGAGATCTCTCAGTAACTTGTAG
>A02:25M26M:489001	TAATACGACTCACTATAGGGGCCATTTGATAGTACTTTCTCTGCATGGACTCCTCTTCTTCCTGCCAGATCTCTCAGTAACTTGTAG
>A02:25M26M:488601	TAATACGACTCACTATAGGGTGGGTAGCTGCCCCTCCCACAAACAACATATAGCTTCACCTACTGGTGATCTCTCAGTAACTTGTAG
>A02:25M26M:487551	TAATACGACTCACTATAGGGCATGATTGCAGTCAAAAGAAAATAAAACATGAGAGACTCTTATGCTAGATCTCTCAGTAACTTGTAG
>A02:25M26M:482851	TAATACGACTCACTATAGGGAAAATAGTGTTTTTCTTCAAGGTATCTATATAAACTCAGTTCTCTCCGATCTCTCAGTAACTTGTAG
>A02:25M26M:487301	TAATACGACTCACTATAGGGTTTCTAGTAGCATCAACTGTGGTGTACGAGGCGCAAGGAACATTCTTGATCTCTCAGTAACTTGTAG
>A02:25M26M:482601	TAATACGACTCACTATAGGGTTACACCATTCGCATGCAAAGGTATGTTATTATTGATTAGTAGACTTGATCTCTCAGTAACTTGTAG
>A02:25M26M:487101	TAATACGACTCACTATAGGGCGTTAAATTCATCAGCAATGCCTCGGCCACATCGAAAAGCACAGATAGATCTCTCAGTAACTTGTAG
>A02:25M26M:487001	TAATACGACTCACTATAGGGGCTGTTAAAGGCAGAGCACCAGTAAGTCCTTACACAGGCTGTAACGTGATCTCTCAGTAACTTGTAG
>A02:25M26M:486801	TAATACGACTCACTATAGGGTACGGATTTTAGAGACGCAATGCTGTCAATGGGAAAAACTTTGATTGGATCTCTCAGTAACTTGTAG
>A02:25M26M:486701	TAATACGACTCACTATAGGGGTCGTGGCTCTGGTGCAATGGACTAAAACCATCACTATATTGGTAAAGATCTCTCAGTAACTTGTAG
>A02:25M26M:486601	TAATACGACTCACTATAGGGTTGACGTTGATGTTAACTCCATTGTTGGAAGTGAAAGAATCGAAACTGATCTCTCAGTAACTTGTAG
>A02:25M26M:486501	TAATACGACTCACTATAGGGTGTCACAACCACCAGATCAGAAAGAAACACTAAAACAGGATCAAACAGATCTCTCAGTAACTTGTAG
>A02:25M26M:486401	TAATACGACTCACTATAGGGCAAAACAGCGGTTTATCACCATAAGTCAGCCTCGTTGCCTAAACTGGGATCTCTCAGTAACTTGTAG
>A02:25M26M:483901	TAATACGACTCACTATAGGGGCGAGAATCTCAGAACTTTTATGTTCTTCCGGATTAGAAGGAGTCAAGATCTCTCAGTAACTTGTAG
>A02:25M26M:483801	TAATACGACTCACTATAGGGCATTATCTGTTTTAGCTTTGTCCTCCTTTAGACAAATATTTGTCTCGGATCTCTCAGTAACTTGTAG
>A02:25M26M:483201	TAATACGACTCACTATAGGGGTTTAGTTACAATGAAACTAACGAAAGTTACGTCAAAGGAATATGCAGATCTCTCAGTAACTTGTAG
>A02:25M26M:483151	TAATACGACTCACTATAGGGATTGTTACTAGCTATAGTAAGAAATGTTTGTAAAATGAAAGCGCGTGGATCTCTCAGTAACTTGTAG
>A02:25M26M:483001	TAATACGACTCACTATAGGGTTTTCGATCATTCTAAATATAGATTGAAGAGAAATGCGGACAGCAACGATCTCTCAGTAACTTGTAG
>A02:25M26M:482901	TAATACGACTCACTATAGGGACTATTCTCTAGCGATCGTAAATTAATCCACAATTTTCTCCTTTTCAGATCTCTCAGTAACTTGTAG
>A02:25M26M:482701	TAATACGACTCACTATAGGGCTAATGTTTCTAGTAGTATCAAGTGTGGTCTACGAGGCGCAAGGAACGATCTCTCAGTAACTTGTAG
>A02:25M26M:482551	TAATACGACTCACTATAGGGCGTGGGTGTCCCGCGACTGAAGGATTCAAGACTTTCTTTTCACTGTTGATCTCTCAGTAACTTGTAG
>A02:25M26M:482451	TAATACGACTCACTATAGGGCTCAGCTAACAACAAAAGTTGACGCCCTCACCAATGCTATATCTGTGGATCTCTCAGTAACTTGTAG
>A02:25M26M:482251	TAATACGACTCACTATAGGGCATGCTGTCAATGGGAAAGACTTTGATTGAGCAGAAGAGGAGTACTTGATCTCTCAGTAACTTGTAG
>A02:25M26M:481951	TAATACGACTCACTATAGGGTGGACTAAAACGGTAGTTACATTGGTGAAAACGGCCGTAGAGACAGCGATCTCTCAGTAACTTGTAG
>A02:25M26M:482051	TAATACGACTCACTATAGGGTTGTTGGAAGTGGAAGTGATGAAAGCCCAGAAAGCGGTTCAGTACTTGATCTCTCAGTAACTTGTAG
>A02:25M26M:481801	TAATACGACTCACTATAGGGACTAATTCAGGTTCAATCATTTACGAAGACACTACCGGTGGAGGTTCGATCTCTCAGTAACTTGTAG
>A02:25M26M:480951	TAATACGACTCACTATAGGGCTGGTGCAACCACAGAAAGCCCAAGTGGTACAACCACAGAAAGCCCGGATCTCTCAGTAACTTGTAG
>A02:25M26M:481201	TAATACGACTCACTATAGGGGGGAGCCCAAGTGGAAGTCCCACAGACGGCCCGAGTGGTGCAACCACGATCTCTCAGTAACTTGTAG
>A02:25M26M:481151	TAATACGACTCACTATAGGGGAGCCAGAGTGATACAACCACGGAGAGCCCAAGTGGAAGTCCCACGGGATCTCTCAGTAACTTGTAG
>A02:25M26M:481401	TAATACGACTCACTATAGGGAAACCACAGACAGCCCGAGTGAAACAACCATGGGGAGCCCGAGTGGAGATCTCTCAGTAACTTGTAG
>A02:25M26M:480851	TAATACGACTCACTATAGGGCACAACCACAGGTGGCCCGAGTGGAAGTCCCACAGACAGCCCGAGCGGATCTCTCAGTAACTTGTAG
>A02:25M26M:481751	TAATACGACTCACTATAGGGCAGTCCGAGTGGAAGTCCCGGATGCAGCCCTTCTTCGACCACGACCAGATCTCTCAGTAACTTGTAG
>A02:25M26M:481551	TAATACGACTCACTATAGGGGTGGTACAGGCACGGGAAGCCCGAGTGGAAGTCCCACGGACAGCCCGGATCTCTCAGTAACTTGTAG
>A02:25M26M:481451	TAATACGACTCACTATAGGGTACAACCATGGGGAGCCCGAGTGGAAGTCCCACGGACAGCCCGAGTGGATCTCTCAGTAACTTGTAG
>A02:25M26M:480701	TAATACGACTCACTATAGGGAAGTTCAACAAGTAGCTCATCAACAACATCAGCGAAAGAAGTCGAGAGATCTCTCAGTAACTTGTAG
>A02:25M26M:480601	TAATACGACTCACTATAGGGGCAGGAACCGTACAACTCGACACTTTCTTCGAGAAACTCAAGACTTCGATCTCTCAGTAACTTGTAG
>A02:25M26M:480501	TAATACGACTCACTATAGGGAAATGAGTTCTGCAGTTAGTTCAGTGTCCGAGGCCGCAACTACTGTTGATCTCTCAGTAACTTGTAG
>A02:25M26M:480351	TAATACGACTCACTATAGGGGTGCACTAGGCTAAGAACCGCATGGAATCTTCCCAAGAAAAATTGATGATCTCTCAGTAACTTGTAG
>A02:25M26M:480201	TAATACGACTCACTATAGGGAGTAAATGGGAACAAGTCACCACCCAGTTTGTGGAGAATCTTGTTTCGATCTCTCAGTAACTTGTAG
>A02:25M26M:479851	TAATACGACTCACTATAGGGGAGACCAATTGATGCGACTCAAATCATCAAGAAAGACAAACTAGTACGATCTCTCAGTAACTTGTAG
>A02:25M26M:479751	TAATACGACTCACTATAGGGACTAAGATCGGTGTAGGCTGCAATGTCAACCGACGTATGCAAATAATGATCTCTCAGTAACTTGTAG
>A02:25M26M:479651	TAATACGACTCACTATAGGGTAAGCGAGACCCATTAAAAGGGATTTTGAATAGTGTTTTGTGTTCTTGATCTCTCAGTAACTTGTAG
>A02:25M26M:479551	TAATACGACTCACTATAGGGAGGAAGACCAGTGGTTACAAATTTAATTGTGGAAAGGAATTAATAAGGATCTCTCAGTAACTTGTAG
>A02:25M26M:479301	TAATACGACTCACTATAGGGGAATGTGATTTCCAAGCATTGTGTTTATGAATAATTCACAAAACCAGGATCTCTCAGTAACTTGTAG
>A02:25M26M:476701	TAATACGACTCACTATAGGGTGTATCAAACCAAAGCCTCATGGCATCCTCGTATGCATCCCCTCAATGATCTCTCAGTAACTTGTAG
>A02:25M26M:478951	TAATACGACTCACTATAGGGTTCGGACCATCTTGTCCACTGAAAGTTTTAATTAACAATAACAAAGTGATCTCTCAGTAACTTGTAG
>A02:25M26M:470901	TAATACGACTCACTATAGGGTCGCGATTTATAAACGTATAGTTCTATTTAAAGAAATGATAGAGGACGATCTCTCAGTAACTTGTAG
>A02:25M26M:470801	TAATACGACTCACTATAGGGCCAAAAACAGAAAGTGTTGGCTTTCTCAAATATAGAAGGTTTACATTGATCTCTCAGTAACTTGTAG
>A02:25M26M:470551	TAATACGACTCACTATAGGGAATTTGCCGTCTTAATCGGTTATAGAACACGAGAGCCATTAACATTTGATCTCTCAGTAACTTGTAG
>A02:25M26M:470251	TAATACGACTCACTATAGGGTATATGAAGCGCAAGGAGGTTTCTTATTAAGGCATTACTTGAGTAAAGATCTCTCAGTAACTTGTAG
>A02:25M26M:470151	TAATACGACTCACTATAGGGATTTATAGACAACCTTGAGAGCTTATGCTCCTCGAAAGTGGAGTACAGATCTCTCAGTAACTTGTAG
>A02:25M26M:469751	TAATACGACTCACTATAGGGTCATAAACTCAACAGCAGGGAAGTCTTCATCGTCAGAATTTGAGTCTGATCTCTCAGTAACTTGTAG
>A02:25M26M:470001	TAATACGACTCACTATAGGGGGGGCTCTTCAAGGCTATCACTGCATTGGGTGTCAAAGCATCGGTAAGATCTCTCAGTAACTTGTAG
>A02:25M26M:469551	TAATACGACTCACTATAGGGTTTTTTTGGCTTTGTGGTAGGCGGATACGAGCAAGTTGATTGAAAGTGATCTCTCAGTAACTTGTAG
>A02:25M26M:469801	TAATACGACTCACTATAGGGTATGGCTGAGTATAAGAGGAGCGGTTCAAAACTGAAGGCTTTTTTGAGATCTCTCAGTAACTTGTAG
>A02:25M26M:469401	TAATACGACTCACTATAGGGCACAAGTAATTGGTCAGTTTGTGAAAACTGTACGTGAGAAGACTGGTGATCTCTCAGTAACTTGTAG
>A02:25M26M:469251	TAATACGACTCACTATAGGGCTGTAAGTGCTGGAGGTGGTAGCTCCGGCGGTGGTGCCTCCTCCTTGGATCTCTCAGTAACTTGTAG
>A02:25M26M:469151	TAATACGACTCACTATAGGGAGCTGGAAGCGCTGGAGATGGAAGCTCTGGAAGTGGTTCTCCCTACCGATCTCTCAGTAACTTGTAG
>A02:25M26M:469051	TAATACGACTCACTATAGGGGGAGCTGGAAACACTGGTATGGGAGATGGAAGTACTGGTGGCAGTGGGATCTCTCAGTAACTTGTAG
>A02:25M26M:468951	TAATACGACTCACTATAGGGGCGGTGGAGGCGGTAGCCCGGGTGGAAGCCCAACTGATAGCTCAACTGATCTCTCAGTAACTTGTAG
>A02:25M26M:468851	TAATACGACTCACTATAGGGTACAACTGGTGCCGGGGGTGGAAGTTCTGGTGATACCGGAAGTACAAGATCTCTCAGTAACTTGTAG
>A02:25M26M:468551	TAATACGACTCACTATAGGGTGATACCGGAAGTACAACTGGTGCCACTGGTGGAAGCTCTGGTGATAGATCTCTCAGTAACTTGTAG
>A02:25M26M:468451	TAATACGACTCACTATAGGGACTGGTGCTGGGGGTGGAAGCTCTGGTGATACCGGAAGTACAACTGGGATCTCTCAGTAACTTGTAG
>A02:25M26M:468701	TAATACGACTCACTATAGGGCTCTGGTGATACCGGAAGTACAACTGGTGCTGCTGGTGGAAGCTCTGGATCTCTCAGTAACTTGTAG
>A02:25M26M:468651	TAATACGACTCACTATAGGGATACCGGAAGTACAACTGGTGCTGCTGGTGGAACTGGTGCTGCTGGTGATCTCTCAGTAACTTGTAG
>A02:25M26M:468401	TAATACGACTCACTATAGGGTACTGGTGGAAGCTCTGGTGATACCGGAAGTACAATGGGTGCCGAGGGATCTCTCAGTAACTTGTAG
>A02:25M26M:467951	TAATACGACTCACTATAGGGAAGTGGCAGCGGTGGAACCTCTGCTGGTGGCGCAAGTGGAAGTCCAAGATCTCTCAGTAACTTGTAG
>A02:25M26M:467851	TAATACGACTCACTATAGGGGGTGGTTCAAGCGGAAATACATCCAATATGTCTACGGAAGAATCAAGGATCTCTCAGTAACTTGTAG
>A02:25M26M:467751	TAATACGACTCACTATAGGGACGCCAGTGAGGAAAGCACTTCCGGAGGTGCAAGTGGAGGTTCAACTGATCTCTCAGTAACTTGTAG
>A02:25M26M:467651	TAATACGACTCACTATAGGGTTCTACAGGTGGAAACACCATGGGGAGTCCCACCGGGAGTCCTTCTGGATCTCTCAGTAACTTGTAG
>A02:25M26M:467601	TAATACGACTCACTATAGGGGAGGTGGGAGCTCTTTCACCGGAAGTGAAACTGGAAGCTCATCTTACGATCTCTCAGTAACTTGTAG
>A02:25M26M:467501	TAATACGACTCACTATAGGGAGCTGCAGGAGCAAATTCAATGAATAGTGGATATTCTGCTAAAGGAAGATCTCTCAGTAACTTGTAG
>A02:25M26M:467401	TAATACGACTCACTATAGGGGGAGCCTCCGAAGGCAAATCTTTCAAAGGAAAAACTGGCTCTACGAGGATCTCTCAGTAACTTGTAG
>A02:25M26M:467301	TAATACGACTCACTATAGGGGCTCCTTCAGCCATTCCTCAGAAGACAAAAGCTCCGGCAACGTCTAAGATCTCTCAGTAACTTGTAG
>A02:25M26M:467201	TAATACGACTCACTATAGGGAGACGGCCCTGCTAATTTACAGCAGCGAGCTGTAGAATGTTTTTGCTGATCTCTCAGTAACTTGTAG
>A02:25M26M:464701	TAATACGACTCACTATAGGGTCAAGATTCTGAAATGATTAATCCATTGATTCGATCTACATCAAATCGATCTCTCAGTAACTTGTAG
>A02:25M26M:464601	TAATACGACTCACTATAGGGGGAAGTTTTTTTATGATGGTATCTTTTGGATGTTTATGTTACCCTGAGATCTCTCAGTAACTTGTAG
>A02:25M26M:464501	TAATACGACTCACTATAGGGCGTATTCCACAAGTTCAAAATCAACTCTAGTTCACCGGAATAATGTAGATCTCTCAGTAACTTGTAG
>A02:25M26M:464351	TAATACGACTCACTATAGGGTAATTGCCGCTTCTTAATTTACTTGCATATCCACGAGAAAAAATTTAGATCTCTCAGTAACTTGTAG
>A02:25M26M:464251	TAATACGACTCACTATAGGGAAAAGTCTAAACCTCAAGGCGACTGGGGTTTATTTTACAACAGTGTAGATCTCTCAGTAACTTGTAG
>A02:25M26M:464151	TAATACGACTCACTATAGGGATTAACATCCACCATCTCCGGACTTTCACTGTTGAGATTGAAATCCAGATCTCTCAGTAACTTGTAG
>A02:25M26M:464051	TAATACGACTCACTATAGGGTTTTTCATATGAAAGCCGTTTCCAGTGGAAGTCTCCATTGAAAATTGGATCTCTCAGTAACTTGTAG
>A02:25M26M:463951	TAATACGACTCACTATAGGGTCAAAGTTATTTCCTTAATTGCTTGTTGTTGTGATAACGTAAGCGTCGATCTCTCAGTAACTTGTAG
>A02:25M26M:463851	TAATACGACTCACTATAGGGTTGCAAGATGGTAAGAGTCTTCATCACCTCTTGTTGATATCCTTGTAGATCTCTCAGTAACTTGTAG
>A02:25M26M:463701	TAATACGACTCACTATAGGGTGACCCAAGTTTCTTGGCTTGCAAGACAGCCATAGCATCCGAGACTTGATCTCTCAGTAACTTGTAG
>A02:25M26M:463551	TAATACGACTCACTATAGGGGAAGAAGCTCTGGAACTCTTGTGTTCCTGGAGATTTGTGCTCAAGGTGATCTCTCAGTAACTTGTAG
>A02:25M26M:463451	TAATACGACTCACTATAGGGACTTTTTTTTCCGTTGAGGAACTTTCTGATGTTTGGTTATTTGTGGAGATCTCTCAGTAACTTGTAG
>A02:25M26M:463351	TAATACGACTCACTATAGGGTCTCTGTAGTCTCTTCTTTTTCACCATTCGTTGAGTCTCCAACACCTGATCTCTCAGTAACTTGTAG
>A02:25M26M:463251	TAATACGACTCACTATAGGGGCTGTCTCCTTCAACATGCTGCACGTTTTGGTTGCTCATGGAATCATGATCTCTCAGTAACTTGTAG
>A02:25M26M:463151	TAATACGACTCACTATAGGGCCTTGAGCTTCCAGTGTTGTATTCTTTGTAGAATCTTCATTGATGTAGATCTCTCAGTAACTTGTAG
>A02:25M26M:463051	TAATACGACTCACTATAGGGGTCCTTGAACCTCTGTCGCCATTGATGTATCACTTGTGGAGCTATTAGATCTCTCAGTAACTTGTAG
>A02:25M26M:462901	TAATACGACTCACTATAGGGCTTTACTTCCATTTAGTTCAGTTGTATTACCATCCTTTGAACCTTCTGATCTCTCAGTAACTTGTAG
>A02:25M26M:462951	TAATACGACTCACTATAGGGATCCGTTTCAACTGTATTACCATCTGTGGAACCTTCCTCCATTGAGTGATCTCTCAGTAACTTGTAG
>A02:25M26M:462251	TAATACGACTCACTATAGGGTTAACTCCATTGTTTTCAACAGTTTCACCATCTTTGGAGTCTTCTTCGATCTCTCAGTAACTTGTAG
>A02:25M26M:461951	TAATACGACTCACTATAGGGTCGGATTCCTCATTTTCAGTGTGAGCATTTGCTTGCATTTCTTTCTCGATCTCTCAGTAACTTGTAG
>A02:25M26M:461901	TAATACGACTCACTATAGGGTTCTTCATTCTTTGCTTGATCTTTTGTTTGCGTTTCTTTTTCAGATAGATCTCTCAGTAACTTGTAG
>A02:25M26M:462001	TAATACGACTCACTATAGGGCTTTTTCAGATTCCTCACTCCTTGCGTGAGCTTCTGCTTGCATTTCTGATCTCTCAGTAACTTGTAG
>A02:25M26M:461651	TAATACGACTCACTATAGGGGCTTGCATTTCTTTTTCACTTTCCTCACTCTTTTCTTTAGCATTTGCGATCTCTCAGTAACTTGTAG
>A02:25M26M:460151	TAATACGACTCACTATAGGGCTTTTCATCGATTTGTTTTTTTCTTGCTCTTTCCTTTTCGCTTCTGCGATCTCTCAGTAACTTGTAG
>A02:25M26M:459901	TAATACGACTCACTATAGGGATATGTGTTCTTCGTGCTCTTTCTGCTTTTTTTTCTCTTCTTCATTTGATCTCTCAGTAACTTGTAG
>A02:25M26M:461401	TAATACGACTCACTATAGGGGTTCTTCATTTTTCTTGGATTTGGTTTCTTCATATTCTCCCTTTTTCGATCTCTCAGTAACTTGTAG
>A02:25M26M:460501	TAATACGACTCACTATAGGGTTTTGGATATGTGTTCTTCGTGCTCTTTCTGCTTCTTTTTGTCTTCTGATCTCTCAGTAACTTGTAG
>A02:25M26M:461251	TAATACGACTCACTATAGGGTTTTTTCGTGCTCTTTCATTTTCTCTTCTTCATTTTTCTTGGCTTTGGATCTCTCAGTAACTTGTAG
>A02:25M26M:460101	TAATACGACTCACTATAGGGCTTTTTGGATATGTGTTCTTTGTGCTTCTTTCGATCTTCTTCATTTTGATCTCTCAGTAACTTGTAG
>A02:25M26M:460051	TAATACGACTCACTATAGGGTCGATTTGTTTTTTTCGTACTCTTTCCTTTTCTCATCTTCCTTCTTTGATCTCTCAGTAACTTGTAG
>A02:25M26M:461051	TAATACGACTCACTATAGGGCTTTCGTGCTCTTTCTTTTTCTCTTCTTCTTTCTTTTTGGATTTGTGGATCTCTCAGTAACTTGTAG
>A02:25M26M:460301	TAATACGACTCACTATAGGGTTTTTGGATATGTGTTCTTCATGCTCTTTCTGCTTCTTTTTCTCTTCGATCTCTCAGTAACTTGTAG
>A02:25M26M:462801	TAATACGACTCACTATAGGGTTCATTGACTTCTACTGTCTGACTATCTTTAGAACCTTCCTCTACCGGATCTCTCAGTAACTTGTAG
>A02:25M26M:462701	TAATACGACTCACTATAGGGTCTATTGGAACTTCTTTTCTTCCATCGATTTCAGCTGTCTTACCATTGATCTCTCAGTAACTTGTAG
>A02:25M26M:462201	TAATACGACTCACTATAGGGAGAACCTTCTTTGATTTCAGTTGTTTTGCCATCTGCGGAACCTTCCTGATCTCTCAGTAACTTGTAG
>A02:25M26M:462101	TAATACGACTCACTATAGGGTCTTGCTTTTTCATCGAGGAATCTTCATTTTCTGCTTGAGCCTTTGTGATCTCTCAGTAACTTGTAG
>A02:25M26M:461751	TAATACGACTCACTATAGGGATGAGTCTTTGTTTGCATTTCTTTTACAGATTCCTCACTCTTTGTTGGATCTCTCAGTAACTTGTAG
>A02:25M26M:461851	TAATACGACTCACTATAGGGCACTTTTTGCTTGAGCTTCTGCTTGCATATTTTTCTCATGTTCTTCAGATCTCTCAGTAACTTGTAG
>A02:25M26M:461701	TAATACGACTCACTATAGGGCATCTGCTTGCATTTCTTTATCTGATTCCTCACTCCTTGATAGAGTCGATCTCTCAGTAACTTGTAG
>A02:25M26M:457301	TAATACGACTCACTATAGGGCCATCATTTCTAGCATCAACCTCCGACTTAACATCTTCTTTAGTATCGATCTCTCAGTAACTTGTAG
>A02:25M26M:457051	TAATACGACTCACTATAGGGGTCTCCAATATTTTCTCCTTGAACCTCTACTTCCTTCTCCTTATTAGGATCTCTCAGTAACTTGTAG
>A02:25M26M:457751	TAATACGACTCACTATAGGGTTGTCATTCTAAATAACTTCATTACCTCCTTTAAGGTCTTCTTCATTGATCTCTCAGTAACTTGTAG
>A02:25M26M:457001	TAATACGACTCACTATAGGGCAGCATTTCCACTTTTGGTATGCATGTTTTCTTCATTCATAGAAACTGATCTCTCAGTAACTTGTAG
>A02:25M26M:458151	TAATACGACTCACTATAGGGAGTCTCTACAAAACCATCATCCTTCACTTCTTTATTATCTTTGTTGTGATCTCTCAGTAACTTGTAG
>A02:25M26M:457451	TAATACGACTCACTATAGGGTCTGCATTGTTTTCTTGAGTATTTTTCCCATTTTCTTTTGTGTGGTAGATCTCTCAGTAACTTGTAG
>A02:25M26M:456701	TAATACGACTCACTATAGGGTAGCTTCTTCCAAGTTCTTAGTAATGGAACTTCCATCAGTATTAGCCGATCTCTCAGTAACTTGTAG
>A02:25M26M:456601	TAATACGACTCACTATAGGGATCAATACTCCCTCCTTGAACTTCTAATTGCTTCTCATTATTCACATGATCTCTCAGTAACTTGTAG
>A02:25M26M:456501	TAATACGACTCACTATAGGGAAAAAACTTATTACCTCCTTTAACATCTTCTACTCTATTGCCTTCTTGATCTCTCAGTAACTTGTAG
>A02:25M26M:456401	TAATACGACTCACTATAGGGTCTGAATTTTCTTGCATGGACTCGGAATTTCCTTTATTTGACTCCAAGATCTCTCAGTAACTTGTAG
>A02:25M26M:456301	TAATACGACTCACTATAGGGCTGAAGCCGCACTTGAACTTTTTGACTTAACTTCTACAACAATCTCCGATCTCTCAGTAACTTGTAG
>A02:25M26M:456201	TAATACGACTCACTATAGGGCTTTTGTTCCAAAGAAAGTGACATTGATTCGTCCCCTTTTATATGTTGATCTCTCAGTAACTTGTAG
>A02:25M26M:456101	TAATACGACTCACTATAGGGACTTTAAACATCTCCTTCCTTACACTTGAACTCAACTGTCGTATTCAGATCTCTCAGTAACTTGTAG
>A02:25M26M:456001	TAATACGACTCACTATAGGGGTCATGGAAGTTAGTTCAGTATTGGCCACATAAGACTAGAACTTTGAGATCTCTCAGTAACTTGTAG
>A02:25M26M:455801	TAATACGACTCACTATAGGGACACTCACAATCAGTAAAACATTTATTTGAGTCATTCAAAAGGATGAGATCTCTCAGTAACTTGTAG
>A02:25M26M:455701	TAATACGACTCACTATAGGGTTGGAGGAGATTATCGGCTTTCGATTTCATATGGGACATGAACGTTTGATCTCTCAGTAACTTGTAG
>A02:25M26M:455601	TAATACGACTCACTATAGGGTCCTTTAGTTTCTCAAAGAATGATCTTAGCTTTTCTCTTATCGGACAGATCTCTCAGTAACTTGTAG
>A02:25M26M:455501	TAATACGACTCACTATAGGGCTATATCTTTAATCGTATTTGGCGCATTCACGGCTATCTCGTGTGCTGATCTCTCAGTAACTTGTAG
>A02:25M26M:455301	TAATACGACTCACTATAGGGAGATTTATGGAATCAATGACTTAGAGAATTTGATGGACACATCTTTGGATCTCTCAGTAACTTGTAG
>A02:25M26M:452051	TAATACGACTCACTATAGGGTTGTCTAGATTTAAATGATGGACCCTGTCAGCTTCAACGTATCAAACGATCTCTCAGTAACTTGTAG
>A02:25M26M:446801	TAATACGACTCACTATAGGGTAGTGTCTCGATTTCAATTGGAAACGAATGATATATATCTTCTGATTGATCTCTCAGTAACTTGTAG
>A02:25M26M:451901	TAATACGACTCACTATAGGGTCGTGCATTTTATTCATCCAATCACATTGTTTTGCCATTGCCAGACTGATCTCTCAGTAACTTGTAG
>A02:25M26M:451801	TAATACGACTCACTATAGGGCAACATTACAACAATCACACATCGTTATAGTTTAGCACGTGTTGTATGATCTCTCAGTAACTTGTAG
>A02:25M26M:451701	TAATACGACTCACTATAGGGCGGCCAGTGGCACGAAATTATACGTAGTATGAAGTAACGTCAAAAAAGATCTCTCAGTAACTTGTAG
>A02:25M26M:446451	TAATACGACTCACTATAGGGCTTCCACAAACGTGCGTACCTAATTTACTCGAAATAATTGAGGCAATGATCTCTCAGTAACTTGTAG
>A02:25M26M:446251	TAATACGACTCACTATAGGGCGGCGCAAATTAAACCTACCGCCGAGTCCAGCTTGGCCATATCCTATGATCTCTCAGTAACTTGTAG
>A02:25M26M:446151	TAATACGACTCACTATAGGGTCTCCAAGTCACTAGGCGGCGCCTCCATTTTCTCACTCCGCCTAGGCGATCTCTCAGTAACTTGTAG
>A02:25M26M:446051	TAATACGACTCACTATAGGGCAAGAACGACGTGGTTTTTGCGAACCGGCCGGAGTTTCTTTTCGCGAGATCTCTCAGTAACTTGTAG
>A02:25M26M:441851	TAATACGACTCACTATAGGGGTTTAATAATCGAATTTCAGGAACCTGCGAAGGTGGAGCTGGGATCAGATCTCTCAGTAACTTGTAG
>A02:25M26M:441751	TAATACGACTCACTATAGGGATATTACGGCGATGGAACAGAGGACGACGATGAGTCAAAACACGTTAGATCTCTCAGTAACTTGTAG
>A02:25M26M:441651	TAATACGACTCACTATAGGGTATTTCCCGATCCTTTGTTGGTTAACAGATTATGAGAAACGGGTCAAGATCTCTCAGTAACTTGTAG
>A02:25M26M:441501	TAATACGACTCACTATAGGGCAAGAAACTCAGCCTGAGTACTATACCGATGTCATCATCAAAGGAATGATCTCTCAGTAACTTGTAG
>A02:25M26M:441201	TAATACGACTCACTATAGGGCAGAGCATAGTGGCAGAGACATTACGACTTTATCCTGTGGTTCCAATGATCTCTCAGTAACTTGTAG
>A02:25M26M:441101	TAATACGACTCACTATAGGGCACGTAAAACAATCTTATTGGTGAACGTATGGGCCATACATAGAGACGATCTCTCAGTAACTTGTAG
>A02:25M26M:440951	TAATACGACTCACTATAGGGCTGGATTAGGGCTAGGTCAGCGGCTAGTAACGTTGGCTTTGGGTTCGGATCTCTCAGTAACTTGTAG
>A02:25M26M:440851	TAATACGACTCACTATAGGGAGAAGCTGCGAAAGGAATCACAATGCATAAGTCTACGTCGTTGGAAGGATCTCTCAGTAACTTGTAG
>A02:25M26M:440751	TAATACGACTCACTATAGGGTGTCCATAAACTCCATCTTCAGAATCTTGTTATACTCGTCTCATTGTGATCTCTCAGTAACTTGTAG
>A02:25M26M:440501	TAATACGACTCACTATAGGGCCCGTCTCCTACTCCCATGTTGATCGAGACAAGCAAAATATAGTAGGGATCTCTCAGTAACTTGTAG
>A02:25M26M:440351	TAATACGACTCACTATAGGGTTTTTATTGCTCGATGTCACACTATAAAACCTGCTTAAGCACTTGTGGATCTCTCAGTAACTTGTAG
>A02:25M26M:440051	TAATACGACTCACTATAGGGGCCTAGGCACACGTCTCGTTTTCGTTGTCTCTTCTCACTCCGTCGCGGATCTCTCAGTAACTTGTAG
>A02:25M26M:439951	TAATACGACTCACTATAGGGCTTCGGAAAGTATATCGGATACAATTCAAGCACCATGGTCAGTGCGGGATCTCTCAGTAACTTGTAG
>A02:25M26M:451051	TAATACGACTCACTATAGGGGATCCGACGGCTGATATTATGTTTATCGAAAAACTCCCTACAAGTAAGATCTCTCAGTAACTTGTAG
>A02:25M26M:439551	TAATACGACTCACTATAGGGCGGTGGATAAGAATCTAGTTATGTAACCAAGTAATTTGGATTAACATGATCTCTCAGTAACTTGTAG
>A02:25M26M:441551	TAATACGACTCACTATAGGGGTGCAGAGAAAGTAAAGGGTAGCACCATGATCGATCGCTTGCTTTCTGATCTCTCAGTAACTTGTAG
>A02:25M26M:438151	TAATACGACTCACTATAGGGCCTTAGATACTATTGCATCTCTGGGGGGGCATTGGAGTGTTTAGTTAGATCTCTCAGTAACTTGTAG
>A02:25M26M:440701	TAATACGACTCACTATAGGGAAGGCTCGTACATTCCGTGGGGCGAGACTCAACCTTACTAGACATTTGATCTCTCAGTAACTTGTAG
>A02:25M26M:440601	TAATACGACTCACTATAGGGCAAATATGTTGTGACACATGCAGTGACGTCTAACACATCACATGAAAGATCTCTCAGTAACTTGTAG
>A02:25M26M:446301	TAATACGACTCACTATAGGGTATCTCTTGTCTTCCTCTTCATCTCTCTGACGTTCTTGCTCGGAACAGATCTCTCAGTAACTTGTAG
>A02:25M26M:451351	TAATACGACTCACTATAGGGACGGAGCTTTCTCTCTCTCTCCAAGTCACTAGGCGGCGCCTCCATTTGATCTCTCAGTAACTTGTAG
>A02:25M26M:451251	TAATACGACTCACTATAGGGGCCGAGGAATGCTTCACCAAGAACGACGTGGTTTTTGCGAACCGGCCGATCTCTCAGTAACTTGTAG
>A02:25M26M:440901	TAATACGACTCACTATAGGGGTCCAGTGTTTCGAGTGGGAGAGAACCGGAGAAGAATATGTGGACATGATCTCTCAGTAACTTGTAG
>A02:25M26M:438051	TAATACGACTCACTATAGGGGCTAATCTCATCCTTGTATCGCTTCTTGTCAACTTGCGCCTTAGCTTGATCTCTCAGTAACTTGTAG
>A02:25M26M:437801	TAATACGACTCACTATAGGGTCTGTTAAGTGAAAACGATACTATTAATCAAGACATTGCCTAAGAGTGATCTCTCAGTAACTTGTAG
>A02:25M26M:437701	TAATACGACTCACTATAGGGGAGAAGTACATGAAACCAGACATTGCCTTTTTAGGTGCATTGGGATCGATCTCTCAGTAACTTGTAG
>A02:25M26M:436501	TAATACGACTCACTATAGGGTGGAGAAAAACAGATTGAAACGGTTAAAGAAACAAACTTCTAAAAGAGATCTCTCAGTAACTTGTAG
>A02:25M26M:435851	TAATACGACTCACTATAGGGGAAAAAAACTTCAATCAACTTACTTGAGCAGGTGGGCGAGTTTCATCGATCTCTCAGTAACTTGTAG
>A02:25M26M:435651	TAATACGACTCACTATAGGGGAAACTCCAACAAGACGTCATTCTTCCCTTGAAGCTGAGTCTGTGACGATCTCTCAGTAACTTGTAG
>A02:25M26M:435501	TAATACGACTCACTATAGGGAAGAAGACAAAAGAAGCTTAAACTCAACCAAATTATGATTCTTTCCGGATCTCTCAGTAACTTGTAG
>A02:25M26M:435251	TAATACGACTCACTATAGGGTCTTCAGGCGTTTTCCCAAACGCACTTTGGAAAAAGCTGGTCAGGCTGATCTCTCAGTAACTTGTAG
>A02:25M26M:435001	TAATACGACTCACTATAGGGTTTGTCGACCTCCACAGCTTTGCCGCCGCCTTGCTTCTTCCATTGAAGATCTCTCAGTAACTTGTAG
>A02:25M26M:434801	TAATACGACTCACTATAGGGGATCCGCCGCGGCCACTGAGGGAGATGTTGTTGAAGGAATGAACGTCGATCTCTCAGTAACTTGTAG
>A02:25M26M:431601	TAATACGACTCACTATAGGGAAACAAGAGTCTGGAGCAATCAAGCAAAACCAACAACCACTACACCGGATCTCTCAGTAACTTGTAG
>A02:25M26M:431201	TAATACGACTCACTATAGGGCTCCATAACACCACGAACCTAACAGTGAATGACAAATTGACAATTAGGATCTCTCAGTAACTTGTAG
>A02:25M26M:431001	TAATACGACTCACTATAGGGATATAGTTTGGGTCTACAATGCTTACAGAAGACCAAAGTTAGAGTAGGATCTCTCAGTAACTTGTAG
>A02:25M26M:430851	TAATACGACTCACTATAGGGGATAATAACCTATTGATGGTGATGTTCACAGCTCTTCTGTCAGCTTCGATCTCTCAGTAACTTGTAG
>A02:25M26M:430501	TAATACGACTCACTATAGGGTTTCAGCGATGTACCTCTGAGGTTAAGCATTCAGAGAAATAAGGAGCGATCTCTCAGTAACTTGTAG
>A02:25M26M:430401	TAATACGACTCACTATAGGGCTGCCAGCGTGGCAATGCTGGAAAAGAGAAATCATTAGCAAAAACATGATCTCTCAGTAACTTGTAG
>A02:25M26M:430251	TAATACGACTCACTATAGGGCTCTCGTGGAGGGTTCCAGTAACAATCAGCACGACGTTGTCAATCATGATCTCTCAGTAACTTGTAG
>A02:25M26M:429851	TAATACGACTCACTATAGGGTACCTGATGTACTCTAAGAAGGTTGACATAGGCTCAGTTGCTTGACAGATCTCTCAGTAACTTGTAG
>A02:25M26M:429751	TAATACGACTCACTATAGGGTTGTGGTATGCAGAGGTGACGGTTCTGCAGCCACAGATTAAAAAAATGATCTCTCAGTAACTTGTAG
>A02:25M26M:429651	TAATACGACTCACTATAGGGCAAGAACAGAACAAATCACTGTCTTGTCTAAACATCATCTTAGAGATGATCTCTCAGTAACTTGTAG
>A02:25M26M:429401	TAATACGACTCACTATAGGGAGAACATTTTGTTACAACAATAATGGAACAGAGATTCAAACAAACACGATCTCTCAGTAACTTGTAG
>A02:25M26M:429501	TAATACGACTCACTATAGGGGACAAAAGAACAGGATAAATCACTGTCTTGTCTAAACACCAGGTTTGGATCTCTCAGTAACTTGTAG
>A02:25M26M:429251	TAATACGACTCACTATAGGGCAATTCGTAACCCTAAAACCCAGAAACTCACATCAACCAAAACAGAAGATCTCTCAGTAACTTGTAG
>A02:25M26M:429201	TAATACGACTCACTATAGGGAAGTCAACTAATCAGATCATCATCACGGATCGAGAGAGCGATCAAATGATCTCTCAGTAACTTGTAG
>A02:25M26M:428951	TAATACGACTCACTATAGGGCCTTGCCTTTACGGAGATAATTCAGATCTTAAAGGTTGAACGGAGAGGATCTCTCAGTAACTTGTAG
>A02:25M26M:427901	TAATACGACTCACTATAGGGAGTTCCATCCACTCAAAGAACACAAACCAGGATCCACAGACCATCTCGATCTCTCAGTAACTTGTAG
>A02:25M26M:427751	TAATACGACTCACTATAGGGTCTTTTCCTTTAGGCTTTGGTGATTGCCTCGCATTCCGATAAGGCGAGATCTCTCAGTAACTTGTAG
>A02:25M26M:427651	TAATACGACTCACTATAGGGCCACAAACCCACCTCCTTGTGTCCTAACACCGTTCTTAGCAACAGGCGATCTCTCAGTAACTTGTAG
>A02:25M26M:427501	TAATACGACTCACTATAGGGCTCGGTTAAGGCACTGTGCCGCTACTTGGGTGGCTTTCTGAGCTCCCGATCTCTCAGTAACTTGTAG
>A02:25M26M:427401	TAATACGACTCACTATAGGGTTTGTCTAAAAGATGAGGTTTCACCCATTCCACCAGGTTTTGTTCACGATCTCTCAGTAACTTGTAG
>A02:25M26M:427301	TAATACGACTCACTATAGGGACTACTCCGAAGCTGTATACGTCACTCTTCGTTGTCAAATGTCCTGAGATCTCTCAGTAACTTGTAG
>A02:25M26M:427051	TAATACGACTCACTATAGGGGGAGGGAGTAATAACAAAGGGGAGAGGATACTTTACTCACCAGTCATGATCTCTCAGTAACTTGTAG
>A02:25M26M:426951	TAATACGACTCACTATAGGGGTGATTTCTTCTCGTCTGGGGCATCTTTAGCTAGCCCAAAGTCAGAGGATCTCTCAGTAACTTGTAG
>A02:25M26M:426701	TAATACGACTCACTATAGGGGCAATTTTCATTCTGACAGACCAAGGGAGAGGTAAAGTCCCTGAAACGATCTCTCAGTAACTTGTAG
>A02:25M26M:426451	TAATACGACTCACTATAGGGAGTTAATCTCAGCCTGTACATAAAATTTAGCAACATGATCAAAACATGATCTCTCAGTAACTTGTAG
>A02:25M26M:426351	TAATACGACTCACTATAGGGAGCCACTCCTTGTGACCTTGAAGACCATCTGGGTTCAGTGTTTTGACGATCTCTCAGTAACTTGTAG
>A02:25M26M:426201	TAATACGACTCACTATAGGGGGTCTGAAGTTCCTAGTGGCTAACTTGAGGTCGTTAAACATGAATATGATCTCTCAGTAACTTGTAG
>A02:25M26M:426101	TAATACGACTCACTATAGGGCACTCTCCGGACGGCTAACATCTTTAGACGAAGGTGGATGATCTTCAGATCTCTCAGTAACTTGTAG
>A02:25M26M:425801	TAATACGACTCACTATAGGGTTCTGAACCAGAACCCACTTTCACTCTCATCTCCATCTCTCTTATTTGATCTCTCAGTAACTTGTAG
>A02:25M26M:425651	TAATACGACTCACTATAGGGAGAGAAGCCCTAGAACAGATCACTCCCTCTCATCACATCCATAGAAAGATCTCTCAGTAACTTGTAG
>A02:25M26M:425601	TAATACGACTCACTATAGGGATCTCGATCAGACCCAGAACGTGAAATTGATGGAAAGAGCAGAAAGTGATCTCTCAGTAACTTGTAG
>A02:25M26M:425401	TAATACGACTCACTATAGGGAGAAAGTTTTTAGTCAAAAGGGATGGATTCTCTTTTTGAGAAAGATAGATCTCTCAGTAACTTGTAG
>A02:25M26M:424601	TAATACGACTCACTATAGGGGTTTTCTCCTCTCTCGTCATTTATTCTTTAGATATCAGAAATGCAAGGATCTCTCAGTAACTTGTAG
>A02:25M26M:424301	TAATACGACTCACTATAGGGGGTAGGCAACTAACTTGTTGAAGTTACAGGTGGTTGTCTTTTTTGACGATCTCTCAGTAACTTGTAG
>A02:25M26M:424151	TAATACGACTCACTATAGGGAGAGTCACGGGAGAAGATGGTGAGATACGCGGCAAAGAACACACAACGATCTCTCAGTAACTTGTAG
>A02:25M26M:419601	TAATACGACTCACTATAGGGGTGAAAACTAACTAACTAAAAGACCAGGTCTTATAAAGATGTCAAGGGATCTCTCAGTAACTTGTAG
>A02:25M26M:419401	TAATACGACTCACTATAGGGATTTGAATAAAGGTAACTTATCCAAAGTTAGAGTGGTCTTTAATGCAGATCTCTCAGTAACTTGTAG
>A02:25M26M:418351	TAATACGACTCACTATAGGGTCTTAATGCTGCCTACCATTTTTGCACCATTAAGTTTATGACAAGTCGATCTCTCAGTAACTTGTAG
>A02:25M26M:418251	TAATACGACTCACTATAGGGAGATAACCTGAACCTTTGCTAATAGAATAAATATAGGTGGTACTTGAGATCTCTCAGTAACTTGTAG
>A02:25M26M:418101	TAATACGACTCACTATAGGGAGACGGCCTAATACAACAATCAAATATATACTTAAGACGGCCTAATAGATCTCTCAGTAACTTGTAG
>A02:25M26M:418001	TAATACGACTCACTATAGGGACACAACACACAAATAAAACAACACACATCAGGCTTCACTTCTTTTCGATCTCTCAGTAACTTGTAG
>A02:25M26M:417901	TAATACGACTCACTATAGGGTGATCCCTTAACTTTCTTCTCGTCTTCCTCTGTCTTCTTGTTATCTGGATCTCTCAGTAACTTGTAG
>A02:25M26M:417701	TAATACGACTCACTATAGGGGCATCAAAGTCTCTGCTACATCAGCAGGAGACATATCTGTTTCCTCAGATCTCTCAGTAACTTGTAG
[truncated: 15,021 more rows]

## Sheet: A1_4m5m_Atto550
A01:4M5M:103801:	ATAAGAGAAAGCCATGCCTCCAAAGCAGATATGAAGGAGAGGATCGA
[truncated: 20,052 more rows]

[truncated: 1 more sheets: A06_on]
